# Supplementary material for: Heparin length in the coating of extremely small iron oxide nanoparticles regulates in vivo theranostic applications
Source: Royal Society of Chemistry journal article supplement (doi:10.1039/d0nr06378a), 2020-12-22
Supplement: d0nr06378a1.xlsx [file d0nr06378a1.xlsx]

## Sheet: Calcul of density
HEP-ESIONPs	Mw (KDa)	Core Size (nm)	Volume (nm3)	Surface (nm2)	Volume (cm3)	Magnetite weight (sphere) mg	Fe weight (sphere) mg	O weight (sphere) mg	[HEP] mg/mL	[Fe] mg/mL	Ratio	Nbr NP /ml	Nbr Hep /ml	Nr heparin/NP	Nr heparin/nm2
HEP0-ESIONP	12.7259	6.55013	147.146	134.787	1.47146e-19	6.59213e-16	4.77e-16	1.82219e-16	12.55	0.91414	13.7288	1.91643e+15	5.93679e+17	309.783	2.29831
HEP4-ESIONP	7.02855	4.27141	40.8049	57.3181	4.08049e-20	1.82806e-16	1.32276e-16	5.05309e-17	10.25	1.00322	10.2171	7584261200100985	8.7792e+17	115.755	2.01953
HEP8-ESIONP	5.5325	3.94092	32.0473	48.7916	3.20473e-20	1.43572e-16	1.03887e-16	3.96859e-17	9.55	1.1416	8.36543	1.09889e+16	1.03915e+18	94.5639	1.93812
HEP12-ESIONP	4.46252	3.37565	20.1406	35.7985	2.01406e-20	9.02297e-17	6.52893e-17	2.49412e-17	7.16	1.13004	6.33606	1.73082e+16	9.65894e+17	55.8056	1.55888
HEP24-ESIONP	3.75108	2.2287	5.79631	15.6046	5.79631e-21	2.59674e-17	1.87898e-17	7.17788e-18	6.21	1.16882	5.31306	6.22049e+16	9.96625e+17	16.0217	1.02673
				Magnetite	1 cm3 pèse 5170 mg
				Maghemite	1 cm3 pèse 4480 mg

## Sheet: Theoric heights
Time	DP	Core Size (nm)	Hydrodynamic Size (nm)	Height (nm)	Lit, height (nm)	Lit, HD (nm)	Max Height (nm)	Max HD (nm)	Theoric SDPB	Theoric SDPB H	Rc	Height c	Density
0	42.4197	6.55013	43.434	18.4419	13.3117	33.1736	21.2098	48.9698	5.57558	1.26581	12.5687	9.29365	2.29831
4	23.4285	4.27141	22.412	9.0703	9.07045	22.4123	11.7142	27.6999	4.37459	0.957621	7.68303	5.54733	2.01953
8	18.4417	3.94092	20.74	8.39954	7.7707	19.4823	9.22084	22.3826	3.97495	0.924255	6.94424	4.97378	1.93812
12	14.8751	3.37565	17.666	7.14517	6.76305	16.9018	7.43753	18.2507	3.46587	0.854013	5.33459	3.64676	1.55888
24	12.5036	2.2287	16.14	6.95565	6.04511	14.3189	6.2518	14.7323	2.69763	0.842338	2.85835	1.744	1.02673
	DP = 0,5 nm
											Nu *
Size of free HO according to their DP, provided by S. Khan and coworkers											0.197516
DP	Size
6	3
12	6
18	7.4
24	9.4
30	10.3
36	12.3
Plot to find the DPn relationship
1.07918	0.778151
1.25527	0.869232
1.38021	0.973128
1.47712	1.01284
1.5563	1.08991
									Scale with the expected n= 1/5 according to MWC-WZ model
Extrapolation of the equation obtained in the [10-45] DP range
10	5.23239
12	5.88663
14	6.50321
16	7.08928
18	7.64992
20	8.1889
22	8.70911
24	9.21282
26	9.70188
28	10.1778
30	10.6418
32	11.095
34	11.5383
36	11.9724
38	12.3981
40	12.816
42	13.2265
44	13.6301
42.4197	13.3117
23.4285	9.07045
18.4417	7.7707
14.8751	6.76305
12.5036	6.04511
