# Supplementary material for: Heparin length in the coating of extremely small iron oxide nanoparticles regulates in vivo theranostic applications
Source: Royal Society of Chemistry journal article supplement (doi:10.1039/d0nr06378a), 2020-12-22
Supplement: d0nr06378a2.xlsx [file d0nr06378a2.xlsx]

## Sheet: Raw data
		NSAF												PSMs												Peptides												Unique Peptides
		CitA			A			B			C			CitA			A			B			C			CitA			A			B			C			CitA			A			B			C
Accession	Description	R1	R2	R3	0h	8h	24h	0h	8h	24h	0h	8h	24h	R1	R2	R3	0h	8h	24h	0h	8h	24h	0h	8h	24h	R1	R2	R3	0h	8h	24h	0h	8h	24h	0h	8h	24h	R1	R2	R3	0h	8h	24h	0h	8h	24h	0h	8h	24h
P10852	4F2 cell-surface antigen heavy chain OS=Mus musculus GN=Slc3a2 PE=1 SV=1 - [4F2_MOUSE]	0	0	0	0	0	0	0	0	0	0.0670461	0	0	0	0	0	0	0	0	0	0	0	2	0	0	0	0	0	0	0	0	0	0	0	2	0	0	0	0	0	0	0	0	0	0	0	2	0	0
Q9DCD0	6-phosphogluconate dehydrogenase, decarboxylating OS=Mus musculus GN=Pgd PE=1 SV=3 - [6PGD_MOUSE]	0	0	0	0	0	0.0592693	0	0	0	0	0	0.082846	0	0	0	0	0	2	0	0	0	0	0	2	0	0	0	0	0	2	0	0	0	0	0	2	0	0	0	0	0	2	0	0	0	0	0	2
P60710	Actin, cytoplasmic 1 OS=Mus musculus GN=Actb PE=1 SV=1 - [ACTB_MOUSE]	0.27372	0.20254	0.189291	0.0625589	0.105923	0.151231	0.458753	0.29919	0.37422	0.374858	0.379963	0.475625	7	5	5	2	3	4	12	7	9	8	7	9	4	4	3	2	3	3	7	5	6	7	6	7	4	4	3	2	3	3	7	5	6	7	6	7
P22599	Alpha-1-antitrypsin 1-2 OS=Mus musculus GN=Serpina1b PE=1 SV=2 - [A1AT2_MOUSE]	0.532469	0.441281	0.309312	0.397541	0.416684	0.308899	0.41646	0	0.377467	0.382837	0	0	15	12	9	14	13	9	12	0	10	9	0	0	1	1	1	1	1	1	1	0	1	2	0	0	8	8	8	9	9	7	8	0	7	7	0	0
Q00896	Alpha-1-antitrypsin 1-3 OS=Mus musculus GN=Serpina1c PE=1 SV=2 - [A1AT3_MOUSE]	0.7123	0.701	0.551702	0.51281	0.675326	0.550966	0.591931	0.545006	0.681682	0.469455	0.593265	0.433201	20	19	16	18	21	16	17	14	18	11	12	9	3	4	3	4	6	4	4	10	4	4	8	7	10	11	10	11	14	10	11	10	10	9	8	7
Q61247	Alpha-2-antiplasmin OS=Mus musculus GN=Serpinf2 PE=1 SV=1 - [A2AP_MOUSE]	0	0.0615094	0.0574859	0	0.0536131	0.0861139	0.0870744	0	0	0	0	0	0	2	2	0	2	3	3	0	0	0	0	0	0	2	2	0	2	2	2	0	0	0	0	0	0	2	2	0	2	2	2	0	0	0	0	0
P29699	Alpha-2-HS-glycoprotein OS=Mus musculus GN=Ahsg PE=1 SV=1 - [FETUA_MOUSE]	0.131171	0	0	0.104928	0.236881	0.211378	0	0.143377	0.0929873	0	0	0.23637	3	0	0	3	6	5	0	3	2	0	0	4	2	0	0	3	5	5	0	2	2	0	0	3	2	0	0	3	5	5	0	2	2	0	0	3
Q6GQT1	Alpha-2-macroglobulin-P OS=Mus musculus GN=A2m PE=2 SV=2 - [A2MG_MOUSE]	0	0	0	0	0	0.019202	0	0	0	0	0	0	0	0	0	0	0	2	0	0	0	0	0	0	0	0	0	0	0	2	0	0	0	0	0	0	0	0	0	0	0	2	0	0	0	0	0	0
Q7TPR4	Alpha-actinin-1 OS=Mus musculus GN=Actn1 PE=1 SV=1 - [ACTN1_MOUSE]	0	0	0	0	0	0	0.0309608	0	0	0	0	0	0	0	0	0	0	0	2	0	0	0	0	0	0	0	0	0	0	0	2	0	0	0	0	0	0	0	0	0	0	0	2	0	0	0	0	0
P17182	Alpha-enolase OS=Mus musculus GN=Eno1 PE=1 SV=3 - [ENOA_MOUSE]	0	0	0	0	0	0.0669458	0.0676925	0.0756818	0	0.124455	0.144171	0.140364	0	0	0	0	0	2	2	2	0	3	3	3	0	0	0	0	0	2	2	2	0	3	3	2	0	0	0	0	0	2	2	2	0	3	3	3
P32261	Antithrombin-III OS=Mus musculus GN=Serpinc1 PE=1 SV=1 - [ANT3_MOUSE]	1.47498	1.30041	1.21535	1.17988	1.84188	1.51716	1.41135	1.74944	1.73527	1.69227	1.65541	1.56929	47	40	40	47	65	50	46	51	52	45	38	37	21	21	21	20	24	24	21	25	24	23	24	22	21	21	21	20	24	24	21	25	24	23	24	22
Q00623	Apolipoprotein A-I OS=Mus musculus GN=Apoa1 PE=1 SV=2 - [APOA1_MOUSE]	0.906193	0.883535	0.670914	0.596968	0.673846	1.44312	1.61556	1.51491	1.24701	1.21365	1.40592	1.58493	17	16	13	14	14	28	31	26	22	19	19	22	12	12	10	12	10	18	17	16	15	14	14	15	12	12	10	12	10	18	17	16	15	14	14	15
P06728	Apolipoprotein A-IV OS=Mus musculus GN=Apoa4 PE=1 SV=3 - [APOA4_MOUSE]	0	0	0	0	0	0.070085	0.141734	0.198077	0	0.173721	0.100621	0	0	0	0	0	0	2	4	5	0	4	2	0	0	0	0	0	0	2	4	3	0	4	2	0	0	0	0	0	0	2	4	3	0	4	2	0
E9Q414	Apolipoprotein B-100 OS=Mus musculus GN=Apob PE=1 SV=1 - [APOB_MOUSE]	0.0160178	0.0232306	0.0217111	0.0153757	0.0260336	0.0681438	0.0876958	0.0700329	0.0579104	0.0422273	0.0489169	0.0389662	5	7	7	6	9	22	28	20	17	11	11	9	4	5	5	4	7	16	19	14	14	9	9	8	4	5	5	4	7	16	19	14	14	9	9	8
P08226	Apolipoprotein E OS=Mus musculus GN=Apoe PE=1 SV=2 - [APOE_MOUSE]	0.63702	0.612774	0.57269	0.400376	0.534108	0.571927	0.489336	0.64656	0.628991	0.654297	0.568463	0.860929	14	13	13	11	13	13	11	13	13	12	9	14	11	10	11	10	11	10	10	10	11	8	8	10	11	10	11	10	11	10	10	10	11	8	8	10
P04919	Band 3 anion transport protein OS=Mus musculus GN=Slc4a1 PE=1 SV=1 - [B3AT_MOUSE]	0.0316479	0.0327851	0.0459608	0.037974	0.0285763	0	0.0464114	0.0518891	0	0.0568859	0.0439318	0.0427719	2	2	3	3	2	0	3	3	0	3	2	2	2	2	2	3	2	0	2	3	0	3	2	2	2	2	2	3	2	0	2	3	0	3	2	2
Q01339	Beta-2-glycoprotein 1 OS=Mus musculus GN=Apoh PE=1 SV=1 - [APOH_MOUSE]	0.0845217	0.131338	0.0818313	0.236639	0.114478	0.122583	0	0.0923865	0	0	0	0	2	3	2	7	3	3	0	2	0	0	0	0	2	2	2	6	3	2	0	2	0	0	0	0	2	2	2	6	3	2	0	2	0	0	0	0
P21550	Beta-enolase OS=Mus musculus GN=Eno3 PE=1 SV=3 - [ENOB_MOUSE]	0	0	0	0	0	0	0	0	0.073807	0	0	0.093807	0	0	0	0	0	0	0	0	2	0	0	2	0	0	0	0	0	0	0	0	2	0	0	1	0	0	0	0	0	0	0	0	2	0	0	2
P08607	C4b-binding protein OS=Mus musculus GN=C4bpa PE=1 SV=3 - [C4BPA_MOUSE]	0.190053	0.098441	0.184003	0.202705	0.171607	0	0.0929038	0	0	0	0	0	6	3	6	8	6	0	3	0	0	0	0	0	5	2	4	5	5	0	3	0	0	0	0	0	5	2	4	5	5	0	3	0	0	0	0	0
Q9JHH6	Carboxypeptidase B2 OS=Mus musculus GN=Cpb2 PE=1 SV=1 - [CBPB2_MOUSE]	0.0667888	0.0691887	0.0969943	0	0.120613	0	0.0652969	0	0	0	0.0927124	0	2	2	3	0	4	0	2	0	0	0	2	0	2	2	2	0	3	0	2	0	0	0	2	0	2	2	2	0	3	0	2	0	0	0	2	0
Q9JJN5	Carboxypeptidase N catalytic chain OS=Mus musculus GN=Cpn1 PE=1 SV=1 - [CBPN_MOUSE]	0.31478	0.326091	0.365712	0.276981	0.312652	0.213048	0.215424	0.309663	0.267777	0.226322	0.349568	0.340339	10	10	12	11	11	7	7	9	8	6	8	8	8	7	9	8	8	7	3	6	6	5	6	7	8	7	9	8	8	7	3	6	6	5	6	7
Q9DBB9	Carboxypeptidase N subunit 2 OS=Mus musculus GN=Cpn2 PE=1 SV=2 - [CPN2_MOUSE]	0.107938	0	0	0	0.0730966	0	0.0791453	0	0	0	0	0.145878	4	0	0	0	3	0	3	0	0	0	0	4	2	0	0	0	2	0	2	0	0	0	0	2	2	0	0	0	2	0	2	0	0	0	0	2
P24270	Catalase OS=Mus musculus GN=Cat PE=1 SV=4 - [CATA_MOUSE]	0	0	0	0	0	0	0	0	0	0.065411	0	0	0	0	0	0	0	0	0	0	0	2	0	0	0	0	0	0	0	0	0	0	0	2	0	0	0	0	0	0	0	0	0	0	0	2	0	0
Q9QWK4	CD5 antigen-like OS=Mus musculus GN=Cd5l PE=1 SV=3 - [CD5L_MOUSE]	1.30185	1.43563	1.38238	1.71324	1.09966	0.730873	0.492683	0.550832	0.714486	0.855491	0.408066	0.454048	31	33	34	51	29	18	12	12	16	17	7	8	16	15	16	17	15	14	8	9	8	8	5	5	16	15	16	17	15	14	8	9	8	8	5	5
P40240	CD9 antigen OS=Mus musculus GN=Cd9 PE=1 SV=2 - [CD9_MOUSE]	0	0	0	0	0	0	0.126346	0	0	0.15486	0	0	0	0	0	0	0	0	2	0	0	2	0	0	0	0	0	0	0	0	2	0	0	2	0	0	0	0	0	0	0	0	2	0	0	2	0	0
Q61147	Ceruloplasmin OS=Mus musculus GN=Cp PE=1 SV=2 - [CERU_MOUSE]	0.0538833	0.0418646	0	0.0215514	0.0364902	0.0651233	0.0658496	0.0736215	0.0859452	0.0645688	0	0	4	3	0	2	3	5	5	5	6	4	0	0	4	2	0	2	2	5	4	4	5	4	0	0	4	2	0	2	2	5	4	4	5	4	0	0
Q06890	Clusterin OS=Mus musculus GN=Clu PE=1 SV=1 - [CLUS_MOUSE]	0.663477	0.52367	0.611769	0.379095	0.570555	0.79424	0.648656	0.794281	0.83989	0.719331	1.00872	1.06748	21	16	20	15	20	26	21	23	25	19	23	25	11	9	11	9	11	15	12	13	13	12	12	15	11	9	12	9	12	15	12	13	13	12	12	15
O88783	Coagulation factor V OS=Mus musculus GN=F5 PE=1 SV=1 - [FA5_MOUSE]	0.105617	0.102574	0.108646	0.14257	0.14901	0.134031	0.129073	0.194813	0.182501	0.126562	0.155775	0.124898	16	15	17	27	25	21	20	27	26	16	17	14	15	12	16	21	20	17	17	20	18	12	13	13	15	12	16	21	20	17	17	20	18	12	13	13
Q91Y47	Coagulation factor XI OS=Mus musculus GN=F11 PE=2 SV=2 - [FA11_MOUSE]	0.140312	0.0969028	0.0679231	0.11224	0.190041	0.0904433	0.045726	0.0766842	0.0497337	0	0.0973869	0	6	4	3	6	9	4	2	3	2	0	3	0	5	3	3	6	8	4	2	3	2	0	2	0	5	3	3	6	8	4	2	3	2	0	2	0
Q80YC5	Coagulation factor XII OS=Mus musculus GN=F12 PE=1 SV=2 - [FA12_MOUSE]	0.173882	0.231596	0.192397	0.119223	0.224294	0.240175	0.121427	0.135758	0.158483	0.148832	0.17241	0.201429	7	9	8	6	10	10	5	5	6	5	5	6	4	5	5	3	5	6	4	4	4	4	4	4	4	5	5	3	5	6	4	4	4	4	4	4
Q8BH61	Coagulation factor XIII A chain OS=Mus musculus GN=F13a1 PE=1 SV=3 - [F13A_MOUSE]	0	0.0406369	0.0379787	0.0627581	0.0708402	0.0568921	0.0767023	0.085755	0.125137	0.094013	0.0816799	0.106031	0	2	2	4	4	3	4	4	6	4	3	4	0	2	2	3	4	2	2	3	4	2	2	3	0	2	2	3	4	2	2	3	4	2	2	3
P98086	Complement C1q subcomponent subunit A OS=Mus musculus GN=C1qa PE=1 SV=2 - [C1QA_MOUSE]	3.33003	3.3846	3.52818	3.56846	3.80109	2.67298	2.45709	2.81576	3.14012	2.10814	2.18045	2.03797	53	52	58	71	67	44	40	41	47	28	25	24	10	9	10	8	9	10	9	10	10	8	9	9	10	9	10	8	9	10	9	10	10	8	9	9
P14106	Complement C1q subcomponent subunit B OS=Mus musculus GN=C1qb PE=1 SV=2 - [C1QB_MOUSE]	0.916254	0.949178	0.82795	1.80791	1.65465	1.35839	1.07495	1.06828	1.16916	1.09796	1.27189	1.0732	15	15	14	37	30	23	18	16	18	15	15	13	6	6	5	9	7	6	6	6	5	5	6	6	6	6	5	9	7	6	6	6	5	5	6	6
Q02105	Complement C1q subcomponent subunit C OS=Mus musculus GN=C1qc PE=1 SV=2 - [C1QC_MOUSE]	1.3186	1.10579	0.972666	0.803643	0.850442	1.03208	1.04359	1.02949	1.00152	1.05339	1.04594	1.27291	21	17	16	16	15	17	17	15	15	14	12	15	7	6	6	7	6	6	6	6	5	5	5	6	7	6	6	7	6	6	6	6	5	5	5	6
Q8CG16	Complement C1r-A subcomponent OS=Mus musculus GN=C1ra PE=1 SV=1 - [C1RA_MOUSE]	1.18213	1.16127	0.868246	0.652153	0.699331	0.867088	0.557938	0.646066	0.715202	0.537316	0.735608	0.578458	58	55	44	40	38	44	28	29	33	22	26	21	26	26	23	23	25	27	18	16	18	15	15	14	26	26	23	23	25	27	18	16	18	15	15	14
Q8CG14	Complement C1s-A subcomponent OS=Mus musculus GN=C1sa PE=2 SV=2 - [CS1A_MOUSE]	1.21036	1.51782	1.21295	0.628482	0.997022	0.862307	0.996485	0.928412	1.15156	0.916034	1.06115	1.00444	57	69	59	37	52	42	48	40	51	36	36	35	11	13	12	19	11	12	11	10	12	8	17	18	23	24	23	19	22	23	21	20	23	18	17	18
Q8CFG8	Complement C1s-B subcomponent OS=Mus musculus GN=C1sb PE=2 SV=1 - [CS1B_MOUSE]	0.510671	0.771488	0.597419	0	0.461107	0.45261	0.561672	0.488415	0.565647	0.484453	0	0	24	35	29	0	24	22	27	21	25	19	0	0	2	2	2	0	1	1	1	1	1	1	0	0	14	13	13	0	12	12	11	11	12	11	0	0
P01027	Complement C3 OS=Mus musculus GN=C3 PE=1 SV=3 - [CO3_MOUSE]	0.437572	0.417032	0.389753	0.658049	0.434614	0.499234	0.564694	0.43046	0.455987	0.492886	0.413041	0.532239	50	46	46	94	55	59	66	45	49	47	34	45	42	37	33	51	42	49	43	35	36	33	26	32	42	37	33	51	42	49	43	35	36	33	26	32
P01029	Complement C4-B OS=Mus musculus GN=C4b PE=1 SV=3 - [CO4B_MOUSE]	0.406064	0.438182	0.483233	0.378959	0.290267	0.417153	0.653385	0.490083	0.46777	0.648787	0.493216	0.400162	48	50	59	56	38	51	79	53	52	64	42	35	27	29	34	30	22	30	40	31	29	37	21	21	27	29	34	30	22	30	40	31	29	37	21	21
P06684	Complement C5 OS=Mus musculus GN=C5 PE=1 SV=2 - [CO5_MOUSE]	0.034562	0.0358039	0.0752892	0.0760295	0.0546132	0.133669	0.253425	0.113334	0.165382	0.165664	0.0839598	0.105098	4	4	9	11	7	16	30	12	18	16	7	9	4	4	7	8	6	13	20	9	11	11	4	4	4	4	7	8	6	13	20	9	11	11	4	4
Q8K182	Complement component C8 alpha chain OS=Mus musculus GN=C8a PE=1 SV=1 - [CO8A_MOUSE]	0.0987905	0.0767552	0.0956459	0.0395126	0.111503	0.191037	0.169022	0.107983	0.157573	0.118381	0.205703	0.200272	4	3	4	2	5	8	7	4	6	4	6	6	3	3	4	2	4	6	5	3	5	3	4	4	3	3	4	2	4	6	5	3	5	3	4	4
Q8BH35	Complement component C8 beta chain OS=Mus musculus GN=C8b PE=1 SV=1 - [CO8B_MOUSE]	0.147853	0.204221	0.238578	0.118272	0.0890019	0.190608	0.313192	0.242416	0.262032	0.147644	0.171034	0.233126	6	8	10	6	4	8	13	9	10	5	5	7	3	4	6	4	4	3	4	3	6	3	3	3	3	4	6	4	4	3	4	3	6	3	3	3
Q8VCG4	Complement component C8 gamma chain OS=Mus musculus GN=C8g PE=1 SV=1 - [CO8G_MOUSE]	0.362538	0.300452	0.280799	0.232004	0.327352	0.701061	0.141776	0.158509	0.231303	0.26066	0.301953	0.293981	5	4	4	4	5	10	2	2	3	3	3	3	3	3	3	3	3	6	2	2	2	2	2	2	3	3	3	3	3	6	2	2	2	2	2	2
P06683	Complement component C9 OS=Mus musculus GN=C9 PE=1 SV=2 - [CO9_MOUSE]	0	0	0	0	0	0.0509003	0.077202	0.0575425	0.0559789	0	0	0	0	0	0	0	0	2	3	2	2	0	0	0	0	0	0	0	0	2	3	2	2	0	0	0	0	0	0	0	0	2	3	2	2	0	0	0
P04186	Complement factor B OS=Mus musculus GN=Cfb PE=1 SV=2 - [CFAB_MOUSE]	0.614369	0.73589	0.594814	0.353231	0.572077	0.612584	0.412944	0.503653	0.571628	0.414115	0.50637	0.518948	32	37	32	23	33	33	22	24	28	18	19	20	22	19	19	15	20	21	17	17	17	14	16	16	22	19	19	15	20	21	17	17	17	14	16	16
P06909	Complement factor H OS=Mus musculus GN=Cfh PE=1 SV=2 - [CFAH_MOUSE]	0.117297	0.133662	0.124919	0.187658	0.16946	0.226823	0.137612	0.0641055	0.0623636	0.0702787	0.0488474	0	10	11	11	20	16	20	12	5	5	5	3	0	8	10	10	17	13	19	8	4	5	3	3	0	8	10	10	17	13	19	8	4	5	3	3	0
P14847	C-reactive protein OS=Mus musculus GN=Crp PE=1 SV=2 - [CRP_MOUSE]	0	0	0	0	0	0.124445	0.18875	0.281369	0.136862	0.154232	0	0	0	0	0	0	0	2	3	4	2	2	0	0	0	0	0	0	0	2	3	3	2	2	0	0	0	0	0	0	0	2	3	3	2	2	0	0
P70194	C-type lectin domain family 4 member F OS=Mus musculus GN=Clec4f PE=1 SV=1 - [CLC4F_MOUSE]	0	0	0	0	0	0	0.052083	0	0	0.0638374	0.0739505	0	0	0	0	0	0	0	2	0	0	2	2	0	0	0	0	0	0	0	2	0	0	2	2	0	0	0	0	0	0	0	2	0	0	2	2	0
Q9R1E6	Ectonucleotide pyrophosphatase/phosphodiesterase family member 2 OS=Mus musculus GN=Enpp2 PE=1 SV=3 - [ENPP2_MOUSE]	0	0	0	0	0	0	0.0322711	0.0360798	0.0350995	0	0.0458204	0	0	0	0	0	0	0	2	2	2	0	2	0	0	0	0	0	0	0	2	2	2	0	2	0	0	0	0	0	0	0	2	2	2	0	2	0
P54116	Erythrocyte band 7 integral membrane protein OS=Mus musculus GN=Stom PE=1 SV=3 - [STOM_MOUSE]	0	0	0	0	0	0	0.152561	0.170567	0	0	0	0	0	0	0	0	0	0	3	3	0	0	0	0	0	0	0	0	0	0	2	2	0	0	0	0	0	0	0	0	0	0	2	2	0	0	0	0
P26040	Ezrin OS=Mus musculus GN=Ezr PE=1 SV=3 - [EZRI_MOUSE]	0	0	0	0	0	0	0	0.179909	0	0	0.195839	0.127112	0	0	0	0	0	0	0	7	0	0	6	4	0	0	0	0	0	0	0	1	0	0	1	1	0	0	0	0	0	0	0	5	0	0	5	4
Q8K1B8	Fermitin family homolog 3 OS=Mus musculus GN=Fermt3 PE=1 SV=1 - [URP2_MOUSE]	0.0431548	0.0447055	0	0.0345208	0.0584496	0.083451	0.0421909	0.141511	0.183555	0.0775692	0.149763	0.116647	2	2	0	2	3	4	2	6	8	3	5	4	2	2	0	2	3	3	2	4	7	2	3	3	2	2	0	2	3	3	2	4	7	2	3	3
P29391	Ferritin light chain 1 OS=Mus musculus GN=Ftl1 PE=1 SV=2 - [FRIL1_MOUSE]	0	0	0.151909	0	0.141675	0.151706	0.306797	0	0	0.188018	0	0	0	0	2	0	2	2	4	0	0	2	0	0	0	0	2	0	2	2	2	0	0	2	0	0	0	0	2	0	2	2	2	0	0	2	0	0
Q8VCM7	Fibrinogen gamma chain OS=Mus musculus GN=Fgg PE=1 SV=1 - [FIBG_MOUSE]	0	0.0684595	0.0639814	0	0.0596709	0	0	0	0	0	0	0	0	2	2	0	2	0	0	0	0	0	0	0	0	2	2	0	2	0	0	0	0	0	0	0	0	2	2	0	2	0	0	0	0	0	0	0
P11276	Fibronectin OS=Mus musculus GN=Fn1 PE=1 SV=4 - [FINC_MOUSE]	0.0179643	0.0186098	0.02319	0.0574807	0.0270347	0.0694773	0.2693	0.0981796	0.0955119	0.0861073	0.0664989	0.0728361	3	3	4	12	5	12	46	15	15	12	8	9	3	3	3	10	5	11	32	13	13	9	8	7	3	3	3	10	5	11	32	13	13	9	8	7
Q8BTM8	Filamin-A OS=Mus musculus GN=Flna PE=1 SV=5 - [FLNA_MOUSE]	0	0	0.0168555	0.0185686	0.0261999	0.044888	0.0737566	0.0634321	0.0678793	0.0625864	0.0483342	0.0627441	0	0	3	4	5	8	13	10	11	9	6	8	0	0	3	3	4	8	9	8	10	7	6	6	0	0	3	3	4	8	9	8	10	7	6	6
P05064	Fructose-bisphosphate aldolase A OS=Mus musculus GN=Aldoa PE=1 SV=2 - [ALDOA_MOUSE]	0.207337	0.214788	0.16059	0	0	0	0	0	0	0	0	0	5	5	4	0	0	0	0	0	0	0	0	0	4	4	4	0	0	0	0	0	0	0	0	0	4	4	4	0	0	0	0	0	0	0	0	0
P13020	Gelsolin OS=Mus musculus GN=Gsn PE=1 SV=3 - [GELS_MOUSE]	0.34181	0.255734	0.25739	0.227853	0.205757	0.440652	0.371306	0.477398	0.464426	0.364084	0.448122	0.590276	18	13	14	15	12	24	20	23	23	16	17	23	12	10	11	9	11	18	16	19	17	13	14	18	12	10	11	9	11	18	16	19	17	13	14	18
Q07235	Glia-derived nexin OS=Mus musculus GN=Serpine2 PE=1 SV=2 - [GDN_MOUSE]	0	0.11473	0.107226	0.0590618	0.133336	0.178471	0.252646	0.363169	0.353301	0.353903	0.409969	0.498931	0	3	3	2	4	5	7	9	9	8	8	10	0	3	3	2	4	5	5	7	7	6	5	6	0	3	3	2	4	5	5	7	7	6	5	6
P06745	Glucose-6-phosphate isomerase OS=Mus musculus GN=Gpi PE=1 SV=4 - [G6PI_MOUSE]	0	0	0	0	0	0.0754194	0.0508404	0.0568408	0.0552963	0.0623144	0.0721863	0.0702804	0	0	0	0	0	3	2	2	2	2	2	2	0	0	0	0	0	2	2	2	2	2	2	2	0	0	0	0	0	2	2	2	2	2	2	2
P16858	Glyceraldehyde-3-phosphate dehydrogenase OS=Mus musculus GN=Gapdh PE=1 SV=2 - [G3P_MOUSE]	0	0	0	0	0.0823017	0.0881292	0	0	0	0	0	0	0	0	0	0	2	2	0	0	0	0	0	0	0	0	0	0	2	2	0	0	0	0	0	0	0	0	0	0	2	2	0	0	0	0	0	0
P01898	H-2 class I histocompatibility antigen, Q10 alpha chain OS=Mus musculus GN=H2-Q10 PE=1 SV=3 - [HA10_MOUSE]	0	0	0	0	0	0.16944	0.0856649	0	0	0	0	0	0	0	0	0	0	4	2	0	0	0	0	0	0	0	0	0	0	2	2	0	0	0	0	0	0	0	0	0	0	2	2	0	0	0	0	0
Q61646	Haptoglobin OS=Mus musculus GN=Hp PE=1 SV=1 - [HPT_MOUSE]	0	0	0.12232	0.0673763	0.152106	0.162877	0.0823466	0.0920655	0.134346	0	0	0.113834	0	0	3	2	4	4	2	2	3	0	0	2	0	0	2	2	4	3	2	2	2	0	0	2	0	0	2	2	4	3	2	2	2	0	0	2
P16627	Heat shock 70 kDa protein 1-like OS=Mus musculus GN=Hspa1l PE=1 SV=4 - [HS71L_MOUSE]	0	0	0	0	0	0.0446771	0	0	0	0	0	0	0	0	0	0	0	2	0	0	0	0	0	0	0	0	0	0	0	1	0	0	0	0	0	0	0	0	0	0	0	2	0	0	0	0	0	0
P63017	Heat shock cognate 71 kDa protein OS=Mus musculus GN=Hspa8 PE=1 SV=1 - [HSP7C_MOUSE]	0.0690823	0.0954195	0	0.128942	0.08317	0.0890589	0.0900523	0.125851	0	0	0.191792	0	3	4	0	7	4	4	4	5	0	0	6	0	3	4	0	6	4	3	4	5	0	0	5	0	3	4	0	6	4	4	4	5	0	0	5	0
P17156	Heat shock-related 70 kDa protein 2 OS=Mus musculus GN=Hspa2 PE=1 SV=2 - [HSP72_MOUSE]	0	0	0.068064	0	0	0	0	0	0.0747553	0.168486	0	0.0950124	0	0	3	0	0	0	0	0	3	6	0	3	0	0	3	0	0	0	0	0	3	5	0	3	0	0	3	0	0	0	0	0	3	5	0	3
P01942	Hemoglobin subunit alpha OS=Mus musculus GN=Hba PE=1 SV=2 - [HBA_MOUSE]	0.324555	0.336217	0.314224	0.4327	0.39074	0.209203	0.63461	0.591258	0.575192	0.777833	0.450529	0.877267	3	3	3	5	4	2	6	5	5	6	3	6	2	2	2	4	2	2	4	3	4	4	2	4	2	2	2	4	2	2	4	3	4	4	2	4
P02088	Hemoglobin subunit beta-1 OS=Mus musculus GN=Hbb-b1 PE=1 SV=2 - [HBB1_MOUSE]	0.515147	0.533657	0.498749	0.576912	0.837267	0.498084	0.705096	0.90093	1.31467	1.11115	1.00114	1.11395	5	5	5	7	9	5	7	8	12	9	7	8	3	3	3	5	6	4	4	4	6	4	3	3	3	3	3	5	6	4	5	5	6	5	4	4
P02089	Hemoglobin subunit beta-2 OS=Mus musculus GN=Hbb-b2 PE=1 SV=2 - [HBB2_MOUSE]	0	0	0	0	0	0	0.401944	0.337037	0	0.369493	0.570704	0.416727	0	0	0	0	0	0	4	3	0	3	4	3	0	0	0	0	0	0	1	1	0	1	1	1	0	0	0	0	0	0	2	2	0	2	2	2
Q91X72	Hemopexin OS=Mus musculus GN=Hpx PE=1 SV=2 - [HEMO_MOUSE]	0	0	0	0.0508785	0.0574308	0.153743	0.155458	0.208567	0.169083	0.0762171	0.220729	0	0	0	0	2	2	5	5	6	5	2	5	0	0	0	0	2	2	3	5	5	3	2	3	0	0	0	0	2	2	3	5	5	3	2	3	0
P49182	Heparin cofactor 2 OS=Mus musculus GN=Serpind1 PE=1 SV=1 - [HEP2_MOUSE]	0	0	0	0	0	0	0	0.065467	0.0636881	0.107657	0	0	0	0	0	0	0	0	0	2	2	3	0	0	0	0	0	0	0	0	0	2	2	2	0	0	0	0	0	0	0	0	0	2	2	2	0	0
Q9ESB3	Histidine-rich glycoprotein OS=Mus musculus GN=Hrg PE=1 SV=2 - [HRG_MOUSE]	5.46179	4.82935	4.56686	4.08218	5.13095	3.30722	2.21143	2.95486	2.17059	2.21469	2.87188	2.64693	198	169	171	185	206	124	82	98	74	67	75	71	31	31	30	29	31	26	24	26	25	26	25	25	31	31	30	29	31	26	24	26	25	26	25	25
Q9JKR6	Hypoxia up-regulated protein 1 OS=Mus musculus GN=Hyou1 PE=1 SV=1 - [HYOU1_MOUSE]	0	0	0	0	0	0	0	0	0.0312169	0	0.040752	0	0	0	0	0	0	0	0	0	2	0	2	0	0	0	0	0	0	0	0	0	2	0	2	0	0	0	0	0	0	0	0	0	2	0	2	0
P01878	Ig alpha chain C region OS=Mus musculus PE=1 SV=1 - [IGHA_MOUSE]	1.10642	1.23788	1.11405	1.16828	1.27877	1.28373	1.42786	1.40288	1.36476	2.22741	1.53588	1.79439	25	27	26	33	32	30	33	29	29	42	25	30	10	10	10	9	12	12	11	12	11	11	9	11	10	10	10	9	12	12	11	12	11	11	9	11
P01868	Ig gamma-1 chain C region secreted form OS=Mus musculus GN=Ighg1 PE=1 SV=1 - [IGHG1_MOUSE]	0.639923	0.568215	0.619554	0.731274	0.742905	0.751312	0.715004	0.699468	0.534649	0.931145	0.888305	0.741302	14	12	14	20	18	17	16	14	11	17	14	12	9	9	8	9	10	10	6	6	6	6	5	6	9	9	8	9	10	10	6	6	6	6	5	6
P01864	Ig gamma-2A chain C region secreted form OS=Mus musculus PE=1 SV=1 - [GCAB_MOUSE]	1.73922	2.1713	1.98609	2.28308	2.13416	1.89721	1.48238	1.70608	1.42262	1.87037	1.60953	2.23001	39	47	46	64	53	44	34	35	30	35	26	37	8	6	7	7	8	8	7	6	8	6	4	5	11	9	10	10	11	11	10	9	11	9	7	8
P01863	Ig gamma-2A chain C region, A allele OS=Mus musculus GN=Ighg PE=1 SV=1 - [GCAA_MOUSE]	2.06303	2.46238	2.56184	1.72203	1.8628	2.08143	1.35925	1.56869	0.810724	1.3973	1.18287	1.9396	46	53	59	48	46	48	31	32	17	26	19	32	6	6	6	7	6	7	6	5	4	6	4	5	9	9	9	10	9	10	9	9	7	9	7	8
P01867	Ig gamma-2B chain C region OS=Mus musculus GN=Igh-3 PE=1 SV=3 - [IGG2B_MOUSE]	0.958717	0.916769	1.2495	0.825897	1.03214	0.713049	0.612851	0.604573	0.705774	0.618606	0.460675	0.64785	26	24	35	28	31	20	17	15	18	14	9	13	11	14	13	13	12	10	7	7	9	6	5	6	11	14	13	13	12	10	7	7	9	6	5	6
P03987	Ig gamma-3 chain C region OS=Mus musculus PE=1 SV=2 - [IGHG3_MOUSE]	1.59749	1.00063	0.827271	2.46659	1.61017	0.898009	0.835383	1.25884	0.987608	0.801327	1.13456	0.652719	43	26	23	83	48	25	23	31	25	18	22	13	16	15	15	15	17	15	13	16	13	10	12	7	16	15	15	15	17	15	13	16	13	10	12	7
P84751	Ig heavy chain Mem5 (Fragment) OS=Mus musculus PE=1 SV=1 - [HVM63_MOUSE]	0	0	0	0	0	0	0	0.77408	0.54767	0.61718	0.625584	1.30514	0	0	0	0	0	0	0	11	8	8	7	15	0	0	0	0	0	0	0	1	1	1	1	1	0	0	0	0	0	0	0	4	3	3	3	3
P01750	Ig heavy chain V region 102 OS=Mus musculus PE=1 SV=1 - [HVM06_MOUSE]	1.26841	1.18259	1.10523	1.01464	1.25984	0.981121	0.744048	0.970507	1.21389	0.91197	0.704296	0.857126	10	9	9	10	11	8	6	7	9	6	4	5	1	1	2	1	2	2	1	1	1	2	1	1	3	3	4	3	4	4	3	3	3	4	3	3
P01753	Ig heavy chain V region 186-1 OS=Mus musculus PE=4 SV=2 - [HVM09_MOUSE]	1.13953	1.04932	0.980677	1.11411	0.800283	0.856948	0.74272	0.968775	1.07709	1.06207	0.878799	0.855596	9	8	8	11	7	7	6	7	8	7	5	5	1	1	1	2	1	2	2	2	1	2	2	1	2	2	2	3	2	3	3	3	2	3	3	2
P01749	Ig heavy chain V region 3 OS=Mus musculus GN=Ighv1-61 PE=1 SV=1 - [HVM05_MOUSE]	0.250777	0.389682	0.485589	0.501508	0.792531	0.727412	0.490351	0.548224	0.399995	0.601016	0.522172	0.508385	2	3	4	5	7	6	4	4	3	4	3	3	2	2	3	3	4	3	4	3	3	4	3	3	2	2	3	3	4	3	4	3	3	4	3	3
P18531	Ig heavy chain V region 3-6 OS=Mus musculus GN=Ighv3-6 PE=1 SV=1 - [HVM60_MOUSE]	0.373887	0	0.361986	0.299083	0.450133	0.482005	0.731072	0.953582	0.795146	1.04541	0.865016	0.842178	3	0	3	3	4	4	6	7	6	7	5	5	2	0	2	2	2	2	4	4	4	4	3	3	2	0	2	2	2	2	4	4	4	4	3	3
P01747	Ig heavy chain V region 36-65 OS=Mus musculus PE=1 SV=1 - [HVM03_MOUSE]	0.613219	0.381152	0.5937	0.588637	0.553702	0.355745	0	0.402167	0.521653	0.734825	0.510742	0	5	3	5	6	5	3	0	3	4	5	3	0	3	3	3	3	4	2	0	2	3	3	1	0	4	3	4	4	5	3	0	2	3	3	2	0
P01806	Ig heavy chain V region 441 OS=Mus musculus PE=4 SV=1 - [HVM36_MOUSE]	0.758441	0.785694	1.10145	0.80893	0.798968	0.97776	0.494333	0.414507	0.806488	0.908846	0.877354	0.85419	6	6	9	8	7	8	4	3	6	6	5	5	2	2	2	2	2	2	1	1	2	2	4	2	5	5	6	5	5	6	4	3	4	5	4	4
P18525	Ig heavy chain V region 5-84 OS=Mus musculus PE=1 SV=1 - [HVM54_MOUSE]	0.380372	0.919428	0	0.709964	0	0	0	0	0	0	0	0	3	7	0	7	0	0	0	0	0	0	0	0	1	1	0	1	0	0	0	0	0	0	0	0	3	4	0	4	0	0	0	0	0	0	0	0
P18528	Ig heavy chain V region 6.96 OS=Mus musculus PE=4 SV=1 - [HVM57_MOUSE]	0	0	0	1.06742	0	1.00349	0	0.972372	0.94595	1.24368	0	0.801521	0	0	0	9	0	7	0	6	6	7	0	4	0	0	0	1	0	1	0	1	1	1	0	1	0	0	0	3	0	4	0	3	3	3	0	3
P18527	Ig heavy chain V region 914 OS=Mus musculus PE=1 SV=1 - [HVM56_MOUSE]	1.07157	1.58582	1.48209	1.95926	1.79691	1.77613	1.19729	1.67326	1.79057	1.83439	1.91249	1.24133	7	10	10	16	13	12	8	10	11	10	9	6	3	3	3	3	3	3	3	3	3	3	3	2	4	5	5	5	5	5	4	5	5	5	4	5
P06330	Ig heavy chain V region AC38 205.12 OS=Mus musculus PE=1 SV=1 - [HVM51_MOUSE]	2.52351	2.09135	1.95455	1.71583	2.39252	1.82995	2.22043	2.06874	1.87836	2.26796	1.7515	2.55788	20	16	16	17	21	15	18	15	14	15	10	15	4	4	4	5	5	4	5	4	5	6	2	5	6	6	6	7	7	7	8	7	8	7	5	6
P01810	Ig heavy chain V region J539 OS=Mus musculus PE=1 SV=1 - [HVM40_MOUSE]	0.739581	0.638464	0.95472	0.591612	0.556501	0.834266	0.602551	0.538933	0.655361	0.738539	0	0.66636	6	5	8	6	5	7	5	4	5	5	0	4	1	1	1	1	1	1	1	1	1	1	0	1	4	4	5	4	4	5	4	3	3	4	0	3
P01790	Ig heavy chain V region M511 OS=Mus musculus PE=1 SV=1 - [HVM21_MOUSE]	0	0.619181	0.694414	0.669368	0.755571	0.693488	1.16871	0.914649	1.01691	1.14597	1.16158	0.969352	0	5	6	7	7	6	10	7	8	8	7	6	0	4	4	4	5	4	4	5	4	5	5	4	0	4	5	5	5	5	5	5	5	6	6	5
P01789	Ig heavy chain V region M603 OS=Mus musculus PE=1 SV=1 - [HVM20_MOUSE]	0.598842	0	0	0	0	0	0	0	0	0	0	0	5	0	0	0	0	0	0	0	0	0	0	0	3	0	0	0	0	0	0	0	0	0	0	0	3	0	0	0	0	0	0	0	0	0	0	0
P01821	Ig heavy chain V region MC101 OS=Mus musculus PE=1 SV=1 - [HVM45_MOUSE]	0.647964	0.805497	0.752807	0.518325	0.936121	0.375902	0.506792	0.708258	0.689013	0.310584	0.359787	0.525432	5	6	6	5	8	3	4	5	5	2	2	3	3	3	3	2	4	1	1	1	1	1	1	1	4	4	4	3	5	2	2	2	2	2	2	2
P01756	Ig heavy chain V region MOPC 104E OS=Mus musculus PE=1 SV=1 - [HVM12_MOUSE]	1.38269	0.781297	0.973587	0.904954	1.47549	1.3369	1.22892	1.23656	1.20296	0	1.22142	0	11	6	8	9	13	11	10	9	9	0	7	0	2	2	1	2	2	2	1	1	2	0	1	0	4	4	3	4	4	5	4	4	5	0	4	0
P01783	Ig heavy chain V region MOPC 21 (Fragment) OS=Mus musculus PE=1 SV=1 - [HVM16_MOUSE]	0.216576	0.560895	0.314523	0.34649	0.391112	0.523506	0.317607	0.473457	0.690888	0.778574	0.450958	0.439052	2	5	3	4	4	5	3	4	6	6	3	3	1	1	1	1	1	1	1	1	1	1	1	1	2	3	3	3	3	3	2	3	3	3	2	3
P01786	Ig heavy chain V region MOPC 47A OS=Mus musculus PE=1 SV=1 - [HVM17_MOUSE]	0	0.390898	0.365328	0.503073	0.454288	0.486455	0.614851	0.549934	0.802487	0.904338	1.0476	0.679962	0	3	3	5	4	4	5	4	6	6	6	4	0	1	1	1	1	2	1	1	1	1	1	1	0	2	3	3	2	4	3	2	3	3	3	3
P01820	Ig heavy chain V region PJ14 OS=Mus musculus PE=1 SV=1 - [HVM44_MOUSE]	0.655574	0.679131	0.634707	0.41953	0.710336	0.380316	0.512744	0.573261	0.418263	0.471348	0.728025	0.886005	5	5	5	4	6	3	4	4	3	3	4	5	2	2	2	2	2	2	2	2	1	1	2	2	3	3	3	3	3	3	3	3	2	2	3	3
P18524	Ig heavy chain V region RF OS=Mus musculus PE=1 SV=1 - [HVM53_MOUSE]	0	0	0.245621	0.811755	0.572684	0.36794	0.496059	0.554606	0.404652	0.45601	0.528251	0.342869	0	0	2	8	5	3	4	4	3	3	3	2	0	0	1	2	1	1	2	1	1	1	1	1	0	0	2	3	3	3	3	2	2	2	2	2
P06327	Ig heavy chain V region VH558 A1/A4 OS=Mus musculus GN=Gm5629 PE=2 SV=1 - [HVM52_MOUSE]	0.377467	0.521374	0.243635	0.201298	0.227221	0.364965	0.369035	0.41259	0.535172	0.603096	0.523979	0.340096	3	4	2	2	2	3	3	3	4	4	3	2	2	2	2	2	2	2	2	2	2	2	2	2	2	2	2	2	2	2	2	2	2	2	2	2
P01796	Ig heavy chain V-III region A4 OS=Mus musculus PE=1 SV=1 - [HVM27_MOUSE]	0	0	0	0	0	0	0	0	0	0	1.60859	0.870064	0	0	0	0	0	0	0	0	0	0	9	5	0	0	0	0	0	0	0	0	0	0	4	4	0	0	0	0	0	0	0	0	0	0	5	5
P01801	Ig heavy chain V-III region J606 OS=Mus musculus PE=1 SV=1 - [HVM32_MOUSE]	1.01918	1.18778	0.98674	0.91718	1.15033	1.23178	1.99283	1.39252	1.35468	1.06863	0	0	8	9	8	9	10	10	16	10	10	7	0	0	5	5	5	5	6	7	7	5	7	4	0	0	5	6	6	6	7	8	8	6	8	5	0	0
P01837	Ig kappa chain C region OS=Mus musculus PE=1 SV=1 - [IGKC_MOUSE]	6.51249	5.59816	8.71994	9.53231	5.00461	5.62691	7.04436	4.99808	5.74632	4.64917	7.30915	5.99257	47	39	65	86	40	42	52	33	39	28	38	32	9	9	10	9	8	8	8	8	8	7	8	8	9	9	10	9	8	8	8	8	8	7	8	8
P84750	Ig kappa chain V region Mem5 (Fragment) OS=Mus musculus PE=1 SV=1 - [KVM5_MOUSE]	0	0	0	0	0	0	0.240821	0	0.261927	0	0	0	0	0	0	0	0	0	2	0	2	0	0	0	0	0	0	0	0	0	2	0	2	0	0	0	0	0	0	0	0	0	2	0	2	0	0	0
P01633	Ig kappa chain V19-17 OS=Mus musculus GN=Igk-V19-17 PE=1 SV=1 - [KV5A1_MOUSE]	0.29793	0.617272	0.384596	0.397205	0.358686	0.288063	0.485459	0.651306	0.422406	0	0	0	3	6	4	5	4	3	5	6	4	0	0	0	2	2	2	2	2	2	2	2	2	0	0	0	2	2	2	2	2	2	2	2	2	0	0	0
P01632	Ig kappa chain V-I region S107A OS=Mus musculus GN=Igkv7-33 PE=2 SV=1 - [KV1A1_MOUSE]	0	0	0.248485	0	0	0	0	0	0	0	0	0	0	0	2	0	0	0	0	0	0	0	0	0	0	0	1	0	0	0	0	0	0	0	0	0	0	0	2	0	0	0	0	0	0	0	0	0
P01631	Ig kappa chain V-II region 26-10 OS=Mus musculus PE=1 SV=1 - [KV2A7_MOUSE]	1.32975	1.37753	0.901197	1.0637	0.840484	1.54285	1.17004	1.30814	1.55539	1.27476	1.29212	1.43772	10	10	7	10	7	12	9	9	11	8	7	8	4	4	4	4	4	4	4	3	4	3	3	4	4	4	4	4	4	4	4	3	4	3	3	4
P01629	Ig kappa chain V-II region 2S1.3 OS=Mus musculus PE=1 SV=1 - [KV2A4_MOUSE]	0	0	0	0	0	0	0.52224	0	0.284006	0.640103	0.556131	0	0	0	0	0	0	0	4	0	2	4	3	0	0	0	0	0	0	0	2	0	2	2	2	0	0	0	0	0	0	0	2	0	2	2	2	0
P01630	Ig kappa chain V-II region 7S34.1 OS=Mus musculus PE=1 SV=1 - [KV2A6_MOUSE]	0	0	0	0.417885	0.353776	0.378826	0.383051	0.285507	0.416623	0.626001	0.362586	0.353013	0	0	0	4	3	3	3	2	3	4	2	2	0	0	0	2	3	2	3	2	2	3	2	2	0	0	0	2	3	2	3	2	2	3	2	2
P01628	Ig kappa chain V-II region MOPC 511 OS=Mus musculus PE=1 SV=1 - [KV2A3_MOUSE]	0	0	0.379326	0.313409	0.471694	0.37882	0.638409	0.428254	0.277745	0.469494	0.543871	0.529511	0	0	3	3	4	3	5	3	2	3	3	3	0	0	1	1	1	2	2	2	2	2	2	2	0	0	3	3	3	2	2	2	2	2	2	2
P01627	Ig kappa chain V-II region VKappa167 OS=Mus musculus GN=Gm5153 PE=4 SV=1 - [KV2A2_MOUSE]	0	0	0.23796	0.196609	0.221929	0	0	0	0	0	0	0	0	0	2	2	2	0	0	0	0	0	0	0	0	0	1	1	1	0	0	0	0	0	0	0	0	0	2	2	2	0	0	0	0	0	0	0
P03977	Ig kappa chain V-III region 50S10.1 OS=Mus musculus PE=1 SV=1 - [KV3A4_MOUSE]	0	0	0	0	0	0	0.794963	0.888788	0	0	0	1.28209	0	0	0	0	0	0	6	6	0	0	0	7	0	0	0	0	0	0	1	1	0	0	0	1	0	0	0	0	0	0	3	2	0	0	0	2
P01662	Ig kappa chain V-III region ABPC 22/PC 9245 OS=Mus musculus PE=1 SV=1 - [KV3AA_MOUSE]	0	0	0	0	0	0	0.530017	0.296286	0	0.649635	0.376275	0.366341	0	0	0	0	0	0	4	2	0	4	2	2	0	0	0	0	0	0	2	2	0	2	2	2	0	0	0	0	0	0	2	2	0	2	2	2
P01654	Ig kappa chain V-III region PC 2880/PC 1229 OS=Mus musculus PE=1 SV=1 - [KV3A1_MOUSE]	0.681114	0.705588	0.923207	0.762779	0.615008	0.395133	0.93226	0.89339	1.30367	1.46913	1.13458	1.47283	5	5	7	7	5	3	7	6	9	9	6	8	1	1	1	1	1	1	2	2	3	3	2	2	2	2	2	2	2	2	4	3	4	4	3	3
P01660	Ig kappa chain V-III region PC 3741/TEPC 111 OS=Mus musculus PE=1 SV=1 - [KV3A8_MOUSE]	0	0.698638	0.783526	0	0.60895	0.391241	0	0	0	0	0	0	0	5	6	0	5	3	0	0	0	0	0	0	0	1	1	0	1	1	0	0	0	0	0	0	0	2	2	0	2	2	0	0	0	0	0	0
P01670	Ig kappa chain V-III region PC 6684 OS=Mus musculus PE=1 SV=1 - [KV3AI_MOUSE]	0	0	0	2.49394	1.95834	0	0	0	1.58554	0	0	0	0	0	0	23	16	0	0	0	11	0	0	0	0	0	0	2	1	0	0	0	1	0	0	0	0	0	0	5	4	0	0	0	3	0	0	0
P01671	Ig kappa chain V-III region PC 7175 OS=Mus musculus PE=1 SV=1 - [KV3AJ_MOUSE]	0.95116	0.985338	1.31555	0	0	0.788277	0	0	0	0	0	0	7	7	10	0	0	6	0	0	0	0	0	0	2	2	2	0	0	2	0	0	0	0	0	0	4	4	4	0	0	4	0	0	0	0	0	0
P01668	Ig kappa chain V-III region PC 7210 OS=Mus musculus PE=1 SV=1 - [KV3AG_MOUSE]	0	0	0	0	0	0	0.667577	0.89564	1.16174	1.14554	0.758292	1.47654	0	0	0	0	0	0	5	6	8	7	4	8	0	0	0	0	0	0	1	1	1	1	1	1	0	0	0	0	0	0	2	2	2	2	2	2
P01672	Ig kappa chain V-III region PC 7940 OS=Mus musculus PE=1 SV=1 - [KV3AK_MOUSE]	1.08451	1.26391	1.31249	1.40973	0.979251	0.786442	0	0	0	0	0	0	8	9	10	13	8	6	0	0	0	0	0	0	2	2	2	2	2	2	0	0	0	0	0	0	4	4	4	4	4	4	0	0	0	0	0	0
P01647	Ig kappa chain V-V region HP 124E1 OS=Mus musculus PE=1 SV=1 - [KV5AE_MOUSE]	0	0	0	0	0	0	1.60015	0.894501	1.88542	1.96128	0	1.659	0	0	0	0	0	0	12	6	13	12	0	9	0	0	0	0	0	0	1	1	1	1	0	1	0	0	0	0	0	0	4	4	4	4	0	4
P01644	Ig kappa chain V-V region HP R16.7 OS=Mus musculus PE=1 SV=1 - [KV5AB_MOUSE]	2.19237	1.98726	2.25525	3.17865	2.10331	2.11976	2.27736	1.19819	2.33126	2.29875	1.71187	1.85186	16	14	17	29	17	16	17	8	16	14	9	10	6	6	5	5	4	4	1	1	1	1	4	1	6	6	5	6	5	4	4	4	4	4	4	4
P01635	Ig kappa chain V-V region K2 (Fragment) OS=Mus musculus PE=1 SV=1 - [KV5A3_MOUSE]	0.908022	0.940649	0.879119	0.622587	1.17128	1.12879	1.39502	1.70145	1.24141	1.55441	1.26046	1.05187	7	7	7	6	10	9	11	12	9	10	7	6	4	4	4	4	4	4	4	4	3	3	3	4	4	4	4	4	4	4	4	4	3	3	3	4
P01638	Ig kappa chain V-V region L6 (Fragment) OS=Mus musculus PE=4 SV=1 - [KV5A6_MOUSE]	0.754067	1.04155	0.973419	0.804265	0.68088	0.729091	0.982964	1.23635	1.06912	1.05421	1.39567	1.01912	6	8	8	8	6	6	8	9	8	7	8	6	1	2	2	2	2	1	2	2	2	2	2	2	2	2	2	2	2	2	2	2	2	2	2	2
P01642	Ig kappa chain V-V region L7 (Fragment) OS=Mus musculus GN=Gm10881 PE=1 SV=1 - [KV5A9_MOUSE]	0	0	0.2505	0	0.233624	0	0.379434	0.424216	0.550252	0.465067	0.897905	0.524519	0	0	2	0	2	0	3	3	4	3	5	3	0	0	2	0	2	0	2	2	2	2	3	2	0	0	2	0	2	0	2	2	2	2	3	2
P01636	Ig kappa chain V-V region MOPC 149 OS=Mus musculus PE=1 SV=1 - [KV5A4_MOUSE]	0.406966	0.843178	0.788024	0.434058	0.489956	0.655811	0.663126	1.03795	1.44249	1.1379	1.31816	1.28336	3	6	6	4	4	5	5	7	10	7	7	7	2	2	2	2	2	2	2	2	2	2	2	2	2	2	2	2	2	2	2	2	2	2	2	2
P01634	Ig kappa chain V-V region MOPC 21 OS=Mus musculus PE=1 SV=1 - [KV5A2_MOUSE]	0	0	0.848258	0	0	0	0	0	0	0	0	0	0	0	8	0	0	0	0	0	0	0	0	0	0	0	1	0	0	0	0	0	0	0	0	0	0	0	2	0	0	0	0	0	0	0	0	0
P01639	Ig kappa chain V-V region MOPC 41 OS=Mus musculus GN=Gm5571 PE=1 SV=1 - [KV5A7_MOUSE]	0.684225	0.590676	0.662446	0.273665	0.411878	0.992344	1.44937	1.24649	0.848832	1.22987	1.58301	1.69533	6	5	6	3	4	9	13	10	7	9	10	11	5	4	5	3	3	5	6	5	4	6	5	5	5	4	5	3	3	5	6	5	4	6	5	5
P01637	Ig kappa chain V-V region T1 OS=Mus musculus PE=4 SV=1 - [KV5A5_MOUSE]	0.226898	0	0	0	0	0.329074	0	0	0	0	0	0	2	0	0	0	0	3	0	0	0	0	0	0	1	0	0	0	0	1	0	0	0	0	0	0	2	0	0	0	0	2	0	0	0	0	0	0
P04940	Ig kappa chain V-VI region NQ2-17.4.1 OS=Mus musculus PE=2 SV=1 - [KV6A6_MOUSE]	0	0	0.683361	0.564611	0.509858	0	0.414037	0	0	0	0	0	0	0	5	5	4	0	3	0	0	0	0	0	0	0	2	2	2	0	2	0	0	0	0	0	0	0	2	2	2	0	2	0	0	0	0	0
P04942	Ig kappa chain V-VI region NQ5-61.1.2 OS=Mus musculus PE=2 SV=1 - [KV6A8_MOUSE]	0.843781	0.8741	0	0	0	0.679861	0	0	0	0	0	0	6	6	0	0	0	5	0	0	0	0	0	0	3	3	0	0	0	3	0	0	0	0	0	0	3	3	0	0	0	3	0	0	0	0	0	0
P01675	Ig kappa chain V-VI region XRPC 44 OS=Mus musculus PE=1 SV=1 - [KV6A1_MOUSE]	0.421087	0.436217	0	0.336839	0.380218	0.40714	0.411681	0.460269	0.447762	0.840986	0.584529	0.569096	3	3	0	3	3	3	3	3	3	5	3	3	2	2	0	2	2	2	2	2	2	2	2	2	2	2	0	2	2	2	2	2	2	2	2	2
P01843	Ig lambda-1 chain C region OS=Mus musculus PE=1 SV=1 - [LAC1_MOUSE]	1.26896	0.87637	1.09206	1.01507	0.636555	1.49958	1.10277	1.23292	0.749637	1.5206	0.97861	0.952772	9	6	8	9	5	11	8	8	5	9	5	5	3	3	3	4	3	3	5	4	3	3	3	3	3	3	3	4	3	3	5	4	3	3	3	3
P01723	Ig lambda-1 chain V region OS=Mus musculus PE=1 SV=2 - [LV1A_MOUSE]	0	0	0	0	0	0	0.391646	0	0	0	0	0	0	0	0	0	0	0	3	0	0	0	0	0	0	0	0	0	0	0	2	0	0	0	0	0	0	0	0	0	0	0	2	0	0	0	0	0
P01844	Ig lambda-2 chain C region OS=Mus musculus GN=Iglc2 PE=1 SV=1 - [LAC2_MOUSE]	1.8851	1.80261	1.6847	2.20391	1.70214	1.82266	1.55945	1.4265	1.23355	1.73764	1.61033	1.56781	13	12	12	19	13	13	11	9	8	10	8	8	6	6	6	6	6	6	6	5	4	7	5	4	6	6	6	6	6	6	6	5	4	7	5	4
P01872	Ig mu chain C region OS=Mus musculus GN=Ighm PE=1 SV=2 - [IGHM_MOUSE]	9.50359	9.06695	8.66357	7.96793	8.19786	6.0943	5.58756	5.2832	4.79237	4.10916	4.17078	4.06066	291	268	274	305	278	193	175	148	138	105	92	92	26	28	28	27	29	28	26	27	24	23	23	26	26	28	28	27	29	28	26	27	24	23	23	26
P01592	Immunoglobulin J chain OS=Mus musculus GN=Jchain PE=1 SV=4 - [IGJ_MOUSE]	0.724804	0.93856	0.701733	0.507317	0.327229	0.437998	0.26573	0.396123	0	0	0	0	8	10	8	7	4	5	3	4	0	0	0	0	5	6	5	4	3	5	2	2	0	0	0	0	5	6	5	4	3	5	2	2	0	0	0	0
Q9DBD0	Inhibitor of carbonic anhydrase OS=Mus musculus GN=Ica PE=1 SV=1 - [ICA_MOUSE]	0	0	0	0.0340129	0	0	0	0	0	0	0	0	0	0	0	2	0	0	0	0	0	0	0	0	0	0	0	1	0	0	0	0	0	0	0	0	0	0	0	2	0	0	0	0	0	0	0	0
P70389	Insulin-like growth factor-binding protein complex acid labile subunit OS=Mus musculus GN=Igfals PE=1 SV=1 - [ALS_MOUSE]	0	0	0	0	0.0440144	0.0942617	0.0476565	0.0799217	0.103667	0.058412	0.0676656	0.0658791	0	0	0	0	2	4	2	3	4	2	2	2	0	0	0	0	2	2	2	3	3	2	2	2	0	0	0	0	2	2	2	3	3	2	2	2
Q9QUM0	Integrin alpha-IIb OS=Mus musculus GN=Itga2b PE=1 SV=2 - [ITA2B_MOUSE]	0	0	0	0	0.0523119	0.0420119	0.0566407	0.0474942	0.0770062	0.0867797	0.0402109	0.0782985	0	0	0	0	4	3	4	3	5	5	2	4	0	0	0	0	3	2	3	3	4	4	2	3	0	0	0	0	3	2	3	3	4	4	2	3
O54890	Integrin beta-3 OS=Mus musculus GN=Itgb3 PE=1 SV=2 - [ITB3_MOUSE]	0	0	0	0.0301024	0	0	0	0	0	0	0	0	0	0	0	2	0	0	0	0	0	0	0	0	0	0	0	2	0	0	0	0	0	0	0	0	0	0	0	2	0	0	0	0	0	0	0	0
A6X935	Inter alpha-trypsin inhibitor, heavy chain 4 OS=Mus musculus GN=Itih4 PE=1 SV=2 - [ITIH4_MOUSE]	0.218307	0.161537	0.211358	0.149683	0.225279	0.452306	0.426861	0.323842	0.447692	0.448455	0.497854	0.463635	14	10	14	12	16	30	28	19	27	24	23	22	8	6	8	7	8	16	15	13	16	14	12	15	8	6	8	7	8	16	15	13	16	14	12	15
Q61702	Inter-alpha-trypsin inhibitor heavy chain H1 OS=Mus musculus GN=Itih1 PE=1 SV=2 - [ITIH1_MOUSE]	0.0645903	0.133822	0.125069	0.0904182	0.174964	0.296642	0.173656	0.229451	0.274728	0.135448	0.201736	0.240057	4	8	8	7	12	19	11	13	16	7	9	11	3	6	8	5	11	14	9	10	12	6	7	8	3	6	8	5	11	14	9	10	12	6	7	8
Q61703	Inter-alpha-trypsin inhibitor heavy chain H2 OS=Mus musculus GN=Itih2 PE=1 SV=1 - [ITIH2_MOUSE]	0.13866	0.127682	0.104414	0.0492968	0.0973794	0.238342	0.1205	0.101041	0.262122	0.0738477	0.106933	0.166576	9	8	7	4	7	16	8	6	16	4	5	8	8	6	6	4	6	11	8	6	11	3	4	6	8	6	6	4	6	11	8	6	11	3	4	6
Q61704	Inter-alpha-trypsin inhibitor heavy chain H3 OS=Mus musculus GN=Itih3 PE=1 SV=3 - [ITIH3_MOUSE]	0.0328508	0.0340312	0.0318051	0.0262782	0.0444936	0	0.032117	0	0	0	0	0	2	2	2	2	3	0	2	0	0	0	0	0	2	2	2	2	2	0	2	0	0	0	0	0	2	2	2	2	2	0	2	0	0	0	0	0
O88844	Isocitrate dehydrogenase [NADP] cytoplasmic OS=Mus musculus GN=Idh1 PE=1 SV=2 - [IDHC_MOUSE]	0.069932	0.0724448	0.169265	0	0.094717	0.135231	0	0.152878	0.148724	0	0.194151	0.236282	2	2	5	0	3	4	0	4	4	0	4	5	2	2	3	0	3	4	0	4	3	0	4	4	2	2	3	0	3	4	0	4	3	0	4	4
P02535	Keratin, type I cytoskeletal 10 OS=Mus musculus GN=Krt10 PE=1 SV=3 - [K1C10_MOUSE]	0	0	0.0547	0	0.0510149	0	0.138091	0.0926334	0.0901163	0.0677025	0	0	0	0	2	0	2	0	5	3	3	2	0	0	0	0	2	0	1	0	4	1	1	1	0	0	0	0	2	0	2	0	5	2	3	2	0	0
P08730	Keratin, type I cytoskeletal 13 OS=Mus musculus GN=Krt13 PE=1 SV=2 - [K1C13_MOUSE]	0	0	0	0	0	0	0	0	0.109019	0	0.0948792	0	0	0	0	0	0	0	0	0	3	0	2	0	0	0	0	0	0	0	0	0	1	0	2	0	0	0	0	0	0	0	0	0	2	0	2	0
Q61781	Keratin, type I cytoskeletal 14 OS=Mus musculus GN=Krt14 PE=1 SV=2 - [K1C14_MOUSE]	0	0	0	0	0	0	0.150901	0	0	0	0	0	0	0	0	0	0	0	5	0	0	0	0	0	0	0	0	0	0	0	1	0	0	0	0	0	0	0	0	0	0	0	4	0	0	0	0	0
Q61414	Keratin, type I cytoskeletal 15 OS=Mus musculus GN=Krt15 PE=1 SV=2 - [K1C15_MOUSE]	0	0	0	0.0531352	0.059978	0	0	0.0726058	0	0.0795976	0	0	0	0	0	2	2	0	0	2	0	2	0	0	0	0	0	2	1	0	0	1	0	1	0	0	0	0	0	2	2	0	0	2	0	2	0	0
Q9Z2K1	Keratin, type I cytoskeletal 16 OS=Mus musculus GN=Krt16 PE=1 SV=3 - [K1C16_MOUSE]	0	0	0	0	0.0571088	0	0	0	0.067254	0	0	0	0	0	0	0	2	0	0	0	2	0	0	0	0	0	0	0	1	0	0	0	1	0	0	0	0	0	0	0	2	0	0	0	2	0	0	0
Q9QWL7	Keratin, type I cytoskeletal 17 OS=Mus musculus GN=Krt17 PE=1 SV=3 - [K1C17_MOUSE]	0	0	0	0	0	0	0.132514	0	0	0	0	0	0	0	0	0	0	0	4	0	0	0	0	0	0	0	0	0	0	0	1	0	0	0	0	0	0	0	0	0	0	0	3	0	0	0	0	0
Q6IFX2	Keratin, type I cytoskeletal 42 OS=Mus musculus GN=Krt42 PE=1 SV=1 - [K1C42_MOUSE]	0	0	0	0	0	0	0.127304	0	0	0	0	0	0	0	0	0	0	0	4	0	0	0	0	0	0	0	0	0	0	0	2	0	0	0	0	0	0	0	0	0	0	0	3	0	0	0	0	0
P04104	Keratin, type II cytoskeletal 1 OS=Mus musculus GN=Krt1 PE=1 SV=4 - [K2C1_MOUSE]	0.049751	0.077308	0.0481674	0.0397972	0.0673835	0.0481032	0.0972794	0.0815705	0.105805	0.0894255	0.0690615	0.100857	2	3	2	2	3	2	4	3	4	3	2	3	2	2	2	2	2	2	2	2	2	2	2	2	2	2	2	2	2	2	3	2	2	2	2	2
Q3TTY5	Keratin, type II cytoskeletal 2 epidermal OS=Mus musculus GN=Krt2 PE=1 SV=1 - [K22E_MOUSE]	0	0.0476743	0	0	0	0	0.0449927	0	0	0	0	0	0	2	0	0	0	0	2	0	0	0	0	0	0	2	0	0	0	0	1	0	0	0	0	0	0	2	0	0	0	0	2	0	0	0	0	0
Q922U2	Keratin, type II cytoskeletal 5 OS=Mus musculus GN=Krt5 PE=1 SV=1 - [K2C5_MOUSE]	0	0	0	0.0634062	0	0	0.206651	0	0	0	0	0	0	0	0	3	0	0	8	0	0	0	0	0	0	0	0	3	0	0	2	0	0	0	0	0	0	0	0	3	0	0	5	0	0	0	0	0
P50446	Keratin, type II cytoskeletal 6A OS=Mus musculus GN=Krt6a PE=1 SV=3 - [K2C6A_MOUSE]	0.082513	0.0569853	0	0	0.0496698	0.0531867	0.16134	0.0901909	0.0877402	0	0.11454	0	3	2	0	0	2	2	6	3	3	0	3	0	2	2	0	0	2	2	1	2	3	0	2	0	2	2	0	0	2	2	3	2	3	0	2	0
Q8VED5	Keratin, type II cytoskeletal 79 OS=Mus musculus GN=Krt79 PE=1 SV=2 - [K2C79_MOUSE]	0	0	0	0	0	0	0.138615	0	0	0	0	0	0	0	0	0	0	0	5	0	0	0	0	0	0	0	0	0	0	0	1	0	0	0	0	0	0	0	0	0	0	0	3	0	0	0	0	0
P11679	Keratin, type II cytoskeletal 8 OS=Mus musculus GN=Krt8 PE=1 SV=4 - [K2C8_MOUSE]	0	0	0	0	0	0	0.204685	0.130767	0.127214	0.14336	0.0830354	0.0808431	0	0	0	0	0	0	7	4	4	4	2	2	0	0	0	0	0	0	2	2	2	2	2	2	0	0	0	0	0	0	4	2	2	2	2	2
Q61768	Kinesin-1 heavy chain OS=Mus musculus GN=Kif5b PE=1 SV=3 - [KINH_MOUSE]	0	0	0	0	0	0	0.0291283	0	0	0	0	0	0	0	0	0	0	0	2	0	0	0	0	0	0	0	0	0	0	0	2	0	0	0	0	0	0	0	0	0	0	0	2	0	0	0	0	0
O08677	Kininogen-1 OS=Mus musculus GN=Kng1 PE=1 SV=1 - [KNG1_MOUSE]	0.245573	0.185016	0.345827	0.142866	0.362845	0.237439	0.130957	0.414836	0.356086	0.26752	0.495841	0.301718	11	8	16	8	18	11	6	17	15	10	16	10	9	7	12	8	13	8	4	10	8	8	6	7	9	7	12	8	13	8	4	10	8	8	6	7
P08071	Lactotransferrin OS=Mus musculus GN=Ltf PE=1 SV=4 - [TRFL_MOUSE]	0.125801	0.0651608	0.121797	0.0838598	0.132523	0.202724	0.040997	0.0916713	0.156066	0.0502495	0.0873151	0.141683	6	3	6	5	7	10	2	4	7	2	3	5	4	3	4	1	4	7	2	4	4	2	2	5	5	3	6	4	7	9	2	4	5	2	2	5
O88803	Leukocyte cell-derived chemotaxin-2 OS=Mus musculus GN=Lect2 PE=1 SV=1 - [LECT2_MOUSE]	0	0	0.192633	0	0	0	0	0	0	0	0	0	0	0	2	0	0	0	0	0	0	0	0	0	0	0	2	0	0	0	0	0	0	0	0	0	0	0	2	0	0	0	0	0	0	0	0	0
Q61805	Lipopolysaccharide-binding protein OS=Mus musculus GN=Lbp PE=1 SV=2 - [LBP_MOUSE]	0.092281	0.127463	0.119125	0.0984242	0.166649	0.118966	0.120293	0.100868	0.163545	0.184302	0.170799	0.124717	3	4	4	4	6	4	4	3	5	5	4	3	2	3	3	4	4	3	3	3	3	3	3	2	2	3	3	4	4	3	3	3	3	3	3	2
P06151	L-lactate dehydrogenase A chain OS=Mus musculus GN=Ldha PE=1 SV=3 - [LDHA_MOUSE]	0	0	0	0	0	0.1297	0	0	0	0	0	0	0	0	0	0	0	3	0	0	0	0	0	0	0	0	0	0	0	2	0	0	0	0	0	0	0	0	0	0	0	2	0	0	0	0	0	0
P08905	Lysozyme C-2 OS=Mus musculus GN=Lyz2 PE=1 SV=2 - [LYZ2_MOUSE]	0.195581	0.303912	0	0	0.353197	0.283654	0	0.320669	0	0	0.407241	0	2	3	0	0	4	3	0	3	0	0	3	0	2	2	0	0	3	3	0	2	0	0	2	0	2	2	0	0	3	3	0	2	0	0	2	0
P98064	Mannan-binding lectin serine protease 1 OS=Mus musculus GN=Masp1 PE=1 SV=2 - [MASP1_MOUSE]	0.183676	0.169134	0.17783	0.195903	0.165849	0.118395	0.159621	0.133845	0.108507	0.171189	0.0849896	0.137909	9	8	9	12	9	6	8	6	5	7	3	5	6	5	5	6	6	4	5	4	4	3	3	2	6	5	5	6	6	4	5	4	4	3	3	2
Q91WP0	Mannan-binding lectin serine protease 2 OS=Mus musculus GN=Masp2 PE=1 SV=1 - [MASP2_MOUSE]	0.129669	0.11194	0.0418471	0.172876	0.156111	0.0626869	0.105643	0.118112	0.0689415	0.129486	0	0.0584155	6	5	2	10	8	3	5	5	3	5	0	2	5	4	2	8	7	3	4	4	3	4	0	2	5	4	2	8	7	3	4	4	3	4	0	2
P39039	Mannose-binding protein A OS=Mus musculus GN=Mbl1 PE=1 SV=1 - [MBL1_MOUSE]	0.642624	0.599144	0.684386	1.54216	0.75433	0.869875	1.19371	1.47508	1.57167	1.38611	1.42729	1.30275	10	9	11	30	13	14	19	21	23	18	16	15	8	8	9	10	11	10	9	10	9	7	7	10	8	8	9	10	11	10	9	10	9	7	7	10
P41317	Mannose-binding protein C OS=Mus musculus GN=Mbl2 PE=1 SV=2 - [MBL2_MOUSE]	0.314363	0.195395	0.365228	0.201174	0.397393	0.425531	0.614681	0.274891	0.334277	0.452044	0.436381	0.339887	5	3	6	4	7	7	10	4	5	6	5	4	4	3	4	3	4	6	5	4	5	5	4	4	4	3	4	3	4	6	5	4	5	5	4	4
Q9JHI0	Matrix metalloproteinase-19 OS=Mus musculus GN=Mmp19 PE=2 SV=1 - [MMP19_MOUSE]	0	0	0	0	0	0	0	0.060345	0	0.0992341	0.0766365	0.0746131	0	0	0	0	0	0	0	2	0	3	2	2	0	0	0	0	0	0	0	2	0	2	2	2	0	0	0	0	0	0	0	2	0	2	2	2
P39876	Metalloproteinase inhibitor 3 OS=Mus musculus GN=Timp3 PE=1 SV=1 - [TIMP3_MOUSE]	0	0.279664	0	0	0.182821	0.130511	0	0	0	0	0	0	0	4	0	0	3	2	0	0	0	0	0	0	0	3	0	0	3	2	0	0	0	0	0	0	0	3	0	0	3	2	0	0	0	0	0	0
P26041	Moesin OS=Mus musculus GN=Msn PE=1 SV=3 - [MOES_MOUSE]	0	0	0	0	0.0652348	0.139708	0.117722	0.157939	0.230471	0.173148	0.234008	0.195282	0	0	0	0	3	6	5	6	9	6	7	6	0	0	0	0	3	5	4	1	7	5	2	3	0	0	0	0	3	5	4	5	7	5	6	6
B2RPV6	Multimerin-1 OS=Mus musculus GN=Mmrn1 PE=1 SV=2 - [MMRN1_MOUSE]	0	0	0	0	0	0.023187	0.0234456	0.0262128	0	0	0	0	0	0	0	0	0	2	2	2	0	0	0	0	0	0	0	0	0	2	2	2	0	0	0	0	0	0	0	0	0	2	2	2	0	0	0	0
P28665	Murinoglobulin-1 OS=Mus musculus GN=Mug1 PE=1 SV=3 - [MUG1_MOUSE]	0.236955	0.24547	0.229413	0.244832	0.338766	0.544129	0.48263	0.442465	0.430443	0.272115	0.315223	0.293557	24	24	24	31	38	57	50	41	41	23	23	22	12	13	10	14	16	25	20	18	16	11	10	11	18	18	19	22	26	37	35	28	28	19	18	18
P28666	Murinoglobulin-2 OS=Mus musculus GN=Mug2 PE=1 SV=2 - [MUG2_MOUSE]	0.140705	0.0937037	0.126496	0.096475	0.172424	0.252655	0.245647	0.186755	0.203054	0.144522	0.167417	0.13583	14	9	13	12	19	26	25	17	19	12	12	10	5	6	5	5	8	9	7	6	5	3	3	2	11	9	12	11	16	20	21	15	16	10	10	8
Q6URW6	Myosin-14 OS=Mus musculus GN=Myh14 PE=1 SV=1 - [MYH14_MOUSE]	0	0.0147919	0	0.011422	0.0193394	0.0276117	0	0	0	0	0	0	0	2	0	2	3	4	0	0	0	0	0	0	0	1	0	1	1	1	0	0	0	0	0	0	0	2	0	2	2	2	0	0	0	0	0	0
Q8VDD5	Myosin-9 OS=Mus musculus GN=Myh9 PE=1 SV=4 - [MYH9_MOUSE]	0.050465	0.0373417	0.0488587	0.0230676	0.0520767	0.0766756	0.0563861	0.0866813	0.068994	0.0518337	0.0800603	0.107176	7	5	7	4	8	11	8	11	9	6	8	11	7	4	7	3	6	6	8	8	7	5	6	7	7	5	7	4	7	7	8	8	7	5	6	7
P17742	Peptidyl-prolyl cis-trans isomerase A OS=Mus musculus GN=Ppia PE=1 SV=2 - [PPIA_MOUSE]	0	0	0	0	0	0	0	0.198524	0	0	0	0	0	0	0	0	0	0	0	2	0	0	0	0	0	0	0	0	0	0	0	2	0	0	0	0	0	0	0	0	0	0	0	2	0	0	0	0
O70362	Phosphatidylinositol-glycan-specific phospholipase D OS=Mus musculus GN=Gpld1 PE=1 SV=1 - [PHLD_MOUSE]	0	0	0	0	0.0316037	0	0.0342189	0	0	0.0419417	0	0.0946065	0	0	0	0	2	0	2	0	0	2	0	4	0	0	0	0	2	0	2	0	0	2	0	2	0	0	0	0	2	0	2	0	0	2	0	2
P97298	Pigment epithelium-derived factor OS=Mus musculus GN=Serpinf1 PE=1 SV=2 - [PEDF_MOUSE]	0.141193	0.1097	0.0683496	0	0	0.0682585	0.0690198	0	0.150138	0	0	0.0954111	4	3	2	0	0	2	2	0	4	0	0	2	3	3	2	0	0	2	2	0	4	0	0	2	3	3	2	0	0	2	2	0	4	0	0	2
P26262	Plasma kallikrein OS=Mus musculus GN=Klkb1 PE=1 SV=2 - [KLKB1_MOUSE]	0.0685897	0.0473695	0.0664065	0.0548668	0.14451	0.0442119	0	0	0	0	0	0	3	2	3	3	7	2	0	0	0	0	0	0	2	2	3	3	6	2	0	0	0	0	0	0	2	2	3	3	6	2	0	0	0	0	0	0
P97290	Plasma protease C1 inhibitor OS=Mus musculus GN=Serping1 PE=1 SV=3 - [IC1_MOUSE]	0.792742	0.973307	1.05177	0.587164	0.768825	0.823262	0.91856	0.802322	0.718079	0.985133	0.733627	0.595215	27	32	37	25	29	29	32	25	23	28	18	15	13	15	16	13	14	16	14	14	13	13	12	11	13	15	16	13	14	16	14	14	13	13	12	11
P20918	Plasminogen OS=Mus musculus GN=Plg PE=1 SV=3 - [PLMN_MOUSE]	0.485253	0.539926	0.487207	0.848217	1.03859	0.625574	0.421701	0.687563	0.43955	0.387655	0.374223	0.388632	27	29	28	59	64	36	24	35	23	18	15	16	20	20	18	32	32	23	12	19	11	11	9	8	20	20	18	32	32	23	12	19	11	11	9	8
Q9Z126	Platelet factor 4 OS=Mus musculus GN=Pf4 PE=1 SV=1 - [PLF4_MOUSE]	0.435457	0.451104	0.421596	0.232223	0.262129	0.280689	0	0	0	0	0	0	3	3	3	2	2	2	0	0	0	0	0	0	2	2	2	2	2	2	0	0	0	0	0	0	2	2	2	2	2	2	0	0	0	0	0	0
O70570	Polymeric immunoglobulin receptor OS=Mus musculus GN=Pigr PE=1 SV=1 - [PIGR_MOUSE]	0.192002	0.198901	0.167301	0.153588	0.0866835	0.148514	0.168942	0.0839471	0.102083	0.161054	0.0533053	0.0518979	10	10	9	10	5	8	9	4	5	7	2	2	9	9	7	8	5	7	8	4	4	5	2	2	9	9	7	8	5	7	8	4	4	5	2	2
Q61838	Pregnancy zone protein OS=Mus musculus GN=Pzp PE=1 SV=3 - [PZP_MOUSE]	0.787205	0.75433	0.790729	0.692678	0.666377	1.1417	1.09671	0.785165	0.795221	0.683903	0.71029	0.66494	80	74	83	88	75	120	114	73	76	58	52	50	41	40	42	44	41	58	51	43	41	35	35	28	41	40	42	44	41	58	51	43	41	35	35	28
P62962	Profilin-1 OS=Mus musculus GN=Pfn1 PE=1 SV=2 - [PROF1_MOUSE]	0	0	0	0	0	0	0	0	0	0.261502	0	0	0	0	0	0	0	0	0	0	0	2	0	0	0	0	0	0	0	0	0	0	0	2	0	0	0	0	0	0	0	0	0	0	0	2	0	0
P11680	Properdin OS=Mus musculus GN=Cfp PE=2 SV=2 - [PROP_MOUSE]	0.616153	0.739077	0.50235	0.856052	0.556352	0.37626	0.158524	0.248127	0.172417	0.11658	0.225082	0.219139	19	22	16	33	19	12	5	7	5	3	5	5	11	13	12	14	12	8	4	6	4	3	4	4	11	13	12	14	12	8	4	6	4	3	4	4
Q9R1P4	Proteasome subunit alpha type-1 OS=Mus musculus GN=Psma1 PE=1 SV=1 - [PSA1_MOUSE]	0	0	0	0	0	0.160217	0.108002	0	0	0	0	0	0	0	0	0	0	3	2	0	0	0	0	0	0	0	0	0	0	2	2	0	0	0	0	0	0	0	0	0	0	2	2	0	0	0	0	0
P49722	Proteasome subunit alpha type-2 OS=Mus musculus GN=Psma2 PE=1 SV=3 - [PSA2_MOUSE]	0.125894	0	0	0	0	0.486895	0.676948	0	0.200803	0.150859	0	0	2	0	0	0	0	8	11	0	3	2	0	0	2	0	0	0	0	5	5	0	2	2	0	0	2	0	0	0	0	5	5	0	2	2	0	0
O70435	Proteasome subunit alpha type-3 OS=Mus musculus GN=Psma3 PE=1 SV=3 - [PSA3_MOUSE]	0.114909	0.178557	0.111252	0	0	0.111103	0.168514	0	0	0	0	0.155299	2	3	2	0	0	2	3	0	0	0	0	2	2	2	2	0	0	2	2	0	0	0	0	2	2	2	2	0	0	2	2	0	0	0	0	2
Q9Z2U1	Proteasome subunit alpha type-5 OS=Mus musculus GN=Psma5 PE=1 SV=1 - [PSA5_MOUSE]	0	0	0	0	0	0.119492	0.120825	0	0	0.148093	0	0.167025	0	0	0	0	0	2	2	0	0	2	0	2	0	0	0	0	0	2	2	0	0	2	0	2	0	0	0	0	0	2	2	0	0	2	0	2
Q9QUM9	Proteasome subunit alpha type-6 OS=Mus musculus GN=Psma6 PE=1 SV=1 - [PSA6_MOUSE]	0	0	0	0.143082	0	0.172944	0	0	0	0	0	0	0	0	0	3	0	3	0	0	0	0	0	0	0	0	0	2	0	3	0	0	0	0	0	0	0	0	0	2	0	3	0	0	0	0	0	0
Q9Z2U0	Proteasome subunit alpha type-7 OS=Mus musculus GN=Psma7 PE=1 SV=1 - [PSA7_MOUSE]	0	0	0	0.1406	0	0	0.11456	0	0	0	0	0	0	0	0	3	0	0	2	0	0	0	0	0	0	0	0	2	0	0	2	0	0	0	0	0	0	0	0	2	0	0	2	0	0	0	0	0
O09061	Proteasome subunit beta type-1 OS=Mus musculus GN=Psmb1 PE=1 SV=1 - [PSB1_MOUSE]	0	0.128215	0	0	0	0.119668	0.302508	0	0.131608	0.148312	0.171808	0.167271	0	2	0	0	0	2	5	0	2	2	2	2	0	2	0	0	0	2	4	0	2	2	2	2	0	2	0	0	0	2	4	0	2	2	2	2
O35955	Proteasome subunit beta type-10 OS=Mus musculus GN=Psmb10 PE=1 SV=1 - [PSB10_MOUSE]	0	0	0	0	0	0.16288	0.164697	0	0	0	0	0	0	0	0	0	0	3	3	0	0	0	0	0	0	0	0	0	0	3	2	0	0	0	0	0	0	0	0	0	0	3	2	0	0	0	0	0
Q9R1P3	Proteasome subunit beta type-2 OS=Mus musculus GN=Psmb2 PE=1 SV=1 - [PSB2_MOUSE]	0	0	0	0	0	0.137775	0.278623	0	0	0	0	0.19258	0	0	0	0	0	2	4	0	0	0	0	2	0	0	0	0	0	2	2	0	0	0	0	2	0	0	0	0	0	2	2	0	0	0	0	2
Q9R1P1	Proteasome subunit beta type-3 OS=Mus musculus GN=Psmb3 PE=1 SV=1 - [PSB3_MOUSE]	0	0	0	0.113698	0	0.274856	0.277922	0	0.15114	0	0	0	0	0	0	2	0	4	4	0	2	0	0	0	0	0	0	2	0	4	3	0	2	0	0	0	0	0	0	2	0	4	3	0	2	0	0	0
P99026	Proteasome subunit beta type-4 OS=Mus musculus GN=Psmb4 PE=1 SV=1 - [PSB4_MOUSE]	0	0	0	0	0	0	0.1096	0	0.178809	0	0	0	0	0	0	0	0	0	2	0	3	0	0	0	0	0	0	0	0	0	2	0	3	0	0	0	0	0	0	0	0	0	2	0	3	0	0	0
O35522	Proteasome subunit beta type-9 OS=Mus musculus bactrianus GN=Psmb9 PE=1 SV=1 - [PSB9_MUSMB]	0	0	0	0.111453	0	0.134714	0.204326	0	0	0	0	0	0	0	0	2	0	2	3	0	0	0	0	0	0	0	0	2	0	2	2	0	0	0	0	0	0	0	0	2	0	2	2	0	0	0	0	0
P31725	Protein S100-A9 OS=Mus musculus GN=S100a9 PE=1 SV=3 - [S10A9_MOUSE]	0	0	0	0.200097	0.677596	0.604645	0	0.410129	0	0	0.347235	0	0	0	0	2	6	5	0	3	0	0	2	0	0	0	0	2	4	3	0	3	0	0	2	0	0	0	0	2	4	3	0	3	0	0	2	0
Q9JM99	Proteoglycan 4 OS=Mus musculus GN=Prg4 PE=1 SV=2 - [PRG4_MOUSE]	0	0	0	0	0	0.0408098	0.02751	0.0615136	0.0299211	0.0505779	0.0976507	0	0	0	0	0	0	3	2	4	2	3	5	0	0	0	0	0	0	3	2	2	2	2	2	0	0	0	0	0	0	3	2	2	2	2	2	0
P19221	Prothrombin OS=Mus musculus GN=F2 PE=1 SV=1 - [THRB_MOUSE]	0.418056	0.360899	0.337291	0.315836	0.314568	0.538946	0.227066	0.330024	0.271663	0.222649	0.386882	0.470834	18	15	15	17	15	24	10	13	11	8	12	15	12	11	12	10	12	17	6	8	8	5	8	9	12	11	12	10	12	17	6	8	8	5	8	9
P52480	Pyruvate kinase PKM OS=Mus musculus GN=Pkm PE=1 SV=4 - [KPYM_MOUSE]	0.225708	0.292273	0.273155	0.18055	0.280228	0.354628	0.220667	0.431744	0.33001	0.338085	0.35248	0.305044	8	10	10	8	11	13	8	14	11	10	9	8	7	8	9	8	9	10	6	9	7	6	7	7	7	8	9	8	9	10	6	9	7	6	7	7
P62835	Ras-related protein Rap-1A OS=Mus musculus GN=Rap1a PE=1 SV=1 - [RAP1A_MOUSE]	0.31105	0.161114	0.225862	0.311022	0.210646	0.300748	0.228077	0.254995	0.248066	0	0.215891	0	4	2	3	5	3	4	3	3	3	0	2	0	3	2	2	3	3	3	2	2	2	0	2	0	3	2	2	3	3	3	2	2	2	0	2	0
Q9JJH1	Ribonuclease 4 OS=Mus musculus GN=Rnase4 PE=1 SV=1 - [RNAS4_MOUSE]	0.287591	0	0	0	0	0	0	0	0	0	0	0	3	0	0	0	0	0	0	0	0	0	0	0	3	0	0	0	0	0	0	0	0	0	0	0	3	0	0	0	0	0	0	0	0	0	0	0
Q8K1I3	Secreted phosphoprotein 24 OS=Mus musculus GN=Spp2 PE=1 SV=2 - [SPP24_MOUSE]	0	0	0	0	0.191081	0	0	0	0.225026	0	0	0	0	0	0	0	3	0	0	0	3	0	0	0	0	0	0	0	2	0	0	0	2	0	0	0	0	0	0	0	2	0	0	0	2	0	0	0
P70274	Selenoprotein P OS=Mus musculus GN=Sepp1 PE=1 SV=3 - [SEPP1_MOUSE]	0	0.118737	0.147961	0.0611245	0	0.0738816	0	0	0	0	0	0	0	3	4	2	0	2	0	0	0	0	0	0	0	2	3	2	0	2	0	0	0	0	0	0	0	2	3	2	0	2	0	0	0	0	0	0
P07759	Serine protease inhibitor A3K OS=Mus musculus GN=Serpina3k PE=1 SV=2 - [SPA3K_MOUSE]	0.522189	0.504889	0.640385	0.445561	0.502941	0.605872	0.918944	1.0274	0.888431	0.876041	1.06315	1.41147	15	14	19	16	16	18	27	27	24	21	22	30	7	7	8	7	7	6	9	8	8	8	8	9	12	12	13	11	12	11	15	14	13	13	12	14
Q03734	Serine protease inhibitor A3M OS=Mus musculus GN=Serpina3m PE=1 SV=2 - [SPA3M_MOUSE]	0.381438	0.466989	0.436442	0.388338	0.500971	0.502915	0.474623	0.53064	0.626839	0.457081	0.385084	0.70297	11	13	13	14	16	15	14	14	17	11	8	15	3	4	4	4	4	3	2	2	4	3	1	3	8	9	9	8	9	8	8	8	10	8	5	8
Q91WP6	Serine protease inhibitor A3N OS=Mus musculus GN=Serpina3n PE=1 SV=1 - [SPA3N_MOUSE]	0.104799	0.180942	0.169106	0	0.220799	0.303985	0.23907	0.343653	0.4829	0.418607	0.387938	0.566544	3	5	5	0	7	9	7	9	13	10	8	12	1	2	2	0	5	6	3	5	7	5	5	7	3	4	4	0	7	8	6	8	11	8	7	9
Q921I1	Serotransferrin OS=Mus musculus GN=Tf PE=1 SV=1 - [TRFE_MOUSE]	0.340345	0.396646	0.391295	0.408377	0.499383	0.473041	0.29115	0.348763	0.316667	0.229409	0.265752	0.201239	16	18	19	24	26	23	14	15	14	9	9	7	14	14	14	18	21	17	11	13	11	9	8	5	14	14	15	21	22	17	12	13	12	9	8	5
P07724	Serum albumin OS=Mus musculus GN=Alb PE=1 SV=3 - [ALBU_MOUSE]	2.87478	3.39649	2.73727	3.21186	3.04627	2.04447	1.57949	1.45428	1.33897	1.39503	1.22027	1.15594	121	138	119	169	142	89	68	56	53	49	37	36	36	37	37	39	39	36	21	27	21	19	16	17	36	37	37	39	39	36	21	27	21	19	16	17
P12246	Serum amyloid P-component OS=Mus musculus GN=Apcs PE=1 SV=2 - [SAMP_MOUSE]	0	0	0	0.0994773	0	0.180358	0.30395	0.339823	0.462825	0.447057	0.345253	0.504207	0	0	0	2	0	3	5	5	7	6	4	6	0	0	0	2	0	3	4	4	5	3	3	3	0	0	0	2	0	3	4	4	5	3	3	3
P52430	Serum paraoxonase/arylesterase 1 OS=Mus musculus GN=Pon1 PE=1 SV=2 - [PON1_MOUSE]	0	0	0	0	0	0	0	0	0	0	0.171776	0	0	0	0	0	0	0	0	0	0	0	3	0	0	0	0	0	0	0	0	0	0	0	2	0	0	0	0	0	0	0	0	0	0	0	2	0
P26039	Talin-1 OS=Mus musculus GN=Tln1 PE=1 SV=2 - [TLN1_MOUSE]	0.0544356	0.0501259	0.0644146	0.0435445	0.0819205	0.163746	0.112353	0.138835	0.135063	0.0869742	0.142733	0.13079	9	8	11	9	15	28	19	21	21	12	17	16	7	7	9	7	12	21	16	15	16	9	13	13	7	7	9	7	12	21	16	15	16	9	13	13
P11983	T-complex protein 1 subunit alpha OS=Mus musculus GN=Tcp1 PE=1 SV=3 - [TCPA_MOUSE]	0	0	0	0.0431929	0	0	0	0	0	0	0	0	0	0	0	2	0	0	0	0	0	0	0	0	0	0	0	2	0	0	0	0	0	0	0	0	0	0	0	2	0	0	0	0	0	0	0	0
P43025	Tetranectin OS=Mus musculus GN=Clec3b PE=1 SV=2 - [TETN_MOUSE]	0	0	0.141982	0	0	0.283585	0	0	0	0	0.203571	0	0	0	2	0	0	4	0	0	0	0	2	0	0	0	2	0	0	3	0	0	0	0	2	0	0	0	2	0	0	3	0	0	0	0	2	0
P35441	Thrombospondin-1 OS=Mus musculus GN=Thbs1 PE=1 SV=1 - [TSP1_MOUSE]	0.61682	0.508579	0.572811	0.140975	0.193229	0.279938	0.159991	0.137595	0.267712	0.105591	0.139793	0.255192	49	39	47	14	17	23	13	10	20	7	8	15	33	29	30	12	12	20	10	7	15	6	5	12	33	29	30	12	12	20	10	7	15	6	5	12
Q62351	Transferrin receptor protein 1 OS=Mus musculus GN=Tfrc PE=1 SV=1 - [TFR1_MOUSE]	0.228434	0.197202	0.165872	0.243641	0.223452	0.147245	0.279165	0.436958	0.242906	0.342168	0.26425	0.154364	12	10	9	16	13	8	15	21	12	15	10	6	9	7	9	13	13	6	14	18	11	13	9	5	9	7	9	13	13	6	14	18	11	13	9	5
P82198	Transforming growth factor-beta-induced protein ig-h3 OS=Mus musculus GN=Tgfbi PE=1 SV=1 - [BGH3_MOUSE]	0	0	0	0	0	0	0	0	0	0	0	0.059135	0	0	0	0	0	0	0	0	0	0	0	2	0	0	0	0	0	0	0	0	0	0	0	2	0	0	0	0	0	0	0	0	0	0	0	2
P07309	Transthyretin OS=Mus musculus GN=Ttr PE=1 SV=1 - [TTHY_MOUSE]	0.310346	0.428663	0.500779	0.248254	0.840675	0.800178	0.707965	0.904597	0.770014	0.74378	1.00521	0.699051	3	4	5	3	9	8	7	8	7	6	7	5	3	3	3	3	3	6	4	5	5	5	4	4	3	3	3	3	3	6	4	5	5	5	4	4
P68373	Tubulin alpha-1C chain OS=Mus musculus GN=Tuba1c PE=1 SV=1 - [TBA1C_MOUSE]	0	0	0	0	0	0	0	0.178711	0	0.156736	0.226958	0.309352	0	0	0	0	0	0	0	5	0	4	5	7	0	0	0	0	0	0	0	2	0	1	2	2	0	0	0	0	0	0	0	4	0	3	3	4
P05214	Tubulin alpha-3 chain OS=Mus musculus GN=Tuba3a PE=1 SV=1 - [TBA3_MOUSE]	0	0	0	0	0	0.0631694	0.095811	0	0.173681	0	0	0	0	0	0	0	0	2	3	0	5	0	0	0	0	0	0	0	0	1	2	0	2	0	0	0	0	0	0	0	0	2	3	0	4	0	0	0
P68368	Tubulin alpha-4A chain OS=Mus musculus GN=Tuba4a PE=1 SV=1 - [TBA4A_MOUSE]	0	0	0	0	0	0.158035	0.223717	0.178658	0.208564	0.15669	0.272269	0.26508	0	0	0	0	0	5	7	5	6	4	6	6	0	0	0	0	0	2	2	1	2	1	1	1	0	0	0	0	0	3	3	3	4	3	2	3
A2AQ07	Tubulin beta-1 chain OS=Mus musculus GN=Tubb1 PE=1 SV=1 - [TBB1_MOUSE]	0.06471	0.100553	0.0939754	0.0517634	0	0.156417	0.126529	0.106097	0.206428	0.116314	0.13474	0.218638	2	3	3	2	0	5	4	3	6	3	3	5	1	2	2	1	0	4	1	3	3	3	3	4	2	3	3	2	0	4	2	3	4	3	3	4
P68372	Tubulin beta-4B chain OS=Mus musculus GN=Tubb4b PE=1 SV=1 - [TBB4B_MOUSE]	0.131004	0.237495	0.22196	0.104794	0.147862	0.221664	0.192117	0.214791	0.208955	0.156983	0.227316	0.30984	4	7	7	4	5	7	6	6	6	4	5	7	1	1	1	1	1	5	4	4	4	3	4	4	4	4	4	3	4	5	5	4	5	3	4	4
P99024	Tubulin beta-5 chain OS=Mus musculus GN=Tubb5 PE=1 SV=1 - [TBB5_MOUSE]	0.131427	0.238261	0.190865	0.0788488	0.148339	0	0	0	0	0	0	0	4	7	6	3	5	0	0	0	0	0	0	0	1	1	1	1	1	0	0	0	0	0	0	0	4	4	4	3	4	0	0	0	0	0	0	0
P21614	Vitamin D-binding protein OS=Mus musculus GN=Gc PE=1 SV=2 - [VTDB_MOUSE]	0	0.0946275	0	0	0.0549864	0.0883198	0	0	0.0971319	0	0	0.0823017	0	3	0	0	2	3	0	0	3	0	0	2	0	2	0	0	2	2	0	0	3	0	0	2	0	2	0	0	2	2	0	0	3	0	0	2
P29788	Vitronectin OS=Mus musculus GN=Vtn PE=1 SV=2 - [VTNC_MOUSE]	1.21993	1.1713	1.1811	0.690241	1.209	0.920606	1.04723	1.33345	1.10738	0.891376	1.32171	1.12596	41	38	41	29	45	32	36	41	35	25	32	28	11	10	12	11	14	11	11	11	10	9	10	10	11	10	12	11	14	11	11	11	10	9	10	10
Q00519	Xanthine dehydrogenase/oxidase OS=Mus musculus GN=Xdh PE=1 SV=5 - [XDH_MOUSE]	0	0	0	0	0.0201092	0	0.0326598	0	0	0	0	0	0	0	0	0	2	0	3	0	0	0	0	0	0	0	0	0	2	0	3	0	0	0	0	0	0	0	0	0	2	0	3	0	0	0	0	0

## Sheet: Heat map
Accession	Description	Cit-IONP	HEP0-IONP	HEP8-IONP	HEP24-IONP
P01872	Ig mu chain C region OS=Mus musculus GN=Ighm PE=1 SV=2 - [IGHM_MOUSE]	9.28527	4.84836	4.72699	4.42651
P01837	Ig kappa chain C region OS=Mus musculus PE=1 SV=1 - [IGKC_MOUSE]	6.05532	5.84676	6.15362	5.86944
Q9ESB3	Histidine-rich glycoprotein OS=Mus musculus GN=Hrg PE=1 SV=2 - [HRG_MOUSE]	5.14557	2.21306	2.91337	2.40876
P98086	Complement C1q subcomponent subunit A OS=Mus musculus GN=C1qa PE=1 SV=2 - [C1QA_MOUSE]	3.35731	2.28261	2.49811	2.58904
P07724	Serum albumin OS=Mus musculus GN=Alb PE=1 SV=3 - [ALBU_MOUSE]	3.13564	1.48726	1.33728	1.24746
P06330	Ig heavy chain V region AC38 205.12 OS=Mus musculus PE=1 SV=1 - [HVM51_MOUSE]	2.30743	2.24419	1.91012	2.21812
P01863	Ig gamma-2A chain C region, A allele OS=Mus musculus GN=Ighg PE=1 SV=1 - [GCAA_MOUSE]	2.26271	1.37827	1.37578	1.37516
P01644	Ig kappa chain V-V region HP R16.7 OS=Mus musculus PE=1 SV=1 - [KV5AB_MOUSE]	2.08981	2.28805	1.45503	2.09156
P01864	Ig gamma-2A chain C region secreted form OS=Mus musculus PE=1 SV=1 - [GCAB_MOUSE]	1.95526	1.67637	1.6578	1.82631
P01844	Ig lambda-2 chain C region OS=Mus musculus GN=Iglc2 PE=1 SV=1 - [LAC2_MOUSE]	1.84385	1.64854	1.51842	1.40068
P32261	Antithrombin-III OS=Mus musculus GN=Serpinc1 PE=1 SV=1 - [ANT3_MOUSE]	1.38769	1.55181	1.70243	1.65228
Q9QWK4	CD5 antigen-like OS=Mus musculus GN=Cd5l PE=1 SV=3 - [CD5L_MOUSE]	1.36874	0.674087	0.479449	0.584267
Q8CG14	Complement C1s-A subcomponent OS=Mus musculus GN=C1sa PE=2 SV=2 - [CS1A_MOUSE]	1.36409	0.95626	0.994782	1.078
P01631	Ig kappa chain V-II region 26-10 OS=Mus musculus PE=1 SV=1 - [KV2A7_MOUSE]	1.35364	1.2224	1.30013	1.49656
P18527	Ig heavy chain V region 914 OS=Mus musculus PE=1 SV=1 - [HVM56_MOUSE]	1.32869	1.51584	1.79287	1.51595
P03987	Ig gamma-3 chain C region OS=Mus musculus PE=1 SV=2 - [IGHG3_MOUSE]	1.29906	0.818355	1.1967	0.820163
P01750	Ig heavy chain V region 102 OS=Mus musculus PE=1 SV=1 - [HVM06_MOUSE]	1.2255	0.828009	0.837402	1.03551
Q02105	Complement C1q subcomponent subunit C OS=Mus musculus GN=C1qc PE=1 SV=2 - [C1QC_MOUSE]	1.21219	1.04849	1.03772	1.13722
P29788	Vitronectin OS=Mus musculus GN=Vtn PE=1 SV=2 - [VTNC_MOUSE]	1.19562	0.969305	1.32758	1.11667
P01672	Ig kappa chain V-III region PC 7940 OS=Mus musculus PE=1 SV=1 - [KV3AK_MOUSE]	1.17421	0	0	0
P01878	Ig alpha chain C region OS=Mus musculus PE=1 SV=1 - [IGHA_MOUSE]	1.17215	1.82763	1.46938	1.57957
Q8CG16	Complement C1r-A subcomponent OS=Mus musculus GN=C1ra PE=1 SV=1 - [C1RA_MOUSE]	1.1717	0.547627	0.690837	0.64683
P01801	Ig heavy chain V-III region J606 OS=Mus musculus PE=1 SV=1 - [HVM32_MOUSE]	1.10348	1.53073	0.69626	0.677341
P01753	Ig heavy chain V region 186-1 OS=Mus musculus PE=4 SV=2 - [HVM09_MOUSE]	1.09442	0.902393	0.923787	0.966342
P01756	Ig heavy chain V region MOPC 104E OS=Mus musculus PE=1 SV=1 - [HVM12_MOUSE]	1.082	0.614458	1.22899	0.601481
P01843	Ig lambda-1 chain C region OS=Mus musculus PE=1 SV=1 - [LAC1_MOUSE]	1.07266	1.31169	1.10576	0.851204
P01671	Ig kappa chain V-III region PC 7175 OS=Mus musculus PE=1 SV=1 - [KV3AJ_MOUSE]	0.968249	0	0	0
P01867	Ig gamma-2B chain C region OS=Mus musculus GN=Igh-3 PE=1 SV=3 - [IGG2B_MOUSE]	0.937743	0.615729	0.532624	0.676812
P14106	Complement C1q subcomponent subunit B OS=Mus musculus GN=C1qb PE=1 SV=2 - [C1QB_MOUSE]	0.932716	1.08645	1.17009	1.12118
P01635	Ig kappa chain V-V region K2 (Fragment) OS=Mus musculus PE=1 SV=1 - [KV5A3_MOUSE]	0.924335	1.47472	1.48096	1.14664
P01638	Ig kappa chain V-V region L6 (Fragment) OS=Mus musculus PE=4 SV=1 - [KV5A6_MOUSE]	0.897808	1.01858	1.31601	1.04412
Q00623	Apolipoprotein A-I OS=Mus musculus GN=Apoa1 PE=1 SV=2 - [APOA1_MOUSE]	0.894864	1.41461	1.46041	1.41597
P97290	Plasma protease C1 inhibitor OS=Mus musculus GN=Serping1 PE=1 SV=3 - [IC1_MOUSE]	0.883025	0.951847	0.767974	0.656647
P04942	Ig kappa chain V-VI region NQ5-61.1.2 OS=Mus musculus PE=2 SV=1 - [KV6A8_MOUSE]	0.85894	0	0	0
P01592	Immunoglobulin J chain OS=Mus musculus GN=Jchain PE=1 SV=4 - [IGJ_MOUSE]	0.831682	0.132865	0.198062	0
P01806	Ig heavy chain V region 441 OS=Mus musculus PE=4 SV=1 - [HVM36_MOUSE]	0.772067	0.70159	0.645931	0.830339
Q61838	Pregnancy zone protein OS=Mus musculus GN=Pzp PE=1 SV=3 - [PZP_MOUSE]	0.770768	0.890307	0.747728	0.73008
P01821	Ig heavy chain V region MC101 OS=Mus musculus PE=1 SV=1 - [HVM45_MOUSE]	0.726731	0.408688	0.534022	0.607222
Q00896	Alpha-1-antitrypsin 1-3 OS=Mus musculus GN=Serpina1c PE=1 SV=2 - [A1AT3_MOUSE]	0.70665	0.530693	0.569136	0.557441
P01654	Ig kappa chain V-III region PC 2880/PC 1229 OS=Mus musculus PE=1 SV=1 - [KV3A1_MOUSE]	0.693351	1.2007	1.01399	1.38825
P01810	Ig heavy chain V region J539 OS=Mus musculus PE=1 SV=1 - [HVM40_MOUSE]	0.689023	0.670545	0.269467	0.660861
P11680	Properdin OS=Mus musculus GN=Cfp PE=2 SV=2 - [PROP_MOUSE]	0.677615	0.137552	0.236604	0.195778
P04186	Complement factor B OS=Mus musculus GN=Cfb PE=1 SV=2 - [CFAB_MOUSE]	0.67513	0.41353	0.505011	0.545288
P01820	Ig heavy chain V region PJ14 OS=Mus musculus PE=1 SV=1 - [HVM44_MOUSE]	0.667353	0.492046	0.650643	0.652134
P18525	Ig heavy chain V region 5-84 OS=Mus musculus PE=1 SV=1 - [HVM54_MOUSE]	0.6499	0	0	0
Q8CFG8	Complement C1s-B subcomponent OS=Mus musculus GN=C1sb PE=2 SV=1 - [CS1B_MOUSE]	0.641079	0.523062	0.244208	0.282824
P01639	Ig kappa chain V-V region MOPC 41 OS=Mus musculus GN=Gm5571 PE=1 SV=1 - [KV5A7_MOUSE]	0.637451	1.33962	1.41475	1.27208
P01636	Ig kappa chain V-V region MOPC 149 OS=Mus musculus PE=1 SV=1 - [KV5A4_MOUSE]	0.625072	0.900512	1.17805	1.36293
P08226	Apolipoprotein E OS=Mus musculus GN=Apoe PE=1 SV=2 - [APOE_MOUSE]	0.624897	0.571816	0.607511	0.74496
P39039	Mannose-binding protein A OS=Mus musculus GN=Mbl1 PE=1 SV=1 - [MBL1_MOUSE]	0.620884	1.28991	1.45119	1.43721
P01868	Ig gamma-1 chain C region secreted form OS=Mus musculus GN=Ighg1 PE=1 SV=1 - [IGHG1_MOUSE]	0.604069	0.823075	0.793887	0.637975
Q06890	Clusterin OS=Mus musculus GN=Clu PE=1 SV=1 - [CLUS_MOUSE]	0.593573	0.683994	0.901499	0.953686
P35441	Thrombospondin-1 OS=Mus musculus GN=Thbs1 PE=1 SV=1 - [TSP1_MOUSE]	0.562699	0.132791	0.138694	0.261452
P02088	Hemoglobin subunit beta-1 OS=Mus musculus GN=Hbb-b1 PE=1 SV=2 - [HBB1_MOUSE]	0.524402	0.908122	0.951033	1.21431
P07759	Serine protease inhibitor A3K OS=Mus musculus GN=Serpina3k PE=1 SV=2 - [SPA3K_MOUSE]	0.513539	0.897492	1.04527	1.14995
P20918	Plasminogen OS=Mus musculus GN=Plg PE=1 SV=3 - [PLMN_MOUSE]	0.512589	0.404678	0.530893	0.414091
P01747	Ig heavy chain V region 36-65 OS=Mus musculus PE=1 SV=1 - [HVM03_MOUSE]	0.497185	0.367413	0.456454	0.260826
P22599	Alpha-1-antitrypsin 1-2 OS=Mus musculus GN=Serpina1b PE=1 SV=2 - [A1AT2_MOUSE]	0.486875	0.399648	0	0.188733
P01633	Ig kappa chain V19-17 OS=Mus musculus GN=Igk-V19-17 PE=1 SV=1 - [KV5A1_MOUSE]	0.457601	0.24273	0.325653	0.211203
P06327	Ig heavy chain V region VH558 A1/A4 OS=Mus musculus GN=Gm5629 PE=2 SV=1 - [HVM52_MOUSE]	0.44942	0.486066	0.468285	0.437634
Q9Z126	Platelet factor 4 OS=Mus musculus GN=Pf4 PE=1 SV=1 - [PLF4_MOUSE]	0.443281	0	0	0
P01675	Ig kappa chain V-VI region XRPC 44 OS=Mus musculus PE=1 SV=1 - [KV6A1_MOUSE]	0.428652	0.626333	0.522399	0.508429
P01027	Complement C3 OS=Mus musculus GN=C3 PE=1 SV=3 - [CO3_MOUSE]	0.427302	0.52879	0.421751	0.494113
Q03734	Serine protease inhibitor A3M OS=Mus musculus GN=Serpina3m PE=1 SV=2 - [SPA3M_MOUSE]	0.424213	0.465852	0.457862	0.664905
P01029	Complement C4-B OS=Mus musculus GN=C4b PE=1 SV=3 - [CO4B_MOUSE]	0.422123	0.651086	0.491649	0.433966
P19221	Prothrombin OS=Mus musculus GN=F2 PE=1 SV=1 - [THRB_MOUSE]	0.389478	0.224857	0.358453	0.371249
P01783	Ig heavy chain V region MOPC 21 (Fragment) OS=Mus musculus PE=1 SV=1 - [HVM16_MOUSE]	0.388736	0.548091	0.462207	0.56497
P07309	Transthyretin OS=Mus musculus GN=Ttr PE=1 SV=1 - [TTHY_MOUSE]	0.369505	0.725873	0.954904	0.734533
Q921I1	Serotransferrin OS=Mus musculus GN=Tf PE=1 SV=1 - [TRFE_MOUSE]	0.368496	0.260279	0.307258	0.258953
P01660	Ig kappa chain V-III region PC 3741/TEPC 111 OS=Mus musculus PE=1 SV=1 - [KV3A8_MOUSE]	0.349319	0	0	0
Q8VCG4	Complement component C8 gamma chain OS=Mus musculus GN=C8g PE=1 SV=1 - [CO8G_MOUSE]	0.331495	0.201218	0.230231	0.262642
P01942	Hemoglobin subunit alpha OS=Mus musculus GN=Hba PE=1 SV=2 - [HBA_MOUSE]	0.330386	0.706222	0.520893	0.726229
Q9JJN5	Carboxypeptidase N catalytic chain OS=Mus musculus GN=Cpn1 PE=1 SV=1 - [CBPN_MOUSE]	0.320435	0.220873	0.329616	0.304058
P01749	Ig heavy chain V region 3 OS=Mus musculus GN=Ighv1-61 PE=1 SV=1 - [HVM05_MOUSE]	0.320229	0.545683	0.535198	0.45419
P01790	Ig heavy chain V region M511 OS=Mus musculus PE=1 SV=1 - [HVM21_MOUSE]	0.309591	1.15734	1.03811	0.99313
P01789	Ig heavy chain V region M603 OS=Mus musculus PE=1 SV=1 - [HVM20_MOUSE]	0.299421	0	0	0
P13020	Gelsolin OS=Mus musculus GN=Gsn PE=1 SV=3 - [GELS_MOUSE]	0.298772	0.367695	0.46276	0.527351
P52480	Pyruvate kinase PKM OS=Mus musculus GN=Pkm PE=1 SV=4 - [KPYM_MOUSE]	0.258991	0.279376	0.392112	0.317527
P41317	Mannose-binding protein C OS=Mus musculus GN=Mbl2 PE=1 SV=2 - [MBL2_MOUSE]	0.254879	0.533363	0.355636	0.337082
P08905	Lysozyme C-2 OS=Mus musculus GN=Lyz2 PE=1 SV=2 - [LYZ2_MOUSE]	0.249746	0	0.363955	0
P28665	Murinoglobulin-1 OS=Mus musculus GN=Mug1 PE=1 SV=3 - [MUG1_MOUSE]	0.241213	0.377372	0.378844	0.362
P60710	Actin, cytoplasmic 1 OS=Mus musculus GN=Actb PE=1 SV=1 - [ACTB_MOUSE]	0.23813	0.416806	0.339576	0.424923
P62835	Ras-related protein Rap-1A OS=Mus musculus GN=Rap1a PE=1 SV=1 - [RAP1A_MOUSE]	0.236082	0.114038	0.235443	0.124033
O08677	Kininogen-1 OS=Mus musculus GN=Kng1 PE=1 SV=1 - [KNG1_MOUSE]	0.215294	0.199238	0.455339	0.328902
Q62351	Transferrin receptor protein 1 OS=Mus musculus GN=Tfrc PE=1 SV=1 - [TFR1_MOUSE]	0.212818	0.310667	0.350604	0.198635
P05064	Fructose-bisphosphate aldolase A OS=Mus musculus GN=Aldoa PE=1 SV=2 - [ALDOA_MOUSE]	0.211063	0	0	0
Q80YC5	Coagulation factor XII OS=Mus musculus GN=F12 PE=1 SV=2 - [FA12_MOUSE]	0.202739	0.135129	0.154084	0.179956
O70570	Polymeric immunoglobulin receptor OS=Mus musculus GN=Pigr PE=1 SV=1 - [PIGR_MOUSE]	0.195451	0.164998	0.0686262	0.0769902
P01786	Ig heavy chain V region MOPC 47A OS=Mus musculus PE=1 SV=1 - [HVM17_MOUSE]	0.195449	0.759594	0.798768	0.741224
A6X935	Inter alpha-trypsin inhibitor, heavy chain 4 OS=Mus musculus GN=Itih4 PE=1 SV=2 - [ITIH4_MOUSE]	0.189922	0.437658	0.410848	0.455663
P18531	Ig heavy chain V region 3-6 OS=Mus musculus GN=Ighv3-6 PE=1 SV=1 - [HVM60_MOUSE]	0.186944	0.88824	0.909299	0.818662
P99024	Tubulin beta-5 chain OS=Mus musculus GN=Tubb5 PE=1 SV=1 - [TBB5_MOUSE]	0.184844	0	0	0
P68372	Tubulin beta-4B chain OS=Mus musculus GN=Tubb4b PE=1 SV=1 - [TBB4B_MOUSE]	0.18425	0.17455	0.221054	0.259397
P98064	Mannan-binding lectin serine protease 1 OS=Mus musculus GN=Masp1 PE=1 SV=2 - [MASP1_MOUSE]	0.176405	0.165405	0.109417	0.123208
Q8BH35	Complement component C8 beta chain OS=Mus musculus GN=C8b PE=1 SV=1 - [CO8B_MOUSE]	0.176037	0.230418	0.206725	0.247579
O70435	Proteasome subunit alpha type-3 OS=Mus musculus GN=Psma3 PE=1 SV=3 - [PSA3_MOUSE]	0.146733	0.0842569	0	0.0776496
P08607	C4b-binding protein OS=Mus musculus GN=C4bpa PE=1 SV=3 - [C4BPA_MOUSE]	0.144247	0.0464519	0	0
Q9JJH1	Ribonuclease 4 OS=Mus musculus GN=Rnase4 PE=1 SV=1 - [RNAS4_MOUSE]	0.143796	0	0	0
Q91WP6	Serine protease inhibitor A3N OS=Mus musculus GN=Serpina3n PE=1 SV=1 - [SPA3N_MOUSE]	0.142871	0.328839	0.365796	0.524722
P39876	Metalloproteinase inhibitor 3 OS=Mus musculus GN=Timp3 PE=1 SV=1 - [TIMP3_MOUSE]	0.139832	0	0	0
Q61703	Inter-alpha-trypsin inhibitor heavy chain H2 OS=Mus musculus GN=Itih2 PE=1 SV=1 - [ITIH2_MOUSE]	0.133171	0.0971738	0.103987	0.214349
P06909	Complement factor H OS=Mus musculus GN=Cfh PE=1 SV=2 - [CFAH_MOUSE]	0.12548	0.103945	0.0564764	0.0311818
P97298	Pigment epithelium-derived factor OS=Mus musculus GN=Serpinf1 PE=1 SV=2 - [PEDF_MOUSE]	0.125447	0.0345099	0	0.122775
Q91WP0	Mannan-binding lectin serine protease 2 OS=Mus musculus GN=Masp2 PE=1 SV=1 - [MASP2_MOUSE]	0.120804	0.117565	0.059056	0.0636785
Q91Y47	Coagulation factor XI OS=Mus musculus GN=F11 PE=2 SV=2 - [FA11_MOUSE]	0.118608	0.022863	0.0870355	0.0248668
P28666	Murinoglobulin-2 OS=Mus musculus GN=Mug2 PE=1 SV=2 - [MUG2_MOUSE]	0.117205	0.195084	0.177086	0.169442
P01637	Ig kappa chain V-V region T1 OS=Mus musculus PE=4 SV=1 - [KV5A5_MOUSE]	0.113449	0	0	0
Q61805	Lipopolysaccharide-binding protein OS=Mus musculus GN=Lbp PE=1 SV=2 - [LBP_MOUSE]	0.109872	0.152297	0.135833	0.144131
Q01339	Beta-2-glycoprotein 1 OS=Mus musculus GN=Apoh PE=1 SV=1 - [APOH_MOUSE]	0.10793	0	0.0461932	0
O88783	Coagulation factor V OS=Mus musculus GN=F5 PE=1 SV=1 - [FA5_MOUSE]	0.104096	0.127817	0.175294	0.1537
Q61702	Inter-alpha-trypsin inhibitor heavy chain H1 OS=Mus musculus GN=Itih1 PE=1 SV=2 - [ITIH1_MOUSE]	0.0992063	0.154552	0.215594	0.257392
P08071	Lactotransferrin OS=Mus musculus GN=Ltf PE=1 SV=4 - [TRFL_MOUSE]	0.095481	0.0456233	0.0894932	0.148874
Q8K182	Complement component C8 alpha chain OS=Mus musculus GN=C8a PE=1 SV=1 - [CO8A_MOUSE]	0.0877728	0.143702	0.156843	0.178923
A2AQ07	Tubulin beta-1 chain OS=Mus musculus GN=Tubb1 PE=1 SV=1 - [TBB1_MOUSE]	0.0826315	0.121422	0.120419	0.212533
P63017	Heat shock cognate 71 kDa protein OS=Mus musculus GN=Hspa8 PE=1 SV=1 - [HSP7C_MOUSE]	0.0822509	0.0450261	0.158822	0
O88844	Isocitrate dehydrogenase [NADP] cytoplasmic OS=Mus musculus GN=Idh1 PE=1 SV=2 - [IDHC_MOUSE]	0.0711884	0	0.173515	0.192503
P50446	Keratin, type II cytoskeletal 6A OS=Mus musculus GN=Krt6a PE=1 SV=3 - [K2C6A_MOUSE]	0.0697492	0.0806699	0.102365	0.0438701
Q9JHH6	Carboxypeptidase B2 OS=Mus musculus GN=Cpb2 PE=1 SV=1 - [CBPB2_MOUSE]	0.0679887	0.0326484	0.0463562	0
P29699	Alpha-2-HS-glycoprotein OS=Mus musculus GN=Ahsg PE=1 SV=1 - [FETUA_MOUSE]	0.0655856	0	0.0716884	0.164678
O09061	Proteasome subunit beta type-1 OS=Mus musculus GN=Psmb1 PE=1 SV=1 - [PSB1_MOUSE]	0.0641076	0.22541	0.0859038	0.14944
P04104	Keratin, type II cytoskeletal 1 OS=Mus musculus GN=Krt1 PE=1 SV=4 - [K2C1_MOUSE]	0.0635295	0.0933525	0.075316	0.103331
P49722	Proteasome subunit alpha type-2 OS=Mus musculus GN=Psma2 PE=1 SV=3 - [PSA2_MOUSE]	0.0629468	0.413904	0	0.100402
P70274	Selenoprotein P OS=Mus musculus GN=Sepp1 PE=1 SV=3 - [SEPP1_MOUSE]	0.0593687	0	0	0
P26262	Plasma kallikrein OS=Mus musculus GN=Klkb1 PE=1 SV=2 - [KLKB1_MOUSE]	0.0579796	0	0	0
Q07235	Glia-derived nexin OS=Mus musculus GN=Serpine2 PE=1 SV=2 - [GDN_MOUSE]	0.0573652	0.303275	0.386569	0.426116
Q9DBB9	Carboxypeptidase N subunit 2 OS=Mus musculus GN=Cpn2 PE=1 SV=2 - [CPN2_MOUSE]	0.0539691	0.0395727	0	0.0729389
P26039	Talin-1 OS=Mus musculus GN=Tln1 PE=1 SV=2 - [TLN1_MOUSE]	0.0522807	0.0996634	0.140784	0.132926
Q61147	Ceruloplasmin OS=Mus musculus GN=Cp PE=1 SV=2 - [CERU_MOUSE]	0.047874	0.0652092	0.0368107	0.0429726
P21614	Vitamin D-binding protein OS=Mus musculus GN=Gc PE=1 SV=2 - [VTDB_MOUSE]	0.0473138	0	0	0.0897168
Q8K1B8	Fermitin family homolog 3 OS=Mus musculus GN=Fermt3 PE=1 SV=1 - [URP2_MOUSE]	0.0439302	0.0598801	0.145637	0.150101
Q8VDD5	Myosin-9 OS=Mus musculus GN=Myh9 PE=1 SV=4 - [MYH9_MOUSE]	0.0439034	0.0541099	0.0833708	0.0880852
P06684	Complement C5 OS=Mus musculus GN=C5 PE=1 SV=2 - [CO5_MOUSE]	0.0351829	0.209544	0.0986469	0.13524
Q8VCM7	Fibrinogen gamma chain OS=Mus musculus GN=Fgg PE=1 SV=1 - [FIBG_MOUSE]	0.0342297	0	0	0
Q61704	Inter-alpha-trypsin inhibitor heavy chain H3 OS=Mus musculus GN=Itih3 PE=1 SV=3 - [ITIH3_MOUSE]	0.033441	0.0160585	0	0
P04919	Band 3 anion transport protein OS=Mus musculus GN=Slc4a1 PE=1 SV=1 - [B3AT_MOUSE]	0.0322165	0.0516486	0.0479104	0.021386
Q61247	Alpha-2-antiplasmin OS=Mus musculus GN=Serpinf2 PE=1 SV=1 - [A2AP_MOUSE]	0.0307547	0.0435372	0	0
Q3TTY5	Keratin, type II cytoskeletal 2 epidermal OS=Mus musculus GN=Krt2 PE=1 SV=1 - [K22E_MOUSE]	0.0238372	0.0224964	0	0
Q8BH61	Coagulation factor XIII A chain OS=Mus musculus GN=F13a1 PE=1 SV=3 - [F13A_MOUSE]	0.0203185	0.0853576	0.0837174	0.115584
E9Q414	Apolipoprotein B-100 OS=Mus musculus GN=Apob PE=1 SV=1 - [APOB_MOUSE]	0.0196242	0.0649615	0.0594749	0.0484383
P11276	Fibronectin OS=Mus musculus GN=Fn1 PE=1 SV=4 - [FINC_MOUSE]	0.0182871	0.177704	0.0823393	0.084174
Q6URW6	Myosin-14 OS=Mus musculus GN=Myh14 PE=1 SV=1 - [MYH14_MOUSE]	0.00739594	0	0	0
P01647	Ig kappa chain V-V region HP 124E1 OS=Mus musculus PE=1 SV=1 - [KV5AE_MOUSE]	0	1.78071	0.44725	1.77221
P01668	Ig kappa chain V-III region PC 7210 OS=Mus musculus PE=1 SV=1 - [KV3AG_MOUSE]	0	0.906556	0.826966	1.31914
P18528	Ig heavy chain V region 6.96 OS=Mus musculus PE=4 SV=1 - [HVM57_MOUSE]	0	0.621839	0.486186	0.873736
P01662	Ig kappa chain V-III region ABPC 22/PC 9245 OS=Mus musculus PE=1 SV=1 - [KV3AA_MOUSE]	0	0.589826	0.336281	0.18317
P01629	Ig kappa chain V-II region 2S1.3 OS=Mus musculus PE=1 SV=1 - [KV2A4_MOUSE]	0	0.581171	0.278065	0.142003
P01628	Ig kappa chain V-II region MOPC 511 OS=Mus musculus PE=1 SV=1 - [KV2A3_MOUSE]	0	0.553951	0.486062	0.403628
P01630	Ig kappa chain V-II region 7S34.1 OS=Mus musculus PE=1 SV=1 - [KV2A6_MOUSE]	0	0.504526	0.324046	0.384818
P18524	Ig heavy chain V region RF OS=Mus musculus PE=1 SV=1 - [HVM53_MOUSE]	0	0.476034	0.541428	0.37376
P01642	Ig kappa chain V-V region L7 (Fragment) OS=Mus musculus GN=Gm10881 PE=1 SV=1 - [KV5A9_MOUSE]	0	0.422251	0.661061	0.537386
P03977	Ig kappa chain V-III region 50S10.1 OS=Mus musculus PE=1 SV=1 - [KV3A4_MOUSE]	0	0.397482	0.444394	0.641045
P02089	Hemoglobin subunit beta-2 OS=Mus musculus GN=Hbb-b2 PE=1 SV=2 - [HBB2_MOUSE]	0	0.385719	0.453871	0.208364
P12246	Serum amyloid P-component OS=Mus musculus GN=Apcs PE=1 SV=2 - [SAMP_MOUSE]	0	0.375504	0.342538	0.483516
P84751	Ig heavy chain Mem5 (Fragment) OS=Mus musculus PE=1 SV=1 - [HVM63_MOUSE]	0	0.30859	0.699832	0.926407
P29391	Ferritin light chain 1 OS=Mus musculus GN=Ftl1 PE=1 SV=2 - [FRIL1_MOUSE]	0	0.247408	0	0
P04940	Ig kappa chain V-VI region NQ2-17.4.1 OS=Mus musculus PE=2 SV=1 - [KV6A6_MOUSE]	0	0.207018	0	0
P01723	Ig lambda-1 chain V region OS=Mus musculus PE=1 SV=2 - [LV1A_MOUSE]	0	0.195823	0	0
P68368	Tubulin alpha-4A chain OS=Mus musculus GN=Tuba4a PE=1 SV=1 - [TBA4A_MOUSE]	0	0.190203	0.225463	0.236822
P11679	Keratin, type II cytoskeletal 8 OS=Mus musculus GN=Krt8 PE=1 SV=4 - [K2C8_MOUSE]	0	0.174022	0.106901	0.104029
P14847	C-reactive protein OS=Mus musculus GN=Crp PE=1 SV=2 - [CRP_MOUSE]	0	0.171491	0.140684	0.0684308
P06728	Apolipoprotein A-IV OS=Mus musculus GN=Apoa4 PE=1 SV=3 - [APOA4_MOUSE]	0	0.157727	0.149349	0
P26041	Moesin OS=Mus musculus GN=Msn PE=1 SV=3 - [MOES_MOUSE]	0	0.145435	0.195973	0.212877
P40240	CD9 antigen OS=Mus musculus GN=Cd9 PE=1 SV=2 - [CD9_MOUSE]	0	0.140603	0	0
Q9R1P3	Proteasome subunit beta type-2 OS=Mus musculus GN=Psmb2 PE=1 SV=1 - [PSB2_MOUSE]	0	0.139311	0	0.09629
Q9R1P1	Proteasome subunit beta type-3 OS=Mus musculus GN=Psmb3 PE=1 SV=1 - [PSB3_MOUSE]	0	0.138961	0	0.07557
Q9Z2U1	Proteasome subunit alpha type-5 OS=Mus musculus GN=Psma5 PE=1 SV=1 - [PSA5_MOUSE]	0	0.134459	0	0.0835125
P62962	Profilin-1 OS=Mus musculus GN=Pfn1 PE=1 SV=2 - [PROF1_MOUSE]	0	0.130751	0	0
P84750	Ig kappa chain V region Mem5 (Fragment) OS=Mus musculus PE=1 SV=1 - [KVM5_MOUSE]	0	0.12041	0	0.130964
Q91X72	Hemopexin OS=Mus musculus GN=Hpx PE=1 SV=2 - [HEMO_MOUSE]	0	0.115838	0.214648	0.0845415
Q922U2	Keratin, type II cytoskeletal 5 OS=Mus musculus GN=Krt5 PE=1 SV=1 - [K2C5_MOUSE]	0	0.103326	0	0
P02535	Keratin, type I cytoskeletal 10 OS=Mus musculus GN=Krt10 PE=1 SV=3 - [K1C10_MOUSE]	0	0.102897	0.0463167	0.0450582
O35522	Proteasome subunit beta type-9 OS=Mus musculus bactrianus GN=Psmb9 PE=1 SV=1 - [PSB9_MUSMB]	0	0.102163	0	0
P17182	Alpha-enolase OS=Mus musculus GN=Eno1 PE=1 SV=3 - [ENOA_MOUSE]	0	0.0960736	0.109926	0.0701822
P17156	Heat shock-related 70 kDa protein 2 OS=Mus musculus GN=Hspa2 PE=1 SV=2 - [HSP72_MOUSE]	0	0.0842432	0	0.0848838
O35955	Proteasome subunit beta type-10 OS=Mus musculus GN=Psmb10 PE=1 SV=1 - [PSB10_MOUSE]	0	0.0823484	0	0
P68373	Tubulin alpha-1C chain OS=Mus musculus GN=Tuba1c PE=1 SV=1 - [TBA1C_MOUSE]	0	0.0783682	0.202835	0.154676
P54116	Erythrocyte band 7 integral membrane protein OS=Mus musculus GN=Stom PE=1 SV=3 - [STOM_MOUSE]	0	0.0762804	0.0852833	0
Q61781	Keratin, type I cytoskeletal 14 OS=Mus musculus GN=Krt14 PE=1 SV=2 - [K1C14_MOUSE]	0	0.0754505	0	0
Q9QUM0	Integrin alpha-IIb OS=Mus musculus GN=Itga2b PE=1 SV=2 - [ITA2B_MOUSE]	0	0.0717102	0.0438526	0.0776524
Q8VED5	Keratin, type II cytoskeletal 79 OS=Mus musculus GN=Krt79 PE=1 SV=2 - [K2C79_MOUSE]	0	0.0693075	0	0
Q8BTM8	Filamin-A OS=Mus musculus GN=Flna PE=1 SV=5 - [FLNA_MOUSE]	0	0.0681715	0.0558831	0.0653117
Q9QWL7	Keratin, type I cytoskeletal 17 OS=Mus musculus GN=Krt17 PE=1 SV=3 - [K1C17_MOUSE]	0	0.0662568	0	0
Q6IFX2	Keratin, type I cytoskeletal 42 OS=Mus musculus GN=Krt42 PE=1 SV=1 - [K1C42_MOUSE]	0	0.0636518	0	0
P70194	C-type lectin domain family 4 member F OS=Mus musculus GN=Clec4f PE=1 SV=1 - [CLC4F_MOUSE]	0	0.0579602	0.0369753	0
Q9Z2U0	Proteasome subunit alpha type-7 OS=Mus musculus GN=Psma7 PE=1 SV=1 - [PSA7_MOUSE]	0	0.05728	0	0
P06745	Glucose-6-phosphate isomerase OS=Mus musculus GN=Gpi PE=1 SV=4 - [G6PI_MOUSE]	0	0.0565774	0.0645135	0.0627883
P99026	Proteasome subunit beta type-4 OS=Mus musculus GN=Psmb4 PE=1 SV=1 - [PSB4_MOUSE]	0	0.0548001	0	0.0894046
Q9R1P4	Proteasome subunit alpha type-1 OS=Mus musculus GN=Psma1 PE=1 SV=1 - [PSA1_MOUSE]	0	0.0540012	0	0
P49182	Heparin cofactor 2 OS=Mus musculus GN=Serpind1 PE=1 SV=1 - [HEP2_MOUSE]	0	0.0538285	0.0327335	0.0318441
P70389	Insulin-like growth factor-binding protein complex acid labile subunit OS=Mus musculus GN=Igfals PE=1 SV=1 - [ALS_MOUSE]	0	0.0530343	0.0737937	0.0847729
Q9JHI0	Matrix metalloproteinase-19 OS=Mus musculus GN=Mmp19 PE=2 SV=1 - [MMP19_MOUSE]	0	0.0496171	0.0684907	0.0373066
P05214	Tubulin alpha-3 chain OS=Mus musculus GN=Tuba3a PE=1 SV=1 - [TBA3_MOUSE]	0	0.0479055	0	0.0868403
P01898	H-2 class I histocompatibility antigen, Q10 alpha chain OS=Mus musculus GN=H2-Q10 PE=1 SV=3 - [HA10_MOUSE]	0	0.0428324	0	0
Q61646	Haptoglobin OS=Mus musculus GN=Hp PE=1 SV=1 - [HPT_MOUSE]	0	0.0411733	0.0460327	0.12409
Q61414	Keratin, type I cytoskeletal 15 OS=Mus musculus GN=Krt15 PE=1 SV=2 - [K1C15_MOUSE]	0	0.0397988	0.0363029	0
Q9JM99	Proteoglycan 4 OS=Mus musculus GN=Prg4 PE=1 SV=2 - [PRG4_MOUSE]	0	0.0390439	0.0795822	0.0149605
P06683	Complement component C9 OS=Mus musculus GN=C9 PE=1 SV=2 - [CO9_MOUSE]	0	0.038601	0.0287712	0.0279894
O70362	Phosphatidylinositol-glycan-specific phospholipase D OS=Mus musculus GN=Gpld1 PE=1 SV=1 - [PHLD_MOUSE]	0	0.0380803	0	0.0473033
P10852	4F2 cell-surface antigen heavy chain OS=Mus musculus GN=Slc3a2 PE=1 SV=1 - [4F2_MOUSE]	0	0.0335231	0	0
P24270	Catalase OS=Mus musculus GN=Cat PE=1 SV=4 - [CATA_MOUSE]	0	0.0327055	0	0
Q00519	Xanthine dehydrogenase/oxidase OS=Mus musculus GN=Xdh PE=1 SV=5 - [XDH_MOUSE]	0	0.0163299	0	0
Q9R1E6	Ectonucleotide pyrophosphatase/phosphodiesterase family member 2 OS=Mus musculus GN=Enpp2 PE=1 SV=3 - [ENPP2_MOUSE]	0	0.0161355	0.0409501	0.0175497
Q7TPR4	Alpha-actinin-1 OS=Mus musculus GN=Actn1 PE=1 SV=1 - [ACTN1_MOUSE]	0	0.0154804	0	0
Q61768	Kinesin-1 heavy chain OS=Mus musculus GN=Kif5b PE=1 SV=3 - [KINH_MOUSE]	0	0.0145642	0	0
B2RPV6	Multimerin-1 OS=Mus musculus GN=Mmrn1 PE=1 SV=2 - [MMRN1_MOUSE]	0	0.0117228	0.0131064	0
P01796	Ig heavy chain V-III region A4 OS=Mus musculus PE=1 SV=1 - [HVM27_MOUSE]	0	0	0.804293	0.435032
P31725	Protein S100-A9 OS=Mus musculus GN=S100a9 PE=1 SV=3 - [S10A9_MOUSE]	0	0	0.378682	0
P26040	Ezrin OS=Mus musculus GN=Ezr PE=1 SV=3 - [EZRI_MOUSE]	0	0	0.187874	0.0635562
P43025	Tetranectin OS=Mus musculus GN=Clec3b PE=1 SV=2 - [TETN_MOUSE]	0	0	0.101785	0
P17742	Peptidyl-prolyl cis-trans isomerase A OS=Mus musculus GN=Ppia PE=1 SV=2 - [PPIA_MOUSE]	0	0	0.099262	0
P52430	Serum paraoxonase/arylesterase 1 OS=Mus musculus GN=Pon1 PE=1 SV=2 - [PON1_MOUSE]	0	0	0.0858878	0
P08730	Keratin, type I cytoskeletal 13 OS=Mus musculus GN=Krt13 PE=1 SV=2 - [K1C13_MOUSE]	0	0	0.0474396	0.0545097
Q9JKR6	Hypoxia up-regulated protein 1 OS=Mus musculus GN=Hyou1 PE=1 SV=1 - [HYOU1_MOUSE]	0	0	0.020376	0.0156085
P01670	Ig kappa chain V-III region PC 6684 OS=Mus musculus PE=1 SV=1 - [KV3AI_MOUSE]	0	0	0	0.792768
Q8K1I3	Secreted phosphoprotein 24 OS=Mus musculus GN=Spp2 PE=1 SV=2 - [SPP24_MOUSE]	0	0	0	0.112513
P21550	Beta-enolase OS=Mus musculus GN=Eno3 PE=1 SV=3 - [ENOB_MOUSE]	0	0	0	0.083807
Q9DCD0	6-phosphogluconate dehydrogenase, decarboxylating OS=Mus musculus GN=Pgd PE=1 SV=3 - [6PGD_MOUSE]	0	0	0	0.041423
Q9Z2K1	Keratin, type I cytoskeletal 16 OS=Mus musculus GN=Krt16 PE=1 SV=3 - [K1C16_MOUSE]	0	0	0	0.033627
P82198	Transforming growth factor-beta-induced protein ig-h3 OS=Mus musculus GN=Tgfbi PE=1 SV=1 - [BGH3_MOUSE]	0	0	0	0.0295675
Q9QUM9	Proteasome subunit alpha type-6 OS=Mus musculus GN=Psma6 PE=1 SV=1 - [PSA6_MOUSE]	0	0	0	0
P06151	L-lactate dehydrogenase A chain OS=Mus musculus GN=Ldha PE=1 SV=3 - [LDHA_MOUSE]	0	0	0	0
P16858	Glyceraldehyde-3-phosphate dehydrogenase OS=Mus musculus GN=Gapdh PE=1 SV=2 - [G3P_MOUSE]	0	0	0	0
P16627	Heat shock 70 kDa protein 1-like OS=Mus musculus GN=Hspa1l PE=1 SV=4 - [HS71L_MOUSE]	0	0	0	0
Q6GQT1	Alpha-2-macroglobulin-P OS=Mus musculus GN=A2m PE=2 SV=2 - [A2MG_MOUSE]	0	0	0	0
P01627	Ig kappa chain V-II region VKappa167 OS=Mus musculus GN=Gm5153 PE=4 SV=1 - [KV2A2_MOUSE]	0	0	0	0
P11983	T-complex protein 1 subunit alpha OS=Mus musculus GN=Tcp1 PE=1 SV=3 - [TCPA_MOUSE]	0	0	0	0
Q9DBD0	Inhibitor of carbonic anhydrase OS=Mus musculus GN=Ica PE=1 SV=1 - [ICA_MOUSE]	0	0	0	0
O54890	Integrin beta-3 OS=Mus musculus GN=Itgb3 PE=1 SV=2 - [ITB3_MOUSE]	0	0	0	0
P01634	Ig kappa chain V-V region MOPC 21 OS=Mus musculus PE=1 SV=1 - [KV5A2_MOUSE]	0	0	0	0
P01632	Ig kappa chain V-I region S107A OS=Mus musculus GN=Igkv7-33 PE=2 SV=1 - [KV1A1_MOUSE]	0	0	0	0
O88803	Leukocyte cell-derived chemotaxin-2 OS=Mus musculus GN=Lect2 PE=1 SV=1 - [LECT2_MOUSE]	0	0	0	0

## Sheet: Statistic analysis
		0h/CitA										8h/CitA										24h/CitA											8h/0h										24h/0h
Accession	Description	p value		Ratio								p value		Ratio								p value		Ratio									p value		Ratio		0h	8h					p value		Ratio		0h	24h
Ig kappa chain V-V region HP 124E1 OS=Mus musculus PE=1 SV=1 - [KV5AE_MOUSE]	P01647	0.0128861	1.88988	35.5538	5.15193	0	1.78071	1.78071		Ig kappa chain V-III region PC 7210 OS=Mus musculus PE=1 SV=1 - [KV3AG_MOUSE]	P01668	0.00726558	2.13873	23.3225	4.54365	0	0.826966	0.826966		Ig kappa chain V-III region PC 7210 OS=Mus musculus PE=1 SV=1 - [KV3AG_MOUSE]	P01668	0.00609677	2.2149	37.0654	5.212	0	1.31914	1.31914			Ig kappa chain V-V region HP 124E1 OS=Mus musculus PE=1 SV=1 - [KV5AE_MOUSE]	P01647	0.401277	0.396556	8.59275	3.10312	1.78071	0.44725	1.78071		Ig kappa chain V-II region 2S1,3 OS=Mus musculus PE=1 SV=1 - [KV2A4_MOUSE]	P01629	0.371759	0.429739	6.0255	2.59108	0.581171	0.142003	0.581171
Ig kappa chain V-III region PC 7210 OS=Mus musculus PE=1 SV=1 - [KV3AG_MOUSE]	P01668	0.0132166	1.87888	24.7483	4.62926	0	0.906556	0.906556		Ig heavy chain Mem5 (Fragment) OS=Mus musculus PE=1 SV=1 - [HVM63_MOUSE]	P84751	0.0207238	1.68353	19.063	4.2527	0	0.699832	0.699832		Ig kappa chain V-V region HP 124E1 OS=Mus musculus PE=1 SV=1 - [KV5AE_MOUSE]	P01647	0.0124248	1.90571	35.4947	5.14953	0	1.77221	1.77221			Alpha-1-antitrypsin 1-2 OS=Mus musculus GN=Serpina1b PE=1 SV=2 - [A1AT2_MOUSE]	P22599	0.141601	0.848933	7.045	2.8166	0.399648	0	0.399648		Ig heavy chain V-III region J606 OS=Mus musculus PE=1 SV=1 - [HVM32_MOUSE]	P01801	0.410602	0.386579	4.75077	2.24816	1.53073	0.677341	1.53073
Ig kappa chain V-II region MOPC 511 OS=Mus musculus PE=1 SV=1 - [KV2A3_MOUSE]	P01628	0.00559745	2.25201	19.4994	4.28536	0	0.553951	0.553951		Ig kappa chain V-II region MOPC 511 OS=Mus musculus PE=1 SV=1 - [KV2A3_MOUSE]	P01628	0.00496558	2.30403	17.1892	4.10343	0	0.486062	0.486062		Ig heavy chain V region 6,96 OS=Mus musculus PE=4 SV=1 - [HVM57_MOUSE]	P18528	0.00696049	2.15736	23.8936	4.57855	0	0.873736	0.873736			Ferritin light chain 1 OS=Mus musculus GN=Ftl1 PE=1 SV=2 - [FRIL1_MOUSE]	P29391	0.28355	0.54737	5.85898	2.55065	0.247408	0	0.247408		Ig kappa chain V-III region ABPC 22/PC 9245 OS=Mus musculus PE=1 SV=1 - [KV3AA_MOUSE]	P01662	0.348345	0.457991	4.33163	2.11491	0.589826	0.18317	0.589826
Ig kappa chain V-III region ABPC 22/PC 9245 OS=Mus musculus PE=1 SV=1 - [KV3AA_MOUSE]	P01662	0.00668929	2.17462	18.1053	4.17834	0	0.589826	0.589826		Ig kappa chain V-V region L7 (Fragment) OS=Mus musculus GN=Gm10881 PE=1 SV=1 - [KV5A9_MOUSE]	P01642	0.0225092	1.64764	15.946	3.99512	0	0.661061	0.661061		Ig heavy chain Mem5 (Fragment) OS=Mus musculus PE=1 SV=1 - [HVM63_MOUSE]	P84751	0.0348506	1.45779	23.1603	4.53358	0	0.926407	0.926407			Ig heavy chain V-III region J606 OS=Mus musculus PE=1 SV=1 - [HVM32_MOUSE]	P01801	0.421905	0.374785	5.11857	2.35574	1.53073	0.69626	1.53073		Ferritin light chain 1 OS=Mus musculus GN=Ftl1 PE=1 SV=2 - [FRIL1_MOUSE]	P29391	0.0852884	1.06911	3.67361	1.8772	0.247408	0	0.247408
Ig kappa chain V-II region 7S34,1 OS=Mus musculus PE=1 SV=1 - [KV2A6_MOUSE]	P01630	0.0204066	1.69023	16.4625	4.04111	0	0.504526	0.504526		Protein S100-A9 OS=Mus musculus GN=S100a9 PE=1 SV=3 - [S10A9_MOUSE]	P31725	0.00624295	2.20461	12.7401	3.6713	0	0.378682	0.378682		Serum amyloid P-component OS=Mus musculus GN=Apcs PE=1 SV=2 - [SAMP_MOUSE]	P12246	0.000507996	3.29414	14.1347	3.82117	0	0.483516	0.483516			Proteasome subunit alpha type-2 OS=Mus musculus GN=Psma2 PE=1 SV=3 - [PSA2_MOUSE]	P49722	0.346754	0.459978	5.07993	2.34481	0.413904	0	0.413904		CD9 antigen OS=Mus musculus GN=Cd9 PE=1 SV=2 - [CD9_MOUSE]	P40240	0.00191139	2.71865	3.36596	1.75102	0.140603	0	0.140603
Ig kappa chain V-II region 2S1,3 OS=Mus musculus PE=1 SV=1 - [KV2A4_MOUSE]	P01629	0.00473991	2.32423	14.1435	3.82207	0	0.581171	0.581171		Hemoglobin subunit beta-2 OS=Mus musculus GN=Hbb-b2 PE=1 SV=2 - [HBB2_MOUSE]	P02089	0.0477189	1.32131	12.2591	3.61578	0	0.453871	0.453871		Ig kappa chain V-V region L7 (Fragment) OS=Mus musculus GN=Gm10881 PE=1 SV=1 - [KV5A9_MOUSE]	P01642	0.0055372	2.25671	13.8804	3.79498	0	0.537386	0.537386			Ig heavy chain V region J539 OS=Mus musculus PE=1 SV=1 - [HVM40_MOUSE]	P01810	0.475148	0.323171	4.41159	2.1413	0.670545	0.269467	0.670545		Apolipoprotein A-IV OS=Mus musculus GN=Apoa4 PE=1 SV=3 - [APOA4_MOUSE]	P06728	0.122023	0.91356	3.08765	1.62651	0.157727	0	0.157727
Ig kappa chain V-V region L7 (Fragment) OS=Mus musculus GN=Gm10881 PE=1 SV=1 - [KV5A9_MOUSE]	P01642	0.00840795	2.07531	10.8534	3.44008	0	0.422251	0.422251		Ig heavy chain V region RF OS=Mus musculus PE=1 SV=1 - [HVM53_MOUSE]	P18524	0.00889754	2.05073	11.4759	3.52054	0	0.541428	0.541428		Ig kappa chain V-II region MOPC 511 OS=Mus musculus PE=1 SV=1 - [KV2A3_MOUSE]	P01628	0.0185323	1.73207	13.6589	3.77177	0	0.403628	0.403628			Ig kappa chain V-II region 2S1,3 OS=Mus musculus PE=1 SV=1 - [KV2A4_MOUSE]	P01629	0.465727	0.331869	3.95544	1.98384	0.581171	0.278065	0.581171		Complement C1s-B subcomponent OS=Mus musculus GN=C1sb PE=2 SV=1 - [CS1B_MOUSE]	Q8CFG8	0.501992	0.299303	3.0755	1.62082	0.523062	0.282824	0.523062
Serum amyloid P-component OS=Mus musculus GN=Apcs PE=1 SV=2 - [SAMP_MOUSE]	P12246	0.00681569	2.16649	10.7859	3.43108	0	0.375504	0.375504		Ig kappa chain V-II region 7S34,1 OS=Mus musculus PE=1 SV=1 - [KV2A6_MOUSE]	P01630	0.0203695	1.69102	10.8166	3.43518	0	0.324046	0.324046		Ig kappa chain V-II region 7S34,1 OS=Mus musculus PE=1 SV=1 - [KV2A6_MOUSE]	P01630	0.0166617	1.77828	12.8928	3.68849	0	0.384818	0.384818			Proteasome subunit alpha type-5 OS=Mus musculus GN=Psma5 PE=1 SV=1 - [PSA5_MOUSE]	Q9Z2U1	0.0649068	1.18771	3.86825	1.95168	0.134459	0	0.134459		Proteasome subunit alpha type-2 OS=Mus musculus GN=Psma2 PE=1 SV=3 - [PSA2_MOUSE]	P49722	0.0543138	1.26509	3.06339	1.61513	0.413904	0.100402	0.413904
Hemoglobin subunit beta-2 OS=Mus musculus GN=Hbb-b2 PE=1 SV=2 - [HBB2_MOUSE]	P02089	0.0423019	1.37364	10.7721	3.42923	0	0.385719	0.385719		Ig kappa chain V-III region ABPC 22/PC 9245 OS=Mus musculus PE=1 SV=1 - [KV3AA_MOUSE]	P01662	0.0109577	1.96028	10.3023	3.3649	0	0.336281	0.336281		Ig kappa chain V-III region PC 6684 OS=Mus musculus PE=1 SV=1 - [KV3AI_MOUSE]	P01670	0.326978	0.485481	8.34707	3.06127	0	0.792768	0.792768			Ig kappa chain V-VI region NQ2-17,4,1 OS=Mus musculus PE=2 SV=1 - [KV6A6_MOUSE]	P04940	0.375901	0.424927	3.79248	1.92314	0.207018	0	0.207018		Alpha-1-antitrypsin 1-2 OS=Mus musculus GN=Serpina1b PE=1 SV=2 - [A1AT2_MOUSE]	P22599	0.469506	0.328359	2.92866	1.55024	0.399648	0.188733	0.399648
Ig heavy chain V region RF OS=Mus musculus PE=1 SV=1 - [HVM53_MOUSE]	P18524	0.0101202	1.99481	10.0839	3.33398	0	0.476034	0.476034		Serum amyloid P-component OS=Mus musculus GN=Apcs PE=1 SV=2 - [SAMP_MOUSE]	P12246	0.000337901	3.47121	10.0224	3.32515	0	0.342538	0.342538		Ig heavy chain V region 3-6 OS=Mus musculus GN=Ighv3-6 PE=1 SV=1 - [HVM60_MOUSE]	P18531	0.253029	0.596829	8.26996	3.04788	0.186944	0.818662	0.818662			Proteasome subunit beta type-10 OS=Mus musculus GN=Psmb10 PE=1 SV=1 - [PSB10_MOUSE]	O35955	0.271166	0.566764	2.99881	1.58439	0.0823484	0	0.0823484		Keratin, type II cytoskeletal 5 OS=Mus musculus GN=Krt5 PE=1 SV=1 - [K2C5_MOUSE]	Q922U2	0.421045	0.375672	2.74729	1.45801	0.103326	0	0.103326
Ig heavy chain V region 3-6 OS=Mus musculus GN=Ighv3-6 PE=1 SV=1 - [HVM60_MOUSE]	P18531	0.245798	0.609421	8.83494	3.14322	0.186944	0.88824	0.88824		Ig heavy chain V region 3-6 OS=Mus musculus GN=Ighv3-6 PE=1 SV=1 - [HVM60_MOUSE]	P18531	0.237532	0.624277	9.17845	3.19825	0.186944	0.909299	0.909299		Ig heavy chain V region RF OS=Mus musculus PE=1 SV=1 - [HVM53_MOUSE]	P18524	0.0137534	1.86159	7.89736	2.98137	0	0.37376	0.37376			Complement C1s-B subcomponent OS=Mus musculus GN=C1sb PE=2 SV=1 - [CS1B_MOUSE]	Q8CFG8	0.451015	0.345809	2.65435	1.40836	0.523062	0.244208	0.523062		Hemoglobin subunit beta-2 OS=Mus musculus GN=Hbb-b2 PE=1 SV=2 - [HBB2_MOUSE]	P02089	0.535889	0.270925	2.7338	1.45091	0.385719	0.208364	0.385719
Fibronectin OS=Mus musculus GN=Fn1 PE=1 SV=4 - [FINC_MOUSE]	P11276	0.0653883	1.1845	8.3284	3.05804	0.0182871	0.177704	0.177704		Ig heavy chain V region MOPC 47A OS=Mus musculus PE=1 SV=1 - [HVM17_MOUSE]	P01786	0.281213	0.550965	7.2152	2.85104	0.195449	0.798768	0.798768		Ig heavy chain V region MOPC 47A OS=Mus musculus PE=1 SV=1 - [HVM17_MOUSE]	P01786	0.276562	0.558207	7.02194	2.81187	0.195449	0.741224	0.741224			Proteasome subunit beta type-3 OS=Mus musculus GN=Psmb3 PE=1 SV=1 - [PSB3_MOUSE]	Q9R1P1	0.467987	0.329766	2.65402	1.40818	0.138961	0	0.138961		Profilin-1 OS=Mus musculus GN=Pfn1 PE=1 SV=2 - [PROF1_MOUSE]	P62962	0.226414	0.645097	2.70392	1.43505	0.130751	0	0.130751
Ig heavy chain V region M511 OS=Mus musculus PE=1 SV=1 - [HVM21_MOUSE]	P01790	0.288222	0.540273	7.92049	2.98559	0.309591	1.15734	1.15734		Ig heavy chain V region 6,96 OS=Mus musculus PE=4 SV=1 - [HVM57_MOUSE]	P18528	0.28126	0.550892	7.13029	2.83396	0	0.486186	0.486186		Ig heavy chain V region M511 OS=Mus musculus PE=1 SV=1 - [HVM21_MOUSE]	P01790	0.31579	0.500602	6.79508	2.76449	0.309591	0.99313	0.99313			Proteasome subunit beta type-2 OS=Mus musculus GN=Psmb2 PE=1 SV=1 - [PSB2_MOUSE]	Q9R1P3	0.584264	0.233391	2.49405	1.31849	0.139311	0	0.139311		Ig kappa chain V-VI region NQ2-17,4,1 OS=Mus musculus PE=2 SV=1 - [KV6A6_MOUSE]	P04940	0.604809	0.218382	2.6934	1.42943	0.207018	0	0.207018
Ig heavy chain V region MOPC 47A OS=Mus musculus PE=1 SV=1 - [HVM17_MOUSE]	P01786	0.277901	0.55611	7.08835	2.82545	0.195449	0.759594	0.759594		Ig heavy chain V region M511 OS=Mus musculus PE=1 SV=1 - [HVM21_MOUSE]	P01790	0.309955	0.508701	7.05448	2.81854	0.309591	1.03811	1.03811		Ig kappa chain V-III region 50S10,1 OS=Mus musculus PE=1 SV=1 - [KV3A4_MOUSE]	P03977	0.452157	0.344711	6.00606	2.58642	0	0.641045	0.641045			Proteasome subunit alpha type-3 OS=Mus musculus GN=Psma3 PE=1 SV=3 - [PSA3_MOUSE]	O70435	0.521814	0.282484	2.47387	1.30677	0.0842569	0	0.0842569		Keratin, type I cytoskeletal 14 OS=Mus musculus GN=Krt14 PE=1 SV=2 - [K1C14_MOUSE]	Q61781	0.119586	0.922318	2.6882	1.42664	0.0754505	0	0.0754505
Ferritin light chain 1 OS=Mus musculus GN=Ftl1 PE=1 SV=2 - [FRIL1_MOUSE]	P29391	0.0160709	1.79396	6.78388	2.76211	0	0.247408	0.247408		Ig kappa chain V-III region 50S10,1 OS=Mus musculus PE=1 SV=1 - [KV3A4_MOUSE]	P03977	0.30651	0.513555	6.98205	2.80365	0	0.444394	0.444394		Tubulin alpha-4A chain OS=Mus musculus GN=Tuba4a PE=1 SV=1 - [TBA4A_MOUSE]	P68368	0.00468037	2.32972	5.98284	2.58083	0	0.236822	0.236822			Polymeric immunoglobulin receptor OS=Mus musculus GN=Pigr PE=1 SV=1 - [PIGR_MOUSE]	O70570	0.140959	0.850906	2.46586	1.30209	0.164998	0.0686262	0.164998		Polymeric immunoglobulin receptor OS=Mus musculus GN=Pigr PE=1 SV=1 - [PIGR_MOUSE]	O70570	0.233537	0.631645	2.26622	1.18029	0.164998	0.0769902	0.164998
Ig heavy chain V region 6,96 OS=Mus musculus PE=4 SV=1 - [HVM57_MOUSE]	P18528	0.366917	0.435432	6.71073	2.74647	0	0.621839	0.621839		Tubulin alpha-1C chain OS=Mus musculus GN=Tuba1c PE=1 SV=1 - [TBA1C_MOUSE]	P68373	0.00441347	2.35522	6.31232	2.65817	0	0.202835	0.202835		Glia-derived nexin OS=Mus musculus GN=Serpine2 PE=1 SV=2 - [GDN_MOUSE]	Q07235	0.0551226	1.25867	5.3001	2.40602	0.0573652	0.426116	0.426116			Keratin, type II cytoskeletal 5 OS=Mus musculus GN=Krt5 PE=1 SV=1 - [K2C5_MOUSE]	Q922U2	0.300602	0.522008	2.45517	1.29582	0.103326	0	0.103326		Ig lambda-1 chain V region OS=Mus musculus PE=1 SV=2 - [LV1A_MOUSE]	P01723	0.685932	0.163719	2.03638	1.02601	0.195823	0	0.195823
Complement C5 OS=Mus musculus GN=C5 PE=1 SV=2 - [CO5_MOUSE]	P06684	0.0143364	1.84356	5.82468	2.54218	0.0351829	0.209544	0.209544		Hemopexin OS=Mus musculus GN=Hpx PE=1 SV=2 - [HEMO_MOUSE]	Q91X72	0.0310928	1.50734	5.97004	2.57774	0	0.214648	0.214648		Moesin OS=Mus musculus GN=Msn PE=1 SV=3 - [MOES_MOUSE]	P26041	0.0182125	1.73963	4.59635	2.20049	0	0.212877	0.212877			Ig lambda-1 chain V region OS=Mus musculus PE=1 SV=2 - [LV1A_MOUSE]	P01723	0.543698	0.264642	2.41687	1.27314	0.195823	0	0.195823		C-reactive protein OS=Mus musculus GN=Crp PE=1 SV=2 - [CRP_MOUSE]	P14847	0.318313	0.497145	2.03099	1.02218	0.171491	0.0684308	0.171491
Ig kappa chain V-III region 50S10,1 OS=Mus musculus PE=1 SV=1 - [KV3A4_MOUSE]	P03977	0.373429	0.427792	5.65764	2.5002	0	0.397482	0.397482		Tubulin alpha-4A chain OS=Mus musculus GN=Tuba4a PE=1 SV=1 - [TBA4A_MOUSE]	P68368	0.014818	1.82921	5.61186	2.48848	0	0.225463	0.225463		Fibronectin OS=Mus musculus GN=Fn1 PE=1 SV=4 - [FINC_MOUSE]	P11276	0.00801124	2.0963	4.5617	2.18957	0.0182871	0.084174	0.084174			Proteasome subunit beta type-1 OS=Mus musculus GN=Psmb1 PE=1 SV=1 - [PSB1_MOUSE]	O09061	0.549278	0.260208	2.39765	1.26162	0.22541	0.0859038	0.22541		Heat shock cognate 71 kDa protein OS=Mus musculus GN=Hspa8 PE=1 SV=1 - [HSP7C_MOUSE]	P63017	0.101296	0.994406	1.99051	0.993141	0.0450261	0	0.0450261
Profilin-1 OS=Mus musculus GN=Pfn1 PE=1 SV=2 - [PROF1_MOUSE]	P62962	0.125097	0.902753	5.52763	2.46666	0	0.130751	0.130751		Ig heavy chain V-III region A4 OS=Mus musculus PE=1 SV=1 - [HVM27_MOUSE]	P01796	0.519862	0.284112	5.145	2.36317	0	0.804293	0.804293		Ig kappa chain V-III region ABPC 22/PC 9245 OS=Mus musculus PE=1 SV=1 - [KV3AA_MOUSE]	P01662	0.295166	0.529933	4.17979	2.06343	0	0.18317	0.18317			Profilin-1 OS=Mus musculus GN=Pfn1 PE=1 SV=2 - [PROF1_MOUSE]	P62962	0.516864	0.286624	2.32493	1.21719	0.130751	0	0.130751		Mannan-binding lectin serine protease 2 OS=Mus musculus GN=Masp2 PE=1 SV=1 - [MASP2_MOUSE]	Q91WP0	0.186664	0.72894	1.84301	0.882065	0.117565	0.0636785	0.117565
Apolipoprotein A-IV OS=Mus musculus GN=Apoa4 PE=1 SV=3 - [APOA4_MOUSE]	P06728	0.00365679	2.4369	5.41481	2.43691	0	0.157727	0.157727		Apolipoprotein A-IV OS=Mus musculus GN=Apoa4 PE=1 SV=3 - [APOA4_MOUSE]	P06728	0.0428706	1.36784	4.87172	2.28443	0	0.149349	0.149349		Secreted phosphoprotein 24 OS=Mus musculus GN=Spp2 PE=1 SV=2 - [SPP24_MOUSE]	Q8K1I3	0.101559	0.993283	4.12059	2.04285	0	0.112513	0.112513			Proteasome subunit beta type-9 OS=Mus musculus bactrianus GN=Psmb9 PE=1 SV=1 - [PSB9_MUSMB]	O35522	0.204847	0.688571	2.28371	1.19138	0.102163	0	0.102163		Fibronectin OS=Mus musculus GN=Fn1 PE=1 SV=4 - [FINC_MOUSE]	P11276	0.398081	0.400029	1.82573	0.868473	0.177704	0.084174	0.177704
Proteasome subunit alpha type-2 OS=Mus musculus GN=Psma2 PE=1 SV=3 - [PSA2_MOUSE]	P49722	0.254072	0.595043	5.41289	2.4364	0.0629468	0.413904	0.413904		Glia-derived nexin OS=Mus musculus GN=Serpine2 PE=1 SV=2 - [GDN_MOUSE]	Q07235	0.0518657	1.28512	4.87104	2.28423	0.0573652	0.386569	0.386569		Hemoglobin subunit beta-2 OS=Mus musculus GN=Hbb-b2 PE=1 SV=2 - [HBB2_MOUSE]	P02089	0.369937	0.431872	3.94031	1.97831	0	0.208364	0.208364			Complement C5 OS=Mus musculus GN=C5 PE=1 SV=2 - [CO5_MOUSE]	P06684	0.0535303	1.2714	2.1005	1.07073	0.209544	0.0986469	0.209544		Immunoglobulin J chain OS=Mus musculus GN=Jchain PE=1 SV=4 - [IGJ_MOUSE]	P01592	0.713848	0.146394	1.75335	0.810115	0.132865	0	0.132865
Tubulin alpha-4A chain OS=Mus musculus GN=Tuba4a PE=1 SV=1 - [TBA4A_MOUSE]	P68368	0.0130413	1.88468	4.76396	2.25216	0	0.190203	0.190203		Fibronectin OS=Mus musculus GN=Fn1 PE=1 SV=4 - [FINC_MOUSE]	P11276	0.0168904	1.77236	4.41918	2.14378	0.0182871	0.0823393	0.0823393		Hemopexin OS=Mus musculus GN=Hpx PE=1 SV=2 - [HEMO_MOUSE]	Q91X72	0.0679235	1.16798	3.89048	1.95995	0	0.0845415	0.0845415			Proteasome subunit alpha type-1 OS=Mus musculus GN=Psma1 PE=1 SV=1 - [PSA1_MOUSE]	Q9R1P4	0.312799	0.504735	2.03558	1.02544	0.0540012	0	0.0540012		Proteasome subunit alpha type-7 OS=Mus musculus GN=Psma7 PE=1 SV=1 - [PSA7_MOUSE]	Q9Z2U0	0.228892	0.640369	1.74078	0.799735	0.05728	0	0.05728
CD9 antigen OS=Mus musculus GN=Cd9 PE=1 SV=2 - [CD9_MOUSE]	P40240	0.00567636	2.24593	4.7456	2.24659	0	0.140603	0.140603		Moesin OS=Mus musculus GN=Msn PE=1 SV=3 - [MOES_MOUSE]	P26041	0.0350728	1.45503	4.16518	2.05838	0	0.195973	0.195973		Tubulin alpha-3 chain OS=Mus musculus GN=Tuba3a PE=1 SV=1 - [TBA3_MOUSE]	P05214	0.329751	0.481814	3.85227	1.94571	0	0.0868403	0.0868403			CD9 antigen OS=Mus musculus GN=Cd9 PE=1 SV=2 - [CD9_MOUSE]	P40240	0.114868	0.9398	1.90672	0.931095	0.140603	0	0.140603		Complement factor H OS=Mus musculus GN=Cfh PE=1 SV=2 - [CFAH_MOUSE]	P06909	0.271063	0.56693	1.72376	0.785555	0.103945	0.0311818	0.103945
Keratin, type II cytoskeletal 8 OS=Mus musculus GN=Krt8 PE=1 SV=4 - [K2C8_MOUSE]	P11679	0.0691512	1.1602	4.20959	2.07368	0	0.174022	0.174022		Ig kappa chain V-V region HP 124E1 OS=Mus musculus PE=1 SV=1 - [KV5AE_MOUSE]	P01647	0.448832	0.347916	4.13765	2.04881	0	0.44725	0.44725		Serine protease inhibitor A3N OS=Mus musculus GN=Serpina3n PE=1 SV=1 - [SPA3N_MOUSE]	Q91WP6	0.0425657	1.37094	3.79837	1.92538	0.142871	0.524722	0.524722			Fibronectin OS=Mus musculus GN=Fn1 PE=1 SV=4 - [FINC_MOUSE]	P11276	0.340394	0.468018	1.8846	0.914262	0.177704	0.0823393	0.177704		Keratin, type II cytoskeletal 8 OS=Mus musculus GN=Krt8 PE=1 SV=4 - [K2C8_MOUSE]	P11679	0.0588803	1.23003	1.68915	0.756296	0.174022	0.104029	0.174022
Ig kappa chain V-VI region NQ2-17,4,1 OS=Mus musculus PE=2 SV=1 - [KV6A6_MOUSE]	P04940	0.31808	0.497464	3.9501	1.98189	0	0.207018	0.207018		Ezrin OS=Mus musculus GN=Ezr PE=1 SV=3 - [EZRI_MOUSE]	P26040	0.0272088	1.56529	4.02107	2.00758	0	0.187874	0.187874		Complement C5 OS=Mus musculus GN=C5 PE=1 SV=2 - [CO5_MOUSE]	P06684	0.0283629	1.54725	3.74782	1.90605	0.0351829	0.13524	0.13524			Tubulin alpha-3 chain OS=Mus musculus GN=Tuba3a PE=1 SV=1 - [TBA3_MOUSE]	P05214	0.259783	0.585389	1.87412	0.906217	0.0479055	0	0.0479055		Transferrin receptor protein 1 OS=Mus musculus GN=Tfrc PE=1 SV=1 - [TFR1_MOUSE]	Q62351	0.38984	0.409114	1.5961	0.674547	0.310667	0.198635	0.310667
C-reactive protein OS=Mus musculus GN=Crp PE=1 SV=2 - [CRP_MOUSE]	P14847	0.0136151	1.86598	3.79171	1.92285	0	0.171491	0.171491		Ig kappa chain V-II region 2S1,3 OS=Mus musculus PE=1 SV=1 - [KV2A4_MOUSE]	P01629	0.443418	0.353187	3.57574	1.83824	0	0.278065	0.278065		Haptoglobin OS=Mus musculus GN=Hp PE=1 SV=1 - [HPT_MOUSE]	Q61646	0.053331	1.27302	3.74626	1.90545	0	0.12409	0.12409			H-2 class I histocompatibility antigen, Q10 alpha chain OS=Mus musculus GN=H2-Q10 PE=1 SV=3 - [HA10_MOUSE]	P01898	0.247017	0.607273	1.7916	0.841249	0.0428324	0	0.0428324		Mannose-binding protein C OS=Mus musculus GN=Mbl2 PE=1 SV=2 - [MBL2_MOUSE]	P41317	0.22126	0.655098	1.56385	0.6451	0.533363	0.337082	0.533363
Glia-derived nexin OS=Mus musculus GN=Serpine2 PE=1 SV=2 - [GDN_MOUSE]	Q07235	0.0824195	1.08397	3.77477	1.91639	0.0573652	0.303275	0.303275		Fermitin family homolog 3 OS=Mus musculus GN=Fermt3 PE=1 SV=1 - [URP2_MOUSE]	Q8K1B8	0.000775318	3.11052	3.31438	1.72874	0.0439302	0.145637	0.145637		Ig heavy chain V-III region A4 OS=Mus musculus PE=1 SV=1 - [HVM27_MOUSE]	P01796	0.55692	0.254207	3.67069	1.87605	0	0.435032	0.435032			Complement factor H OS=Mus musculus GN=Cfh PE=1 SV=2 - [CFAH_MOUSE]	P06909	0.217071	0.663398	1.7574	0.813446	0.103945	0.0564764	0.103945		Complement C5 OS=Mus musculus GN=C5 PE=1 SV=2 - [CO5_MOUSE]	P06684	0.0203887	1.69061	1.55416	0.636139	0.209544	0.13524	0.209544
Ig lambda-1 chain V region OS=Mus musculus PE=1 SV=2 - [LV1A_MOUSE]	P01723	0.396415	0.40185	3.77106	1.91497	0	0.195823	0.195823		Serum paraoxonase/arylesterase 1 OS=Mus musculus GN=Pon1 PE=1 SV=2 - [PON1_MOUSE]	P52430	0.212468	0.672706	3.17215	1.66546	0	0.0858878	0.0858878		Tubulin alpha-1C chain OS=Mus musculus GN=Tuba1c PE=1 SV=1 - [TBA1C_MOUSE]	P68373	0.319339	0.495748	3.63353	1.86137	0	0.154676	0.154676			Ig kappa chain V-III region ABPC 22/PC 9245 OS=Mus musculus PE=1 SV=1 - [KV3AA_MOUSE]	P01662	0.0200313	1.69829	1.7574	0.813445	0.589826	0.336281	0.589826		Ig lambda-1 chain C region OS=Mus musculus PE=1 SV=1 - [LAC1_MOUSE]	P01843	0.0606066	1.21748	1.53225	0.615653	1.31169	0.851204	1.31169
H-2 class I histocompatibility antigen, Q10 alpha chain OS=Mus musculus GN=H2-Q10 PE=1 SV=3 - [HA10_MOUSE]	P01898	0.141797	0.848333	3.62289	1.85714	0	0.0428324	0.0428324		Apolipoprotein B-100 OS=Mus musculus GN=Apob PE=1 SV=1 - [APOB_MOUSE]	E9Q414	0.0501372	1.29984	3.03423	1.60133	0.0196242	0.0594749	0.0594749		Fermitin family homolog 3 OS=Mus musculus GN=Fermt3 PE=1 SV=1 - [URP2_MOUSE]	Q8K1B8	0.0338938	1.46988	3.33138	1.73612	0.0439302	0.150101	0.150101			Ig kappa chain V region Mem5 (Fragment) OS=Mus musculus PE=1 SV=1 - [KVM5_MOUSE]	P84750	0.568537	0.245241	1.69033	0.757303	0.12041	0	0.12041		Keratin, type I cytoskeletal 10 OS=Mus musculus GN=Krt10 PE=1 SV=3 - [K1C10_MOUSE]	P02535	0.00422396	2.37428	1.52806	0.6117	0.102897	0.0450582	0.102897
Proteasome subunit beta type-10 OS=Mus musculus GN=Psmb10 PE=1 SV=1 - [PSB10_MOUSE]	O35955	0.136986	0.863325	3.56537	1.83405	0	0.0823484	0.0823484		C-reactive protein OS=Mus musculus GN=Crp PE=1 SV=2 - [CRP_MOUSE]	P14847	0.280807	0.551592	2.98877	1.57955	0	0.140684	0.140684		Proteasome subunit beta type-4 OS=Mus musculus GN=Psmb4 PE=1 SV=1 - [PSB4_MOUSE]	P99026	0.17437	0.758529	3.09416	1.62955	0	0.0894046	0.0894046			Keratin, type I cytoskeletal 42 OS=Mus musculus GN=Krt42 PE=1 SV=1 - [K1C42_MOUSE]	Q6IFX2	0.581557	0.235408	1.65723	0.728774	0.0636518	0	0.0636518		Proteasome subunit beta type-9 OS=Mus musculus bactrianus GN=Psmb9 PE=1 SV=1 - [PSB9_MUSMB]	O35522	0.605224	0.218084	1.50956	0.594126	0.102163	0	0.102163
Proteasome subunit alpha type-5 OS=Mus musculus GN=Psma5 PE=1 SV=1 - [PSA5_MOUSE]	Q9Z2U1	0.00777088	2.10953	3.45276	1.78775	0	0.134459	0.134459		Erythrocyte band 7 integral membrane protein OS=Mus musculus GN=Stom PE=1 SV=3 - [STOM_MOUSE]	P54116	0.138628	0.858149	2.94701	1.55925	0	0.0852833	0.0852833		Integrin alpha-IIb OS=Mus musculus GN=Itga2b PE=1 SV=2 - [ITA2B_MOUSE]	Q9QUM0	0.102187	0.990606	2.82745	1.4995	0	0.0776524	0.0776524			Keratin, type I cytoskeletal 17 OS=Mus musculus GN=Krt17 PE=1 SV=3 - [K1C17_MOUSE]	Q9QWL7	0.707952	0.149996	1.64866	0.72129	0.0662568	0	0.0662568		Complement C4-B OS=Mus musculus GN=C4b PE=1 SV=3 - [CO4B_MOUSE]	P01029	0.114817	0.939994	1.50488	0.589648	0.651086	0.433966	0.651086
Tubulin alpha-3 chain OS=Mus musculus GN=Tuba3a PE=1 SV=1 - [TBA3_MOUSE]	P05214	0.34388	0.463593	3.15784	1.65894	0	0.0479055	0.0479055		Complement C5 OS=Mus musculus GN=C5 PE=1 SV=2 - [CO5_MOUSE]	P06684	0.0212329	1.67299	2.773	1.47145	0.0351829	0.0986469	0.0986469		Coagulation factor XIII A chain OS=Mus musculus GN=F13a1 PE=1 SV=3 - [F13A_MOUSE]	Q8BH61	0.00647068	2.18905	2.80679	1.48892	0.0203185	0.115584	0.115584			Keratin, type II cytoskeletal 8 OS=Mus musculus GN=Krt8 PE=1 SV=4 - [K2C8_MOUSE]	P11679	0.0625778	1.20358	1.6439	0.717123	0.174022	0.106901	0.174022		Plasma protease C1 inhibitor OS=Mus musculus GN=Serping1 PE=1 SV=3 - [IC1_MOUSE]	P97290	0.21062	0.6765	1.45505	0.54107	0.951847	0.656647	0.951847
Apolipoprotein B-100 OS=Mus musculus GN=Apob PE=1 SV=1 - [APOB_MOUSE]	E9Q414	0.107239	0.969647	3.15467	1.65749	0.0196242	0.0649615	0.0649615		Talin-1 OS=Mus musculus GN=Tln1 PE=1 SV=2 - [TLN1_MOUSE]	P26039	0.00192004	2.71669	2.69488	1.43022	0.0522807	0.140784	0.140784		Phosphatidylinositol-glycan-specific phospholipase D OS=Mus musculus GN=Gpld1 PE=1 SV=1 - [PHLD_MOUSE]	O70362	0.0233099	1.63246	2.79715	1.48396	0	0.0473033	0.0473033			Proteasome subunit beta type-4 OS=Mus musculus GN=Psmb4 PE=1 SV=1 - [PSB4_MOUSE]	P99026	0.598664	0.222817	1.64155	0.715058	0.0548001	0	0.0548001		Proteasome subunit alpha type-5 OS=Mus musculus GN=Psma5 PE=1 SV=1 - [PSA5_MOUSE]	Q9Z2U1	0.588134	0.230524	1.44999	0.536043	0.134459	0.0835125	0.134459
Proteasome subunit beta type-9 OS=Mus musculus bactrianus GN=Psmb9 PE=1 SV=1 - [PSB9_MUSMB]	O35522	0.229538	0.639146	3.12025	1.64166	0	0.102163	0.102163		Serine protease inhibitor A3N OS=Mus musculus GN=Serpina3n PE=1 SV=1 - [SPA3N_MOUSE]	Q91WP6	0.0733415	1.13465	2.6515	1.40681	0.142871	0.365796	0.365796		Inter-alpha-trypsin inhibitor heavy chain H1 OS=Mus musculus GN=Itih1 PE=1 SV=2 - [ITIH1_MOUSE]	Q61702	0.111181	0.953971	2.76224	1.46584	0.0992063	0.257392	0.257392			Integrin alpha-IIb OS=Mus musculus GN=Itga2b PE=1 SV=2 - [ITA2B_MOUSE]	Q9QUM0	0.356713	0.447681	1.60428	0.681928	0.0717102	0.0438526	0.0717102		Ig kappa chain V-II region MOPC 511 OS=Mus musculus PE=1 SV=1 - [KV2A3_MOUSE]	P01628	0.591386	0.228129	1.42759	0.513583	0.553951	0.403628	0.553951
Moesin OS=Mus musculus GN=Msn PE=1 SV=3 - [MOES_MOUSE]	P26041	0.0533642	1.27275	3.09322	1.62911	0	0.145435	0.145435		Transthyretin OS=Mus musculus GN=Ttr PE=1 SV=1 - [TTHY_MOUSE]	P07309	0.0298552	1.52498	2.61442	1.38649	0.369505	0.954904	0.954904		Isocitrate dehydrogenase [NADP] cytoplasmic OS=Mus musculus GN=Idh1 PE=1 SV=2 - [IDHC_MOUSE]	O88844	0.052942	1.2762	2.63368	1.39708	0.0711884	0.192503	0.192503			Ig kappa chain V-V region HP R16,7 OS=Mus musculus PE=1 SV=1 - [KV5AB_MOUSE]	P01644	0.226052	0.645791	1.59758	0.675892	2.28805	1.45503	2.28805		Proteasome subunit beta type-1 OS=Mus musculus GN=Psmb1 PE=1 SV=1 - [PSB1_MOUSE]	O09061	0.591386	0.228129	1.42759	0.513583	0.22541	0.14944	0.22541
Hemopexin OS=Mus musculus GN=Hpx PE=1 SV=2 - [HEMO_MOUSE]	Q91X72	0.147228	0.83201	3.02872	1.59871	0	0.115838	0.115838		Alpha-enolase OS=Mus musculus GN=Eno1 PE=1 SV=3 - [ENOA_MOUSE]	P17182	0.0999908	1.00004	2.56314	1.35791	0	0.109926	0.109926		Tubulin beta-1 chain OS=Mus musculus GN=Tubb1 PE=1 SV=1 - [TBB1_MOUSE]	A2AQ07	0.048845	1.31118	2.63368	1.39708	0.0826315	0.212533	0.212533			Keratin, type II cytoskeletal 2 epidermal OS=Mus musculus GN=Krt2 PE=1 SV=1 - [K22E_MOUSE]	Q3TTY5	0.625082	0.204063	1.5586	0.640252	0.0224964	0	0.0224964		Proteasome subunit beta type-10 OS=Mus musculus GN=Psmb10 PE=1 SV=1 - [PSB10_MOUSE]	O35955	0.605685	0.217753	1.42182	0.507736	0.0823484	0	0.0823484
Ig heavy chain Mem5 (Fragment) OS=Mus musculus PE=1 SV=1 - [HVM63_MOUSE]	P84751	0.602227	0.22024	2.9851	1.57778	0	0.30859	0.30859		Keratin, type II cytoskeletal 8 OS=Mus musculus GN=Krt8 PE=1 SV=4 - [K2C8_MOUSE]	P11679	0.156352	0.805897	2.56074	1.35656	0	0.106901	0.106901		Talin-1 OS=Mus musculus GN=Tln1 PE=1 SV=2 - [TLN1_MOUSE]	P26039	0.00223877	2.64999	2.54439	1.34732	0.0522807	0.132926	0.132926			Mannan-binding lectin serine protease 1 OS=Mus musculus GN=Masp1 PE=1 SV=2 - [MASP1_MOUSE]	P98064	0.343136	0.464534	1.54988	0.63216	0.165405	0.109417	0.165405		Erythrocyte band 7 integral membrane protein OS=Mus musculus GN=Stom PE=1 SV=3 - [STOM_MOUSE]	P54116	0.699269	0.155356	1.40506	0.490633	0.0762804	0	0.0762804
Proteasome subunit beta type-1 OS=Mus musculus GN=Psmb1 PE=1 SV=1 - [PSB1_MOUSE]	O09061	0.247887	0.605746	2.81657	1.49394	0.0641076	0.22541	0.22541		Isocitrate dehydrogenase [NADP] cytoplasmic OS=Mus musculus GN=Idh1 PE=1 SV=2 - [IDHC_MOUSE]	O88844	0.018166	1.74074	2.42047	1.27529	0.0711884	0.173515	0.173515		Proteasome subunit beta type-3 OS=Mus musculus GN=Psmb3 PE=1 SV=1 - [PSB3_MOUSE]	Q9R1P1	0.197205	0.705081	2.52862	1.33835	0	0.07557	0.07557			Proteasome subunit alpha type-7 OS=Mus musculus GN=Psma7 PE=1 SV=1 - [PSA7_MOUSE]	Q9Z2U0	0.012426	1.90567	1.53558	0.618788	0.05728	0	0.05728		Hypoxia up-regulated protein 1 OS=Mus musculus GN=Hyou1 PE=1 SV=1 - [HYOU1_MOUSE]	Q9JKR6	0.4234	0.373249	1.36159	0.445292	0	0.0156085	0
Proteasome subunit beta type-3 OS=Mus musculus GN=Psmb3 PE=1 SV=1 - [PSB3_MOUSE]	Q9R1P1	0.426639	0.369939	2.72003	1.44362	0	0.138961	0.138961		Peptidyl-prolyl cis-trans isomerase A OS=Mus musculus GN=Ppia PE=1 SV=2 - [PPIA_MOUSE]	P17742	0.427728	0.368832	2.40171	1.26406	0	0.099262	0.099262		Keratin, type II cytoskeletal 8 OS=Mus musculus GN=Krt8 PE=1 SV=4 - [K2C8_MOUSE]	P11679	0.16347	0.786561	2.49215	1.31739	0	0.104029	0.104029			Ig kappa chain V-II region 7S34,1 OS=Mus musculus PE=1 SV=1 - [KV2A6_MOUSE]	P01630	0.18568	0.731236	1.52196	0.605927	0.504526	0.324046	0.504526		Keratin, type I cytoskeletal 17 OS=Mus musculus GN=Krt17 PE=1 SV=3 - [K1C17_MOUSE]	Q9QWL7	0.771202	0.112832	1.35318	0.436356	0.0662568	0	0.0662568
Integrin alpha-IIb OS=Mus musculus GN=Itga2b PE=1 SV=2 - [ITA2B_MOUSE]	Q9QUM0	0.154651	0.810648	2.55285	1.35211	0	0.0717102	0.0717102		Mannose-binding protein A OS=Mus musculus GN=Mbl1 PE=1 SV=1 - [MBL1_MOUSE]	P39039	0.00206986	2.68406	2.33841	1.22553	0.620884	1.45119	1.45119		Heat shock-related 70 kDa protein 2 OS=Mus musculus GN=Hspa2 PE=1 SV=2 - [HSP72_MOUSE]	P17156	0.0320361	1.49436	2.4778	1.30906	0	0.0848838	0.0848838			Mannose-binding protein C OS=Mus musculus GN=Mbl2 PE=1 SV=2 - [MBL2_MOUSE]	P41317	0.47212	0.325948	1.52196	0.605927	0.533363	0.355636	0.533363		Mannan-binding lectin serine protease 1 OS=Mus musculus GN=Masp1 PE=1 SV=2 - [MASP1_MOUSE]	P98064	0.17499	0.756988	1.35132	0.434368	0.165405	0.123208	0.165405
Ig kappa chain V region Mem5 (Fragment) OS=Mus musculus PE=1 SV=1 - [KVM5_MOUSE]	P84750	0.422704	0.373964	2.47135	1.3053	0	0.12041	0.12041		Tetranectin OS=Mus musculus GN=Clec3b PE=1 SV=2 - [TETN_MOUSE]	P43025	0.394638	0.403801	2.32677	1.21833	0	0.101785	0.101785		Apolipoprotein B-100 OS=Mus musculus GN=Apob PE=1 SV=1 - [APOB_MOUSE]	E9Q414	0.0800995	1.09637	2.46258	1.30017	0.0196242	0.0484383	0.0484383			Keratin, type I cytoskeletal 14 OS=Mus musculus GN=Krt14 PE=1 SV=2 - [K1C14_MOUSE]	Q61781	0.747267	0.126524	1.48173	0.567278	0.0754505	0	0.0754505		Ig gamma-1 chain C region secreted form OS=Mus musculus GN=Ighg1 PE=1 SV=1 - [IGHG1_MOUSE]	P01868	0.0765508	1.11605	1.29608	0.374153	0.823075	0.637975	0.823075
Keratin, type II cytoskeletal 5 OS=Mus musculus GN=Krt5 PE=1 SV=1 - [K2C5_MOUSE]	Q922U2	0.150989	0.821056	2.4296	1.28072	0	0.103326	0.103326		Inter-alpha-trypsin inhibitor heavy chain H1 OS=Mus musculus GN=Itih1 PE=1 SV=2 - [ITIH1_MOUSE]	Q61702	0.151399	0.819876	2.31415	1.21048	0.0992063	0.215594	0.215594		Inter alpha-trypsin inhibitor, heavy chain 4 OS=Mus musculus GN=Itih4 PE=1 SV=2 - [ITIH4_MOUSE]	A6X935	0.028033	1.55233	2.4261	1.27864	0.189922	0.455663	0.455663			Keratin, type I cytoskeletal 10 OS=Mus musculus GN=Krt10 PE=1 SV=3 - [K1C10_MOUSE]	P02535	0.0496375	1.30419	1.44821	0.534272	0.102897	0.0463167	0.102897		Ig kappa chain V-V region K2 (Fragment) OS=Mus musculus PE=1 SV=1 - [KV5A3_MOUSE]	P01635	0.315203	0.50141	1.28865	0.365855	1.47472	1.14664	1.47472
Keratin, type I cytoskeletal 42 OS=Mus musculus GN=Krt42 PE=1 SV=1 - [K1C42_MOUSE]	Q6IFX2	0.32906	0.482725	2.40761	1.2676	0	0.0636518	0.0636518		Proteoglycan 4 OS=Mus musculus GN=Prg4 PE=1 SV=2 - [PRG4_MOUSE]	Q9JM99	0.102961	0.987327	2.23919	1.16298	0	0.0795822	0.0795822		Ig kappa chain V region Mem5 (Fragment) OS=Mus musculus PE=1 SV=1 - [KVM5_MOUSE]	P84750	0.468976	0.328849	2.42573	1.27842	0	0.130964	0.130964			CD5 antigen-like OS=Mus musculus GN=Cd5l PE=1 SV=3 - [CD5L_MOUSE]	Q9QWK4	0.595229	0.225316	1.36936	0.453499	0.674087	0.479449	0.674087		Apolipoprotein B-100 OS=Mus musculus GN=Apob PE=1 SV=1 - [APOB_MOUSE]	E9Q414	0.37821	0.422267	1.28104	0.357318	0.0649615	0.0484383	0.0649615
Keratin, type I cytoskeletal 10 OS=Mus musculus GN=Krt10 PE=1 SV=3 - [K1C10_MOUSE]	P02535	0.18672	0.728808	2.36279	1.24049	0	0.102897	0.102897		Ig kappa chain V-V region MOPC 41 OS=Mus musculus GN=Gm5571 PE=1 SV=1 - [KV5A7_MOUSE]	P01639	0.0299178	1.52407	2.20959	1.14378	0.637451	1.41475	1.41475		Proteasome subunit alpha type-5 OS=Mus musculus GN=Psma5 PE=1 SV=1 - [PSA5_MOUSE]	Q9Z2U1	0.282185	0.549466	2.38123	1.25171	0	0.0835125	0.0835125			Hemoglobin subunit alpha OS=Mus musculus GN=Hba PE=1 SV=2 - [HBA_MOUSE]	P01942	0.417968	0.378857	1.36128	0.444963	0.706222	0.520893	0.706222		Ig heavy chain V region RF OS=Mus musculus PE=1 SV=1 - [HVM53_MOUSE]	P18524	0.105169	0.978112	1.27688	0.352619	0.476034	0.37376	0.476034
Inter alpha-trypsin inhibitor, heavy chain 4 OS=Mus musculus GN=Itih4 PE=1 SV=2 - [ITIH4_MOUSE]	A6X935	0.0310399	1.50808	2.32989	1.22026	0.189922	0.437658	0.437658		Inter alpha-trypsin inhibitor, heavy chain 4 OS=Mus musculus GN=Itih4 PE=1 SV=2 - [ITIH4_MOUSE]	A6X935	0.101479	0.993622	2.1382	1.0964	0.189922	0.410848	0.410848		Ig kappa chain V-II region 2S1,3 OS=Mus musculus PE=1 SV=1 - [KV2A4_MOUSE]	P01629	0.517656	0.285959	2.34728	1.23099	0	0.142003	0.142003			Complement C4-B OS=Mus musculus GN=C4b PE=1 SV=3 - [CO4B_MOUSE]	P01029	0.0152244	1.81746	1.32429	0.405217	0.651086	0.491649	0.651086		Ig kappa chain V-II region 7S34,1 OS=Mus musculus PE=1 SV=1 - [KV2A6_MOUSE]	P01630	0.592707	0.22716	1.27688	0.352619	0.504526	0.384818	0.504526
Serine protease inhibitor A3N OS=Mus musculus GN=Serpina3n PE=1 SV=1 - [SPA3N_MOUSE]	Q91WP6	0.167354	0.776365	2.2973	1.19994	0.142871	0.328839	0.328839		Kininogen-1 OS=Mus musculus GN=Kng1 PE=1 SV=1 - [KNG1_MOUSE]	O08677	0.0457646	1.33947	2.12772	1.08931	0.215294	0.455339	0.455339		Ig kappa chain V-V region MOPC 149 OS=Mus musculus PE=1 SV=1 - [KV5A4_MOUSE]	P01636	0.149731	0.824687	2.3227	1.2158	0.625072	1.36293	1.36293			Carboxypeptidase N subunit 2 OS=Mus musculus GN=Cpn2 PE=1 SV=2 - [CPN2_MOUSE]	Q9DBB9	0.179518	0.745893	1.305	0.384048	0.0395727	0	0.0395727		Alpha-enolase OS=Mus musculus GN=Eno1 PE=1 SV=3 - [ENOA_MOUSE]	P17182	0.64239	0.192201	1.22664	0.294708	0.0960736	0.0701822	0.0960736
Alpha-enolase OS=Mus musculus GN=Eno1 PE=1 SV=3 - [ENOA_MOUSE]	P17182	0.116618	0.933236	2.25224	1.17136	0	0.0960736	0.0960736		Keratin, type I cytoskeletal 15 OS=Mus musculus GN=Krt15 PE=1 SV=2 - [K1C15_MOUSE]	Q61414	0.187917	0.726035	2.06481	1.04601	0	0.0363029	0.0363029		Hemoglobin subunit beta-1 OS=Mus musculus GN=Hbb-b1 PE=1 SV=2 - [HBB1_MOUSE]	P02088	0.0100997	1.99569	2.30804	1.20667	0.524402	1.21431	1.21431			C-reactive protein OS=Mus musculus GN=Crp PE=1 SV=2 - [CRP_MOUSE]	P14847	0.772469	0.112119	1.26866	0.343301	0.171491	0.140684	0.171491		Keratin, type II cytoskeletal 79 OS=Mus musculus GN=Krt79 PE=1 SV=2 - [K2C79_MOUSE]	Q8VED5	0.895435	0.0479661	1.2255	0.293373	0.0693075	0	0.0693075
Catalase OS=Mus musculus GN=Cat PE=1 SV=4 - [CATA_MOUSE]	P24270	0.121989	0.913681	2.23575	1.16076	0	0.0327055	0.0327055		Coagulation factor XIII A chain OS=Mus musculus GN=F13a1 PE=1 SV=3 - [F13A_MOUSE]	Q8BH61	0.00135528	2.86797	2.03934	1.0281	0.0203185	0.0837174	0.0837174		Mannose-binding protein A OS=Mus musculus GN=Mbl1 PE=1 SV=1 - [MBL1_MOUSE]	P39039	0.014066	1.85183	2.30604	1.20542	0.620884	1.43721	1.43721			Complement C3 OS=Mus musculus GN=C3 PE=1 SV=3 - [CO3_MOUSE]	P01027	0.132572	0.877549	1.25117	0.323279	0.52879	0.421751	0.52879		Ig heavy chain V region 3 OS=Mus musculus GN=Ighv1-61 PE=1 SV=1 - [HVM05_MOUSE]	P01749	0.0620583	1.2072	1.20385	0.267656	0.545683	0.45419	0.545683
Tubulin alpha-1C chain OS=Mus musculus GN=Tuba1c PE=1 SV=1 - [TBA1C_MOUSE]	P68373	0.418481	0.378324	2.22658	1.15483	0	0.0783682	0.0783682		Serine protease inhibitor A3K OS=Mus musculus GN=Serpina3k PE=1 SV=2 - [SPA3K_MOUSE]	P07759	0.00113881	2.94355	2.03542	1.02533	0.513539	1.04527	1.04527		Proteasome subunit beta type-2 OS=Mus musculus GN=Psmb2 PE=1 SV=1 - [PSB2_MOUSE]	Q9R1P3	0.292208	0.534308	2.24942	1.16955	0	0.09629	0.09629			Keratin, type II cytoskeletal 1 OS=Mus musculus GN=Krt1 PE=1 SV=4 - [K2C1_MOUSE]	P04104	0.119149	0.923908	1.24267	0.313445	0.0933525	0.075316	0.0933525		Serum albumin OS=Mus musculus GN=Alb PE=1 SV=3 - [ALBU_MOUSE]	P07724	0.0410393	1.3868	1.19316	0.254782	1.48726	1.24746	1.48726
Haptoglobin OS=Mus musculus GN=Hp PE=1 SV=1 - [HPT_MOUSE]	Q61646	0.156984	0.804145	2.13951	1.09728	0	0.0411733	0.0411733		Ig kappa chain V-V region MOPC 149 OS=Mus musculus PE=1 SV=1 - [KV5A4_MOUSE]	P01636	0.212991	0.671638	1.99679	0.997686	0.625072	1.17805	1.17805		Serine protease inhibitor A3K OS=Mus musculus GN=Serpina3k PE=1 SV=2 - [SPA3K_MOUSE]	P07759	0.0783213	1.10612	2.18089	1.12492	0.513539	1.14995	1.14995			Plasma protease C1 inhibitor OS=Mus musculus GN=Serping1 PE=1 SV=3 - [IC1_MOUSE]	P97290	0.226063	0.645771	1.23991	0.310232	0.951847	0.767974	0.951847		Pregnancy zone protein OS=Mus musculus GN=Pzp PE=1 SV=3 - [PZP_MOUSE]	Q61838	0.44445	0.352177	1.19099	0.252162	0.890307	0.73008	0.890307
Erythrocyte band 7 integral membrane protein OS=Mus musculus GN=Stom PE=1 SV=3 - [STOM_MOUSE]	P54116	0.373248	0.428003	2.1269	1.08875	0	0.0762804	0.0762804		Haptoglobin OS=Mus musculus GN=Hp PE=1 SV=1 - [HPT_MOUSE]	Q61646	0.290273	0.537193	1.95359	0.966126	0	0.0460327	0.0460327		Hemoglobin subunit alpha OS=Mus musculus GN=Hba PE=1 SV=2 - [HBA_MOUSE]	P01942	0.0687227	1.1629	2.15039	1.1046	0.330386	0.726229	0.726229			Ceruloplasmin OS=Mus musculus GN=Cp PE=1 SV=2 - [CERU_MOUSE]	Q61147	0.63049	0.200322	1.23681	0.306628	0.0652092	0.0368107	0.0652092		C-type lectin domain family 4 member F OS=Mus musculus GN=Clec4f PE=1 SV=1 - [CLC4F_MOUSE]	P70194	0.425837	0.370757	1.18396	0.243615	0.0579602	0	0.0579602
Hemoglobin subunit alpha OS=Mus musculus GN=Hba PE=1 SV=2 - [HBA_MOUSE]	P01942	0.0182163	1.73954	2.12688	1.08874	0.330386	0.706222	0.706222		Hypoxia up-regulated protein 1 OS=Mus musculus GN=Hyou1 PE=1 SV=1 - [HYOU1_MOUSE]	Q9JKR6	0.0323713	1.48984	1.94831	0.962221	0	0.020376	0.020376		Matrix metalloproteinase-19 OS=Mus musculus GN=Mmp19 PE=2 SV=1 - [MMP19_MOUSE]	Q9JHI0	0.0297536	1.52646	2.10449	1.07347	0	0.0373066	0.0373066			Actin, cytoplasmic 1 OS=Mus musculus GN=Actb PE=1 SV=1 - [ACTB_MOUSE]	P60710	0.520137	0.283882	1.22993	0.298572	0.416806	0.339576	0.416806		Ig lambda-2 chain C region OS=Mus musculus GN=Iglc2 PE=1 SV=1 - [LAC2_MOUSE]	P01844	0.236821	0.62558	1.1837	0.243299	1.64854	1.40068	1.64854
Mannose-binding protein C OS=Mus musculus GN=Mbl2 PE=1 SV=2 - [MBL2_MOUSE]	P41317	0.116615	0.933244	2.12688	1.08874	0.254879	0.533363	0.533363		Myosin-9 OS=Mus musculus GN=Myh9 PE=1 SV=4 - [MYH9_MOUSE]	Q8VDD5	0.0526223	1.27883	1.91902	0.940368	0.0439034	0.0833708	0.0833708		Ectonucleotide pyrophosphatase/phosphodiesterase family member 2 OS=Mus musculus GN=Enpp2 PE=1 SV=3 - [ENPP2_MOUSE]	Q9R1E6	0.381653	0.418331	2.09581	1.06751	0	0.0175497	0.0175497			Mannan-binding lectin serine protease 2 OS=Mus musculus GN=Masp2 PE=1 SV=1 - [MASP2_MOUSE]	Q91WP0	0.633944	0.197949	1.22804	0.296353	0.117565	0.059056	0.117565		Ig heavy chain V region M511 OS=Mus musculus PE=1 SV=1 - [HVM21_MOUSE]	P01790	0.0585167	1.23272	1.16562	0.221102	1.15734	0.99313	1.15734
Ig kappa chain V-V region MOPC 41 OS=Mus musculus GN=Gm5571 PE=1 SV=1 - [KV5A7_MOUSE]	P01639	0.021357	1.67046	2.10013	1.07048	0.637451	1.33962	1.33962		Heat shock cognate 71 kDa protein OS=Mus musculus GN=Hspa8 PE=1 SV=1 - [HSP7C_MOUSE]	P63017	0.134382	0.871659	1.91356	0.936257	0.0822509	0.158822	0.158822		Complement component C8 alpha chain OS=Mus musculus GN=C8a PE=1 SV=1 - [CO8A_MOUSE]	Q8K182	0.0547545	1.26158	2.04004	1.0286	0.0877728	0.178923	0.178923			Filamin-A OS=Mus musculus GN=Flna PE=1 SV=5 - [FLNA_MOUSE]	Q8BTM8	0.163701	0.785949	1.22704	0.295182	0.0681715	0.0558831	0.0681715		Ig kappa chain V-VI region XRPC 44 OS=Mus musculus PE=1 SV=1 - [KV6A1_MOUSE]	P01675	0.634901	0.197294	1.16562	0.221101	0.626333	0.508429	0.626333
Keratin, type I cytoskeletal 14 OS=Mus musculus GN=Krt14 PE=1 SV=2 - [K1C14_MOUSE]	Q61781	0.227061	0.643858	2.09542	1.06724	0	0.0754505	0.0754505		Matrix metalloproteinase-19 OS=Mus musculus GN=Mmp19 PE=2 SV=1 - [MMP19_MOUSE]	Q9JHI0	0.070961	1.14898	1.86162	0.89656	0	0.0684907	0.0684907		Transthyretin OS=Mus musculus GN=Ttr PE=1 SV=1 - [TTHY_MOUSE]	P07309	0.0535476	1.27126	2.01151	1.00828	0.369505	0.734533	0.734533			Ig alpha chain C region OS=Mus musculus PE=1 SV=1 - [IGHA_MOUSE]	P01878	0.469798	0.328089	1.21494	0.280883	1.82763	1.46938	1.82763		H-2 class I histocompatibility antigen, Q10 alpha chain OS=Mus musculus GN=H2-Q10 PE=1 SV=3 - [HA10_MOUSE]	P01898	0.800061	0.0968767	1.14761	0.198638	0.0428324	0	0.0428324
Mannose-binding protein A OS=Mus musculus GN=Mbl1 PE=1 SV=1 - [MBL1_MOUSE]	P39039	0.0125722	1.90059	2.07303	1.05174	0.620884	1.28991	1.28991		Hemoglobin subunit beta-1 OS=Mus musculus GN=Hbb-b1 PE=1 SV=2 - [HBB1_MOUSE]	P02088	0.00864868	2.06305	1.81132	0.857043	0.524402	0.951033	0.951033		Ig kappa chain V-III region PC 2880/PC 1229 OS=Mus musculus PE=1 SV=1 - [KV3A1_MOUSE]	P01654	0.00830329	2.08075	1.99883	0.999155	0.693351	1.38825	1.38825			Hypoxia up-regulated protein 1 OS=Mus musculus GN=Hyou1 PE=1 SV=1 - [HYOU1_MOUSE]	Q9JKR6	0.00620212	2.20746	1.20294	0.266569	0	0.020376	0		CD5 antigen-like OS=Mus musculus GN=Cd5l PE=1 SV=3 - [CD5L_MOUSE]	Q9QWK4	0.837808	0.0768555	1.13984	0.188831	0.674087	0.584267	0.674087
Coagulation factor XIII A chain OS=Mus musculus GN=F13a1 PE=1 SV=3 - [F13A_MOUSE]	Q8BH61	0.0191969	1.71677	2.06918	1.04906	0.0203185	0.0853576	0.0853576		Glucose-6-phosphate isomerase OS=Mus musculus GN=Gpi PE=1 SV=4 - [G6PI_MOUSE]	P06745	0.0474176	1.32406	1.75602	0.812308	0	0.0645135	0.0645135		Myosin-9 OS=Mus musculus GN=Myh9 PE=1 SV=4 - [MYH9_MOUSE]	Q8VDD5	0.124512	0.90479	1.9809	0.986157	0.0439034	0.0880852	0.0880852			Phosphatidylinositol-glycan-specific phospholipase D OS=Mus musculus GN=Gpld1 PE=1 SV=1 - [PHLD_MOUSE]	O70362	0.555706	0.255155	1.18543	0.245413	0.0380803	0	0.0380803		Ig alpha chain C region OS=Mus musculus PE=1 SV=1 - [IGHA_MOUSE]	P01878	0.368786	0.433226	1.13961	0.188539	1.82763	1.57957	1.82763
Transthyretin OS=Mus musculus GN=Ttr PE=1 SV=1 - [TTHY_MOUSE]	P07309	0.0520379	1.28368	1.98951	0.992416	0.369505	0.725873	0.725873		Complement component C8 alpha chain OS=Mus musculus GN=C8a PE=1 SV=1 - [CO8A_MOUSE]	Q8K182	0.26065	0.583942	1.71154	0.775294	0.0877728	0.156843	0.156843		Proteasome subunit beta type-1 OS=Mus musculus GN=Psmb1 PE=1 SV=1 - [PSB1_MOUSE]	O09061	0.339916	0.468628	1.97296	0.980361	0.0641076	0.14944	0.14944			Ig heavy chain V region AC38 205,12 OS=Mus musculus PE=1 SV=1 - [HVM51_MOUSE]	P06330	0.329848	0.481686	1.1789	0.237444	2.24419	1.91012	2.24419		Murinoglobulin-2 OS=Mus musculus GN=Mug2 PE=1 SV=2 - [MUG2_MOUSE]	P28666	0.299546	0.523536	1.13453	0.1821	0.195084	0.169442	0.195084
Heat shock-related 70 kDa protein 2 OS=Mus musculus GN=Hspa2 PE=1 SV=2 - [HSP72_MOUSE]	P17156	0.54916	0.260301	1.95364	0.966163	0	0.0842432	0.0842432		Ig heavy chain V region 3 OS=Mus musculus GN=Ighv1-61 PE=1 SV=1 - [HVM05_MOUSE]	P01749	0.136282	0.865563	1.71154	0.775293	0.320229	0.535198	0.535198		Alpha-2-HS-glycoprotein OS=Mus musculus GN=Ahsg PE=1 SV=1 - [FETUA_MOUSE]	P29699	0.450403	0.346399	1.94909	0.962801	0.0655856	0.164678	0.164678			Ig lambda-1 chain C region OS=Mus musculus PE=1 SV=1 - [LAC1_MOUSE]	P01843	0.657834	0.181884	1.1789	0.237444	1.31169	1.10576	1.31169		Keratin, type I cytoskeletal 42 OS=Mus musculus GN=Krt42 PE=1 SV=1 - [K1C42_MOUSE]	Q6IFX2	0.839991	0.0757252	1.12319	0.167601	0.0636518	0	0.0636518
Proteasome subunit beta type-2 OS=Mus musculus GN=Psmb2 PE=1 SV=1 - [PSB2_MOUSE]	Q9R1P3	0.606556	0.217129	1.92695	0.946321	0	0.139311	0.139311		Coagulation factor V OS=Mus musculus GN=F5 PE=1 SV=1 - [FA5_MOUSE]	O88783	0.0447466	1.34924	1.67368	0.743024	0.104096	0.175294	0.175294		6-phosphogluconate dehydrogenase, decarboxylating OS=Mus musculus GN=Pgd PE=1 SV=3 - [6PGD_MOUSE]	Q9DCD0	0.255342	0.592878	1.88873	0.917417	0	0.041423	0.041423			Ig gamma-2B chain C region OS=Mus musculus GN=Igh-3 PE=1 SV=3 - [IGG2B_MOUSE]	P01867	0.470649	0.327303	1.16671	0.222447	0.615729	0.532624	0.615729		Ig kappa chain V-V region MOPC 41 OS=Mus musculus GN=Gm5571 PE=1 SV=1 - [KV5A7_MOUSE]	P01639	0.844003	0.0736562	1.11296	0.154408	1.33962	1.27208	1.33962
Talin-1 OS=Mus musculus GN=Tln1 PE=1 SV=2 - [TLN1_MOUSE]	P26039	0.0416994	1.37987	1.89241	0.920221	0.0522807	0.0996634	0.0996634		Keratin, type I cytoskeletal 13 OS=Mus musculus GN=Krt13 PE=1 SV=2 - [K1C13_MOUSE]	P08730	0.561016	0.251025	1.64246	0.715862	0	0.0474396	0.0474396		Ig kappa chain V-V region MOPC 41 OS=Mus musculus GN=Gm5571 PE=1 SV=1 - [KV5A7_MOUSE]	P01639	0.214389	0.668797	1.88697	0.916068	0.637451	1.27208	1.27208			Heparin cofactor 2 OS=Mus musculus GN=Serpind1 PE=1 SV=1 - [HEP2_MOUSE]	P49182	0.894635	0.0483539	1.16323	0.218142	0.0538285	0.0327335	0.0538285		Ig heavy chain V region VH558 A1/A4 OS=Mus musculus GN=Gm5629 PE=2 SV=1 - [HVM52_MOUSE]	P06327	0.86642	0.0622714	1.10581	0.1451	0.486066	0.437634	0.486066
C-type lectin domain family 4 member F OS=Mus musculus GN=Clec4f PE=1 SV=1 - [CLC4F_MOUSE]	P70194	0.0369947	1.43186	1.838	0.878138	0	0.0579602	0.0579602		Keratin, type I cytoskeletal 10 OS=Mus musculus GN=Krt10 PE=1 SV=3 - [K1C10_MOUSE]	P02535	0.356409	0.448051	1.63152	0.706215	0	0.0463167	0.0463167		C-reactive protein OS=Mus musculus GN=Crp PE=1 SV=2 - [CRP_MOUSE]	P14847	0.340145	0.468336	1.86693	0.900666	0	0.0684308	0.0684308			Ig kappa chain V-III region PC 2880/PC 1229 OS=Mus musculus PE=1 SV=1 - [KV3A1_MOUSE]	P01654	0.396014	0.402289	1.16241	0.217123	1.2007	1.01399	1.2007		Ig kappa chain V-V region HP R16,7 OS=Mus musculus PE=1 SV=1 - [KV5AB_MOUSE]	P01644	0.568615	0.245182	1.10119	0.139064	2.28805	2.09156	2.28805
Keratin, type II cytoskeletal 79 OS=Mus musculus GN=Krt79 PE=1 SV=2 - [K2C79_MOUSE]	Q8VED5	0.529998	0.275726	1.80621	0.852964	0	0.0693075	0.0693075		Apolipoprotein A-I OS=Mus musculus GN=Apoa1 PE=1 SV=2 - [APOA1_MOUSE]	Q00623	0.00643087	2.19173	1.63099	0.705746	0.894864	1.46041	1.46041		Alpha-enolase OS=Mus musculus GN=Eno1 PE=1 SV=3 - [ENOA_MOUSE]	P17182	0.436004	0.36051	1.83611	0.876651	0	0.0701822	0.0701822			Pregnancy zone protein OS=Mus musculus GN=Pzp PE=1 SV=3 - [PZP_MOUSE]	Q61838	0.571814	0.242745	1.1597	0.213749	0.890307	0.747728	0.890307		Ig gamma-2A chain C region, A allele OS=Mus musculus GN=Ighg PE=1 SV=1 - [GCAA_MOUSE]	P01863	0.859994	0.0655045	1.09901	0.136205	1.37827	1.37516	1.37827
Proteasome subunit alpha type-1 OS=Mus musculus GN=Psma1 PE=1 SV=1 - [PSA1_MOUSE]	Q9R1P4	0.514386	0.288711	1.77655	0.829081	0	0.0540012	0.0540012		Myosin-14 OS=Mus musculus GN=Myh14 PE=1 SV=1 - [MYH14_MOUSE]	Q6URW6	0.48191	0.317034	1.61636	0.692749	0.00739594	0	0		Complement component C9 OS=Mus musculus GN=C9 PE=1 SV=2 - [CO9_MOUSE]	P06683	0.0866922	1.06202	1.83564	0.876287	0	0.0279894	0.0279894			C-type lectin domain family 4 member F OS=Mus musculus GN=Clec4f PE=1 SV=1 - [CLC4F_MOUSE]	P70194	0.704917	0.151862	1.15831	0.212018	0.0579602	0.0369753	0.0579602		Ig mu chain C region OS=Mus musculus GN=Ighm PE=1 SV=2 - [IGHM_MOUSE]	P01872	0.450865	0.345953	1.08621	0.119304	4.84836	4.42651	4.84836
Actin, cytoplasmic 1 OS=Mus musculus GN=Actb PE=1 SV=1 - [ACTB_MOUSE]	P60710	0.0891087	1.05008	1.76122	0.816579	0.23813	0.416806	0.416806		Transferrin receptor protein 1 OS=Mus musculus GN=Tfrc PE=1 SV=1 - [TFR1_MOUSE]	Q62351	0.214281	0.669016	1.601	0.678971	0.212818	0.350604	0.350604		Myosin-14 OS=Mus musculus GN=Myh14 PE=1 SV=1 - [MYH14_MOUSE]	Q6URW6	0.404882	0.392672	1.82664	0.869192	0.00739594	0	0			Ig kappa chain V-II region MOPC 511 OS=Mus musculus PE=1 SV=1 - [KV2A3_MOUSE]	P01628	0.724665	0.139863	1.1344	0.181928	0.553951	0.486062	0.553951		Proteasome subunit beta type-3 OS=Mus musculus GN=Psmb3 PE=1 SV=1 - [PSB3_MOUSE]	Q9R1P1	0.913893	0.0391046	1.07569	0.105267	0.138961	0.07557	0.138961
Serine protease inhibitor A3K OS=Mus musculus GN=Serpina3k PE=1 SV=2 - [SPA3K_MOUSE]	P07759	0.00273432	2.56315	1.74741	0.805219	0.513539	0.897492	0.897492		Integrin alpha-IIb OS=Mus musculus GN=Itga2b PE=1 SV=2 - [ITA2B_MOUSE]	Q9QUM0	0.335981	0.473685	1.59128	0.670186	0	0.0438526	0.0438526		Actin, cytoplasmic 1 OS=Mus musculus GN=Actb PE=1 SV=1 - [ACTB_MOUSE]	P60710	0.0938448	1.02759	1.79179	0.841404	0.23813	0.424923	0.424923			Ig kappa chain V-VI region XRPC 44 OS=Mus musculus PE=1 SV=1 - [KV6A1_MOUSE]	P01675	0.689446	0.1615	1.1344	0.181928	0.626333	0.522399	0.626333		Complement C3 OS=Mus musculus GN=C3 PE=1 SV=3 - [CO3_MOUSE]	P01027	0.719563	0.142931	1.0709	0.0988286	0.52879	0.494113	0.52879
Matrix metalloproteinase-19 OS=Mus musculus GN=Mmp19 PE=2 SV=1 - [MMP19_MOUSE]	Q9JHI0	0.349333	0.456761	1.74622	0.804232	0	0.0496171	0.0496171		C-type lectin domain family 4 member F OS=Mus musculus GN=Clec4f PE=1 SV=1 - [CLC4F_MOUSE]	P70194	0.368605	0.433439	1.5868	0.66612	0	0.0369753	0.0369753		Keratin, type I cytoskeletal 13 OS=Mus musculus GN=Krt13 PE=1 SV=2 - [K1C13_MOUSE]	P08730	0.528089	0.277293	1.78739	0.837851	0	0.0545097	0.0545097			Lipopolysaccharide-binding protein OS=Mus musculus GN=Lbp PE=1 SV=2 - [LBP_MOUSE]	Q61805	0.240386	0.61909	1.1344	0.181928	0.152297	0.135833	0.152297		Ig heavy chain V region 3-6 OS=Mus musculus GN=Ighv3-6 PE=1 SV=1 - [HVM60_MOUSE]	P18531	0.735982	0.133133	1.06831	0.0953321	0.88824	0.818662	0.88824
Ig heavy chain V region 3 OS=Mus musculus GN=Ighv1-61 PE=1 SV=1 - [HVM05_MOUSE]	P01749	0.150851	0.821453	1.73659	0.796258	0.320229	0.545683	0.545683		Ig kappa chain V-V region K2 (Fragment) OS=Mus musculus PE=1 SV=1 - [KV5A3_MOUSE]	P01635	0.0928988	1.03199	1.58458	0.664097	0.924335	1.48096	1.48096		Gelsolin OS=Mus musculus GN=Gsn PE=1 SV=3 - [GELS_MOUSE]	P13020	0.0934803	1.02928	1.77092	0.8245	0.298772	0.527351	0.527351			Complement component C9 OS=Mus musculus GN=C9 PE=1 SV=2 - [CO9_MOUSE]	P06683	0.623364	0.205258	1.12537	0.170401	0.038601	0.0287712	0.038601		Ras-related protein Rap-1A OS=Mus musculus GN=Rap1a PE=1 SV=1 - [RAP1A_MOUSE]	P62835	0.739759	0.13091	1.06631	0.0926334	0.114038	0.124033	0.114038
Proteasome subunit beta type-4 OS=Mus musculus GN=Psmb4 PE=1 SV=1 - [PSB4_MOUSE]	P99026	0.485273	0.314014	1.71791	0.780655	0	0.0548001	0.0548001		Gelsolin OS=Mus musculus GN=Gsn PE=1 SV=3 - [GELS_MOUSE]	P13020	0.0946956	1.02367	1.56442	0.645624	0.298772	0.46276	0.46276		Proteasome subunit alpha type-2 OS=Mus musculus GN=Psma2 PE=1 SV=3 - [PSA2_MOUSE]	P49722	0.626957	0.202762	1.76696	0.821268	0.0629468	0.100402	0.100402			Ig heavy chain V region M511 OS=Mus musculus PE=1 SV=1 - [HVM21_MOUSE]	P01790	0.535093	0.271571	1.12276	0.167055	1.15734	1.03811	1.15734		Lipopolysaccharide-binding protein OS=Mus musculus GN=Lbp PE=1 SV=2 - [LBP_MOUSE]	Q61805	0.924288	0.0341929	1.04257	0.0601374	0.152297	0.144131	0.152297
Hemoglobin subunit beta-1 OS=Mus musculus GN=Hbb-b1 PE=1 SV=2 - [HBB1_MOUSE]	P02088	0.148582	0.828033	1.68816	0.755451	0.524402	0.908122	0.908122		Hemoglobin subunit alpha OS=Mus musculus GN=Hba PE=1 SV=2 - [HBA_MOUSE]	P01942	0.0827904	1.08202	1.56241	0.643776	0.330386	0.520893	0.520893		Hypoxia up-regulated protein 1 OS=Mus musculus GN=Hyou1 PE=1 SV=1 - [HYOU1_MOUSE]	Q9JKR6	0.134529	0.871185	1.7213	0.783498	0	0.0156085	0.0156085			Serum albumin OS=Mus musculus GN=Alb PE=1 SV=3 - [ALBU_MOUSE]	P07724	0.148024	0.829668	1.11429	0.156128	1.48726	1.33728	1.48726		Filamin-A OS=Mus musculus GN=Flna PE=1 SV=5 - [FLNA_MOUSE]	Q8BTM8	0.519286	0.284593	1.04108	0.0580853	0.0681715	0.0653117	0.0681715
Ig kappa chain V-III region PC 2880/PC 1229 OS=Mus musculus PE=1 SV=1 - [KV3A1_MOUSE]	P01654	0.148583	0.828032	1.68816	0.755451	0.693351	1.2007	1.2007		Murinoglobulin-1 OS=Mus musculus GN=Mug1 PE=1 SV=3 - [MUG1_MOUSE]	P28665	0.124249	0.905707	1.54852	0.630888	0.241213	0.378844	0.378844		Glucose-6-phosphate isomerase OS=Mus musculus GN=Gpi PE=1 SV=4 - [G6PI_MOUSE]	P06745	0.052248	1.28193	1.70898	0.773135	0	0.0627883	0.0627883			Apolipoprotein A-IV OS=Mus musculus GN=Apoa4 PE=1 SV=3 - [APOA4_MOUSE]	P06728	0.850052	0.0705544	1.11148	0.152481	0.157727	0.149349	0.157727		Proteasome subunit alpha type-1 OS=Mus musculus GN=Psma1 PE=1 SV=1 - [PSA1_MOUSE]	Q9R1P4	0.933356	0.0299527	1.04108	0.0580789	0.0540012	0	0.0540012
Keratin, type I cytoskeletal 17 OS=Mus musculus GN=Krt17 PE=1 SV=3 - [K1C17_MOUSE]	Q9QWL7	0.594332	0.225971	1.67938	0.747926	0	0.0662568	0.0662568		Murinoglobulin-2 OS=Mus musculus GN=Mug2 PE=1 SV=2 - [MUG2_MOUSE]	P28666	0.176716	0.752723	1.53993	0.622866	0.117205	0.177086	0.177086		Transforming growth factor-beta-induced protein ig-h3 OS=Mus musculus GN=Tgfbi PE=1 SV=1 - [BGH3_MOUSE]	P82198	0.180726	0.74298	1.69985	0.765408	0	0.0295675	0.0295675			Ig heavy chain V region 441 OS=Mus musculus PE=4 SV=1 - [HVM36_MOUSE]	P01806	0.374192	0.426906	1.11148	0.152481	0.70159	0.645931	0.70159		Band 3 anion transport protein OS=Mus musculus GN=Slc4a1 PE=1 SV=1 - [B3AT_MOUSE]	P04919	0.928014	0.0324454	1.02951	0.0419548	0.0516486	0.021386	0.0516486
Inter-alpha-trypsin inhibitor heavy chain H1 OS=Mus musculus GN=Itih1 PE=1 SV=2 - [ITIH1_MOUSE]	Q61702	0.323055	0.490724	1.64962	0.722132	0.0992063	0.154552	0.154552		Pyruvate kinase PKM OS=Mus musculus GN=Pkm PE=1 SV=4 - [KPYM_MOUSE]	P52480	0.125948	0.899808	1.51884	0.602969	0.258991	0.392112	0.392112		Keratin, type II cytoskeletal 1 OS=Mus musculus GN=Krt1 PE=1 SV=4 - [K2C1_MOUSE]	P04104	0.147977	0.829805	1.66569	0.73612	0.0635295	0.103331	0.103331			Haptoglobin OS=Mus musculus GN=Hp PE=1 SV=1 - [HPT_MOUSE]	Q61646	0.731334	0.135884	1.09517	0.131154	0.0411733	0.0460327	0.0411733		Serotransferrin OS=Mus musculus GN=Tf PE=1 SV=1 - [TRFE_MOUSE]	Q921I1	0.863004	0.0639873	1.02378	0.0339038	0.260279	0.258953	0.260279
Murinoglobulin-2 OS=Mus musculus GN=Mug2 PE=1 SV=2 - [MUG2_MOUSE]	P28666	0.276522	0.558271	1.64092	0.714508	0.117205	0.195084	0.195084		Clusterin OS=Mus musculus GN=Clu PE=1 SV=1 - [CLUS_MOUSE]	Q06890	0.13095	0.882896	1.51855	0.602697	0.593573	0.901499	0.901499		Lactotransferrin OS=Mus musculus GN=Ltf PE=1 SV=4 - [TRFL_MOUSE]	P08071	0.274137	0.562032	1.64239	0.715799	0.095481	0.148874	0.148874			Inter alpha-trypsin inhibitor, heavy chain 4 OS=Mus musculus GN=Itih4 PE=1 SV=2 - [ITIH4_MOUSE]	A6X935	0.730259	0.136523	1.08965	0.123859	0.437658	0.410848	0.437658		Ig heavy chain V region AC38 205,12 OS=Mus musculus PE=1 SV=1 - [HVM51_MOUSE]	P06330	0.896873	0.047269	1.02378	0.0339037	2.24419	2.21812	2.24419
Complement component C8 alpha chain OS=Mus musculus GN=C8a PE=1 SV=1 - [CO8A_MOUSE]	Q8K182	0.156259	0.806154	1.62443	0.699935	0.0877728	0.143702	0.143702		Band 3 anion transport protein OS=Mus musculus GN=Slc4a1 PE=1 SV=1 - [B3AT_MOUSE]	P04919	0.0437009	1.35951	1.48224	0.567775	0.0322165	0.0479104	0.0479104		Insulin-like growth factor-binding protein complex acid labile subunit OS=Mus musculus GN=Igfals PE=1 SV=1 - [ALS_MOUSE]	P70389	0.200369	0.698169	1.63455	0.708891	0	0.0847729	0.0847729			Ig lambda-2 chain C region OS=Mus musculus GN=Iglc2 PE=1 SV=1 - [LAC2_MOUSE]	P01844	0.050076	1.30037	1.0861	0.119163	1.64854	1.51842	1.64854		Murinoglobulin-1 OS=Mus musculus GN=Mug1 PE=1 SV=3 - [MUG1_MOUSE]	P28665	0.872624	0.0591729	1.01948	0.0278359	0.377372	0.362	0.377372
Band 3 anion transport protein OS=Mus musculus GN=Slc4a1 PE=1 SV=1 - [B3AT_MOUSE]	P04919	0.0455879	1.34115	1.59516	0.673702	0.0322165	0.0516486	0.0516486		Ig kappa chain V-V region L6 (Fragment) OS=Mus musculus PE=4 SV=1 - [KV5A6_MOUSE]	P01638	0.150035	0.823806	1.48224	0.567775	0.897808	1.31601	1.31601		Beta-enolase OS=Mus musculus GN=Eno3 PE=1 SV=3 - [ENOB_MOUSE]	P21550	0.0761763	1.11818	1.6305	0.705312	0	0.083807	0.083807			C4b-binding protein OS=Mus musculus GN=C4bpa PE=1 SV=3 - [C4BPA_MOUSE]	P08607	0.871405	0.0597798	1.08137	0.112861	0.0464519	0	0.0464519		Ig gamma-3 chain C region OS=Mus musculus PE=1 SV=2 - [IGHG3_MOUSE]	P03987	0.935745	0.0288423	1.01904	0.0272142	0.818355	0.820163	0.818355
Ig kappa chain V-V region K2 (Fragment) OS=Mus musculus PE=1 SV=1 - [KV5A3_MOUSE]	P01635	0.0145949	1.8358	1.59335	0.672064	0.924335	1.47472	1.47472		Keratin, type II cytoskeletal 6A OS=Mus musculus GN=Krt6a PE=1 SV=3 - [K2C6A_MOUSE]	P50446	0.215953	0.665641	1.48224	0.567775	0.0697492	0.102365	0.102365		Ceruloplasmin OS=Mus musculus GN=Cp PE=1 SV=2 - [CERU_MOUSE]	Q61147	0.10594	0.974938	1.61511	0.69163	0.047874	0.0429726	0.0429726			Band 3 anion transport protein OS=Mus musculus GN=Slc4a1 PE=1 SV=1 - [B3AT_MOUSE]	P04919	0.759458	0.119496	1.07619	0.105927	0.0516486	0.0479104	0.0516486		Ig kappa chain V region Mem5 (Fragment) OS=Mus musculus PE=1 SV=1 - [KVM5_MOUSE]	P84750	0.885698	0.0527141	1.0188	0.0268772	0.12041	0.130964	0.12041
Apolipoprotein A-I OS=Mus musculus GN=Apoa1 PE=1 SV=2 - [APOA1_MOUSE]	Q00623	0.0892524	1.04938	1.5649	0.646069	0.894864	1.41461	1.41461		Lysozyme C-2 OS=Mus musculus GN=Lyz2 PE=1 SV=2 - [LYZ2_MOUSE]	P08905	0.257027	0.590021	1.48224	0.567775	0.249746	0.363955	0.363955		Clusterin OS=Mus musculus GN=Clu PE=1 SV=1 - [CLUS_MOUSE]	Q06890	0.106495	0.972669	1.60639	0.683818	0.593573	0.953686	0.953686			Ig heavy chain V region MOPC 21 (Fragment) OS=Mus musculus PE=1 SV=1 - [HVM16_MOUSE]	P01783	0.901893	0.0448448	1.07619	0.105927	0.548091	0.462207	0.548091		Ig heavy chain V region MOPC 47A OS=Mus musculus PE=1 SV=1 - [HVM17_MOUSE]	P01786	0.978273	0.00954015	1.00946	0.0135828	0.759594	0.741224	0.759594
Keratin, type I cytoskeletal 15 OS=Mus musculus GN=Krt15 PE=1 SV=2 - [K1C15_MOUSE]	Q61414	0.538882	0.268506	1.56214	0.643522	0	0.0397988	0.0397988		Tubulin beta-1 chain OS=Mus musculus GN=Tubb1 PE=1 SV=1 - [TBB1_MOUSE]	A2AQ07	0.257027	0.590021	1.48224	0.567775	0.0826315	0.120419	0.120419		Ig heavy chain V region MOPC 21 (Fragment) OS=Mus musculus PE=1 SV=1 - [HVM16_MOUSE]	P01783	0.476825	0.321641	1.58021	0.660119	0.388736	0.56497	0.56497			Serum amyloid P-component OS=Mus musculus GN=Apcs PE=1 SV=2 - [SAMP_MOUSE]	P12246	0.759458	0.119496	1.07619	0.105927	0.375504	0.342538	0.375504		Ig heavy chain V region J539 OS=Mus musculus PE=1 SV=1 - [HVM40_MOUSE]	P01810	0.936064	0.0286945	1.00946	0.0135827	0.670545	0.660861	0.670545
Complement C4-B OS=Mus musculus GN=C4b PE=1 SV=3 - [CO4B_MOUSE]	P01029	0.00766637	2.11541	1.54352	0.62622	0.422123	0.651086	0.651086		Insulin-like growth factor-binding protein complex acid labile subunit OS=Mus musculus GN=Igfals PE=1 SV=1 - [ALS_MOUSE]	P70389	0.135019	0.869605	1.45452	0.540545	0	0.0737937	0.0737937		Serine protease inhibitor A3M OS=Mus musculus GN=Serpina3m PE=1 SV=2 - [SPA3M_MOUSE]	Q03734	0.060051	1.22148	1.57283	0.653361	0.424213	0.664905	0.664905			Kinesin-1 heavy chain OS=Mus musculus GN=Kif5b PE=1 SV=3 - [KINH_MOUSE]	Q61768	0.8179	0.0872996	1.07585	0.105474	0.0145642	0	0.0145642		Ig kappa chain V-V region HP 124E1 OS=Mus musculus PE=1 SV=1 - [KV5AE_MOUSE]	P01647	0.993613	0.00278285	1.00166	0.00239882	1.78071	1.77221	1.78071
Glucose-6-phosphate isomerase OS=Mus musculus GN=Gpi PE=1 SV=4 - [G6PI_MOUSE]	P06745	0.0593608	1.2265	1.54302	0.625753	0	0.0565774	0.0565774		Ig kappa chain V-III region PC 2880/PC 1229 OS=Mus musculus PE=1 SV=1 - [KV3A1_MOUSE]	P01654	0.090757	1.04212	1.45229	0.538328	0.693351	1.01399	1.01399		Apolipoprotein A-I OS=Mus musculus GN=Apoa1 PE=1 SV=2 - [APOA1_MOUSE]	Q00623	0.0644006	1.19111	1.57115	0.651821	0.894864	1.41597	1.41597			Pigment epithelium-derived factor OS=Mus musculus GN=Serpinf1 PE=1 SV=2 - [PEDF_MOUSE]	P97298	0.898977	0.0462513	1.07087	0.0987885	0.0345099	0	0.0345099		Alpha-2-macroglobulin-P OS=Mus musculus GN=A2m PE=2 SV=2 - [A2MG_MOUSE]	Q6GQT1	1	-4.34294e-08	1	0	0	0	0
Ig alpha chain C region OS=Mus musculus PE=1 SV=1 - [IGHA_MOUSE]	P01878	0.207611	0.682749	1.52385	0.607723	1.17215	1.82763	1.82763		Ectonucleotide pyrophosphatase/phosphodiesterase family member 2 OS=Mus musculus GN=Enpp2 PE=1 SV=3 - [ENPP2_MOUSE]	Q9R1E6	0.484409	0.314788	1.43821	0.524271	0	0.0409501	0.0409501		Inter-alpha-trypsin inhibitor heavy chain H2 OS=Mus musculus GN=Itih2 PE=1 SV=1 - [ITIH2_MOUSE]	Q61703	0.189204	0.72307	1.57043	0.651158	0.133171	0.214349	0.214349			Murinoglobulin-2 OS=Mus musculus GN=Mug2 PE=1 SV=2 - [MUG2_MOUSE]	P28666	0.813488	0.0896489	1.06558	0.0916421	0.195084	0.177086	0.195084		Beta-2-glycoprotein 1 OS=Mus musculus GN=Apoh PE=1 SV=1 - [APOH_MOUSE]	Q01339	1	-4.34294e-08	1	0	0	0	0
Keratin, type II cytoskeletal 1 OS=Mus musculus GN=Krt1 PE=1 SV=4 - [K2C1_MOUSE]	P04104	0.210559	0.676626	1.50393	0.588739	0.0635295	0.0933525	0.0933525		Actin, cytoplasmic 1 OS=Mus musculus GN=Actb PE=1 SV=1 - [ACTB_MOUSE]	P60710	0.202752	0.693034	1.43198	0.518007	0.23813	0.339576	0.339576		Keratin, type I cytoskeletal 16 OS=Mus musculus GN=Krt16 PE=1 SV=3 - [K1C16_MOUSE]	Q9Z2K1	0.117815	0.928799	1.56423	0.64545	0	0.033627	0.033627			Ig kappa chain V-III region PC 7210 OS=Mus musculus PE=1 SV=1 - [KV3AG_MOUSE]	P01668	0.894044	0.048641	1.06113	0.0856057	0.906556	0.826966	0.906556		Fibrinogen gamma chain OS=Mus musculus GN=Fgg PE=1 SV=1 - [FIBG_MOUSE]	Q8VCM7	1	-4.34294e-08	1	0	0	0	0
Tubulin beta-1 chain OS=Mus musculus GN=Tubb1 PE=1 SV=1 - [TBB1_MOUSE]	A2AQ07	0.210559	0.676626	1.50393	0.588739	0.0826315	0.121422	0.121422		Mannose-binding protein C OS=Mus musculus GN=Mbl2 PE=1 SV=2 - [MBL2_MOUSE]	P41317	0.419053	0.377731	1.39746	0.482812	0.254879	0.355636	0.355636		Band 3 anion transport protein OS=Mus musculus GN=Slc4a1 PE=1 SV=1 - [B3AT_MOUSE]	P04919	0.106176	0.973975	1.54944	0.631747	0.0322165	0.021386	0.021386			Complement component C8 beta chain OS=Mus musculus GN=C8b PE=1 SV=1 - [CO8B_MOUSE]	Q8BH35	0.831768	0.0799976	1.05607	0.0787027	0.230418	0.206725	0.230418		Fructose-bisphosphate aldolase A OS=Mus musculus GN=Aldoa PE=1 SV=2 - [ALDOA_MOUSE]	P05064	1	-4.34294e-08	1	0	0	0	0
Murinoglobulin-1 OS=Mus musculus GN=Mug1 PE=1 SV=3 - [MUG1_MOUSE]	P28665	0.291803	0.53491	1.50262	0.587485	0.241213	0.377372	0.377372		Ig heavy chain V region 914 OS=Mus musculus PE=1 SV=1 - [HVM56_MOUSE]	P18527	0.26601	0.575102	1.37228	0.456579	1.32869	1.79287	1.79287		Keratin, type I cytoskeletal 10 OS=Mus musculus GN=Krt10 PE=1 SV=3 - [K1C10_MOUSE]	P02535	0.419865	0.37689	1.54627	0.628788	0	0.0450582	0.0450582			Ectonucleotide pyrophosphatase/phosphodiesterase family member 2 OS=Mus musculus GN=Enpp2 PE=1 SV=3 - [ENPP2_MOUSE]	Q9R1E6	0.826493	0.0827609	1.04423	0.0624368	0.0161355	0.0409501	0.0161355		Glyceraldehyde-3-phosphate dehydrogenase OS=Mus musculus GN=Gapdh PE=1 SV=2 - [G3P_MOUSE]	P16858	1	-4.34294e-08	1	0	0	0	0
Ectonucleotide pyrophosphatase/phosphodiesterase family member 2 OS=Mus musculus GN=Enpp2 PE=1 SV=3 - [ENPP2_MOUSE]	Q9R1E6	0.496379	0.304187	1.50182	0.586708	0	0.0161355	0.0161355		Ig heavy chain V region MOPC 21 (Fragment) OS=Mus musculus PE=1 SV=1 - [HVM16_MOUSE]	P01783	0.61393	0.211881	1.32575	0.406811	0.388736	0.462207	0.462207		Kininogen-1 OS=Mus musculus GN=Kng1 PE=1 SV=1 - [KNG1_MOUSE]	O08677	0.119756	0.921702	1.53774	0.620814	0.215294	0.328902	0.328902			Apolipoprotein B-100 OS=Mus musculus GN=Apob PE=1 SV=1 - [APOB_MOUSE]	E9Q414	0.868651	0.0611546	1.03969	0.0561589	0.0649615	0.0594749	0.0649615		Heat shock 70 kDa protein 1-like OS=Mus musculus GN=Hspa1l PE=1 SV=4 - [HS71L_MOUSE]	P16627	1	-4.34294e-08	1	0	0	0	0
Ig kappa chain V-V region MOPC 149 OS=Mus musculus PE=1 SV=1 - [KV5A4_MOUSE]	P01636	0.476454	0.321979	1.4829	0.568418	0.625072	0.900512	0.900512		Ig gamma-1 chain C region secreted form OS=Mus musculus GN=Ighg1 PE=1 SV=1 - [IGHG1_MOUSE]	P01868	0.182509	0.738716	1.30721	0.38649	0.604069	0.793887	0.793887		Heparin cofactor 2 OS=Mus musculus GN=Serpind1 PE=1 SV=1 - [HEP2_MOUSE]	P49182	0.0420378	1.37636	1.48419	0.56968	0	0.0318441	0.0318441			Ig gamma-1 chain C region secreted form OS=Mus musculus GN=Ighg1 PE=1 SV=1 - [IGHG1_MOUSE]	P01868	0.222157	0.65334	1.03514	0.0498219	0.823075	0.793887	0.823075		Ig heavy chain V region 5-84 OS=Mus musculus PE=1 SV=1 - [HVM54_MOUSE]	P18525	1	-4.34294e-08	1	0	0	0	0
Transferrin receptor protein 1 OS=Mus musculus GN=Tfrc PE=1 SV=1 - [TFR1_MOUSE]	Q62351	0.095801	1.01863	1.45618	0.542184	0.212818	0.310667	0.310667		Complement component C9 OS=Mus musculus GN=C9 PE=1 SV=2 - [CO9_MOUSE]	P06683	0.520104	0.28391	1.2619	0.335593	0	0.0287712	0.0287712		Ezrin OS=Mus musculus GN=Ezr PE=1 SV=3 - [EZRI_MOUSE]	P26040	0.61334	0.212299	1.47472	0.560442	0	0.0635562	0.0635562			Serine protease inhibitor A3M OS=Mus musculus GN=Serpina3m PE=1 SV=2 - [SPA3M_MOUSE]	Q03734	0.867336	0.0618128	1.03037	0.0431613	0.465852	0.457862	0.465852		Ig heavy chain V region M603 OS=Mus musculus PE=1 SV=1 - [HVM20_MOUSE]	P01789	1	-4.34294e-08	1	0	0	0	0
Proteasome subunit alpha type-7 OS=Mus musculus GN=Psma7 PE=1 SV=1 - [PSA7_MOUSE]	Q9Z2U0	0.600125	0.221758	1.45154	0.537587	0	0.05728	0.05728		Ig alpha chain C region OS=Mus musculus PE=1 SV=1 - [IGHA_MOUSE]	P01878	0.0881556	1.05475	1.25426	0.32684	1.17215	1.46938	1.46938		Murinoglobulin-1 OS=Mus musculus GN=Mug1 PE=1 SV=3 - [MUG1_MOUSE]	P28665	0.181011	0.742294	1.47391	0.55965	0.241213	0.362	0.362			Keratin, type II cytoskeletal 79 OS=Mus musculus GN=Krt79 PE=1 SV=2 - [K2C79_MOUSE]	Q8VED5	0.975208	0.0109029	1.02487	0.035447	0.0693075	0	0.0693075		Ig kappa chain V-I region S107A OS=Mus musculus GN=Igkv7-33 PE=2 SV=1 - [KV1A1_MOUSE]	P01632	1	-4.34294e-08	1	0	0	0	0
Keratin, type II cytoskeletal 6A OS=Mus musculus GN=Krt6a PE=1 SV=3 - [K2C6A_MOUSE]	P50446	0.547874	0.261319	1.44995	0.536007	0.0697492	0.0806699	0.0806699		Tubulin beta-4B chain OS=Mus musculus GN=Tubb4b PE=1 SV=1 - [TBB4B_MOUSE]	P68372	0.529506	0.276129	1.25272	0.325061	0.18425	0.221054	0.221054		Keratin, type II cytoskeletal 6A OS=Mus musculus GN=Krt6a PE=1 SV=3 - [K2C6A_MOUSE]	P50446	0.237766	0.62385	1.46407	0.549983	0.0697492	0.0438701	0.0438701			Ig mu chain C region OS=Mus musculus GN=Ighm PE=1 SV=2 - [IGHM_MOUSE]	P01872	0.66536	0.176943	1.02078	0.0296661	4.84836	4.72699	4.84836		Ig kappa chain V-II region VKappa167 OS=Mus musculus GN=Gm5153 PE=4 SV=1 - [KV2A2_MOUSE]	P01627	1	-4.34294e-08	1	0	0	0	0
Ig heavy chain V region MOPC 21 (Fragment) OS=Mus musculus PE=1 SV=1 - [HVM16_MOUSE]	P01783	0.641184	0.193017	1.42675	0.512737	0.388736	0.548091	0.548091		Complement C1q subcomponent subunit B OS=Mus musculus GN=C1qb PE=1 SV=2 - [C1QB_MOUSE]	P14106	0.129047	0.889252	1.24993	0.321848	0.932716	1.17009	1.17009		Coagulation factor V OS=Mus musculus GN=F5 PE=1 SV=1 - [FA5_MOUSE]	O88783	0.189689	0.721958	1.45052	0.536572	0.104096	0.1537	0.1537			Coagulation factor XIII A chain OS=Mus musculus GN=F13a1 PE=1 SV=3 - [F13A_MOUSE]	Q8BH61	0.926957	0.0329404	1.01464	0.0209643	0.0853576	0.0837174	0.0853576		Ig kappa chain V-III region PC 3741/TEPC 111 OS=Mus musculus PE=1 SV=1 - [KV3A8_MOUSE]	P01660	1	-4.34294e-08	1	0	0	0	0
Complement component C9 OS=Mus musculus GN=C9 PE=1 SV=2 - [CO9_MOUSE]	P06683	0.528818	0.276694	1.4201	0.505994	0	0.038601	0.038601		Antithrombin-III OS=Mus musculus GN=Serpinc1 PE=1 SV=1 - [ANT3_MOUSE]	P32261	0.0957128	1.01903	1.22877	0.297211	1.38769	1.70243	1.70243		Murinoglobulin-2 OS=Mus musculus GN=Mug2 PE=1 SV=2 - [MUG2_MOUSE]	P28666	0.325841	0.486994	1.44634	0.532408	0.117205	0.169442	0.169442			Ig heavy chain V region VH558 A1/A4 OS=Mus musculus GN=Gm5629 PE=2 SV=1 - [HVM52_MOUSE]	P06327	0.926957	0.0329404	1.01464	0.0209643	0.486066	0.468285	0.486066		Ig kappa chain V-III region PC 7175 OS=Mus musculus PE=1 SV=1 - [KV3AJ_MOUSE]	P01671	1	-4.34294e-08	1	0	0	0	0
Myosin-14 OS=Mus musculus GN=Myh14 PE=1 SV=1 - [MYH14_MOUSE]	Q6URW6	0.6207	0.207118	1.38379	0.46863	0.00739594	0	0		Multimerin-1 OS=Mus musculus GN=Mmrn1 PE=1 SV=2 - [MMRN1_MOUSE]	B2RPV6	0.742046	0.129569	1.21461	0.280496	0	0.0131064	0.0131064		Tubulin beta-4B chain OS=Mus musculus GN=Tubb4b PE=1 SV=1 - [TBB4B_MOUSE]	P68372	0.412392	0.38469	1.44253	0.528602	0.18425	0.259397	0.259397			Ig heavy chain V region 3 OS=Mus musculus GN=Ighv1-61 PE=1 SV=1 - [HVM05_MOUSE]	P01749	0.926957	0.0329404	1.01464	0.0209642	0.545683	0.535198	0.545683		Ig kappa chain V-III region PC 7940 OS=Mus musculus PE=1 SV=1 - [KV3AK_MOUSE]	P01672	1	-4.34294e-08	1	0	0	0	0
Ceruloplasmin OS=Mus musculus GN=Cp PE=1 SV=2 - [CERU_MOUSE]	Q61147	0.129283	0.888457	1.3729	0.457222	0.047874	0.0652092	0.0652092		Ig kappa chain V-VI region XRPC 44 OS=Mus musculus PE=1 SV=1 - [KV6A1_MOUSE]	P01675	0.254946	0.593552	1.21024	0.275293	0.428652	0.522399	0.522399		Ig heavy chain V region 3 OS=Mus musculus GN=Ighv1-61 PE=1 SV=1 - [HVM05_MOUSE]	P01749	0.281619	0.550338	1.44253	0.528601	0.320229	0.45419	0.45419			Tubulin beta-1 chain OS=Mus musculus GN=Tubb1 PE=1 SV=1 - [TBB1_MOUSE]	A2AQ07	0.942904	0.0255326	1.01464	0.0209641	0.121422	0.120419	0.121422		Ig kappa chain V-V region MOPC 21 OS=Mus musculus PE=1 SV=1 - [KV5A2_MOUSE]	P01634	1	-4.34294e-08	1	0	0	0	0
Ig kappa chain V-VI region XRPC 44 OS=Mus musculus PE=1 SV=1 - [KV6A1_MOUSE]	P01675	0.468983	0.328843	1.3729	0.457222	0.428652	0.626333	0.626333		Keratin, type II cytoskeletal 1 OS=Mus musculus GN=Krt1 PE=1 SV=4 - [K2C1_MOUSE]	P04104	0.502992	0.298439	1.21024	0.275293	0.0635295	0.075316	0.075316		Complement component C8 beta chain OS=Mus musculus GN=C8b PE=1 SV=1 - [CO8B_MOUSE]	Q8BH35	0.176684	0.752802	1.42235	0.50828	0.176037	0.247579	0.247579			Ig gamma-2A chain C region, A allele OS=Mus musculus GN=Ighg PE=1 SV=1 - [GCAA_MOUSE]	P01863	0.952249	0.0212496	1.01171	0.0167998	1.37827	1.37578	1.37827		Ig kappa chain V-V region T1 OS=Mus musculus PE=4 SV=1 - [KV5A5_MOUSE]	P01637	1	-4.34294e-08	1	0	0	0	0
Lipopolysaccharide-binding protein OS=Mus musculus GN=Lbp PE=1 SV=2 - [LBP_MOUSE]	Q61805	0.357899	0.446239	1.3729	0.457222	0.109872	0.152297	0.152297		Lipopolysaccharide-binding protein OS=Mus musculus GN=Lbp PE=1 SV=2 - [LBP_MOUSE]	Q61805	0.599729	0.222045	1.21024	0.275293	0.109872	0.135833	0.135833		Inter-alpha-trypsin inhibitor heavy chain H3 OS=Mus musculus GN=Itih3 PE=1 SV=3 - [ITIH3_MOUSE]	Q61704	0.56951	0.244499	1.36813	0.452209	0.033441	0	0			Complement C1q subcomponent subunit C OS=Mus musculus GN=C1qc PE=1 SV=2 - [C1QC_MOUSE]	Q02105	0.193925	0.712366	1.0104	0.0149278	1.04849	1.03772	1.04849		Ig kappa chain V-VI region NQ5-61,1,2 OS=Mus musculus PE=2 SV=1 - [KV6A8_MOUSE]	P04942	1	-4.34294e-08	1	0	0	0	0
Heparin cofactor 2 OS=Mus musculus GN=Serpind1 PE=1 SV=1 - [HEP2_MOUSE]	P49182	0.67127	0.173103	1.3643	0.44816	0	0.0538285	0.0538285		Alpha-2-HS-glycoprotein OS=Mus musculus GN=Ahsg PE=1 SV=1 - [FETUA_MOUSE]	P29699	0.825395	0.083338	1.19501	0.257023	0.0655856	0.0716884	0.0716884		Mannose-binding protein C OS=Mus musculus GN=Mbl2 PE=1 SV=2 - [MBL2_MOUSE]	P41317	0.325357	0.48764	1.36003	0.443639	0.254879	0.337082	0.337082			Ig kappa chain V-V region K2 (Fragment) OS=Mus musculus PE=1 SV=1 - [KV5A3_MOUSE]	P01635	0.98278	0.00754378	1.00554	0.00796661	1.47472	1.48096	1.47472		Inhibitor of carbonic anhydrase OS=Mus musculus GN=Ica PE=1 SV=1 - [ICA_MOUSE]	Q9DBD0	1	-4.34294e-08	1	0	0	0	0
Ig gamma-1 chain C region secreted form OS=Mus musculus GN=Ighg1 PE=1 SV=1 - [IGHG1_MOUSE]	P01868	0.171994	0.764487	1.35314	0.436312	0.604069	0.823075	0.823075		Ig heavy chain V region MOPC 104E OS=Mus musculus PE=1 SV=1 - [HVM12_MOUSE]	P01756	0.616679	0.209941	1.18241	0.241736	1.082	1.22899	1.22899		Vitamin D-binding protein OS=Mus musculus GN=Gc PE=1 SV=2 - [VTDB_MOUSE]	P21614	0.500817	0.300321	1.33919	0.421359	0.0473138	0.0897168	0.0897168			Ig gamma-2A chain C region secreted form OS=Mus musculus PE=1 SV=1 - [GCAB_MOUSE]	P01864	0.97889	0.00926609	1.00483	0.00695702	1.67637	1.6578	1.67637		Integrin beta-3 OS=Mus musculus GN=Itgb3 PE=1 SV=2 - [ITB3_MOUSE]	O54890	1	-4.34294e-08	1	0	0	0	0
Ig heavy chain V-III region J606 OS=Mus musculus PE=1 SV=1 - [HVM32_MOUSE]	P01801	0.471576	0.326448	1.32634	0.407454	1.10348	1.53073	1.53073		Proteasome subunit beta type-1 OS=Mus musculus GN=Psmb1 PE=1 SV=1 - [PSB1_MOUSE]	O09061	0.867636	0.0616623	1.17472	0.232319	0.0641076	0.0859038	0.0859038		Ig alpha chain C region OS=Mus musculus PE=1 SV=1 - [IGHA_MOUSE]	P01878	0.188432	0.724846	1.33717	0.419184	1.17215	1.57957	1.57957			6-phosphogluconate dehydrogenase, decarboxylating OS=Mus musculus GN=Pgd PE=1 SV=3 - [6PGD_MOUSE]	Q9DCD0	1	-4.34294e-08	1	0	0	0	0		Leukocyte cell-derived chemotaxin-2 OS=Mus musculus GN=Lect2 PE=1 SV=1 - [LECT2_MOUSE]	O88803	1	-4.34294e-08	1	0	0	0	0
Phosphatidylinositol-glycan-specific phospholipase D OS=Mus musculus GN=Gpld1 PE=1 SV=1 - [PHLD_MOUSE]	O70362	0.136447	0.865036	1.30657	0.385782	0	0.0380803	0.0380803		Heparin cofactor 2 OS=Mus musculus GN=Serpind1 PE=1 SV=1 - [HEP2_MOUSE]	P49182	0.639055	0.194462	1.17285	0.230018	0	0.0327335	0.0327335		Lipopolysaccharide-binding protein OS=Mus musculus GN=Lbp PE=1 SV=2 - [LBP_MOUSE]	Q61805	0.321684	0.492571	1.31684	0.397084	0.109872	0.144131	0.144131			Alpha-2-macroglobulin-P OS=Mus musculus GN=A2m PE=2 SV=2 - [A2MG_MOUSE]	Q6GQT1	1	-4.34294e-08	1	0	0	0	0		L-lactate dehydrogenase A chain OS=Mus musculus GN=Ldha PE=1 SV=3 - [LDHA_MOUSE]	P06151	1	-4.34294e-08	1	0	0	0	0
Fermitin family homolog 3 OS=Mus musculus GN=Fermt3 PE=1 SV=1 - [URP2_MOUSE]	Q8K1B8	0.477611	0.320926	1.30244	0.38122	0.0439302	0.0598801	0.0598801		Complement component C8 beta chain OS=Mus musculus GN=C8b PE=1 SV=1 - [CO8B_MOUSE]	Q8BH35	0.573392	0.241548	1.17181	0.228739	0.176037	0.206725	0.206725		Alpha-2-antiplasmin OS=Mus musculus GN=Serpinf2 PE=1 SV=1 - [A2AP_MOUSE]	Q61247	0.507893	0.294228	1.27037	0.345246	0.0307547	0	0			Beta-enolase OS=Mus musculus GN=Eno3 PE=1 SV=3 - [ENOB_MOUSE]	P21550	1	-4.34294e-08	1	0	0	0	0		Lysozyme C-2 OS=Mus musculus GN=Lyz2 PE=1 SV=2 - [LYZ2_MOUSE]	P08905	1	-4.34294e-08	1	0	0	0	0
Myosin-9 OS=Mus musculus GN=Myh9 PE=1 SV=4 - [MYH9_MOUSE]	Q8VDD5	0.295604	0.529289	1.24537	0.316579	0.0439034	0.0541099	0.0541099		Complement C4-B OS=Mus musculus GN=C4b PE=1 SV=3 - [CO4B_MOUSE]	P01029	0.0569128	1.24479	1.16554	0.221003	0.422123	0.491649	0.491649		Ig kappa chain V-V region K2 (Fragment) OS=Mus musculus PE=1 SV=1 - [KV5A3_MOUSE]	P01635	0.129114	0.889027	1.23645	0.306209	0.924335	1.14664	1.14664			Fibrinogen gamma chain OS=Mus musculus GN=Fgg PE=1 SV=1 - [FIBG_MOUSE]	Q8VCM7	1	-4.34294e-08	1	0	0	0	0		Metalloproteinase inhibitor 3 OS=Mus musculus GN=Timp3 PE=1 SV=1 - [TIMP3_MOUSE]	P39876	1	-4.34294e-08	1	0	0	0	0
Gelsolin OS=Mus musculus GN=Gsn PE=1 SV=3 - [GELS_MOUSE]	P13020	0.272517	0.564606	1.2436	0.314521	0.298772	0.367695	0.367695		Alpha-2-antiplasmin OS=Mus musculus GN=Serpinf2 PE=1 SV=1 - [A2AP_MOUSE]	Q61247	0.805341	0.0940201	1.15851	0.212273	0.0307547	0	0		Pyruvate kinase PKM OS=Mus musculus GN=Pkm PE=1 SV=4 - [KPYM_MOUSE]	P52480	0.258171	0.588093	1.23531	0.304872	0.258991	0.317527	0.317527			Fructose-bisphosphate aldolase A OS=Mus musculus GN=Aldoa PE=1 SV=2 - [ALDOA_MOUSE]	P05064	1	-4.34294e-08	1	0	0	0	0		Myosin-14 OS=Mus musculus GN=Myh14 PE=1 SV=1 - [MYH14_MOUSE]	Q6URW6	1	-4.34294e-08	1	0	0	0	0
Complement component C8 beta chain OS=Mus musculus GN=C8b PE=1 SV=1 - [CO8B_MOUSE]	Q8BH35	0.654454	0.184121	1.23751	0.307442	0.176037	0.230418	0.230418		Vitronectin OS=Mus musculus GN=Vtn PE=1 SV=2 - [VTNC_MOUSE]	P29788	0.0371997	1.42946	1.11059	0.15133	1.19562	1.32758	1.32758		Carboxypeptidase N subunit 2 OS=Mus musculus GN=Cpn2 PE=1 SV=2 - [CPN2_MOUSE]	Q9DBB9	0.851393	0.0698701	1.2121	0.277504	0.0539691	0.0729389	0.0729389			Glyceraldehyde-3-phosphate dehydrogenase OS=Mus musculus GN=Gapdh PE=1 SV=2 - [G3P_MOUSE]	P16858	1	-4.34294e-08	1	0	0	0	0		Peptidyl-prolyl cis-trans isomerase A OS=Mus musculus GN=Ppia PE=1 SV=2 - [PPIA_MOUSE]	P17742	1	-4.34294e-08	1	0	0	0	0
Complement C3 OS=Mus musculus GN=C3 PE=1 SV=3 - [CO3_MOUSE]	P01027	0.0996208	1.00165	1.23501	0.304521	0.427302	0.52879	0.52879		Ceruloplasmin OS=Mus musculus GN=Cp PE=1 SV=2 - [CERU_MOUSE]	Q61147	0.797513	0.098262	1.11003	0.150594	0.047874	0.0368107	0.0368107		Complement C1q subcomponent subunit B OS=Mus musculus GN=C1qb PE=1 SV=2 - [C1QB_MOUSE]	P14106	0.0583257	1.23414	1.20115	0.264412	0.932716	1.12118	1.12118			Heat shock 70 kDa protein 1-like OS=Mus musculus GN=Hspa1l PE=1 SV=4 - [HS71L_MOUSE]	P16627	1	-4.34294e-08	1	0	0	0	0		Plasma kallikrein OS=Mus musculus GN=Klkb1 PE=1 SV=2 - [KLKB1_MOUSE]	P26262	1	-4.34294e-08	1	0	0	0	0
Coagulation factor V OS=Mus musculus GN=F5 PE=1 SV=1 - [FA5_MOUSE]	O88783	0.00727461	2.13819	1.22796	0.296258	0.104096	0.127817	0.127817		Fibrinogen gamma chain OS=Mus musculus GN=Fgg PE=1 SV=1 - [FIBG_MOUSE]	Q8VCM7	0.871513	0.0597262	1.08935	0.123466	0.0342297	0	0		Fibrinogen gamma chain OS=Mus musculus GN=Fgg PE=1 SV=1 - [FIBG_MOUSE]	Q8VCM7	0.766581	0.115442	1.20025	0.263339	0.0342297	0	0			Ig heavy chain V region 5-84 OS=Mus musculus PE=1 SV=1 - [HVM54_MOUSE]	P18525	1	-4.34294e-08	1	0	0	0	0		Platelet factor 4 OS=Mus musculus GN=Pf4 PE=1 SV=1 - [PLF4_MOUSE]	Q9Z126	1	-4.34294e-08	1	0	0	0	0
Ig lambda-1 chain C region OS=Mus musculus PE=1 SV=1 - [LAC1_MOUSE]	P01843	0.490261	0.309573	1.22796	0.296258	1.07266	1.31169	1.31169		Inter-alpha-trypsin inhibitor heavy chain H3 OS=Mus musculus GN=Itih3 PE=1 SV=3 - [ITIH3_MOUSE]	Q61704	0.767754	0.114778	1.08393	0.116268	0.033441	0	0		Antithrombin-III OS=Mus musculus GN=Serpinc1 PE=1 SV=1 - [ANT3_MOUSE]	P32261	0.161692	0.791311	1.19152	0.252808	1.38769	1.65228	1.65228			Ig heavy chain V region M603 OS=Mus musculus PE=1 SV=1 - [HVM20_MOUSE]	P01789	1	-4.34294e-08	1	0	0	0	0		Proteasome subunit alpha type-6 OS=Mus musculus GN=Psma6 PE=1 SV=1 - [PSA6_MOUSE]	Q9QUM9	1	-4.34294e-08	1	0	0	0	0
Alpha-actinin-1 OS=Mus musculus GN=Actn1 PE=1 SV=1 - [ACTN1_MOUSE]	Q7TPR4	0.358743	0.445217	1.21599	0.282131	0	0.0154804	0.0154804		Serine protease inhibitor A3M OS=Mus musculus GN=Serpina3m PE=1 SV=2 - [SPA3M_MOUSE]	Q03734	0.751948	0.123812	1.07106	0.0990352	0.424213	0.457862	0.457862		Apolipoprotein E OS=Mus musculus GN=Apoe PE=1 SV=2 - [APOE_MOUSE]	P08226	0.409438	0.387812	1.17782	0.23612	0.624897	0.74496	0.74496			Ig kappa chain V-I region S107A OS=Mus musculus GN=Igkv7-33 PE=2 SV=1 - [KV1A1_MOUSE]	P01632	1	-4.34294e-08	1	0	0	0	0		Protein S100-A9 OS=Mus musculus GN=S100a9 PE=1 SV=3 - [S10A9_MOUSE]	P31725	1	-4.34294e-08	1	0	0	0	0
Complement C1q subcomponent subunit B OS=Mus musculus GN=C1qb PE=1 SV=2 - [C1QB_MOUSE]	P14106	0.0176974	1.75209	1.16494	0.220256	0.932716	1.08645	1.08645		Proteasome subunit alpha type-2 OS=Mus musculus GN=Psma2 PE=1 SV=3 - [PSA2_MOUSE]	P49722	0.943451	0.0252805	1.06554	0.0915903	0.0629468	0	0		Ig kappa chain V-V region L6 (Fragment) OS=Mus musculus PE=4 SV=1 - [KV5A6_MOUSE]	P01638	0.421689	0.375008	1.17782	0.23612	0.897808	1.04412	1.04412			Ig kappa chain V-II region VKappa167 OS=Mus musculus GN=Gm5153 PE=4 SV=1 - [KV2A2_MOUSE]	P01627	1	-4.34294e-08	1	0	0	0	0		Ribonuclease 4 OS=Mus musculus GN=Rnase4 PE=1 SV=1 - [RNAS4_MOUSE]	Q9JJH1	1	-4.34294e-08	1	0	0	0	0
Clusterin OS=Mus musculus GN=Clu PE=1 SV=1 - [CLUS_MOUSE]	Q06890	0.371805	0.429685	1.15886	0.212703	0.593573	0.683994	0.683994		Ig heavy chain V region VH558 A1/A4 OS=Mus musculus GN=Gm5629 PE=2 SV=1 - [HVM52_MOUSE]	P06327	0.836864	0.0773449	1.0481	0.0677747	0.44942	0.468285	0.468285		Ig kappa chain V-VI region XRPC 44 OS=Mus musculus PE=1 SV=1 - [KV6A1_MOUSE]	P01675	0.309361	0.509534	1.17782	0.23612	0.428652	0.508429	0.508429			Ig kappa chain V-III region PC 3741/TEPC 111 OS=Mus musculus PE=1 SV=1 - [KV3A8_MOUSE]	P01660	1	-4.34294e-08	1	0	0	0	0		Selenoprotein P OS=Mus musculus GN=Sepp1 PE=1 SV=3 - [SEPP1_MOUSE]	P70274	1	-4.34294e-08	1	0	0	0	0
Ig kappa chain V-V region L6 (Fragment) OS=Mus musculus PE=4 SV=1 - [KV5A6_MOUSE]	P01638	0.489909	0.309885	1.14865	0.199935	0.897808	1.01858	1.01858		Ras-related protein Rap-1A OS=Mus musculus GN=Rap1a PE=1 SV=1 - [RAP1A_MOUSE]	P62835	0.902561	0.0445236	1.0481	0.0677747	0.236082	0.235443	0.235443		Plasma kallikrein OS=Mus musculus GN=Klkb1 PE=1 SV=2 - [KLKB1_MOUSE]	P26262	0.481218	0.317658	1.1722	0.229222	0.0579796	0	0			Ig kappa chain V-III region PC 6684 OS=Mus musculus PE=1 SV=1 - [KV3AI_MOUSE]	P01670	1	-4.34294e-08	1	0	0	0	0		Serum paraoxonase/arylesterase 1 OS=Mus musculus GN=Pon1 PE=1 SV=2 - [PON1_MOUSE]	P52430	1	-4.34294e-08	1	0	0	0	0
Ig heavy chain V region 914 OS=Mus musculus PE=1 SV=1 - [HVM56_MOUSE]	P18527	0.701194	0.154162	1.13687	0.185062	1.32869	1.51584	1.51584		Ig lambda-1 chain C region OS=Mus musculus PE=1 SV=1 - [LAC1_MOUSE]	P01843	0.869008	0.0609762	1.04161	0.0588138	1.07266	1.10576	1.10576		Proteoglycan 4 OS=Mus musculus GN=Prg4 PE=1 SV=2 - [PRG4_MOUSE]	Q9JM99	0.694413	0.158382	1.16667	0.222396	0	0.0149605	0.0149605			Ig kappa chain V-III region PC 7175 OS=Mus musculus PE=1 SV=1 - [KV3AJ_MOUSE]	P01671	1	-4.34294e-08	1	0	0	0	0		T-complex protein 1 subunit alpha OS=Mus musculus GN=Tcp1 PE=1 SV=3 - [TCPA_MOUSE]	P11983	1	-4.34294e-08	1	0	0	0	0
Pregnancy zone protein OS=Mus musculus GN=Pzp PE=1 SV=3 - [PZP_MOUSE]	Q61838	0.671076	0.173228	1.12388	0.168484	0.770768	0.890307	0.890307		Carboxypeptidase N catalytic chain OS=Mus musculus GN=Cpn1 PE=1 SV=1 - [CBPN_MOUSE]	Q9JJN5	0.714766	0.145836	1.02692	0.0383279	0.320435	0.329616	0.329616		Complement C3 OS=Mus musculus GN=C3 PE=1 SV=3 - [CO3_MOUSE]	P01027	0.220313	0.65696	1.15324	0.205693	0.427302	0.494113	0.494113			Ig kappa chain V-III region PC 7940 OS=Mus musculus PE=1 SV=1 - [KV3AK_MOUSE]	P01672	1	-4.34294e-08	1	0	0	0	0		Tetranectin OS=Mus musculus GN=Clec3b PE=1 SV=2 - [TETN_MOUSE]	P43025	1	-4.34294e-08	1	0	0	0	0
Antithrombin-III OS=Mus musculus GN=Serpinc1 PE=1 SV=1 - [ANT3_MOUSE]	P32261	0.42554	0.37106	1.11588	0.158188	1.38769	1.55181	1.55181		Ig kappa chain C region OS=Mus musculus PE=1 SV=1 - [IGKC_MOUSE]	P01837	0.996505	0.00152065	1.00101	0.00145864	6.05532	6.15362	6.15362		Ig heavy chain V region 914 OS=Mus musculus PE=1 SV=1 - [HVM56_MOUSE]	P18527	0.666412	0.176257	1.14367	0.193676	1.32869	1.51595	1.51595			Ig kappa chain V-V region MOPC 21 OS=Mus musculus PE=1 SV=1 - [KV5A2_MOUSE]	P01634	1	-4.34294e-08	1	0	0	0	0		Tubulin beta-5 chain OS=Mus musculus GN=Tubb5 PE=1 SV=1 - [TBB5_MOUSE]	P99024	1	-4.34294e-08	1	0	0	0	0
Serine protease inhibitor A3M OS=Mus musculus GN=Serpina3m PE=1 SV=2 - [SPA3M_MOUSE]	Q03734	0.439276	0.357263	1.10358	0.142197	0.424213	0.465852	0.465852		4F2 cell-surface antigen heavy chain OS=Mus musculus GN=Slc3a2 PE=1 SV=1 - [4F2_MOUSE]	P10852	1	-4.34294e-08	1	0	0	0	0		Ig kappa chain V-V region T1 OS=Mus musculus PE=4 SV=1 - [KV5A5_MOUSE]	P01637	0.937955	0.0278181	1.11041	0.151088	0.113449	0	0			Ig kappa chain V-V region T1 OS=Mus musculus PE=4 SV=1 - [KV5A5_MOUSE]	P01637	1	-4.34294e-08	1	0	0	0	0		Keratin, type II cytoskeletal 2 epidermal OS=Mus musculus GN=Krt2 PE=1 SV=1 - [K22E_MOUSE]	Q3TTY5	0.990761	0.00403131	0.997948	-0.00296342	0.0224964	0	0
Ig kappa chain V-V region HP R16,7 OS=Mus musculus PE=1 SV=1 - [KV5AB_MOUSE]	P01644	0.203787	0.690824	1.09617	0.13247	2.08981	2.28805	2.28805		6-phosphogluconate dehydrogenase, decarboxylating OS=Mus musculus GN=Pgd PE=1 SV=3 - [6PGD_MOUSE]	Q9DCD0	1	-4.34294e-08	1	0	0	0	0		Ig kappa chain V-II region 26-10 OS=Mus musculus PE=1 SV=1 - [KV2A7_MOUSE]	P01631	0.146765	0.833377	1.10489	0.143908	1.35364	1.49656	1.49656			Ig kappa chain V-VI region NQ5-61,1,2 OS=Mus musculus PE=2 SV=1 - [KV6A8_MOUSE]	P04942	1	-4.34294e-08	1	0	0	0	0		Apolipoprotein A-I OS=Mus musculus GN=Apoa1 PE=1 SV=2 - [APOA1_MOUSE]	Q00623	0.990348	0.00421204	0.996022	-0.00575109	1.41461	1.41597	1.41597
Keratin, type II cytoskeletal 2 epidermal OS=Mus musculus GN=Krt2 PE=1 SV=1 - [K22E_MOUSE]	Q3TTY5	0.880959	0.0550442	1.08448	0.117003	0.0238372	0.0224964	0.0224964		Alpha-2-macroglobulin-P OS=Mus musculus GN=A2m PE=2 SV=2 - [A2MG_MOUSE]	Q6GQT1	1	-4.34294e-08	1	0	0	0	0		Keratin, type II cytoskeletal 2 epidermal OS=Mus musculus GN=Krt2 PE=1 SV=1 - [K22E_MOUSE]	Q3TTY5	0.842239	0.0745649	1.08671	0.119967	0.0238372	0	0			Inhibitor of carbonic anhydrase OS=Mus musculus GN=Ica PE=1 SV=1 - [ICA_MOUSE]	Q9DBD0	1	-4.34294e-08	1	0	0	0	0		Ig heavy chain V region 914 OS=Mus musculus PE=1 SV=1 - [HVM56_MOUSE]	P18527	0.990414	0.00418338	0.994047	-0.0086143	1.51584	1.51595	1.51595
Plasma protease C1 inhibitor OS=Mus musculus GN=Serping1 PE=1 SV=3 - [IC1_MOUSE]	P97290	0.538758	0.268606	1.08295	0.114973	0.883025	0.951847	0.951847		Alpha-actinin-1 OS=Mus musculus GN=Actn1 PE=1 SV=1 - [ACTN1_MOUSE]	Q7TPR4	1	-4.34294e-08	1	0	0	0	0		Selenoprotein P OS=Mus musculus GN=Sepp1 PE=1 SV=3 - [SEPP1_MOUSE]	P70274	0.925598	0.0335775	1.07774	0.108015	0.0593687	0	0			Integrin beta-3 OS=Mus musculus GN=Itgb3 PE=1 SV=2 - [ITB3_MOUSE]	O54890	1	-4.34294e-08	1	0	0	0	0		Keratin, type II cytoskeletal 6A OS=Mus musculus GN=Krt6a PE=1 SV=3 - [K2C6A_MOUSE]	P50446	0.990035	0.00434945	0.99036	-0.0139756	0.0806699	0.0438701	0.0438701
Carboxypeptidase N subunit 2 OS=Mus musculus GN=Cpn2 PE=1 SV=2 - [CPN2_MOUSE]	Q9DBB9	0.913256	0.0394077	1.07876	0.109375	0.0539691	0.0395727	0.0395727		Beta-enolase OS=Mus musculus GN=Eno3 PE=1 SV=3 - [ENOB_MOUSE]	P21550	1	-4.34294e-08	1	0	0	0	0		Ig heavy chain V region 441 OS=Mus musculus PE=4 SV=1 - [HVM36_MOUSE]	P01806	0.164521	0.783779	1.0752	0.104603	0.772067	0.830339	0.830339			Keratin, type I cytoskeletal 16 OS=Mus musculus GN=Krt16 PE=1 SV=3 - [K1C16_MOUSE]	Q9Z2K1	1	-4.34294e-08	1	0	0	0	0		Transthyretin OS=Mus musculus GN=Ttr PE=1 SV=1 - [TTHY_MOUSE]	P07309	0.904843	0.0434267	0.989064	-0.0158641	0.725873	0.734533	0.734533
Proteoglycan 4 OS=Mus musculus GN=Prg4 PE=1 SV=2 - [PRG4_MOUSE]	Q9JM99	0.84789	0.0716606	1.07769	0.107947	0	0.0390439	0.0390439		Catalase OS=Mus musculus GN=Cat PE=1 SV=4 - [CATA_MOUSE]	P24270	1	-4.34294e-08	1	0	0	0	0		Ig gamma-1 chain C region secreted form OS=Mus musculus GN=Ighg1 PE=1 SV=1 - [IGHG1_MOUSE]	P01868	0.827407	0.0822808	1.04403	0.0621587	0.604069	0.637975	0.637975			Leukocyte cell-derived chemotaxin-2 OS=Mus musculus GN=Lect2 PE=1 SV=1 - [LECT2_MOUSE]	O88803	1	-4.34294e-08	1	0	0	0	0		Hemoglobin subunit alpha OS=Mus musculus GN=Hba PE=1 SV=2 - [HBA_MOUSE]	P01942	0.936169	0.0286457	0.989064	-0.0158642	0.706222	0.726229	0.726229
Plasma kallikrein OS=Mus musculus GN=Klkb1 PE=1 SV=2 - [KLKB1_MOUSE]	P26262	0.873475	0.0587497	1.07671	0.106627	0.0579796	0	0		CD9 antigen OS=Mus musculus GN=Cd9 PE=1 SV=2 - [CD9_MOUSE]	P40240	1	-4.34294e-08	1	0	0	0	0		Complement C4-B OS=Mus musculus GN=C4b PE=1 SV=3 - [CO4B_MOUSE]	P01029	0.797846	0.0980808	1.02567	0.0365723	0.422123	0.433966	0.433966			L-lactate dehydrogenase A chain OS=Mus musculus GN=Ldha PE=1 SV=3 - [LDHA_MOUSE]	P06151	1	-4.34294e-08	1	0	0	0	0		Actin, cytoplasmic 1 OS=Mus musculus GN=Actb PE=1 SV=1 - [ACTB_MOUSE]	P60710	0.950504	0.0220462	0.98294	-0.0248251	0.416806	0.424923	0.424923
Alpha-2-antiplasmin OS=Mus musculus GN=Serpinf2 PE=1 SV=1 - [A2AP_MOUSE]	Q61247	0.910627	0.0406596	1.07381	0.102736	0.0307547	0.0435372	0.0435372		Ferritin light chain 1 OS=Mus musculus GN=Ftl1 PE=1 SV=2 - [FRIL1_MOUSE]	P29391	1	-4.34294e-08	1	0	0	0	0		4F2 cell-surface antigen heavy chain OS=Mus musculus GN=Slc3a2 PE=1 SV=1 - [4F2_MOUSE]	P10852	1	-4.34294e-08	1	0	0	0	0			Metalloproteinase inhibitor 3 OS=Mus musculus GN=Timp3 PE=1 SV=1 - [TIMP3_MOUSE]	P39876	1	-4.34294e-08	1	0	0	0	0		Plasminogen OS=Mus musculus GN=Plg PE=1 SV=3 - [PLMN_MOUSE]	P20918	0.4614	0.335922	0.978254	-0.0317186	0.404678	0.414091	0.414091
Inter-alpha-trypsin inhibitor heavy chain H3 OS=Mus musculus GN=Itih3 PE=1 SV=3 - [ITIH3_MOUSE]	Q61704	0.610582	0.214256	1.06406	0.0895751	0.033441	0.0160585	0.0160585		Glyceraldehyde-3-phosphate dehydrogenase OS=Mus musculus GN=Gapdh PE=1 SV=2 - [G3P_MOUSE]	P16858	1	-4.34294e-08	1	0	0	0	0		Alpha-2-macroglobulin-P OS=Mus musculus GN=A2m PE=2 SV=2 - [A2MG_MOUSE]	Q6GQT1	1	-4.34294e-08	1	0	0	0	0			Myosin-14 OS=Mus musculus GN=Myh14 PE=1 SV=1 - [MYH14_MOUSE]	Q6URW6	1	-4.34294e-08	1	0	0	0	0		Ig kappa chain V-V region L6 (Fragment) OS=Mus musculus PE=4 SV=1 - [KV5A6_MOUSE]	P01638	0.743839	0.128521	0.97523	-0.0361851	1.01858	1.04412	1.04412
Ig heavy chain V region VH558 A1/A4 OS=Mus musculus GN=Gm5629 PE=2 SV=1 - [HVM52_MOUSE]	P06327	0.853622	0.0687346	1.06344	0.088739	0.44942	0.486066	0.486066		H-2 class I histocompatibility antigen, Q10 alpha chain OS=Mus musculus GN=H2-Q10 PE=1 SV=3 - [HA10_MOUSE]	P01898	1	-4.34294e-08	1	0	0	0	0		Alpha-actinin-1 OS=Mus musculus GN=Actn1 PE=1 SV=1 - [ACTN1_MOUSE]	Q7TPR4	1	-4.34294e-08	1	0	0	0	0			Plasma kallikrein OS=Mus musculus GN=Klkb1 PE=1 SV=2 - [KLKB1_MOUSE]	P26262	1	-4.34294e-08	1	0	0	0	0		Ig kappa chain C region OS=Mus musculus PE=1 SV=1 - [IGKC_MOUSE]	P01837	0.930474	0.0312957	0.97523	-0.0361853	5.84676	5.86944	5.86944
Pyruvate kinase PKM OS=Mus musculus GN=Pkm PE=1 SV=4 - [KPYM_MOUSE]	P52480	0.828207	0.0818613	1.06344	0.0887389	0.258991	0.279376	0.279376		Heat shock 70 kDa protein 1-like OS=Mus musculus GN=Hspa1l PE=1 SV=4 - [HS71L_MOUSE]	P16627	1	-4.34294e-08	1	0	0	0	0		Apolipoprotein A-IV OS=Mus musculus GN=Apoa4 PE=1 SV=3 - [APOA4_MOUSE]	P06728	1	-4.34294e-08	1	0	0	0	0			Platelet factor 4 OS=Mus musculus GN=Pf4 PE=1 SV=1 - [PLF4_MOUSE]	Q9Z126	1	-4.34294e-08	1	0	0	0	0		Alpha-1-antitrypsin 1-3 OS=Mus musculus GN=Serpina1c PE=1 SV=2 - [A1AT3_MOUSE]	Q00896	0.829481	0.0811935	0.970057	-0.0438591	0.530693	0.557441	0.557441
Heat shock cognate 71 kDa protein OS=Mus musculus GN=Hspa8 PE=1 SV=1 - [HSP7C_MOUSE]	P63017	0.806319	0.0934929	1.04887	0.0688325	0.0822509	0.0450261	0.0450261		Heat shock-related 70 kDa protein 2 OS=Mus musculus GN=Hspa2 PE=1 SV=2 - [HSP72_MOUSE]	P17156	1	-4.34294e-08	1	0	0	0	0		Catalase OS=Mus musculus GN=Cat PE=1 SV=4 - [CATA_MOUSE]	P24270	1	-4.34294e-08	1	0	0	0	0			Proteasome subunit alpha type-6 OS=Mus musculus GN=Psma6 PE=1 SV=1 - [PSA6_MOUSE]	Q9QUM9	1	-4.34294e-08	1	0	0	0	0		Complement C1q subcomponent subunit B OS=Mus musculus GN=C1qb PE=1 SV=2 - [C1QB_MOUSE]	P14106	0.668713	0.17476	0.969857	-0.0441559	1.08645	1.12118	1.12118
4F2 cell-surface antigen heavy chain OS=Mus musculus GN=Slc3a2 PE=1 SV=1 - [4F2_MOUSE]	P10852	0.960971	0.0172895	1.04484	0.0632883	0	0.0335231	0.0335231		Ig kappa chain V region Mem5 (Fragment) OS=Mus musculus PE=1 SV=1 - [KVM5_MOUSE]	P84750	1	-4.34294e-08	1	0	0	0	0		CD9 antigen OS=Mus musculus GN=Cd9 PE=1 SV=2 - [CD9_MOUSE]	P40240	1	-4.34294e-08	1	0	0	0	0			Ribonuclease 4 OS=Mus musculus GN=Rnase4 PE=1 SV=1 - [RNAS4_MOUSE]	Q9JJH1	1	-4.34294e-08	1	0	0	0	0		Inter alpha-trypsin inhibitor, heavy chain 4 OS=Mus musculus GN=Itih4 PE=1 SV=2 - [ITIH4_MOUSE]	A6X935	0.111779	0.95164	0.96034	-0.0583822	0.437658	0.455663	0.455663
Insulin-like growth factor-binding protein complex acid labile subunit OS=Mus musculus GN=Igfals PE=1 SV=1 - [ALS_MOUSE]	P70389	0.819697	0.0863465	1.04356	0.0615091	0	0.0530343	0.0530343		Ig kappa chain V-I region S107A OS=Mus musculus GN=Igkv7-33 PE=2 SV=1 - [KV1A1_MOUSE]	P01632	1	-4.34294e-08	1	0	0	0	0		C-type lectin domain family 4 member F OS=Mus musculus GN=Clec4f PE=1 SV=1 - [CLC4F_MOUSE]	P70194	1	-4.34294e-08	1	0	0	0	0			Secreted phosphoprotein 24 OS=Mus musculus GN=Spp2 PE=1 SV=2 - [SPP24_MOUSE]	Q8K1I3	1	-4.34294e-08	1	0	0	0	0		Carboxypeptidase B2 OS=Mus musculus GN=Cpb2 PE=1 SV=1 - [CBPB2_MOUSE]	Q9JHH6	0.725098	0.139603	0.956125	-0.0647295	0.0326484	0	0
6-phosphogluconate dehydrogenase, decarboxylating OS=Mus musculus GN=Pgd PE=1 SV=3 - [6PGD_MOUSE]	Q9DCD0	1	-4.34294e-08	1	0	0	0	0		Ig kappa chain V-II region VKappa167 OS=Mus musculus GN=Gm5153 PE=4 SV=1 - [KV2A2_MOUSE]	P01627	1	-4.34294e-08	1	0	0	0	0		Erythrocyte band 7 integral membrane protein OS=Mus musculus GN=Stom PE=1 SV=3 - [STOM_MOUSE]	P54116	1	-4.34294e-08	1	0	0	0	0			Selenoprotein P OS=Mus musculus GN=Sepp1 PE=1 SV=3 - [SEPP1_MOUSE]	P70274	1	-4.34294e-08	1	0	0	0	0		Ig heavy chain V region MOPC 104E OS=Mus musculus PE=1 SV=1 - [HVM12_MOUSE]	P01756	0.598428	0.222988	0.943831	-0.0833992	0.614458	0.601481	0.601481
Alpha-2-macroglobulin-P OS=Mus musculus GN=A2m PE=2 SV=2 - [A2MG_MOUSE]	Q6GQT1	1	-4.34294e-08	1	0	0	0	0		Ig kappa chain V-III region PC 6684 OS=Mus musculus PE=1 SV=1 - [KV3AI_MOUSE]	P01670	1	-4.34294e-08	1	0	0	0	0		Ferritin light chain 1 OS=Mus musculus GN=Ftl1 PE=1 SV=2 - [FRIL1_MOUSE]	P29391	1	-4.34294e-08	1	0	0	0	0			T-complex protein 1 subunit alpha OS=Mus musculus GN=Tcp1 PE=1 SV=3 - [TCPA_MOUSE]	P11983	1	-4.34294e-08	1	0	0	0	0		Ig kappa chain V-III region 50S10,1 OS=Mus musculus PE=1 SV=1 - [KV3A4_MOUSE]	P03977	0.988829	0.00487897	0.941992	-0.0862136	0.397482	0.641045	0.641045
Beta-enolase OS=Mus musculus GN=Eno3 PE=1 SV=3 - [ENOB_MOUSE]	P21550	1	-4.34294e-08	1	0	0	0	0		Ig kappa chain V-V region MOPC 21 OS=Mus musculus PE=1 SV=1 - [KV5A2_MOUSE]	P01634	1	-4.34294e-08	1	0	0	0	0		Glyceraldehyde-3-phosphate dehydrogenase OS=Mus musculus GN=Gapdh PE=1 SV=2 - [G3P_MOUSE]	P16858	1	-4.34294e-08	1	0	0	0	0			Transforming growth factor-beta-induced protein ig-h3 OS=Mus musculus GN=Tgfbi PE=1 SV=1 - [BGH3_MOUSE]	P82198	1	-4.34294e-08	1	0	0	0	0		Antithrombin-III OS=Mus musculus GN=Serpinc1 PE=1 SV=1 - [ANT3_MOUSE]	P32261	0.722883	0.140932	0.936519	-0.0946203	1.55181	1.65228	1.65228
Ezrin OS=Mus musculus GN=Ezr PE=1 SV=3 - [EZRI_MOUSE]	P26040	1	-4.34294e-08	1	0	0	0	0		Ig kappa chain V-VI region NQ2-17,4,1 OS=Mus musculus PE=2 SV=1 - [KV6A6_MOUSE]	P04940	1	-4.34294e-08	1	0	0	0	0		H-2 class I histocompatibility antigen, Q10 alpha chain OS=Mus musculus GN=H2-Q10 PE=1 SV=3 - [HA10_MOUSE]	P01898	1	-4.34294e-08	1	0	0	0	0			Tubulin beta-5 chain OS=Mus musculus GN=Tubb5 PE=1 SV=1 - [TBB5_MOUSE]	P99024	1	-4.34294e-08	1	0	0	0	0		Ig gamma-2A chain C region secreted form OS=Mus musculus PE=1 SV=1 - [GCAB_MOUSE]	P01864	0.646321	0.189552	0.934858	-0.0971804	1.67637	1.82631	1.82631
Glyceraldehyde-3-phosphate dehydrogenase OS=Mus musculus GN=Gapdh PE=1 SV=2 - [G3P_MOUSE]	P16858	1	-4.34294e-08	1	0	0	0	0		Ig lambda-1 chain V region OS=Mus musculus PE=1 SV=2 - [LV1A_MOUSE]	P01723	1	-4.34294e-08	1	0	0	0	0		Heat shock 70 kDa protein 1-like OS=Mus musculus GN=Hspa1l PE=1 SV=4 - [HS71L_MOUSE]	P16627	1	-4.34294e-08	1	0	0	0	0			Vitamin D-binding protein OS=Mus musculus GN=Gc PE=1 SV=2 - [VTDB_MOUSE]	P21614	1	-4.34294e-08	1	0	0	0	0		Complement C1q subcomponent subunit C OS=Mus musculus GN=C1qc PE=1 SV=2 - [C1QC_MOUSE]	Q02105	0.636269	0.196359	0.928605	-0.106863	1.04849	1.13722	1.13722
Heat shock 70 kDa protein 1-like OS=Mus musculus GN=Hspa1l PE=1 SV=4 - [HS71L_MOUSE]	P16627	1	-4.34294e-08	1	0	0	0	0		Inhibitor of carbonic anhydrase OS=Mus musculus GN=Ica PE=1 SV=1 - [ICA_MOUSE]	Q9DBD0	1	-4.34294e-08	1	0	0	0	0		Ig kappa chain V-I region S107A OS=Mus musculus GN=Igkv7-33 PE=2 SV=1 - [KV1A1_MOUSE]	P01632	1	-4.34294e-08	1	0	0	0	0			Ig heavy chain V region 102 OS=Mus musculus PE=1 SV=1 - [HVM06_MOUSE]	P01750	0.991128	0.00387045	0.996354	-0.00526948	0.828009	0.837402	0.837402		Ig heavy chain V region 186-1 OS=Mus musculus PE=4 SV=2 - [HVM09_MOUSE]	P01753	0.835351	0.0781309	0.925184	-0.112187	0.902393	0.966342	0.966342
Hypoxia up-regulated protein 1 OS=Mus musculus GN=Hyou1 PE=1 SV=1 - [HYOU1_MOUSE]	Q9JKR6	1	-4.34294e-08	1	0	0	0	0		Integrin beta-3 OS=Mus musculus GN=Itgb3 PE=1 SV=2 - [ITB3_MOUSE]	O54890	1	-4.34294e-08	1	0	0	0	0		Ig kappa chain V-II region VKappa167 OS=Mus musculus GN=Gm5153 PE=4 SV=1 - [KV2A2_MOUSE]	P01627	1	-4.34294e-08	1	0	0	0	0			Ig heavy chain V region MOPC 47A OS=Mus musculus PE=1 SV=1 - [HVM17_MOUSE]	P01786	0.91322	0.0394247	0.982418	-0.0255905	0.759594	0.798768	0.798768		Proteoglycan 4 OS=Mus musculus GN=Prg4 PE=1 SV=2 - [PRG4_MOUSE]	Q9JM99	0.0375465	1.42543	0.923735	-0.114449	0.0390439	0.0149605	0.0149605
Ig heavy chain V-III region A4 OS=Mus musculus PE=1 SV=1 - [HVM27_MOUSE]	P01796	1	-4.34294e-08	1	0	0	0	0		Keratin, type I cytoskeletal 14 OS=Mus musculus GN=Krt14 PE=1 SV=2 - [K1C14_MOUSE]	Q61781	1	-4.34294e-08	1	0	0	0	0		Ig kappa chain V-V region MOPC 21 OS=Mus musculus PE=1 SV=1 - [KV5A2_MOUSE]	P01634	1	-4.34294e-08	1	0	0	0	0			Inter-alpha-trypsin inhibitor heavy chain H3 OS=Mus musculus GN=Itih3 PE=1 SV=3 - [ITIH3_MOUSE]	Q61704	0.965425	0.0152816	0.981668	-0.0266931	0.0160585	0	0		Histidine-rich glycoprotein OS=Mus musculus GN=Hrg PE=1 SV=2 - [HRG_MOUSE]	Q9ESB3	0.566318	0.24694	0.923279	-0.115161	2.21306	2.40876	2.40876
Ig kappa chain V-I region S107A OS=Mus musculus GN=Igkv7-33 PE=2 SV=1 - [KV1A1_MOUSE]	P01632	1	-4.34294e-08	1	0	0	0	0		Keratin, type I cytoskeletal 16 OS=Mus musculus GN=Krt16 PE=1 SV=3 - [K1C16_MOUSE]	Q9Z2K1	1	-4.34294e-08	1	0	0	0	0		Ig kappa chain V-VI region NQ2-17,4,1 OS=Mus musculus PE=2 SV=1 - [KV6A6_MOUSE]	P04940	1	-4.34294e-08	1	0	0	0	0			Keratin, type II cytoskeletal 6A OS=Mus musculus GN=Krt6a PE=1 SV=3 - [K2C6A_MOUSE]	P50446	0.976786	0.0102004	0.978221	-0.0317674	0.0806699	0.102365	0.102365		Heparin cofactor 2 OS=Mus musculus GN=Serpind1 PE=1 SV=1 - [HEP2_MOUSE]	P49182	0.91698	0.0376402	0.919218	-0.121521	0.0538285	0.0318441	0.0318441
Ig kappa chain V-II region VKappa167 OS=Mus musculus GN=Gm5153 PE=4 SV=1 - [KV2A2_MOUSE]	P01627	1	-4.34294e-08	1	0	0	0	0		Keratin, type I cytoskeletal 17 OS=Mus musculus GN=Krt17 PE=1 SV=3 - [K1C17_MOUSE]	Q9QWL7	1	-4.34294e-08	1	0	0	0	0		Ig lambda-1 chain V region OS=Mus musculus PE=1 SV=2 - [LV1A_MOUSE]	P01723	1	-4.34294e-08	1	0	0	0	0			Murinoglobulin-1 OS=Mus musculus GN=Mug1 PE=1 SV=3 - [MUG1_MOUSE]	P28665	0.839741	0.0758549	0.970364	-0.0434024	0.377372	0.378844	0.378844		Ig gamma-2B chain C region OS=Mus musculus GN=Igh-3 PE=1 SV=3 - [IGG2B_MOUSE]	P01867	0.298688	0.524782	0.910572	-0.135155	0.615729	0.676812	0.676812
Ig kappa chain V-III region PC 6684 OS=Mus musculus PE=1 SV=1 - [KV3AI_MOUSE]	P01670	1	-4.34294e-08	1	0	0	0	0		Keratin, type I cytoskeletal 42 OS=Mus musculus GN=Krt42 PE=1 SV=1 - [K1C42_MOUSE]	Q6IFX2	1	-4.34294e-08	1	0	0	0	0		Inhibitor of carbonic anhydrase OS=Mus musculus GN=Ica PE=1 SV=1 - [ICA_MOUSE]	Q9DBD0	1	-4.34294e-08	1	0	0	0	0			Heat shock-related 70 kDa protein 2 OS=Mus musculus GN=Hspa2 PE=1 SV=2 - [HSP72_MOUSE]	P17156	0.972697	0.0120223	0.966949	-0.0484879	0.0842432	0	0		Glucose-6-phosphate isomerase OS=Mus musculus GN=Gpi PE=1 SV=4 - [G6PI_MOUSE]	P06745	0.111895	0.95119	0.902888	-0.147381	0.0565774	0.0627883	0.0627883
Ig kappa chain V-V region MOPC 21 OS=Mus musculus PE=1 SV=1 - [KV5A2_MOUSE]	P01634	1	-4.34294e-08	1	0	0	0	0		Keratin, type II cytoskeletal 5 OS=Mus musculus GN=Krt5 PE=1 SV=1 - [K2C5_MOUSE]	Q922U2	1	-4.34294e-08	1	0	0	0	0		Integrin beta-3 OS=Mus musculus GN=Itgb3 PE=1 SV=2 - [ITB3_MOUSE]	O54890	1	-4.34294e-08	1	0	0	0	0			Complement C1s-A subcomponent OS=Mus musculus GN=C1sa PE=2 SV=2 - [CS1A_MOUSE]	Q8CG14	0.785503	0.104852	0.96257	-0.0550373	0.95626	0.994782	0.994782		Ig heavy chain V region MOPC 21 (Fragment) OS=Mus musculus PE=1 SV=1 - [HVM16_MOUSE]	P01783	0.904378	0.04365	0.902888	-0.147381	0.548091	0.56497	0.56497
Inhibitor of carbonic anhydrase OS=Mus musculus GN=Ica PE=1 SV=1 - [ICA_MOUSE]	Q9DBD0	1	-4.34294e-08	1	0	0	0	0		Keratin, type II cytoskeletal 79 OS=Mus musculus GN=Krt79 PE=1 SV=2 - [K2C79_MOUSE]	Q8VED5	1	-4.34294e-08	1	0	0	0	0		Keratin, type I cytoskeletal 14 OS=Mus musculus GN=Krt14 PE=1 SV=2 - [K1C14_MOUSE]	Q61781	1	-4.34294e-08	1	0	0	0	0			Ig heavy chain V region 186-1 OS=Mus musculus PE=4 SV=2 - [HVM09_MOUSE]	P01753	0.89426	0.0485361	0.96257	-0.0550373	0.902393	0.923787	0.923787		Integrin alpha-IIb OS=Mus musculus GN=Itga2b PE=1 SV=2 - [ITA2B_MOUSE]	Q9QUM0	0.705687	0.151388	0.902888	-0.147381	0.0717102	0.0776524	0.0776524
Integrin beta-3 OS=Mus musculus GN=Itgb3 PE=1 SV=2 - [ITB3_MOUSE]	O54890	1	-4.34294e-08	1	0	0	0	0		Kinesin-1 heavy chain OS=Mus musculus GN=Kif5b PE=1 SV=3 - [KINH_MOUSE]	Q61768	1	-4.34294e-08	1	0	0	0	0		Keratin, type I cytoskeletal 15 OS=Mus musculus GN=Krt15 PE=1 SV=2 - [K1C15_MOUSE]	Q61414	1	-4.34294e-08	1	0	0	0	0			Ig heavy chain V region 3-6 OS=Mus musculus GN=Ighv3-6 PE=1 SV=1 - [HVM60_MOUSE]	P18531	0.89426	0.0485362	0.962569	-0.0550374	0.88824	0.909299	0.909299		Keratin, type II cytoskeletal 1 OS=Mus musculus GN=Krt1 PE=1 SV=4 - [K2C1_MOUSE]	P04104	0.111894	0.951194	0.902888	-0.147381	0.0933525	0.103331	0.103331
Keratin, type I cytoskeletal 13 OS=Mus musculus GN=Krt13 PE=1 SV=2 - [K1C13_MOUSE]	P08730	1	-4.34294e-08	1	0	0	0	0		Leukocyte cell-derived chemotaxin-2 OS=Mus musculus GN=Lect2 PE=1 SV=1 - [LECT2_MOUSE]	O88803	1	-4.34294e-08	1	0	0	0	0		Keratin, type I cytoskeletal 17 OS=Mus musculus GN=Krt17 PE=1 SV=3 - [K1C17_MOUSE]	Q9QWL7	1	-4.34294e-08	1	0	0	0	0			Apolipoprotein A-I OS=Mus musculus GN=Apoa1 PE=1 SV=2 - [APOA1_MOUSE]	Q00623	0.762514	0.117752	0.959479	-0.0596762	1.41461	1.46041	1.46041		Ezrin OS=Mus musculus GN=Ezr PE=1 SV=3 - [EZRI_MOUSE]	P26040	0.611473	0.213623	0.900825	-0.150682	0	0.0635562	0.0635562
Keratin, type I cytoskeletal 16 OS=Mus musculus GN=Krt16 PE=1 SV=3 - [K1C16_MOUSE]	Q9Z2K1	1	-4.34294e-08	1	0	0	0	0		L-lactate dehydrogenase A chain OS=Mus musculus GN=Ldha PE=1 SV=3 - [LDHA_MOUSE]	P06151	1	-4.34294e-08	1	0	0	0	0		Keratin, type I cytoskeletal 42 OS=Mus musculus GN=Krt42 PE=1 SV=1 - [K1C42_MOUSE]	Q6IFX2	1	-4.34294e-08	1	0	0	0	0			Ig kappa chain V-V region MOPC 41 OS=Mus musculus GN=Gm5571 PE=1 SV=1 - [KV5A7_MOUSE]	P01639	0.842837	0.0742564	0.950461	-0.0733003	1.33962	1.41475	1.41475		Complement C1q subcomponent subunit A OS=Mus musculus GN=C1qa PE=1 SV=2 - [C1QA_MOUSE]	P98086	0.587308	0.231134	0.899681	-0.152515	2.28261	2.58904	2.58904
Leukocyte cell-derived chemotaxin-2 OS=Mus musculus GN=Lect2 PE=1 SV=1 - [LECT2_MOUSE]	O88803	1	-4.34294e-08	1	0	0	0	0		Phosphatidylinositol-glycan-specific phospholipase D OS=Mus musculus GN=Gpld1 PE=1 SV=1 - [PHLD_MOUSE]	O70362	1	-4.34294e-08	1	0	0	0	0		Keratin, type II cytoskeletal 5 OS=Mus musculus GN=Krt5 PE=1 SV=1 - [K2C5_MOUSE]	Q922U2	1	-4.34294e-08	1	0	0	0	0			Complement component C8 alpha chain OS=Mus musculus GN=C8a PE=1 SV=1 - [CO8A_MOUSE]	Q8K182	0.933771	0.0297595	0.949106	-0.0753584	0.143702	0.156843	0.156843		4F2 cell-surface antigen heavy chain OS=Mus musculus GN=Slc3a2 PE=1 SV=1 - [4F2_MOUSE]	P10852	0.841545	0.0749225	0.899536	-0.152747	0.0335231	0	0
L-lactate dehydrogenase A chain OS=Mus musculus GN=Ldha PE=1 SV=3 - [LDHA_MOUSE]	P06151	1	-4.34294e-08	1	0	0	0	0		Profilin-1 OS=Mus musculus GN=Pfn1 PE=1 SV=2 - [PROF1_MOUSE]	P62962	1	-4.34294e-08	1	0	0	0	0		Keratin, type II cytoskeletal 79 OS=Mus musculus GN=Krt79 PE=1 SV=2 - [K2C79_MOUSE]	Q8VED5	1	-4.34294e-08	1	0	0	0	0			Ig kappa chain C region OS=Mus musculus PE=1 SV=1 - [IGKC_MOUSE]	P01837	0.913114	0.0394752	0.946833	-0.0788181	5.84676	6.15362	6.15362		Mannose-binding protein A OS=Mus musculus GN=Mbl1 PE=1 SV=1 - [MBL1_MOUSE]	P39039	0.641183	0.193018	0.898954	-0.153681	1.28991	1.43721	1.43721
Peptidyl-prolyl cis-trans isomerase A OS=Mus musculus GN=Ppia PE=1 SV=2 - [PPIA_MOUSE]	P17742	1	-4.34294e-08	1	0	0	0	0		Proteasome subunit alpha type-1 OS=Mus musculus GN=Psma1 PE=1 SV=1 - [PSA1_MOUSE]	Q9R1P4	1	-4.34294e-08	1	0	0	0	0		Kinesin-1 heavy chain OS=Mus musculus GN=Kif5b PE=1 SV=3 - [KINH_MOUSE]	Q61768	1	-4.34294e-08	1	0	0	0	0			Ig heavy chain V region 6,96 OS=Mus musculus PE=4 SV=1 - [HVM57_MOUSE]	P18528	0.986896	0.00572846	0.941155	-0.0874953	0.621839	0.486186	0.486186		Carboxypeptidase N subunit 2 OS=Mus musculus GN=Cpn2 PE=1 SV=2 - [CPN2_MOUSE]	Q9DBB9	0.917044	0.03761	0.889996	-0.168129	0.0395727	0.0729389	0.0729389
Proteasome subunit alpha type-6 OS=Mus musculus GN=Psma6 PE=1 SV=1 - [PSA6_MOUSE]	Q9QUM9	1	-4.34294e-08	1	0	0	0	0		Proteasome subunit alpha type-5 OS=Mus musculus GN=Psma5 PE=1 SV=1 - [PSA5_MOUSE]	Q9Z2U1	1	-4.34294e-08	1	0	0	0	0		Leukocyte cell-derived chemotaxin-2 OS=Mus musculus GN=Lect2 PE=1 SV=1 - [LECT2_MOUSE]	O88803	1	-4.34294e-08	1	0	0	0	0			Ig kappa chain V-II region 26-10 OS=Mus musculus PE=1 SV=1 - [KV2A7_MOUSE]	P01631	0.423194	0.373461	0.939372	-0.0902321	1.2224	1.30013	1.30013		Complement C1s-A subcomponent OS=Mus musculus GN=C1sa PE=2 SV=2 - [CS1A_MOUSE]	Q8CG14	0.138941	0.857171	0.888355	-0.170792	0.95626	1.078	1.078
Protein S100-A9 OS=Mus musculus GN=S100a9 PE=1 SV=3 - [S10A9_MOUSE]	P31725	1	-4.34294e-08	1	0	0	0	0		Proteasome subunit alpha type-6 OS=Mus musculus GN=Psma6 PE=1 SV=1 - [PSA6_MOUSE]	Q9QUM9	1	-4.34294e-08	1	0	0	0	0		L-lactate dehydrogenase A chain OS=Mus musculus GN=Ldha PE=1 SV=3 - [LDHA_MOUSE]	P06151	1	-4.34294e-08	1	0	0	0	0			Matrix metalloproteinase-19 OS=Mus musculus GN=Mmp19 PE=2 SV=1 - [MMP19_MOUSE]	Q9JHI0	0.875254	0.0578661	0.938008	-0.0923281	0.0496171	0.0684907	0.0684907		Complement component C8 beta chain OS=Mus musculus GN=C8b PE=1 SV=1 - [CO8B_MOUSE]	Q8BH35	0.736984	0.132542	0.870044	-0.200839	0.230418	0.247579	0.247579
Secreted phosphoprotein 24 OS=Mus musculus GN=Spp2 PE=1 SV=2 - [SPP24_MOUSE]	Q8K1I3	1	-4.34294e-08	1	0	0	0	0		Proteasome subunit alpha type-7 OS=Mus musculus GN=Psma7 PE=1 SV=1 - [PSA7_MOUSE]	Q9Z2U0	1	-4.34294e-08	1	0	0	0	0		Multimerin-1 OS=Mus musculus GN=Mmrn1 PE=1 SV=2 - [MMRN1_MOUSE]	B2RPV6	1	-4.34294e-08	1	0	0	0	0			Thrombospondin-1 OS=Mus musculus GN=Thbs1 PE=1 SV=1 - [TSP1_MOUSE]	P35441	0.813952	0.089401	0.937167	-0.0936213	0.132791	0.138694	0.138694		Vitronectin OS=Mus musculus GN=Vtn PE=1 SV=2 - [VTNC_MOUSE]	P29788	0.350633	0.455147	0.865251	-0.20881	0.969305	1.11667	1.11667
Serum paraoxonase/arylesterase 1 OS=Mus musculus GN=Pon1 PE=1 SV=2 - [PON1_MOUSE]	P52430	1	-4.34294e-08	1	0	0	0	0		Proteasome subunit beta type-10 OS=Mus musculus GN=Psmb10 PE=1 SV=1 - [PSB10_MOUSE]	O35955	1	-4.34294e-08	1	0	0	0	0		Peptidyl-prolyl cis-trans isomerase A OS=Mus musculus GN=Ppia PE=1 SV=2 - [PPIA_MOUSE]	P17742	1	-4.34294e-08	1	0	0	0	0			Apolipoprotein E OS=Mus musculus GN=Apoe PE=1 SV=2 - [APOE_MOUSE]	P08226	0.79757	0.0982313	0.933331	-0.0995399	0.571816	0.607511	0.607511		Pyruvate kinase PKM OS=Mus musculus GN=Pkm PE=1 SV=4 - [KPYM_MOUSE]	P52480	0.65927	0.180937	0.86087	-0.216133	0.279376	0.317527	0.317527
T-complex protein 1 subunit alpha OS=Mus musculus GN=Tcp1 PE=1 SV=3 - [TCPA_MOUSE]	P11983	1	-4.34294e-08	1	0	0	0	0		Proteasome subunit beta type-2 OS=Mus musculus GN=Psmb2 PE=1 SV=1 - [PSB2_MOUSE]	Q9R1P3	1	-4.34294e-08	1	0	0	0	0		Profilin-1 OS=Mus musculus GN=Pfn1 PE=1 SV=2 - [PROF1_MOUSE]	P62962	1	-4.34294e-08	1	0	0	0	0			Complement C1q subcomponent subunit B OS=Mus musculus GN=C1qb PE=1 SV=2 - [C1QB_MOUSE]	P14106	0.526912	0.278262	0.932004	-0.101592	1.08645	1.17009	1.17009		Proteasome subunit beta type-2 OS=Mus musculus GN=Psmb2 PE=1 SV=1 - [PSB2_MOUSE]	Q9R1P3	0.939257	0.0272155	0.856647	-0.223228	0.139311	0.09629	0.09629
Tetranectin OS=Mus musculus GN=Clec3b PE=1 SV=2 - [TETN_MOUSE]	P43025	1	-4.34294e-08	1	0	0	0	0		Proteasome subunit beta type-3 OS=Mus musculus GN=Psmb3 PE=1 SV=1 - [PSB3_MOUSE]	Q9R1P1	1	-4.34294e-08	1	0	0	0	0		Proteasome subunit alpha type-1 OS=Mus musculus GN=Psma1 PE=1 SV=1 - [PSA1_MOUSE]	Q9R1P4	1	-4.34294e-08	1	0	0	0	0			Hemoglobin subunit beta-1 OS=Mus musculus GN=Hbb-b1 PE=1 SV=2 - [HBB1_MOUSE]	P02088	0.756042	0.121454	0.932004	-0.101592	0.908122	0.951033	0.951033		Complement C1r-A subcomponent OS=Mus musculus GN=C1ra PE=1 SV=1 - [C1RA_MOUSE]	Q8CG16	0.316137	0.500124	0.851251	-0.232344	0.547627	0.64683	0.64683
Transforming growth factor-beta-induced protein ig-h3 OS=Mus musculus GN=Tgfbi PE=1 SV=1 - [BGH3_MOUSE]	P82198	1	-4.34294e-08	1	0	0	0	0		Proteasome subunit beta type-4 OS=Mus musculus GN=Psmb4 PE=1 SV=1 - [PSB4_MOUSE]	P99026	1	-4.34294e-08	1	0	0	0	0		Proteasome subunit alpha type-6 OS=Mus musculus GN=Psma6 PE=1 SV=1 - [PSA6_MOUSE]	Q9QUM9	1	-4.34294e-08	1	0	0	0	0			Alpha-1-antitrypsin 1-3 OS=Mus musculus GN=Serpina1c PE=1 SV=2 - [A1AT3_MOUSE]	Q00896	0.715954	0.145115	0.92706	-0.109266	0.530693	0.569136	0.569136		Ceruloplasmin OS=Mus musculus GN=Cp PE=1 SV=2 - [CERU_MOUSE]	Q61147	0.362073	0.441204	0.850034	-0.234408	0.0652092	0.0429726	0.0429726
Tubulin beta-4B chain OS=Mus musculus GN=Tubb4b PE=1 SV=1 - [TBB4B_MOUSE]	P68372	0.964982	0.0154807	0.984554	-0.0224572	0.18425	0.17455	0.18425		Proteasome subunit beta type-9 OS=Mus musculus bactrianus GN=Psmb9 PE=1 SV=1 - [PSB9_MUSMB]	O35522	1	-4.34294e-08	1	0	0	0	0		Proteasome subunit alpha type-7 OS=Mus musculus GN=Psma7 PE=1 SV=1 - [PSA7_MOUSE]	Q9Z2U0	1	-4.34294e-08	1	0	0	0	0			Alpha-2-antiplasmin OS=Mus musculus GN=Serpinf2 PE=1 SV=1 - [A2AP_MOUSE]	Q61247	0.950746	0.0219357	0.926885	-0.109537	0.0435372	0	0		Coagulation factor V OS=Mus musculus GN=F5 PE=1 SV=1 - [FA5_MOUSE]	O88783	0.524307	0.280414	0.84656	-0.240315	0.127817	0.1537	0.1537
Ig heavy chain V region AC38 205,12 OS=Mus musculus PE=1 SV=1 - [HVM51_MOUSE]	P06330	0.827269	0.082353	0.976832	-0.0338174	2.30743	2.24419	2.30743		Secreted phosphoprotein 24 OS=Mus musculus GN=Spp2 PE=1 SV=2 - [SPP24_MOUSE]	Q8K1I3	1	-4.34294e-08	1	0	0	0	0		Proteasome subunit beta type-10 OS=Mus musculus GN=Psmb10 PE=1 SV=1 - [PSB10_MOUSE]	O35955	1	-4.34294e-08	1	0	0	0	0			Complement C1q subcomponent subunit A OS=Mus musculus GN=C1qa PE=1 SV=2 - [C1QA_MOUSE]	P98086	0.34552	0.461527	0.91852	-0.122617	2.28261	2.49811	2.49811		Alpha-2-antiplasmin OS=Mus musculus GN=Serpinf2 PE=1 SV=1 - [A2AP_MOUSE]	Q61247	0.849364	0.0709064	0.845273	-0.24251	0.0435372	0	0
Ig heavy chain V region J539 OS=Mus musculus PE=1 SV=1 - [HVM40_MOUSE]	P01810	0.835251	0.0781829	0.970784	-0.0427782	0.689023	0.670545	0.689023		T-complex protein 1 subunit alpha OS=Mus musculus GN=Tcp1 PE=1 SV=3 - [TCPA_MOUSE]	P11983	1	-4.34294e-08	1	0	0	0	0		Proteasome subunit beta type-9 OS=Mus musculus bactrianus GN=Psmb9 PE=1 SV=1 - [PSB9_MUSMB]	O35522	1	-4.34294e-08	1	0	0	0	0			Transferrin receptor protein 1 OS=Mus musculus GN=Tfrc PE=1 SV=1 - [TFR1_MOUSE]	Q62351	0.833051	0.0793283	0.909543	-0.136787	0.310667	0.350604	0.350604		Ig kappa chain V-III region PC 2880/PC 1229 OS=Mus musculus PE=1 SV=1 - [KV3A1_MOUSE]	P01654	0.495222	0.3052	0.844574	-0.243704	1.2007	1.38825	1.38825
Mannan-binding lectin serine protease 2 OS=Mus musculus GN=Masp2 PE=1 SV=1 - [MASP2_MOUSE]	Q91WP0	0.835251	0.0781831	0.970784	-0.0427783	0.120804	0.117565	0.120804		Transforming growth factor-beta-induced protein ig-h3 OS=Mus musculus GN=Tgfbi PE=1 SV=1 - [BGH3_MOUSE]	P82198	1	-4.34294e-08	1	0	0	0	0		Protein S100-A9 OS=Mus musculus GN=S100a9 PE=1 SV=3 - [S10A9_MOUSE]	P31725	1	-4.34294e-08	1	0	0	0	0			Antithrombin-III OS=Mus musculus GN=Serpinc1 PE=1 SV=1 - [ANT3_MOUSE]	P32261	0.56505	0.247913	0.908134	-0.139023	1.55181	1.70243	1.70243		Matrix metalloproteinase-19 OS=Mus musculus GN=Mmp19 PE=2 SV=1 - [MMP19_MOUSE]	Q9JHI0	0.7602	0.119072	0.829757	-0.26924	0.0496171	0.0373066	0.0373066
Ig kappa chain C region OS=Mus musculus PE=1 SV=1 - [IGKC_MOUSE]	P01837	0.830986	0.0804062	0.947791	-0.0773594	6.05532	5.84676	6.05532		Tubulin alpha-3 chain OS=Mus musculus GN=Tuba3a PE=1 SV=1 - [TBA3_MOUSE]	P05214	1	-4.34294e-08	1	0	0	0	0		Serum paraoxonase/arylesterase 1 OS=Mus musculus GN=Pon1 PE=1 SV=2 - [PON1_MOUSE]	P52430	1	-4.34294e-08	1	0	0	0	0			Inter-alpha-trypsin inhibitor heavy chain H2 OS=Mus musculus GN=Itih2 PE=1 SV=1 - [ITIH2_MOUSE]	Q61703	0.782692	0.106409	0.907519	-0.14	0.0971738	0.103987	0.103987		Ig kappa chain V19-17 OS=Mus musculus GN=Igk-V19-17 PE=1 SV=1 - [KV5A1_MOUSE]	P01633	0.664237	0.177677	0.823596	-0.279992	0.24273	0.211203	0.211203
Mannan-binding lectin serine protease 1 OS=Mus musculus GN=Masp1 PE=1 SV=2 - [MASP1_MOUSE]	P98064	0.357375	0.446876	0.937866	-0.0925462	0.176405	0.165405	0.176405		Xanthine dehydrogenase/oxidase OS=Mus musculus GN=Xdh PE=1 SV=5 - [XDH_MOUSE]	Q00519	1	-4.34294e-08	1	0	0	0	0		T-complex protein 1 subunit alpha OS=Mus musculus GN=Tcp1 PE=1 SV=3 - [TCPA_MOUSE]	P11983	1	-4.34294e-08	1	0	0	0	0			Catalase OS=Mus musculus GN=Cat PE=1 SV=4 - [CATA_MOUSE]	P24270	0.798172	0.0979033	0.90711	-0.14065	0.0327055	0	0		Ig heavy chain V region 36-65 OS=Mus musculus PE=1 SV=1 - [HVM03_MOUSE]	P01747	0.95533	0.0198466	0.821274	-0.284065	0.367413	0.260826	0.260826
Filamin-A OS=Mus musculus GN=Flna PE=1 SV=5 - [FLNA_MOUSE]	Q8BTM8	0.484333	0.314856	0.920128	-0.120094	0	0.0681715	0		Plasminogen OS=Mus musculus GN=Plg PE=1 SV=3 - [PLMN_MOUSE]	P20918	0.979285	0.00909082	0.990993	-0.0130539	0.512589	0.530893	0.512589		Tetranectin OS=Mus musculus GN=Clec3b PE=1 SV=2 - [TETN_MOUSE]	P43025	1	-4.34294e-08	1	0	0	0	0			Mannose-binding protein A OS=Mus musculus GN=Mbl1 PE=1 SV=1 - [MBL1_MOUSE]	P39039	0.412502	0.384574	0.886513	-0.173787	1.28991	1.45119	1.45119		Tubulin alpha-3 chain OS=Mus musculus GN=Tuba3a PE=1 SV=1 - [TBA3_MOUSE]	P05214	0.703876	0.152504	0.819734	-0.286773	0.0479055	0.0868403	0.0868403
Apolipoprotein E OS=Mus musculus GN=Apoe PE=1 SV=2 - [APOE_MOUSE]	P08226	0.568634	0.245167	0.905658	-0.142961	0.624897	0.571816	0.624897		Lactotransferrin OS=Mus musculus GN=Ltf PE=1 SV=4 - [TRFL_MOUSE]	P08071	0.974466	0.0112331	0.988157	-0.0171878	0.095481	0.0894932	0.095481		Xanthine dehydrogenase/oxidase OS=Mus musculus GN=Xdh PE=1 SV=5 - [XDH_MOUSE]	Q00519	1	-4.34294e-08	1	0	0	0	0			Alpha-enolase OS=Mus musculus GN=Eno1 PE=1 SV=3 - [ENOA_MOUSE]	P17182	0.08683	1.06133	0.878702	-0.186554	0.0960736	0.109926	0.109926		Coagulation factor XI OS=Mus musculus GN=F11 PE=2 SV=2 - [FA11_MOUSE]	Q91Y47	0.335561	0.474228	0.817909	-0.289988	0.022863	0.0248668	0.0248668
Ig kappa chain V-II region 26-10 OS=Mus musculus PE=1 SV=1 - [KV2A7_MOUSE]	P01631	0.156969	0.804187	0.902359	-0.148227	1.35364	1.2224	1.35364		Complement C3 OS=Mus musculus GN=C3 PE=1 SV=3 - [CO3_MOUSE]	P01027	0.721401	0.141823	0.987082	-0.0187576	0.427302	0.421751	0.427302		Ig kappa chain V-V region HP R16,7 OS=Mus musculus PE=1 SV=1 - [KV5AB_MOUSE]	P01644	0.974188	0.0113574	0.99544	-0.00659308	2.08981	2.09156	2.08981			Coagulation factor XII OS=Mus musculus GN=F12 PE=1 SV=2 - [FA12_MOUSE]	Q80YC5	0.08683	1.06133	0.878701	-0.186555	0.135129	0.154084	0.154084		Ig kappa chain V-II region 26-10 OS=Mus musculus PE=1 SV=1 - [KV2A7_MOUSE]	P01631	0.245473	0.609997	0.816693	-0.292135	1.2224	1.49656	1.49656
Isocitrate dehydrogenase [NADP] cytoplasmic OS=Mus musculus GN=Idh1 PE=1 SV=2 - [IDHC_MOUSE]	O88844	0.844484	0.0734087	0.899048	-0.15353	0.0711884	0	0.0711884		Carboxypeptidase B2 OS=Mus musculus GN=Cpb2 PE=1 SV=1 - [CBPB2_MOUSE]	Q9JHH6	0.937925	0.0278318	0.970474	-0.0432388	0.0679887	0.0463562	0.0679887		Ig kappa chain C region OS=Mus musculus PE=1 SV=1 - [IGKC_MOUSE]	P01837	0.75101	0.124354	0.971864	-0.0411742	6.05532	5.86944	6.05532			Complement component C8 gamma chain OS=Mus musculus GN=C8g PE=1 SV=1 - [CO8G_MOUSE]	Q8VCG4	0.08683	1.06133	0.878701	-0.186555	0.201218	0.230231	0.230231		Ig heavy chain V region 102 OS=Mus musculus PE=1 SV=1 - [HVM06_MOUSE]	P01750	0.580239	0.236393	0.807568	-0.308345	0.828009	1.03551	1.03551
Ig lambda-2 chain C region OS=Mus musculus GN=Iglc2 PE=1 SV=1 - [LAC2_MOUSE]	P01844	0.192876	0.714722	0.892991	-0.163282	1.84385	1.64854	1.84385		Apolipoprotein E OS=Mus musculus GN=Apoe PE=1 SV=2 - [APOE_MOUSE]	P08226	0.698186	0.156029	0.970351	-0.0434214	0.624897	0.607511	0.624897		Ig heavy chain V region J539 OS=Mus musculus PE=1 SV=1 - [HVM40_MOUSE]	P01810	0.650188	0.186961	0.961687	-0.0563609	0.689023	0.660861	0.689023			Glucose-6-phosphate isomerase OS=Mus musculus GN=Gpi PE=1 SV=4 - [G6PI_MOUSE]	P06745	0.08683	1.06133	0.878701	-0.186555	0.0565774	0.0645135	0.0645135		Ig heavy chain V region 441 OS=Mus musculus PE=4 SV=1 - [HVM36_MOUSE]	P01806	0.580239	0.236393	0.807568	-0.308345	0.70159	0.830339	0.830339
Kininogen-1 OS=Mus musculus GN=Kng1 PE=1 SV=1 - [KNG1_MOUSE]	O08677	0.76733	0.115018	0.878107	-0.187532	0.215294	0.199238	0.215294		Pregnancy zone protein OS=Mus musculus GN=Pzp PE=1 SV=3 - [PZP_MOUSE]	Q61838	0.622732	0.205699	0.969112	-0.0452651	0.770768	0.747728	0.770768		Ig heavy chain V region VH558 A1/A4 OS=Mus musculus GN=Gm5629 PE=2 SV=1 - [HVM52_MOUSE]	P06327	0.901233	0.0451629	0.961687	-0.056361	0.44942	0.437634	0.44942			Hemoglobin subunit beta-2 OS=Mus musculus GN=Hbb-b2 PE=1 SV=2 - [HBB2_MOUSE]	P02089	0.745041	0.12782	0.878701	-0.186555	0.385719	0.453871	0.453871		Ig heavy chain V region PJ14 OS=Mus musculus PE=1 SV=1 - [HVM44_MOUSE]	P01820	0.698725	0.155694	0.807568	-0.308345	0.492046	0.652134	0.652134
Complement C1q subcomponent subunit C OS=Mus musculus GN=C1qc PE=1 SV=2 - [C1QC_MOUSE]	Q02105	0.25022	0.601678	0.868295	-0.203742	1.21219	1.04849	1.21219		Ig heavy chain V region PJ14 OS=Mus musculus PE=1 SV=1 - [HVM44_MOUSE]	P01820	0.814077	0.0893346	0.968192	-0.0466347	0.667353	0.650643	0.667353		Pigment epithelium-derived factor OS=Mus musculus GN=Serpinf1 PE=1 SV=2 - [PEDF_MOUSE]	P97298	0.894121	0.0486035	0.961687	-0.056361	0.125447	0.122775	0.125447			Ig heavy chain V region RF OS=Mus musculus PE=1 SV=1 - [HVM53_MOUSE]	P18524	0.08683	1.06133	0.878701	-0.186555	0.476034	0.541428	0.541428		Serine protease inhibitor A3K OS=Mus musculus GN=Serpina3k PE=1 SV=2 - [SPA3K_MOUSE]	P07759	0.544996	0.263607	0.801234	-0.319705	0.897492	1.14995	1.14995
Ig heavy chain V region 441 OS=Mus musculus PE=4 SV=1 - [HVM36_MOUSE]	P01806	0.688838	0.161883	0.868295	-0.203742	0.772067	0.70159	0.772067		Ig kappa chain V-II region 26-10 OS=Mus musculus PE=1 SV=1 - [KV2A7_MOUSE]	P01631	0.164508	0.783812	0.960598	-0.0579946	1.35364	1.30013	1.35364		Ig heavy chain V region AC38 205,12 OS=Mus musculus PE=1 SV=1 - [HVM51_MOUSE]	P06330	0.819349	0.0865309	0.954144	-0.0677211	2.30743	2.21812	2.30743			Serine protease inhibitor A3N OS=Mus musculus GN=Serpina3n PE=1 SV=1 - [SPA3N_MOUSE]	Q91WP6	0.631578	0.199573	0.866411	-0.206876	0.328839	0.365796	0.365796		Complement component C8 alpha chain OS=Mus musculus GN=C8a PE=1 SV=1 - [CO8A_MOUSE]	Q8K182	0.584425	0.233271	0.796272	-0.328666	0.143702	0.178923	0.178923
Ig gamma-2A chain C region secreted form OS=Mus musculus PE=1 SV=1 - [GCAB_MOUSE]	P01864	0.437787	0.358737	0.856851	-0.222884	1.95526	1.67637	1.95526		Ig gamma-3 chain C region OS=Mus musculus PE=1 SV=2 - [IGHG3_MOUSE]	P03987	0.836057	0.0777641	0.945242	-0.0812448	1.29906	1.1967	1.29906		Pregnancy zone protein OS=Mus musculus GN=Pzp PE=1 SV=3 - [PZP_MOUSE]	Q61838	0.592718	0.227152	0.943648	-0.0836786	0.770768	0.73008	0.770768			Serine protease inhibitor A3K OS=Mus musculus GN=Serpina3k PE=1 SV=2 - [SPA3K_MOUSE]	P07759	0.167157	0.776875	0.858499	-0.220112	0.897492	1.04527	1.04527		Tubulin alpha-4A chain OS=Mus musculus GN=Tuba4a PE=1 SV=1 - [TBA4A_MOUSE]	P68368	0.584425	0.233271	0.796272	-0.328666	0.190203	0.236822	0.236822
Kinesin-1 heavy chain OS=Mus musculus GN=Kif5b PE=1 SV=3 - [KINH_MOUSE]	Q61768	0.524074	0.280607	0.852059	-0.230975	0	0.0145642	0		Ig heavy chain V region 36-65 OS=Mus musculus PE=1 SV=1 - [HVM03_MOUSE]	P01747	0.83083	0.0804878	0.937448	-0.0931893	0.497185	0.456454	0.497185		Carboxypeptidase N catalytic chain OS=Mus musculus GN=Cpn1 PE=1 SV=1 - [CBPN_MOUSE]	Q9JJN5	0.672137	0.172542	0.942257	-0.0858079	0.320435	0.304058	0.320435			Serotransferrin OS=Mus musculus GN=Tf PE=1 SV=1 - [TRFE_MOUSE]	Q921I1	0.0648709	1.18795	0.848907	-0.236322	0.260279	0.307258	0.307258		Heat shock-related 70 kDa protein 2 OS=Mus musculus GN=Hspa2 PE=1 SV=2 - [HSP72_MOUSE]	P17156	0.818407	0.0870306	0.788454	-0.342901	0.0842432	0.0848838	0.0848838
Polymeric immunoglobulin receptor OS=Mus musculus GN=Pigr PE=1 SV=1 - [PIGR_MOUSE]	O70570	0.029386	1.53186	0.84408	-0.244549	0.195451	0.164998	0.195451		Prothrombin OS=Mus musculus GN=F2 PE=1 SV=1 - [THRB_MOUSE]	P19221	0.521353	0.282868	0.919924	-0.120413	0.389478	0.358453	0.389478		Complement C1q subcomponent subunit C OS=Mus musculus GN=C1qc PE=1 SV=2 - [C1QC_MOUSE]	Q02105	0.695855	0.157481	0.935053	-0.0968792	1.21219	1.13722	1.21219			Tubulin alpha-4A chain OS=Mus musculus GN=Tuba4a PE=1 SV=1 - [TBA4A_MOUSE]	P68368	0.746103	0.127201	0.848907	-0.236322	0.190203	0.225463	0.225463		Ig kappa chain V-V region L7 (Fragment) OS=Mus musculus GN=Gm10881 PE=1 SV=1 - [KV5A9_MOUSE]	P01642	0.300732	0.521821	0.781924	-0.3549	0.422251	0.537386	0.537386
Complement C1s-B subcomponent OS=Mus musculus GN=C1sb PE=2 SV=1 - [CS1B_MOUSE]	Q8CFG8	0.487343	0.312165	0.83106	-0.266976	0.641079	0.523062	0.641079		Vitamin D-binding protein OS=Mus musculus GN=Gc PE=1 SV=2 - [VTDB_MOUSE]	P21614	0.814668	0.0890192	0.903088	-0.147062	0.0473138	0	0.0473138		Vitronectin OS=Mus musculus GN=Vtn PE=1 SV=2 - [VTNC_MOUSE]	P29788	0.0901903	1.04484	0.934133	-0.0983005	1.19562	1.11667	1.19562			Carboxypeptidase B2 OS=Mus musculus GN=Cpb2 PE=1 SV=1 - [CBPB2_MOUSE]	Q9JHH6	0.793111	0.100666	0.845616	-0.241925	0.0326484	0.0463562	0.0463562		Hemopexin OS=Mus musculus GN=Hpx PE=1 SV=2 - [HEMO_MOUSE]	Q91X72	0.373364	0.427867	0.778496	-0.361239	0.115838	0.0845415	0.0845415
Alpha-1-antitrypsin 1-2 OS=Mus musculus GN=Serpina1b PE=1 SV=2 - [A1AT2_MOUSE]	P22599	0.200246	0.698437	0.823737	-0.279744	0.486875	0.399648	0.486875		Plasma protease C1 inhibitor OS=Mus musculus GN=Serping1 PE=1 SV=3 - [IC1_MOUSE]	P97290	0.350162	0.455731	0.873415	-0.19526	0.883025	0.767974	0.883025		Prothrombin OS=Mus musculus GN=F2 PE=1 SV=1 - [THRB_MOUSE]	P19221	0.799048	0.0974269	0.920745	-0.119126	0.389478	0.371249	0.389478			Ig heavy chain V region 914 OS=Mus musculus PE=1 SV=1 - [HVM56_MOUSE]	P18527	0.421099	0.375616	0.828448	-0.271517	1.51584	1.79287	1.79287		Inter-alpha-trypsin inhibitor heavy chain H3 OS=Mus musculus GN=Itih3 PE=1 SV=3 - [ITIH3_MOUSE]	Q61704	0.734228	0.134169	0.777743	-0.362634	0.0160585	0	0
Carboxypeptidase B2 OS=Mus musculus GN=Cpb2 PE=1 SV=1 - [CBPB2_MOUSE]	Q9JHH6	0.338384	0.47059	0.820649	-0.285163	0.0679887	0.0326484	0.0679887		Complement C1q subcomponent subunit C OS=Mus musculus GN=C1qc PE=1 SV=2 - [C1QC_MOUSE]	Q02105	0.228411	0.641283	0.859357	-0.21867	1.21219	1.03772	1.21219		Ig gamma-2A chain C region secreted form OS=Mus musculus PE=1 SV=1 - [GCAB_MOUSE]	P01864	0.761297	0.118446	0.916557	-0.125703	1.95526	1.82631	1.95526			Complement factor B OS=Mus musculus GN=Cfb PE=1 SV=2 - [CFAB_MOUSE]	P04186	0.00406097	2.39137	0.818854	-0.288321	0.41353	0.505011	0.505011		Complement component C9 OS=Mus musculus GN=C9 PE=1 SV=2 - [CO9_MOUSE]	P06683	0.734002	0.134303	0.773625	-0.370294	0.038601	0.0279894	0.0279894
Ig heavy chain V region 186-1 OS=Mus musculus PE=4 SV=2 - [HVM09_MOUSE]	P01753	0.374645	0.42638	0.812216	-0.300065	1.09442	0.902393	1.09442		Ig gamma-2A chain C region secreted form OS=Mus musculus PE=1 SV=1 - [GCAB_MOUSE]	P01864	0.299306	0.523885	0.852729	-0.229841	1.95526	1.6578	1.95526		Transferrin receptor protein 1 OS=Mus musculus GN=Tfrc PE=1 SV=1 - [TFR1_MOUSE]	Q62351	0.737322	0.132343	0.912337	-0.132362	0.212818	0.198635	0.212818			Ig kappa chain V-III region 50S10,1 OS=Mus musculus PE=1 SV=1 - [KV3A4_MOUSE]	P03977	0.279494	0.553627	0.810313	-0.303449	0.397482	0.444394	0.444394		Apolipoprotein E OS=Mus musculus GN=Apoe PE=1 SV=2 - [APOE_MOUSE]	P08226	0.0283061	1.54812	0.768927	-0.379082	0.571816	0.74496	0.74496
Vitronectin OS=Mus musculus GN=Vtn PE=1 SV=2 - [VTNC_MOUSE]	P29788	0.124549	0.90466	0.808259	-0.30711	1.19562	0.969305	1.19562		Ig heavy chain V region 186-1 OS=Mus musculus PE=4 SV=2 - [HVM09_MOUSE]	P01753	0.11702	0.931739	0.8438	-0.245027	1.09442	0.923787	1.09442		Ig heavy chain V region PJ14 OS=Mus musculus PE=1 SV=1 - [HVM44_MOUSE]	P01820	0.829851	0.0810001	0.912336	-0.132363	0.667353	0.652134	0.667353			Plasminogen OS=Mus musculus GN=Plg PE=1 SV=3 - [PLMN_MOUSE]	P20918	0.545845	0.262931	0.797083	-0.327198	0.404678	0.530893	0.530893		Keratin, type I cytoskeletal 15 OS=Mus musculus GN=Krt15 PE=1 SV=2 - [K1C15_MOUSE]	Q61414	0.251098	0.600156	0.764146	-0.38808	0.0397988	0	0
Plasminogen OS=Mus musculus GN=Plg PE=1 SV=3 - [PLMN_MOUSE]	P20918	0.0739776	1.1309	0.789903	-0.340252	0.512589	0.404678	0.512589		Ig heavy chain V region AC38 205,12 OS=Mus musculus PE=1 SV=1 - [HVM51_MOUSE]	P06330	0.272792	0.564168	0.828595	-0.271261	2.30743	1.91012	2.30743		Coagulation factor XII OS=Mus musculus GN=F12 PE=1 SV=2 - [FA12_MOUSE]	Q80YC5	0.597623	0.223573	0.890349	-0.167557	0.202739	0.179956	0.202739			Gelsolin OS=Mus musculus GN=Gsn PE=1 SV=3 - [GELS_MOUSE]	P13020	0.0603504	1.21932	0.794928	-0.331103	0.367695	0.46276	0.46276		Serum amyloid P-component OS=Mus musculus GN=Apcs PE=1 SV=2 - [SAMP_MOUSE]	P12246	0.322604	0.49133	0.763079	-0.390095	0.375504	0.483516	0.483516
Complement factor H OS=Mus musculus GN=Cfh PE=1 SV=2 - [CFAH_MOUSE]	P06909	0.553472	0.256904	0.785403	-0.348495	0.12548	0.103945	0.12548		Serotransferrin OS=Mus musculus GN=Tf PE=1 SV=1 - [TRFE_MOUSE]	Q921I1	0.351319	0.454298	0.828595	-0.271261	0.368496	0.307258	0.368496		Filamin-A OS=Mus musculus GN=Flna PE=1 SV=5 - [FLNA_MOUSE]	Q8BTM8	0.202657	0.693239	0.883817	-0.17818	0	0.0653117	0			Complement C1r-A subcomponent OS=Mus musculus GN=C1ra PE=1 SV=1 - [C1RA_MOUSE]	Q8CG16	0.22192	0.653804	0.79423	-0.332372	0.547627	0.690837	0.690837		Complement factor B OS=Mus musculus GN=Cfb PE=1 SV=2 - [CFAB_MOUSE]	P04186	0.113787	0.943908	0.759254	-0.397345	0.41353	0.545288	0.545288
Alpha-1-antitrypsin 1-3 OS=Mus musculus GN=Serpina1c PE=1 SV=2 - [A1AT3_MOUSE]	Q00896	0.127769	0.893576	0.746005	-0.422742	0.70665	0.530693	0.70665		Carboxypeptidase N subunit 2 OS=Mus musculus GN=Cpn2 PE=1 SV=2 - [CPN2_MOUSE]	Q9DBB9	0.779484	0.108193	0.826638	-0.274673	0.0539691	0	0.0539691		Ig heavy chain V region 186-1 OS=Mus musculus PE=4 SV=2 - [HVM09_MOUSE]	P01753	0.398413	0.399666	0.877896	-0.187878	1.09442	0.966342	1.09442			Ig heavy chain V region MC101 OS=Mus musculus PE=1 SV=1 - [HVM45_MOUSE]	P01821	0.236458	0.626246	0.785935	-0.347519	0.408688	0.534022	0.534022		Coagulation factor XII OS=Mus musculus GN=F12 PE=1 SV=2 - [FA12_MOUSE]	Q80YC5	0.0405453	1.39206	0.752406	-0.410416	0.135129	0.179956	0.179956
Ig heavy chain V region PJ14 OS=Mus musculus PE=1 SV=1 - [HVM44_MOUSE]	P01820	0.0216033	1.66548	0.736773	-0.440708	0.667353	0.492046	0.667353		Ig lambda-2 chain C region OS=Mus musculus GN=Iglc2 PE=1 SV=1 - [LAC2_MOUSE]	P01844	0.0938167	1.02772	0.822196	-0.282445	1.84385	1.51842	1.84385		Carboxypeptidase B2 OS=Mus musculus GN=Cpb2 PE=1 SV=1 - [CBPB2_MOUSE]	Q9JHH6	0.13473	0.870535	0.858307	-0.220434	0.0679887	0	0.0679887			Tubulin beta-4B chain OS=Mus musculus GN=Tubb4b PE=1 SV=1 - [TBB4B_MOUSE]	P68372	0.31366	0.503541	0.785935	-0.347519	0.17455	0.221054	0.221054		C4b-binding protein OS=Mus musculus GN=C4bpa PE=1 SV=3 - [C4BPA_MOUSE]	P08607	0.759562	0.119437	0.746981	-0.420857	0.0464519	0	0
Fibrinogen gamma chain OS=Mus musculus GN=Fgg PE=1 SV=1 - [FIBG_MOUSE]	Q8VCM7	0.631933	0.199329	0.729918	-0.454194	0.0342297	0	0.0342297		Alpha-1-antitrypsin 1-3 OS=Mus musculus GN=Serpina1c PE=1 SV=2 - [A1AT3_MOUSE]	Q00896	0.0372786	1.42854	0.804701	-0.313476	0.70665	0.569136	0.70665		Ig heavy chain V region 102 OS=Mus musculus PE=1 SV=1 - [HVM06_MOUSE]	P01750	0.411082	0.386072	0.832845	-0.26388	1.2255	1.03551	1.2255			Glia-derived nexin OS=Mus musculus GN=Serpine2 PE=1 SV=2 - [GDN_MOUSE]	Q07235	0.254885	0.593656	0.774942	-0.36784	0.303275	0.386569	0.386569		Talin-1 OS=Mus musculus GN=Tln1 PE=1 SV=2 - [TLN1_MOUSE]	P26039	0.230146	0.637996	0.743758	-0.427095	0.0996634	0.132926	0.132926
Alpha-2-HS-glycoprotein OS=Mus musculus GN=Ahsg PE=1 SV=1 - [FETUA_MOUSE]	P29699	0.637686	0.195393	0.712076	-0.489896	0.0655856	0	0.0655856		Mannan-binding lectin serine protease 2 OS=Mus musculus GN=Masp2 PE=1 SV=1 - [MASP2_MOUSE]	Q91WP0	0.409948	0.387271	0.790517	-0.339131	0.120804	0.059056	0.120804		Ig heavy chain V region MC101 OS=Mus musculus PE=1 SV=1 - [HVM45_MOUSE]	P01821	0.402997	0.394698	0.832845	-0.26388	0.726731	0.607222	0.726731			Ig kappa chain V-V region L6 (Fragment) OS=Mus musculus PE=4 SV=1 - [KV5A6_MOUSE]	P01638	0.0637588	1.19546	0.774942	-0.36784	1.01858	1.31601	1.31601		Coagulation factor XIII A chain OS=Mus musculus GN=F13a1 PE=1 SV=3 - [F13A_MOUSE]	Q8BH61	0.346579	0.460198	0.737205	-0.439862	0.0853576	0.115584	0.115584
Inter-alpha-trypsin inhibitor heavy chain H2 OS=Mus musculus GN=Itih2 PE=1 SV=1 - [ITIH2_MOUSE]	Q61703	0.300208	0.522578	0.70896	-0.496224	0.133171	0.0971738	0.133171		Ig heavy chain V region 441 OS=Mus musculus PE=4 SV=1 - [HVM36_MOUSE]	P01806	0.578219	0.237908	0.781207	-0.356224	0.772067	0.645931	0.772067		Complement factor B OS=Mus musculus GN=Cfb PE=1 SV=2 - [CFAB_MOUSE]	P04186	0.175829	0.75491	0.810023	-0.303965	0.67513	0.545288	0.67513			Clusterin OS=Mus musculus GN=Clu PE=1 SV=1 - [CLUS_MOUSE]	Q06890	0.156419	0.805711	0.763133	-0.389994	0.683994	0.901499	0.901499		Complement component C8 gamma chain OS=Mus musculus GN=C8g PE=1 SV=1 - [CO8G_MOUSE]	Q8VCG4	0.346579	0.460198	0.737205	-0.439863	0.201218	0.262642	0.262642
Ig kappa chain V-V region T1 OS=Mus musculus PE=4 SV=1 - [KV5A5_MOUSE]	P01637	0.803336	0.0951027	0.707457	-0.499286	0.113449	0	0.113449		Inter-alpha-trypsin inhibitor heavy chain H2 OS=Mus musculus GN=Itih2 PE=1 SV=1 - [ITIH2_MOUSE]	Q61703	0.038699	1.4123	0.781207	-0.356224	0.133171	0.103987	0.133171		Plasminogen OS=Mus musculus GN=Plg PE=1 SV=3 - [PLMN_MOUSE]	P20918	0.119659	0.922053	0.807462	-0.308533	0.512589	0.414091	0.512589			Ig heavy chain V region PJ14 OS=Mus musculus PE=1 SV=1 - [HVM44_MOUSE]	P01820	0.340081	0.468417	0.760978	-0.394073	0.492046	0.650643	0.650643		Carboxypeptidase N catalytic chain OS=Mus musculus GN=Cpn1 PE=1 SV=1 - [CBPN_MOUSE]	Q9JJN5	0.188137	0.725525	0.731423	-0.451223	0.220873	0.304058	0.304058
Complement C1s-A subcomponent OS=Mus musculus GN=C1sa PE=2 SV=2 - [CS1A_MOUSE]	Q8CG14	0.101413	0.993907	0.704892	-0.504525	1.36409	0.95626	1.36409		Ig kappa chain V-V region T1 OS=Mus musculus PE=4 SV=1 - [KV5A5_MOUSE]	P01637	0.843835	0.0737424	0.76606	-0.38447	0.113449	0	0.113449		Ig lambda-1 chain C region OS=Mus musculus PE=1 SV=1 - [LAC1_MOUSE]	P01843	0.42114	0.375574	0.801406	-0.319395	1.07266	0.851204	1.07266			Transthyretin OS=Mus musculus GN=Ttr PE=1 SV=1 - [TTHY_MOUSE]	P07309	0.0651613	1.18601	0.760978	-0.394073	0.725873	0.954904	0.954904		Hemoglobin subunit beta-1 OS=Mus musculus GN=Hbb-b1 PE=1 SV=2 - [HBB1_MOUSE]	P02088	0.497429	0.303269	0.731423	-0.451223	0.908122	1.21431	1.21431
Serotransferrin OS=Mus musculus GN=Tf PE=1 SV=1 - [TRFE_MOUSE]	Q921I1	0.13096	0.882861	0.703399	-0.507584	0.368496	0.260279	0.368496		Coagulation factor XII OS=Mus musculus GN=F12 PE=1 SV=2 - [FA12_MOUSE]	Q80YC5	0.283148	0.547986	0.76238	-0.391418	0.202739	0.154084	0.202739		Complement C1s-A subcomponent OS=Mus musculus GN=C1sa PE=2 SV=2 - [CS1A_MOUSE]	Q8CG14	0.222286	0.653087	0.793481	-0.333733	1.36409	1.078	1.36409			Histidine-rich glycoprotein OS=Mus musculus GN=Hrg PE=1 SV=2 - [HRG_MOUSE]	Q9ESB3	0.0346641	1.46012	0.7597	-0.396498	2.21306	2.91337	2.91337		Clusterin OS=Mus musculus GN=Clu PE=1 SV=1 - [CLUS_MOUSE]	Q06890	0.131044	0.882583	0.721407	-0.471115	0.683994	0.953686	0.953686
Xanthine dehydrogenase/oxidase OS=Mus musculus GN=Xdh PE=1 SV=5 - [XDH_MOUSE]	Q00519	0.212869	0.671887	0.693352	-0.52834	0	0.0163299	0		Complement factor B OS=Mus musculus GN=Cfb PE=1 SV=2 - [CFAB_MOUSE]	P04186	0.0867241	1.06186	0.751066	-0.412988	0.67513	0.505011	0.67513		Complement component C8 gamma chain OS=Mus musculus GN=C8g PE=1 SV=1 - [CO8G_MOUSE]	Q8VCG4	0.261958	0.581769	0.790106	-0.339881	0.331495	0.262642	0.331495			Keratin, type I cytoskeletal 15 OS=Mus musculus GN=Krt15 PE=1 SV=2 - [K1C15_MOUSE]	Q61414	0.733581	0.134552	0.756551	-0.40249	0.0397988	0.0363029	0.0363029		Ectonucleotide pyrophosphatase/phosphodiesterase family member 2 OS=Mus musculus GN=Enpp2 PE=1 SV=3 - [ENPP2_MOUSE]	Q9R1E6	0.408812	0.388476	0.716579	-0.480803	0.0161355	0.0175497	0.0175497
Carboxypeptidase N catalytic chain OS=Mus musculus GN=Cpn1 PE=1 SV=1 - [CBPN_MOUSE]	Q9JJN5	0.00657734	2.18195	0.689188	-0.53703	0.320435	0.220873	0.320435		Filamin-A OS=Mus musculus GN=Flna PE=1 SV=5 - [FLNA_MOUSE]	Q8BTM8	0.187295	0.727473	0.749876	-0.415277	0	0.0558831	0		Proteasome subunit alpha type-3 OS=Mus musculus GN=Psma3 PE=1 SV=3 - [PSA3_MOUSE]	O70435	0.59977	0.222015	0.785985	-0.347426	0.146733	0.0776496	0.146733			Ig kappa chain V-V region MOPC 149 OS=Mus musculus PE=1 SV=1 - [KV5A4_MOUSE]	P01636	0.298098	0.525641	0.742638	-0.429268	0.900512	1.17805	1.17805		Proteasome subunit alpha type-3 OS=Mus musculus GN=Psma3 PE=1 SV=3 - [PSA3_MOUSE]	O70435	0.804312	0.0945754	0.713789	-0.48643	0.0842569	0.0776496	0.0776496
Complement C1q subcomponent subunit A OS=Mus musculus GN=C1qa PE=1 SV=2 - [C1QA_MOUSE]	P98086	0.037086	1.43079	0.677926	-0.5608	3.35731	2.28261	3.35731		Coagulation factor XI OS=Mus musculus GN=F11 PE=2 SV=2 - [FA11_MOUSE]	Q91Y47	0.306869	0.513047	0.741118	-0.432225	0.118608	0.0870355	0.118608		Alpha-1-antitrypsin 1-3 OS=Mus musculus GN=Serpina1c PE=1 SV=2 - [A1AT3_MOUSE]	Q00896	0.366516	0.435907	0.769033	-0.378882	0.70665	0.557441	0.70665			Moesin OS=Mus musculus GN=Msn PE=1 SV=3 - [MOES_MOUSE]	P26041	0.00783357	2.10604	0.742638	-0.429268	0.145435	0.195973	0.195973		Glia-derived nexin OS=Mus musculus GN=Serpine2 PE=1 SV=2 - [GDN_MOUSE]	Q07235	0.00761009	2.11861	0.712208	-0.48963	0.303275	0.426116	0.426116
Ig heavy chain V region 102 OS=Mus musculus PE=1 SV=1 - [HVM06_MOUSE]	P01750	0.0663651	1.17806	0.672579	-0.572225	1.2255	0.828009	1.2255		Complement C1q subcomponent subunit A OS=Mus musculus GN=C1qa PE=1 SV=2 - [C1QA_MOUSE]	P98086	0.141185	0.850212	0.738064	-0.438183	3.35731	2.49811	3.35731		Ig lambda-2 chain C region OS=Mus musculus GN=Iglc2 PE=1 SV=1 - [LAC2_MOUSE]	P01844	0.147065	0.83249	0.754409	-0.406581	1.84385	1.40068	1.84385			4F2 cell-surface antigen heavy chain OS=Mus musculus GN=Slc3a2 PE=1 SV=1 - [4F2_MOUSE]	P10852	0.0278183	1.55567	0.735364	-0.443469	0.0335231	0	0		Gelsolin OS=Mus musculus GN=Gsn PE=1 SV=3 - [GELS_MOUSE]	P13020	0.223897	0.649951	0.702233	-0.509979	0.367695	0.527351	0.527351
Coagulation factor XII OS=Mus musculus GN=F12 PE=1 SV=2 - [FA12_MOUSE]	Q80YC5	0.150262	0.823151	0.669904	-0.577973	0.202739	0.135129	0.202739		Complement C1s-A subcomponent OS=Mus musculus GN=C1sa PE=2 SV=2 - [CS1A_MOUSE]	Q8CG14	0.141214	0.850122	0.732303	-0.449487	1.36409	0.994782	1.36409		Complement C1q subcomponent subunit A OS=Mus musculus GN=C1qa PE=1 SV=2 - [C1QA_MOUSE]	P98086	0.320905	0.493623	0.753519	-0.408284	3.35731	2.58904	3.35731			Coagulation factor V OS=Mus musculus GN=F5 PE=1 SV=1 - [FA5_MOUSE]	O88783	0.202551	0.693465	0.733686	-0.446766	0.127817	0.175294	0.175294		Serine protease inhibitor A3M OS=Mus musculus GN=Serpina3m PE=1 SV=2 - [SPA3M_MOUSE]	Q03734	0.134761	0.870437	0.701656	-0.511165	0.465852	0.664905	0.664905
Ig gamma-2B chain C region OS=Mus musculus GN=Igh-3 PE=1 SV=3 - [IGG2B_MOUSE]	P01867	0.00294158	2.53142	0.656764	-0.606553	0.937743	0.615729	0.937743		Plasma kallikrein OS=Mus musculus GN=Klkb1 PE=1 SV=2 - [KLKB1_MOUSE]	P26262	0.405143	0.392392	0.704794	-0.504726	0.0579796	0	0.0579796		Plasma protease C1 inhibitor OS=Mus musculus GN=Serping1 PE=1 SV=3 - [IC1_MOUSE]	P97290	0.167594	0.775742	0.744273	-0.426097	0.883025	0.656647	0.883025			Vitronectin OS=Mus musculus GN=Vtn PE=1 SV=2 - [VTNC_MOUSE]	P29788	0.149738	0.824669	0.727773	-0.45844	0.969305	1.32758	1.32758		Properdin OS=Mus musculus GN=Cfp PE=2 SV=2 - [PROP_MOUSE]	P11680	0.41575	0.381168	0.699374	-0.515864	0.137552	0.195778	0.195778
Multimerin-1 OS=Mus musculus GN=Mmrn1 PE=1 SV=2 - [MMRN1_MOUSE]	B2RPV6	0.0205736	1.68669	0.649779	-0.62198	0	0.0117228	0		Ig heavy chain V region MC101 OS=Mus musculus PE=1 SV=1 - [HVM45_MOUSE]	P01821	0.419645	0.377118	0.698732	-0.517188	0.726731	0.534022	0.726731		Ig gamma-2B chain C region OS=Mus musculus GN=Igh-3 PE=1 SV=3 - [IGG2B_MOUSE]	P01867	0.0211675	1.67433	0.721265	-0.471398	0.937743	0.676812	0.937743			Erythrocyte band 7 integral membrane protein OS=Mus musculus GN=Stom PE=1 SV=3 - [STOM_MOUSE]	P54116	0.370461	0.431257	0.721713	-0.470502	0.0762804	0.0852833	0.0852833		Catalase OS=Mus musculus GN=Cat PE=1 SV=4 - [CATA_MOUSE]	P24270	0.30375	0.517484	0.684049	-0.547829	0.0327055	0	0
Ig gamma-3 chain C region OS=Mus musculus PE=1 SV=2 - [IGHG3_MOUSE]	P03987	0.205014	0.688216	0.647131	-0.62787	1.29906	0.818355	1.29906		Keratin, type II cytoskeletal 2 epidermal OS=Mus musculus GN=Krt2 PE=1 SV=1 - [K22E_MOUSE]	Q3TTY5	0.431884	0.364633	0.695804	-0.523248	0.0238372	0	0.0238372		Mannan-binding lectin serine protease 1 OS=Mus musculus GN=Masp1 PE=1 SV=2 - [MASP1_MOUSE]	P98064	0.102343	0.989942	0.694038	-0.526914	0.176405	0.123208	0.176405			Insulin-like growth factor-binding protein complex acid labile subunit OS=Mus musculus GN=Igfals PE=1 SV=1 - [ALS_MOUSE]	P70389	0.323587	0.490009	0.717457	-0.479036	0.0530343	0.0737937	0.0737937		Tubulin beta-4B chain OS=Mus musculus GN=Tubb4b PE=1 SV=1 - [TBB4B_MOUSE]	P68372	0.421732	0.374963	0.682519	-0.551059	0.17455	0.259397	0.259397
Selenoprotein P OS=Mus musculus GN=Sepp1 PE=1 SV=3 - [SEPP1_MOUSE]	P70274	0.466131	0.331492	0.624081	-0.680195	0.0593687	0	0.0593687		Ig kappa chain V-V region HP R16,7 OS=Mus musculus PE=1 SV=1 - [KV5AB_MOUSE]	P01644	0.178722	0.747821	0.686142	-0.543421	2.08981	1.45503	2.08981		Serotransferrin OS=Mus musculus GN=Tf PE=1 SV=1 - [TRFE_MOUSE]	Q921I1	0.257257	0.589633	0.687062	-0.541487	0.368496	0.258953	0.368496			Inter-alpha-trypsin inhibitor heavy chain H1 OS=Mus musculus GN=Itih1 PE=1 SV=2 - [ITIH1_MOUSE]	Q61702	0.11146	0.95288	0.712843	-0.488344	0.154552	0.215594	0.215594		Moesin OS=Mus musculus GN=Msn PE=1 SV=3 - [MOES_MOUSE]	P26041	0.387196	0.412069	0.672973	-0.57138	0.145435	0.212877	0.212877
Complement factor B OS=Mus musculus GN=Cfb PE=1 SV=2 - [CFAB_MOUSE]	P04186	0.0327854	1.48432	0.615014	-0.701309	0.67513	0.41353	0.67513		Ig heavy chain V region 102 OS=Mus musculus PE=1 SV=1 - [HVM06_MOUSE]	P01750	0.138924	0.857222	0.67504	-0.566956	1.2255	0.837402	1.2255		C4b-binding protein OS=Mus musculus GN=C4bpa PE=1 SV=3 - [C4BPA_MOUSE]	P08607	0.470258	0.327664	0.639847	-0.6442	0.144247	0	0.144247			Keratin, type I cytoskeletal 13 OS=Mus musculus GN=Krt13 PE=1 SV=2 - [K1C13_MOUSE]	P08730	0.358556	0.445443	0.709129	-0.49588	0	0.0474396	0.0474396		Ig kappa chain V-III region PC 7210 OS=Mus musculus PE=1 SV=1 - [KV3AG_MOUSE]	P01668	0.226494	0.644943	0.667694	-0.58274	0.906556	1.31914	1.31914
Ig gamma-2A chain C region, A allele OS=Mus musculus GN=Ighg PE=1 SV=1 - [GCAA_MOUSE]	P01863	0.0315762	1.50064	0.611454	-0.709684	2.26271	1.37827	2.26271		Complement component C8 gamma chain OS=Mus musculus GN=C8g PE=1 SV=1 - [CO8G_MOUSE]	Q8VCG4	0.34526	0.461854	0.662876	-0.593189	0.331495	0.230231	0.331495		Ig gamma-3 chain C region OS=Mus musculus PE=1 SV=2 - [IGHG3_MOUSE]	P03987	0.283265	0.547807	0.635039	-0.655084	1.29906	0.820163	1.29906			Talin-1 OS=Mus musculus GN=Tln1 PE=1 SV=2 - [TLN1_MOUSE]	P26039	0.242947	0.614489	0.702222	-0.51	0.0996634	0.140784	0.140784		Ig heavy chain V region MC101 OS=Mus musculus PE=1 SV=1 - [HVM45_MOUSE]	P01821	0.1634	0.786747	0.659376	-0.600827	0.408688	0.607222	0.607222
Complement component C8 gamma chain OS=Mus musculus GN=C8g PE=1 SV=1 - [CO8G_MOUSE]	Q8VCG4	0.231937	0.63463	0.58247	-0.779744	0.331495	0.201218	0.331495		Mannan-binding lectin serine protease 1 OS=Mus musculus GN=Masp1 PE=1 SV=2 - [MASP1_MOUSE]	P98064	0.16146	0.791935	0.60512	-0.724707	0.176405	0.109417	0.176405		Beta-2-glycoprotein 1 OS=Mus musculus GN=Apoh PE=1 SV=1 - [APOH_MOUSE]	Q01339	0.273794	0.562576	0.577232	-0.792777	0.10793	0	0.10793			Pyruvate kinase PKM OS=Mus musculus GN=Pkm PE=1 SV=4 - [KPYM_MOUSE]	P52480	0.460501	0.336769	0.700167	-0.51423	0.279376	0.392112	0.392112		Keratin, type I cytoskeletal 13 OS=Mus musculus GN=Krt13 PE=1 SV=2 - [K1C13_MOUSE]	P08730	0.768184	0.114535	0.651633	-0.617869	0	0.0545097	0.0545097
Prothrombin OS=Mus musculus GN=F2 PE=1 SV=1 - [THRB_MOUSE]	P19221	0.0179102	1.7469	0.578863	-0.788705	0.389478	0.224857	0.389478		Ig gamma-2A chain C region, A allele OS=Mus musculus GN=Ighg PE=1 SV=1 - [GCAA_MOUSE]	P01863	0.094228	1.02582	0.604375	-0.726484	2.26271	1.37578	2.26271		Ig gamma-2A chain C region, A allele OS=Mus musculus GN=Ighg PE=1 SV=1 - [GCAA_MOUSE]	P01863	0.318362	0.497079	0.556368	-0.845889	2.26271	1.37516	2.26271			Ig gamma-3 chain C region OS=Mus musculus PE=1 SV=2 - [IGHG3_MOUSE]	P03987	0.0522444	1.28196	0.68462	-0.546625	0.818355	1.1967	1.1967		Ig kappa chain V-V region MOPC 149 OS=Mus musculus PE=1 SV=1 - [KV5A4_MOUSE]	P01636	0.402231	0.395524	0.638438	-0.647381	0.900512	1.36293	1.36293
Proteasome subunit alpha type-3 OS=Mus musculus GN=Psma3 PE=1 SV=3 - [PSA3_MOUSE]	O70435	0.532393	0.273768	0.561028	-0.833856	0.146733	0.0842569	0.146733		Complement C1r-A subcomponent OS=Mus musculus GN=C1ra PE=1 SV=1 - [C1RA_MOUSE]	Q8CG16	0.0149142	1.8264	0.588385	-0.765167	1.1717	0.690837	1.1717		Complement C1r-A subcomponent OS=Mus musculus GN=C1ra PE=1 SV=1 - [C1RA_MOUSE]	Q8CG16	0.0301044	1.52137	0.548973	-0.865194	1.1717	0.64683	1.1717			Ig kappa chain V-V region L7 (Fragment) OS=Mus musculus GN=Gm10881 PE=1 SV=1 - [KV5A9_MOUSE]	P01642	0.39306	0.405541	0.68064	-0.555037	0.422251	0.661061	0.661061		Insulin-like growth factor-binding protein complex acid labile subunit OS=Mus musculus GN=Igfals PE=1 SV=1 - [ALS_MOUSE]	P70389	0.402231	0.395524	0.638438	-0.647381	0.0530343	0.0847729	0.0847729
Ig heavy chain V region MC101 OS=Mus musculus PE=1 SV=1 - [HVM45_MOUSE]	P01821	0.154728	0.810432	0.549158	-0.864706	0.726731	0.408688	0.726731		Histidine-rich glycoprotein OS=Mus musculus GN=Hrg PE=1 SV=2 - [HRG_MOUSE]	Q9ESB3	0.0121806	1.91433	0.567204	-0.81806	5.14557	2.91337	5.14557		Ribonuclease 4 OS=Mus musculus GN=Rnase4 PE=1 SV=1 - [RNAS4_MOUSE]	Q9JJH1	0.600094	0.221781	0.540343	-0.888052	0.143796	0	0.143796			Carboxypeptidase N catalytic chain OS=Mus musculus GN=Cpn1 PE=1 SV=1 - [CBPN_MOUSE]	Q9JJN5	0.0572018	1.24259	0.67112	-0.575358	0.220873	0.329616	0.329616		Kinesin-1 heavy chain OS=Mus musculus GN=Kif5b PE=1 SV=3 - [KINH_MOUSE]	Q61768	0.347607	0.458911	0.637736	-0.648969	0.0145642	0	0
Ras-related protein Rap-1A OS=Mus musculus GN=Rap1a PE=1 SV=1 - [RAP1A_MOUSE]	P62835	0.479585	0.319134	0.539882	-0.889284	0.236082	0.114038	0.236082		Ig gamma-2B chain C region OS=Mus musculus GN=Igh-3 PE=1 SV=3 - [IGG2B_MOUSE]	P01867	0.0529407	1.27621	0.562919	-0.829	0.937743	0.532624	0.937743		Heat shock cognate 71 kDa protein OS=Mus musculus GN=Hspa8 PE=1 SV=1 - [HSP7C_MOUSE]	P63017	0.0640649	1.19338	0.526933	-0.924309	0.0822509	0	0.0822509			Ig kappa chain V19-17 OS=Mus musculus GN=Igk-V19-17 PE=1 SV=1 - [KV5A1_MOUSE]	P01633	0.177365	0.751132	0.662571	-0.593853	0.24273	0.325653	0.325653		Alpha-actinin-1 OS=Mus musculus GN=Actn1 PE=1 SV=1 - [ACTN1_MOUSE]	Q7TPR4	0.125744	0.900514	0.629657	-0.667362	0.0154804	0	0
Ig mu chain C region OS=Mus musculus GN=Ighm PE=1 SV=2 - [IGHM_MOUSE]	P01872	0.0510658	1.29187	0.516194	-0.954015	9.28527	4.84836	9.28527		Beta-2-glycoprotein 1 OS=Mus musculus GN=Apoh PE=1 SV=1 - [APOH_MOUSE]	Q01339	0.366594	0.435815	0.542618	-0.881992	0.10793	0.0461932	0.10793		Mannan-binding lectin serine protease 2 OS=Mus musculus GN=Masp2 PE=1 SV=1 - [MASP2_MOUSE]	Q91WP0	0.0285746	1.54402	0.526737	-0.924844	0.120804	0.0636785	0.120804			Myosin-9 OS=Mus musculus GN=Myh9 PE=1 SV=4 - [MYH9_MOUSE]	Q8VDD5	0.00347656	2.45885	0.648964	-0.623789	0.0541099	0.0833708	0.0833708		Myosin-9 OS=Mus musculus GN=Myh9 PE=1 SV=4 - [MYH9_MOUSE]	Q8VDD5	0.327502	0.484786	0.628691	-0.669578	0.0541099	0.0880852	0.0880852
Lactotransferrin OS=Mus musculus GN=Ltf PE=1 SV=4 - [TRFL_MOUSE]	P08071	0.182744	0.738158	0.50131	-0.996224	0.095481	0.0456233	0.095481		Ig kappa chain V19-17 OS=Mus musculus GN=Igk-V19-17 PE=1 SV=1 - [KV5A1_MOUSE]	P01633	0.623462	0.20519	0.523698	-0.933194	0.457601	0.325653	0.457601		Ras-related protein Rap-1A OS=Mus musculus GN=Rap1a PE=1 SV=1 - [RAP1A_MOUSE]	P62835	0.507095	0.294911	0.506306	-0.981918	0.236082	0.124033	0.236082			Peptidyl-prolyl cis-trans isomerase A OS=Mus musculus GN=Ppia PE=1 SV=2 - [PPIA_MOUSE]	P17742	0.647766	0.188582	0.634548	-0.656198	0	0.099262	0.099262		Prothrombin OS=Mus musculus GN=F2 PE=1 SV=1 - [THRB_MOUSE]	P19221	0.35038	0.455461	0.628691	-0.669578	0.224857	0.371249	0.371249
Ribonuclease 4 OS=Mus musculus GN=Rnase4 PE=1 SV=1 - [RNAS4_MOUSE]	Q9JJH1	0.559816	0.251955	0.491179	-1.02568	0.143796	0	0.143796		Ig mu chain C region OS=Mus musculus GN=Ighm PE=1 SV=2 - [IGHM_MOUSE]	P01872	0.0298566	1.52496	0.505688	-0.983681	9.28527	4.72699	9.28527		Metalloproteinase inhibitor 3 OS=Mus musculus GN=Timp3 PE=1 SV=1 - [TIMP3_MOUSE]	P39876	0.503663	0.29786	0.486334	-1.03998	0.139832	0	0.139832			Prothrombin OS=Mus musculus GN=F2 PE=1 SV=1 - [THRB_MOUSE]	P19221	0.121236	0.916368	0.629251	-0.668292	0.224857	0.358453	0.358453		Tubulin alpha-1C chain OS=Mus musculus GN=Tuba1c PE=1 SV=1 - [TBA1C_MOUSE]	P68373	0.235808	0.627441	0.612788	-0.706539	0.0783682	0.154676	0.154676
C4b-binding protein OS=Mus musculus GN=C4bpa PE=1 SV=3 - [C4BPA_MOUSE]	P08607	0.264833	0.577028	0.477953	-1.06506	0.144247	0.0464519	0.144247		Selenoprotein P OS=Mus musculus GN=Sepp1 PE=1 SV=3 - [SEPP1_MOUSE]	P70274	0.308838	0.510269	0.505523	-0.984152	0.0593687	0	0.0593687		Ig mu chain C region OS=Mus musculus GN=Ighm PE=1 SV=2 - [IGHM_MOUSE]	P01872	0.0131341	1.8816	0.475224	-1.07332	9.28527	4.42651	9.28527			Beta-2-glycoprotein 1 OS=Mus musculus GN=Apoh PE=1 SV=1 - [APOH_MOUSE]	Q01339	0.611397	0.213677	0.598541	-0.740477	0	0.0461932	0.0461932		Serine protease inhibitor A3N OS=Mus musculus GN=Serpina3n PE=1 SV=1 - [SPA3N_MOUSE]	Q91WP6	0.241235	0.61756	0.604812	-0.725441	0.328839	0.524722	0.524722
Serum albumin OS=Mus musculus GN=Alb PE=1 SV=3 - [ALBU_MOUSE]	P07724	0.0189544	1.72229	0.475043	-1.07387	3.13564	1.48726	3.13564		Complement factor H OS=Mus musculus GN=Cfh PE=1 SV=2 - [CFAH_MOUSE]	P06909	0.0333119	1.4774	0.446911	-1.16194	0.12548	0.0564764	0.12548		Histidine-rich glycoprotein OS=Mus musculus GN=Hrg PE=1 SV=2 - [HRG_MOUSE]	Q9ESB3	0.0226715	1.64452	0.466711	-1.0994	5.14557	2.40876	5.14557			Alpha-2-HS-glycoprotein OS=Mus musculus GN=Ahsg PE=1 SV=1 - [FETUA_MOUSE]	P29699	0.614007	0.211827	0.595875	-0.746919	0	0.0716884	0.0716884		Inter-alpha-trypsin inhibitor heavy chain H1 OS=Mus musculus GN=Itih1 PE=1 SV=2 - [ITIH1_MOUSE]	Q61702	0.0698506	1.15583	0.597204	-0.743704	0.154552	0.257392	0.257392
CD5 antigen-like OS=Mus musculus GN=Cd5l PE=1 SV=3 - [CD5L_MOUSE]	Q9QWK4	0.117209	0.931039	0.474888	-1.07434	1.36874	0.674087	1.36874		C4b-binding protein OS=Mus musculus GN=C4bpa PE=1 SV=3 - [C4BPA_MOUSE]	P08607	0.13204	0.879296	0.441988	-1.17792	0.144247	0	0.144247		Thrombospondin-1 OS=Mus musculus GN=Thbs1 PE=1 SV=1 - [TSP1_MOUSE]	P35441	0.0165901	1.78015	0.466669	-1.09953	0.562699	0.261452	0.562699			Properdin OS=Mus musculus GN=Cfp PE=2 SV=2 - [PROP_MOUSE]	P11680	0.119379	0.923072	0.575245	-0.797751	0.137552	0.236604	0.236604		Haptoglobin OS=Mus musculus GN=Hp PE=1 SV=1 - [HPT_MOUSE]	Q61646	0.0799264	1.09731	0.571105	-0.808172	0.0411733	0.12409	0.12409
Complement C1r-A subcomponent OS=Mus musculus GN=C1ra PE=1 SV=1 - [C1RA_MOUSE]	Q8CG16	0.000748807	3.12563	0.467313	-1.09754	1.1717	0.547627	1.1717		Serum albumin OS=Mus musculus GN=Alb PE=1 SV=3 - [ALBU_MOUSE]	P07724	0.0195619	1.70859	0.426317	-1.23	3.13564	1.33728	3.13564		Complement factor H OS=Mus musculus GN=Cfh PE=1 SV=2 - [CFAH_MOUSE]	P06909	0.0191659	1.71747	0.455635	-1.13405	0.12548	0.0311818	0.12548			Tetranectin OS=Mus musculus GN=Clec3b PE=1 SV=2 - [TETN_MOUSE]	P43025	0.285095	0.54501	0.573158	-0.802995	0	0.101785	0.101785		Kininogen-1 OS=Mus musculus GN=Kng1 PE=1 SV=1 - [KNG1_MOUSE]	O08677	0.423804	0.372835	0.571037	-0.808345	0.199238	0.328902	0.328902
Vitamin D-binding protein OS=Mus musculus GN=Gc PE=1 SV=2 - [VTDB_MOUSE]	P21614	0.180401	0.743761	0.465476	-1.10322	0.0473138	0	0.0473138		Metalloproteinase inhibitor 3 OS=Mus musculus GN=Timp3 PE=1 SV=1 - [TIMP3_MOUSE]	P39876	0.414875	0.382083	0.38901	-1.36212	0.139832	0	0.139832		Ig kappa chain V19-17 OS=Mus musculus GN=Igk-V19-17 PE=1 SV=1 - [KV5A1_MOUSE]	P01633	0.448325	0.348407	0.421309	-1.24705	0.457601	0.211203	0.457601			Xanthine dehydrogenase/oxidase OS=Mus musculus GN=Xdh PE=1 SV=5 - [XDH_MOUSE]	Q00519	0.200785	0.697268	0.562861	-0.829149	0.0163299	0	0		Tubulin beta-1 chain OS=Mus musculus GN=Tubb1 PE=1 SV=1 - [TBB1_MOUSE]	A2AQ07	0.0800442	1.09667	0.571037	-0.808345	0.121422	0.212533	0.212533
Histidine-rich glycoprotein OS=Mus musculus GN=Hrg PE=1 SV=2 - [HRG_MOUSE]	Q9ESB3	0.00530066	2.27567	0.430904	-1.21456	5.14557	2.21306	5.14557		Ribonuclease 4 OS=Mus musculus GN=Rnase4 PE=1 SV=1 - [RNAS4_MOUSE]	Q9JJH1	0.434776	0.361734	0.387227	-1.36875	0.143796	0	0.143796		Coagulation factor XI OS=Mus musculus GN=F11 PE=2 SV=2 - [FA11_MOUSE]	Q91Y47	0.0427799	1.36876	0.419026	-1.25489	0.118608	0.0248668	0.118608			Heat shock cognate 71 kDa protein OS=Mus musculus GN=Hspa8 PE=1 SV=1 - [HSP7C_MOUSE]	P63017	0.265651	0.575688	0.548124	-0.867425	0.0450261	0.158822	0.158822		Beta-enolase OS=Mus musculus GN=Eno3 PE=1 SV=3 - [ENOB_MOUSE]	P21550	0.0671413	1.17301	0.569241	-0.812889	0	0.083807	0.083807
Pigment epithelium-derived factor OS=Mus musculus GN=Serpinf1 PE=1 SV=2 - [PEDF_MOUSE]	P97298	0.140275	0.85302	0.37436	-1.4175	0.125447	0.0345099	0.125447		Properdin OS=Mus musculus GN=Cfp PE=2 SV=2 - [PROP_MOUSE]	P11680	0.00953367	2.02074	0.350202	-1.51374	0.677615	0.236604	0.677615		CD5 antigen-like OS=Mus musculus GN=Cd5l PE=1 SV=3 - [CD5L_MOUSE]	Q9QWK4	0.063536	1.19698	0.416628	-1.26317	1.36874	0.584267	1.36874			Multimerin-1 OS=Mus musculus GN=Mmrn1 PE=1 SV=2 - [MMRN1_MOUSE]	B2RPV6	0.437872	0.358653	0.534968	-0.902476	0.0117228	0.0131064	0.0131064		Proteasome subunit beta type-4 OS=Mus musculus GN=Psmb4 PE=1 SV=1 - [PSB4_MOUSE]	P99026	0.106044	0.974513	0.555209	-0.848896	0.0548001	0.0894046	0.0894046
Ig kappa chain V19-17 OS=Mus musculus GN=Igk-V19-17 PE=1 SV=1 - [KV5A1_MOUSE]	P01633	0.482422	0.316573	0.346986	-1.52705	0.457601	0.24273	0.457601		Pigment epithelium-derived factor OS=Mus musculus GN=Serpinf1 PE=1 SV=2 - [PEDF_MOUSE]	P97298	0.015166	1.81913	0.349584	-1.51629	0.125447	0	0.125447		Serum albumin OS=Mus musculus GN=Alb PE=1 SV=3 - [ALBU_MOUSE]	P07724	0.0142551	1.84603	0.398141	-1.32865	3.13564	1.24746	3.13564			Ras-related protein Rap-1A OS=Mus musculus GN=Rap1a PE=1 SV=1 - [RAP1A_MOUSE]	P62835	0.441718	0.354855	0.515106	-0.957059	0.114038	0.235443	0.235443		Keratin, type I cytoskeletal 16 OS=Mus musculus GN=Krt16 PE=1 SV=3 - [K1C16_MOUSE]	Q9Z2K1	0.0769308	1.1139	0.545212	-0.875111	0	0.033627	0.033627
Coagulation factor XI OS=Mus musculus GN=F11 PE=2 SV=2 - [FA11_MOUSE]	Q91Y47	0.0427868	1.36869	0.342727	-1.54487	0.118608	0.022863	0.118608		CD5 antigen-like OS=Mus musculus GN=Cd5l PE=1 SV=3 - [CD5L_MOUSE]	Q9QWK4	0.0214828	1.66791	0.346796	-1.52784	1.36874	0.479449	1.36874		Fructose-bisphosphate aldolase A OS=Mus musculus GN=Aldoa PE=1 SV=2 - [ALDOA_MOUSE]	P05064	0.0127471	1.89459	0.376599	-1.4089	0.211063	0	0.211063			Hemopexin OS=Mus musculus GN=Hpx PE=1 SV=2 - [HEMO_MOUSE]	Q91X72	0.328338	0.483679	0.507319	-0.979036	0.115838	0.214648	0.214648		6-phosphogluconate dehydrogenase, decarboxylating OS=Mus musculus GN=Pgd PE=1 SV=3 - [6PGD_MOUSE]	Q9DCD0	0.0699053	1.15549	0.542802	-0.881502	0	0.041423	0.041423
Beta-2-glycoprotein 1 OS=Mus musculus GN=Apoh PE=1 SV=1 - [APOH_MOUSE]	Q01339	0.0788951	1.10295	0.324779	-1.62247	0.10793	0	0.10793		Polymeric immunoglobulin receptor OS=Mus musculus GN=Pigr PE=1 SV=1 - [PIGR_MOUSE]	O70570	0.0422941	1.37372	0.342309	-1.54663	0.195451	0.0686262	0.195451		Polymeric immunoglobulin receptor OS=Mus musculus GN=Pigr PE=1 SV=1 - [PIGR_MOUSE]	O70570	0.100244	0.998942	0.372461	-1.42484	0.195451	0.0769902	0.195451			Lactotransferrin OS=Mus musculus GN=Ltf PE=1 SV=4 - [TRFL_MOUSE]	P08071	0.116957	0.931974	0.507319	-0.979036	0.0456233	0.0894932	0.0894932		Xanthine dehydrogenase/oxidase OS=Mus musculus GN=Xdh PE=1 SV=5 - [XDH_MOUSE]	Q00519	0.172885	0.762243	0.538208	-0.893765	0.0163299	0	0
Metalloproteinase inhibitor 3 OS=Mus musculus GN=Timp3 PE=1 SV=1 - [TIMP3_MOUSE]	P39876	0.2909	0.536256	0.298599	-1.74372	0.139832	0	0.139832		Complement C1s-B subcomponent OS=Mus musculus GN=C1sb PE=2 SV=1 - [CS1B_MOUSE]	Q8CFG8	0.339522	0.469132	0.313094	-1.67533	0.641079	0.244208	0.641079		Ig heavy chain V region 36-65 OS=Mus musculus PE=1 SV=1 - [HVM03_MOUSE]	P01747	0.457698	0.339421	0.34821	-1.52197	0.497185	0.260826	0.497185			Immunoglobulin J chain OS=Mus musculus GN=Jchain PE=1 SV=4 - [IGJ_MOUSE]	P01592	0.265391	0.576114	0.488432	-1.03377	0.132865	0.198062	0.198062		Thrombospondin-1 OS=Mus musculus GN=Thbs1 PE=1 SV=1 - [TSP1_MOUSE]	P35441	0.163796	0.785698	0.497273	-1.00789	0.132791	0.261452	0.261452
Ig heavy chain V region 36-65 OS=Mus musculus PE=1 SV=1 - [HVM03_MOUSE]	P01747	0.535443	0.271287	0.285975	-1.80604	0.497185	0.367413	0.497185		Ig heavy chain V-III region J606 OS=Mus musculus PE=1 SV=1 - [HVM32_MOUSE]	P01801	0.484635	0.314585	0.259123	-1.94829	1.10348	0.69626	1.10348		Ig kappa chain V-III region PC 3741/TEPC 111 OS=Mus musculus PE=1 SV=1 - [KV3A8_MOUSE]	P01660	0.518548	0.285211	0.303465	-1.7204	0.349319	0	0.349319			Proteoglycan 4 OS=Mus musculus GN=Prg4 PE=1 SV=2 - [PRG4_MOUSE]	Q9JM99	0.0636957	1.19589	0.481284	-1.05504	0.0390439	0.0795822	0.0795822		Phosphatidylinositol-glycan-specific phospholipase D OS=Mus musculus GN=Gpld1 PE=1 SV=1 - [PHLD_MOUSE]	O70362	0.0436265	1.36025	0.467105	-1.09818	0.0380803	0.0473033	0.0473033
Ig heavy chain V region MOPC 104E OS=Mus musculus PE=1 SV=1 - [HVM12_MOUSE]	P01756	0.478141	0.320444	0.284604	-1.81297	1.082	0.614458	1.082		Thrombospondin-1 OS=Mus musculus GN=Thbs1 PE=1 SV=1 - [TSP1_MOUSE]	P35441	0.00477507	2.32102	0.24762	-2.0138	0.562699	0.138694	0.562699		Ig heavy chain V region MOPC 104E OS=Mus musculus PE=1 SV=1 - [HVM12_MOUSE]	P01756	0.475193	0.32313	0.301542	-1.72957	1.082	0.601481	1.082			Alpha-actinin-1 OS=Mus musculus GN=Actn1 PE=1 SV=1 - [ACTN1_MOUSE]	Q7TPR4	0.253124	0.596667	0.469094	-1.09205	0.0154804	0	0		Inter-alpha-trypsin inhibitor heavy chain H2 OS=Mus musculus GN=Itih2 PE=1 SV=1 - [ITIH2_MOUSE]	Q61703	0.0145201	1.83803	0.451444	-1.14738	0.0971738	0.214349	0.214349
Ig kappa chain V-III region PC 3741/TEPC 111 OS=Mus musculus PE=1 SV=1 - [KV3A8_MOUSE]	P01660	0.49283	0.307303	0.26281	-1.92791	0.349319	0	0.349319		Ig kappa chain V-III region PC 3741/TEPC 111 OS=Mus musculus PE=1 SV=1 - [KV3A8_MOUSE]	P01660	0.461416	0.335907	0.238913	-2.06544	0.349319	0	0.349319		Tubulin beta-5 chain OS=Mus musculus GN=Tubb5 PE=1 SV=1 - [TBB5_MOUSE]	P99024	0.0866802	1.06208	0.291078	-1.78052	0.184844	0	0.184844			Coagulation factor XI OS=Mus musculus GN=F11 PE=2 SV=2 - [FA11_MOUSE]	Q91Y47	0.202695	0.693158	0.462444	-1.11265	0.022863	0.0870355	0.0870355		Transforming growth factor-beta-induced protein ig-h3 OS=Mus musculus GN=Tgfbi PE=1 SV=1 - [BGH3_MOUSE]	P82198	0.195008	0.709948	0.441137	-1.1807	0	0.0295675	0.0295675
Thrombospondin-1 OS=Mus musculus GN=Thbs1 PE=1 SV=1 - [TSP1_MOUSE]	P35441	0.0237214	1.62486	0.232062	-2.10742	0.562699	0.132791	0.562699		Fructose-bisphosphate aldolase A OS=Mus musculus GN=Aldoa PE=1 SV=2 - [ALDOA_MOUSE]	P05064	0.0482325	1.31666	0.233231	-2.10017	0.211063	0	0.211063		Properdin OS=Mus musculus GN=Cfp PE=2 SV=2 - [PROP_MOUSE]	P11680	0.0143061	1.84448	0.288046	-1.79563	0.677615	0.195778	0.677615			Kininogen-1 OS=Mus musculus GN=Kng1 PE=1 SV=1 - [KNG1_MOUSE]	O08677	0.187174	0.727755	0.412698	-1.27684	0.199238	0.455339	0.455339		Multimerin-1 OS=Mus musculus GN=Mmrn1 PE=1 SV=2 - [MMRN1_MOUSE]	B2RPV6	0.24925	0.603365	0.410027	-1.28621	0.0117228	0	0
Ig heavy chain V region M603 OS=Mus musculus PE=1 SV=1 - [HVM20_MOUSE]	P01789	0.384503	0.4151	0.223987	-2.15851	0.299421	0	0.299421		Proteasome subunit alpha type-3 OS=Mus musculus GN=Psma3 PE=1 SV=3 - [PSA3_MOUSE]	O70435	0.0430586	1.36594	0.226781	-2.14063	0.146733	0	0.146733		Alpha-1-antitrypsin 1-2 OS=Mus musculus GN=Serpina1b PE=1 SV=2 - [A1AT2_MOUSE]	P22599	0.340618	0.467733	0.281267	-1.82999	0.486875	0.188733	0.486875			Fermitin family homolog 3 OS=Mus musculus GN=Fermt3 PE=1 SV=1 - [URP2_MOUSE]	Q8K1B8	0.183004	0.73754	0.392967	-1.34752	0.0598801	0.145637	0.145637		Fermitin family homolog 3 OS=Mus musculus GN=Fermt3 PE=1 SV=1 - [URP2_MOUSE]	Q8K1B8	0.327686	0.484542	0.390962	-1.3549	0.0598801	0.150101	0.150101
Properdin OS=Mus musculus GN=Cfp PE=2 SV=2 - [PROP_MOUSE]	P11680	0.0121938	1.91386	0.201451	-2.3115	0.677615	0.137552	0.677615		Tubulin beta-5 chain OS=Mus musculus GN=Tubb5 PE=1 SV=1 - [TBB5_MOUSE]	P99024	0.0416514	1.38037	0.225004	-2.15198	0.184844	0	0.184844		Ig heavy chain V-III region J606 OS=Mus musculus PE=1 SV=1 - [HVM32_MOUSE]	P01801	0.481003	0.317852	0.279186	-1.8407	1.10348	0.677341	1.10348			Serum paraoxonase/arylesterase 1 OS=Mus musculus GN=Pon1 PE=1 SV=2 - [PON1_MOUSE]	P52430	0.44421	0.352412	0.374091	-1.41854	0	0.0858878	0.0858878		Pigment epithelium-derived factor OS=Mus musculus GN=Serpinf1 PE=1 SV=2 - [PEDF_MOUSE]	P97298	0.111078	0.954373	0.389275	-1.36114	0.0345099	0.122775	0.122775
Lysozyme C-2 OS=Mus musculus GN=Lyz2 PE=1 SV=2 - [LYZ2_MOUSE]	P08905	0.0637514	1.19551	0.1938	-2.36736	0.249746	0	0.249746		Ig heavy chain V region J539 OS=Mus musculus PE=1 SV=1 - [HVM40_MOUSE]	P01810	0.356408	0.448053	0.220053	-2.18408	0.689023	0.269467	0.689023		Complement C1s-B subcomponent OS=Mus musculus GN=C1sb PE=2 SV=1 - [CS1B_MOUSE]	Q8CFG8	0.396349	0.401922	0.270221	-1.88779	0.641079	0.282824	0.641079			Isocitrate dehydrogenase [NADP] cytoplasmic OS=Mus musculus GN=Idh1 PE=1 SV=2 - [IDHC_MOUSE]	O88844	0.220908	0.655788	0.371435	-1.42882	0	0.173515	0.173515		Alpha-2-HS-glycoprotein OS=Mus musculus GN=Ahsg PE=1 SV=1 - [FETUA_MOUSE]	P29699	0.109934	0.958869	0.365337	-1.4527	0	0.164678	0.164678
Fructose-bisphosphate aldolase A OS=Mus musculus GN=Aldoa PE=1 SV=2 - [ALDOA_MOUSE]	P05064	0.0327484	1.48481	0.190896	-2.38914	0.211063	0	0.211063		Immunoglobulin J chain OS=Mus musculus GN=Jchain PE=1 SV=4 - [IGJ_MOUSE]	P01592	0.198117	0.703079	0.216966	-2.20446	0.831682	0.198062	0.831682		Lysozyme C-2 OS=Mus musculus GN=Lyz2 PE=1 SV=2 - [LYZ2_MOUSE]	P08905	0.0618586	1.2086	0.252485	-1.98573	0.249746	0	0.249746			Tubulin alpha-1C chain OS=Mus musculus GN=Tuba1c PE=1 SV=1 - [TBA1C_MOUSE]	P68373	0.36457	0.438219	0.352736	-1.50334	0.0783682	0.202835	0.202835		Secreted phosphoprotein 24 OS=Mus musculus GN=Spp2 PE=1 SV=2 - [SPP24_MOUSE]	Q8K1I3	0.322801	0.491065	0.350297	-1.51335	0	0.112513	0.112513
Tubulin beta-5 chain OS=Mus musculus GN=Tubb5 PE=1 SV=1 - [TBB5_MOUSE]	P99024	0.0264058	1.5783	0.164898	-2.60035	0.184844	0	0.184844		Ig heavy chain V region M603 OS=Mus musculus PE=1 SV=1 - [HVM20_MOUSE]	P01789	0.325662	0.487233	0.170875	-2.54899	0.299421	0	0.299421		Ig heavy chain V region M603 OS=Mus musculus PE=1 SV=1 - [HVM20_MOUSE]	P01789	0.426792	0.369784	0.248876	-2.0065	0.299421	0	0.299421			Ezrin OS=Mus musculus GN=Ezr PE=1 SV=3 - [EZRI_MOUSE]	P26040	0.231517	0.635418	0.330376	-1.59782	0	0.187874	0.187874		Vitamin D-binding protein OS=Mus musculus GN=Gc PE=1 SV=2 - [VTDB_MOUSE]	P21614	0.135587	0.867781	0.347581	-1.52458	0	0.0897168	0.0897168
Immunoglobulin J chain OS=Mus musculus GN=Jchain PE=1 SV=4 - [IGJ_MOUSE]	P01592	0.182807	0.738008	0.105973	-3.23823	0.831682	0.132865	0.831682		Platelet factor 4 OS=Mus musculus GN=Pf4 PE=1 SV=1 - [PLF4_MOUSE]	Q9Z126	0.000262942	3.58014	0.139983	-2.83668	0.443281	0	0.443281		Ig heavy chain V region 5-84 OS=Mus musculus PE=1 SV=1 - [HVM54_MOUSE]	P18525	0.0419527	1.37724	0.114194	-3.13044	0.6499	0	0.6499			Ig heavy chain V region 36-65 OS=Mus musculus PE=1 SV=1 - [HVM03_MOUSE]	P01747	0.58408	0.233528	0.305057	-1.71285	0.367413	0.456454	0.456454		Isocitrate dehydrogenase [NADP] cytoplasmic OS=Mus musculus GN=Idh1 PE=1 SV=2 - [IDHC_MOUSE]	O88844	0.143348	0.843607	0.341366	-1.55061	0	0.192503	0.192503
Platelet factor 4 OS=Mus musculus GN=Pf4 PE=1 SV=1 - [PLF4_MOUSE]	Q9Z126	0.019542	1.70903	0.0821748	-3.60516	0.443281	0	0.443281		Alpha-1-antitrypsin 1-2 OS=Mus musculus GN=Serpina1b PE=1 SV=2 - [A1AT2_MOUSE]	P22599	0.0346673	1.46008	0.116925	-3.09635	0.486875	0	0.486875		Platelet factor 4 OS=Mus musculus GN=Pf4 PE=1 SV=1 - [PLF4_MOUSE]	Q9Z126	0.00240558	2.61878	0.100816	-3.3102	0.443281	0	0.443281			Ig heavy chain V region MOPC 104E OS=Mus musculus PE=1 SV=1 - [HVM12_MOUSE]	P01756	0.498611	0.302238	0.240697	-2.05471	0.614458	1.22899	1.22899		Lactotransferrin OS=Mus musculus GN=Ltf PE=1 SV=4 - [TRFL_MOUSE]	P08071	0.0800958	1.09639	0.305232	-1.71202	0.0456233	0.148874	0.148874
Ig heavy chain V region 5-84 OS=Mus musculus PE=1 SV=1 - [HVM54_MOUSE]	P18525	0.0493469	1.30674	0.0682111	-3.87385	0.6499	0	0.6499		Ig heavy chain V region 5-84 OS=Mus musculus PE=1 SV=1 - [HVM54_MOUSE]	P18525	0.0334603	1.47547	0.0930107	-3.42646	0.6499	0	0.6499		Immunoglobulin J chain OS=Mus musculus GN=Jchain PE=1 SV=4 - [IGJ_MOUSE]	P01592	0.00245567	2.60983	0.0604401	-4.04835	0.831682	0	0.831682			Protein S100-A9 OS=Mus musculus GN=S100a9 PE=1 SV=3 - [S10A9_MOUSE]	P31725	0.0894932	1.04821	0.160777	-2.63687	0	0.378682	0.378682		Ig heavy chain V region 6,96 OS=Mus musculus PE=4 SV=1 - [HVM57_MOUSE]	P18528	0.593208	0.226793	0.280859	-1.83208	0.621839	0.873736	0.873736
Ig kappa chain V-III region PC 7940 OS=Mus musculus PE=1 SV=1 - [KV3AK_MOUSE]	P01672	0.00333926	2.47635	0.0371596	-4.75012	1.17421	0	1.17421		Ig kappa chain V-III region PC 7175 OS=Mus musculus PE=1 SV=1 - [KV3AJ_MOUSE]	P01671	0.00148392	2.82859	0.0585101	-4.09517	0.968249	0	0.968249		Ig kappa chain V-III region PC 7940 OS=Mus musculus PE=1 SV=1 - [KV3AK_MOUSE]	P01672	0.00632062	2.19924	0.0454659	-4.45907	1.17421	0	1.17421			Ig heavy chain Mem5 (Fragment) OS=Mus musculus PE=1 SV=1 - [HVM63_MOUSE]	P84751	0.497669	0.303059	0.156592	-2.67492	0.30859	0.699832	0.699832		Ig heavy chain V-III region A4 OS=Mus musculus PE=1 SV=1 - [HVM27_MOUSE]	P01796	0.46084	0.33645	0.17627	-2.50414	0	0.435032	0.435032
Ig kappa chain V-III region PC 7175 OS=Mus musculus PE=1 SV=1 - [KV3AJ_MOUSE]	P01671	0.0782186	1.10669	0.0327323	-4.93314	0.968249	0	0.968249		Ig kappa chain V-VI region NQ5-61,1,2 OS=Mus musculus PE=2 SV=1 - [KV6A8_MOUSE]	P04942	0.0251345	1.59973	0.0465534	-4.42497	0.85894	0	0.85894		Ig kappa chain V-VI region NQ5-61,1,2 OS=Mus musculus PE=2 SV=1 - [KV6A8_MOUSE]	P04942	0.00723719	2.14043	0.0454492	-4.4596	0.85894	0	0.85894			Lysozyme C-2 OS=Mus musculus GN=Lyz2 PE=1 SV=2 - [LYZ2_MOUSE]	P08905	0.0796966	1.09856	0.130748	-2.93514	0	0.363955	0.363955		Ig heavy chain Mem5 (Fragment) OS=Mus musculus PE=1 SV=1 - [HVM63_MOUSE]	P84751	0.35993	0.443782	0.128889	-2.9558	0.30859	0.926407	0.926407
Ig kappa chain V-VI region NQ5-61,1,2 OS=Mus musculus PE=2 SV=1 - [KV6A8_MOUSE]	P04942	0.00380706	2.41941	0.0297188	-5.07248	0.85894	0	0.85894		Ig kappa chain V-III region PC 7940 OS=Mus musculus PE=1 SV=1 - [KV3AK_MOUSE]	P01672	0.00684826	2.16442	0.0270408	-5.20872	1.17421	0	1.17421		Ig kappa chain V-III region PC 7175 OS=Mus musculus PE=1 SV=1 - [KV3AJ_MOUSE]	P01671	0.00235706	2.62763	0.0427672	-4.54735	0.968249	0	0.968249			Ig heavy chain V-III region A4 OS=Mus musculus PE=1 SV=1 - [HVM27_MOUSE]	P01796	0.457101	0.339988	0.12576	-2.99126	0	0.804293	0.804293		Ig kappa chain V-III region PC 6684 OS=Mus musculus PE=1 SV=1 - [KV3AI_MOUSE]	P01670	0.499212	0.301715	0.127713	-2.96902	0	0.792768	0.792768

## Sheet: HEP-ESIONPs comparison
Accession	Description	HEP0-IONP	HEP8-IONP	HEP24-IONP	HEP0-IONP - HEP8-IONP	HEP0-IONP - HEP24-IONP	HEP8-IONP - HEP24-IONP		Accession	Description	HEP24-IONP	HEP8-IONP	HEP0-IONP	HEP24-IONP - HEP8-IONP	HEP24-IONP - HEP0-IONP	HEP8-IONP - HEP0-IONP
P01837	Ig kappa chain C region OS=Mus musculus PE=1 SV=1 - [IGKC_MOUSE]	5.84676	6.15362	5.86944	0.950135	-0.0226783	0.284173		P01837	Ig kappa chain C region OS=Mus musculus PE=1 SV=1 - [IGKC_MOUSE]	5.86944	6.15362	5.84676	-0.284173	0.0226783	0.306852		MORE IN HEP 0 than HEP8-ESIONP						MORE IN HEP 0 than HEP24-ESIONP
P01872	Ig mu chain C region OS=Mus musculus GN=Ighm PE=1 SV=2 - [IGHM_MOUSE]	4.84836	4.72699	4.42651	0.121369	0.421844	0.300474		P01872	Ig mu chain C region OS=Mus musculus GN=Ighm PE=1 SV=2 - [IGHM_MOUSE]	4.42651	4.72699	4.84836	-0.300474	-0.421844	-0.121369
P01644	Ig kappa chain V-V region HP R16.7 OS=Mus musculus PE=1 SV=1 - [KV5AB_MOUSE]	2.28805	1.45503	2.09156	0.833025	0.196495	-0.63653		P01644	Ig kappa chain V-V region HP R16.7 OS=Mus musculus PE=1 SV=1 - [KV5AB_MOUSE]	2.09156	1.45503	2.28805	0.63653	-0.196495	-0.833025		Ig kappa chain V-V region HP 124E1 OS=Mus musculus PE=1 SV=1 - [KV5AE_MOUSE]						Ig kappa chain V-II region 2S1,3 OS=Mus musculus PE=1 SV=1 - [KV2A4_MOUSE]
P98086	Complement C1q subcomponent subunit A OS=Mus musculus GN=C1qa PE=1 SV=2 - [C1QA_MOUSE]	2.28261	2.49811	2.58904	-0.215494	-0.306429	-0.0909352		P98086	Complement C1q subcomponent subunit A OS=Mus musculus GN=C1qa PE=1 SV=2 - [C1QA_MOUSE]	2.58904	2.49811	2.28261	0.0909352	0.306429	0.215494		Alpha-1-antitrypsin 1-2 OS=Mus musculus GN=Serpina1b PE=1 SV=2 - [A1AT2_MOUSE]						Ig heavy chain V-III region J606 OS=Mus musculus PE=1 SV=1 - [HVM32_MOUSE]
P06330	Ig heavy chain V region AC38 205.12 OS=Mus musculus PE=1 SV=1 - [HVM51_MOUSE]	2.24419	1.91012	2.21812	0.334073	0.0260714	-0.308001		P06330	Ig heavy chain V region AC38 205.12 OS=Mus musculus PE=1 SV=1 - [HVM51_MOUSE]	2.21812	1.91012	2.24419	0.308001	-0.0260714	-0.334073		Ferritin light chain 1 OS=Mus musculus GN=Ftl1 PE=1 SV=2 - [FRIL1_MOUSE]						Ig kappa chain V-III region ABPC 22/PC 9245 OS=Mus musculus PE=1 SV=1 - [KV3AA_MOUSE]
Q9ESB3	Histidine-rich glycoprotein OS=Mus musculus GN=Hrg PE=1 SV=2 - [HRG_MOUSE]	2.21306	2.91337	2.40876	-0.700306	-0.195699	0.504607		Q9ESB3	Histidine-rich glycoprotein OS=Mus musculus GN=Hrg PE=1 SV=2 - [HRG_MOUSE]	2.40876	2.91337	2.21306	-0.504607	0.195699	0.700306		Ig heavy chain V-III region J606 OS=Mus musculus PE=1 SV=1 - [HVM32_MOUSE]						Ferritin light chain 1 OS=Mus musculus GN=Ftl1 PE=1 SV=2 - [FRIL1_MOUSE]
P01878	Ig alpha chain C region OS=Mus musculus PE=1 SV=1 - [IGHA_MOUSE]	1.82763	1.46938	1.57957	0.358255	0.248058	-0.110197		P01878	Ig alpha chain C region OS=Mus musculus PE=1 SV=1 - [IGHA_MOUSE]	1.57957	1.46938	1.82763	0.110197	-0.248058	-0.358255		Proteasome subunit alpha type-2 OS=Mus musculus GN=Psma2 PE=1 SV=3 - [PSA2_MOUSE]						CD9 antigen OS=Mus musculus GN=Cd9 PE=1 SV=2 - [CD9_MOUSE]
P01647	Ig kappa chain V-V region HP 124E1 OS=Mus musculus PE=1 SV=1 - [KV5AE_MOUSE]	1.78071	0.44725	1.77221	1.33346	0.00850179	-1.32496		P01647	Ig kappa chain V-V region HP 124E1 OS=Mus musculus PE=1 SV=1 - [KV5AE_MOUSE]	1.77221	0.44725	1.78071	1.32496	-0.00850179	-1.33346		Ig heavy chain V region J539 OS=Mus musculus PE=1 SV=1 - [HVM40_MOUSE]						Apolipoprotein A-IV OS=Mus musculus GN=Apoa4 PE=1 SV=3 - [APOA4_MOUSE]
P01864	Ig gamma-2A chain C region secreted form OS=Mus musculus PE=1 SV=1 - [GCAB_MOUSE]	1.67637	1.6578	1.82631	0.01857	-0.149939	-0.168509		P01864	Ig gamma-2A chain C region secreted form OS=Mus musculus PE=1 SV=1 - [GCAB_MOUSE]	1.82631	1.6578	1.67637	0.168509	0.149939	-0.01857		Ig kappa chain V-II region 2S1,3 OS=Mus musculus PE=1 SV=1 - [KV2A4_MOUSE]						Complement C1s-B subcomponent OS=Mus musculus GN=C1sb PE=2 SV=1 - [CS1B_MOUSE]
P01844	Ig lambda-2 chain C region OS=Mus musculus GN=Iglc2 PE=1 SV=1 - [LAC2_MOUSE]	1.64854	1.51842	1.40068	0.130127	0.247863	0.117736		P01844	Ig lambda-2 chain C region OS=Mus musculus GN=Iglc2 PE=1 SV=1 - [LAC2_MOUSE]	1.40068	1.51842	1.64854	-0.117736	-0.247863	-0.130127		Proteasome subunit alpha type-5 OS=Mus musculus GN=Psma5 PE=1 SV=1 - [PSA5_MOUSE]						Proteasome subunit alpha type-2 OS=Mus musculus GN=Psma2 PE=1 SV=3 - [PSA2_MOUSE]
P32261	Antithrombin-III OS=Mus musculus GN=Serpinc1 PE=1 SV=1 - [ANT3_MOUSE]	1.55181	1.70243	1.65228	-0.150615	-0.100472	0.050143		P32261	Antithrombin-III OS=Mus musculus GN=Serpinc1 PE=1 SV=1 - [ANT3_MOUSE]	1.65228	1.70243	1.55181	-0.050143	0.100472	0.150615		Ig kappa chain V-VI region NQ2-17,4,1 OS=Mus musculus PE=2 SV=1 - [KV6A6_MOUSE]						Alpha-1-antitrypsin 1-2 OS=Mus musculus GN=Serpina1b PE=1 SV=2 - [A1AT2_MOUSE]
P01801	Ig heavy chain V-III region J606 OS=Mus musculus PE=1 SV=1 - [HVM32_MOUSE]	1.53073	0.69626	0.677341	0.834471	0.85339	0.0189191		P01801	Ig heavy chain V-III region J606 OS=Mus musculus PE=1 SV=1 - [HVM32_MOUSE]	0.677341	0.69626	1.53073	-0.0189191	-0.85339	-0.834471		Proteasome subunit beta type-10 OS=Mus musculus GN=Psmb10 PE=1 SV=1 - [PSB10_MOUSE]						Keratin, type II cytoskeletal 5 OS=Mus musculus GN=Krt5 PE=1 SV=1 - [K2C5_MOUSE]
P18527	Ig heavy chain V region 914 OS=Mus musculus PE=1 SV=1 - [HVM56_MOUSE]	1.51584	1.79287	1.51595	-0.277032	-0.000108723	0.276924		P18527	Ig heavy chain V region 914 OS=Mus musculus PE=1 SV=1 - [HVM56_MOUSE]	1.51595	1.79287	1.51584	-0.276924	0.000108723	0.277032		Complement C1s-B subcomponent OS=Mus musculus GN=C1sb PE=2 SV=1 - [CS1B_MOUSE]						Hemoglobin subunit beta-2 OS=Mus musculus GN=Hbb-b2 PE=1 SV=2 - [HBB2_MOUSE]
P07724	Serum albumin OS=Mus musculus GN=Alb PE=1 SV=3 - [ALBU_MOUSE]	1.48726	1.33728	1.24746	0.149988	0.239805	0.0898174		P07724	Serum albumin OS=Mus musculus GN=Alb PE=1 SV=3 - [ALBU_MOUSE]	1.24746	1.33728	1.48726	-0.0898174	-0.239805	-0.149988		Proteasome subunit beta type-3 OS=Mus musculus GN=Psmb3 PE=1 SV=1 - [PSB3_MOUSE]						Profilin-1 OS=Mus musculus GN=Pfn1 PE=1 SV=2 - [PROF1_MOUSE]
P01635	Ig kappa chain V-V region K2 (Fragment) OS=Mus musculus PE=1 SV=1 - [KV5A3_MOUSE]	1.47472	1.48096	1.14664	-0.00624186	0.328073	0.334314		P01635	Ig kappa chain V-V region K2 (Fragment) OS=Mus musculus PE=1 SV=1 - [KV5A3_MOUSE]	1.14664	1.48096	1.47472	-0.334314	-0.328073	0.00624186		Proteasome subunit beta type-2 OS=Mus musculus GN=Psmb2 PE=1 SV=1 - [PSB2_MOUSE]						Ig kappa chain V-VI region NQ2-17,4,1 OS=Mus musculus PE=2 SV=1 - [KV6A6_MOUSE]
Q00623	Apolipoprotein A-I OS=Mus musculus GN=Apoa1 PE=1 SV=2 - [APOA1_MOUSE]	1.41461	1.46041	1.41597	-0.0458065	-0.00136322	0.0444433		Q00623	Apolipoprotein A-I OS=Mus musculus GN=Apoa1 PE=1 SV=2 - [APOA1_MOUSE]	1.41597	1.46041	1.41461	-0.0444433	0.00136322	0.0458065		Proteasome subunit alpha type-3 OS=Mus musculus GN=Psma3 PE=1 SV=3 - [PSA3_MOUSE]						Keratin, type I cytoskeletal 14 OS=Mus musculus GN=Krt14 PE=1 SV=2 - [K1C14_MOUSE]
P01863	Ig gamma-2A chain C region, A allele OS=Mus musculus GN=Ighg PE=1 SV=1 - [GCAA_MOUSE]	1.37827	1.37578	1.37516	0.00249395	0.00311295	0.000618999		P01863	Ig gamma-2A chain C region, A allele OS=Mus musculus GN=Ighg PE=1 SV=1 - [GCAA_MOUSE]	1.37516	1.37578	1.37827	-0.000618999	-0.00311295	-0.00249395		Polymeric immunoglobulin receptor OS=Mus musculus GN=Pigr PE=1 SV=1 - [PIGR_MOUSE]						Polymeric immunoglobulin receptor OS=Mus musculus GN=Pigr PE=1 SV=1 - [PIGR_MOUSE]
P01639	Ig kappa chain V-V region MOPC 41 OS=Mus musculus GN=Gm5571 PE=1 SV=1 - [KV5A7_MOUSE]	1.33962	1.41475	1.27208	-0.0751253	0.0675395	0.142665		P01639	Ig kappa chain V-V region MOPC 41 OS=Mus musculus GN=Gm5571 PE=1 SV=1 - [KV5A7_MOUSE]	1.27208	1.41475	1.33962	-0.142665	-0.0675395	0.0751253		Keratin, type II cytoskeletal 5 OS=Mus musculus GN=Krt5 PE=1 SV=1 - [K2C5_MOUSE]						Ig lambda-1 chain V region OS=Mus musculus PE=1 SV=2 - [LV1A_MOUSE]
P01843	Ig lambda-1 chain C region OS=Mus musculus PE=1 SV=1 - [LAC1_MOUSE]	1.31169	1.10576	0.851204	0.205921	0.460481	0.254561		P01843	Ig lambda-1 chain C region OS=Mus musculus PE=1 SV=1 - [LAC1_MOUSE]	0.851204	1.10576	1.31169	-0.254561	-0.460481	-0.205921		Ig lambda-1 chain V region OS=Mus musculus PE=1 SV=2 - [LV1A_MOUSE]						C-reactive protein OS=Mus musculus GN=Crp PE=1 SV=2 - [CRP_MOUSE]
P39039	Mannose-binding protein A OS=Mus musculus GN=Mbl1 PE=1 SV=1 - [MBL1_MOUSE]	1.28991	1.45119	1.43721	-0.161274	-0.147299	0.0139744		P39039	Mannose-binding protein A OS=Mus musculus GN=Mbl1 PE=1 SV=1 - [MBL1_MOUSE]	1.43721	1.45119	1.28991	-0.0139744	0.147299	0.161274		Proteasome subunit beta type-1 OS=Mus musculus GN=Psmb1 PE=1 SV=1 - [PSB1_MOUSE]
P01631	Ig kappa chain V-II region 26-10 OS=Mus musculus PE=1 SV=1 - [KV2A7_MOUSE]	1.2224	1.30013	1.49656	-0.0777259	-0.274152	-0.196426		P01631	Ig kappa chain V-II region 26-10 OS=Mus musculus PE=1 SV=1 - [KV2A7_MOUSE]	1.49656	1.30013	1.2224	0.196426	0.274152	0.0777259		Profilin-1 OS=Mus musculus GN=Pfn1 PE=1 SV=2 - [PROF1_MOUSE]
P01654	Ig kappa chain V-III region PC 2880/PC 1229 OS=Mus musculus PE=1 SV=1 - [KV3A1_MOUSE]	1.2007	1.01399	1.38825	0.18671	-0.187557	-0.374267		P01654	Ig kappa chain V-III region PC 2880/PC 1229 OS=Mus musculus PE=1 SV=1 - [KV3A1_MOUSE]	1.38825	1.01399	1.2007	0.374267	0.187557	-0.18671		Proteasome subunit beta type-9 OS=Mus musculus bactrianus GN=Psmb9 PE=1 SV=1 - [PSB9_MUSMB]
P01790	Ig heavy chain V region M511 OS=Mus musculus PE=1 SV=1 - [HVM21_MOUSE]	1.15734	1.03811	0.99313	0.119226	0.164209	0.0449833		P01790	Ig heavy chain V region M511 OS=Mus musculus PE=1 SV=1 - [HVM21_MOUSE]	0.99313	1.03811	1.15734	-0.0449833	-0.164209	-0.119226		Complement C5 OS=Mus musculus GN=C5 PE=1 SV=2 - [CO5_MOUSE]
P14106	Complement C1q subcomponent subunit B OS=Mus musculus GN=C1qb PE=1 SV=2 - [C1QB_MOUSE]	1.08645	1.17009	1.12118	-0.083636	-0.0347308	0.0489053		P14106	Complement C1q subcomponent subunit B OS=Mus musculus GN=C1qb PE=1 SV=2 - [C1QB_MOUSE]	1.12118	1.17009	1.08645	-0.0489053	0.0347308	0.083636		Proteasome subunit alpha type-1 OS=Mus musculus GN=Psma1 PE=1 SV=1 - [PSA1_MOUSE]
Q02105	Complement C1q subcomponent subunit C OS=Mus musculus GN=C1qc PE=1 SV=2 - [C1QC_MOUSE]	1.04849	1.03772	1.13722	0.0107717	-0.0887247	-0.0994964		Q02105	Complement C1q subcomponent subunit C OS=Mus musculus GN=C1qc PE=1 SV=2 - [C1QC_MOUSE]	1.13722	1.03772	1.04849	0.0994964	0.0887247	-0.0107717
P01638	Ig kappa chain V-V region L6 (Fragment) OS=Mus musculus PE=4 SV=1 - [KV5A6_MOUSE]	1.01858	1.31601	1.04412	-0.297426	-0.0255313	0.271894		P01638	Ig kappa chain V-V region L6 (Fragment) OS=Mus musculus PE=4 SV=1 - [KV5A6_MOUSE]	1.04412	1.31601	1.01858	-0.271894	0.0255313	0.297426
P29788	Vitronectin OS=Mus musculus GN=Vtn PE=1 SV=2 - [VTNC_MOUSE]	0.969305	1.32758	1.11667	-0.358275	-0.147366	0.210909		P29788	Vitronectin OS=Mus musculus GN=Vtn PE=1 SV=2 - [VTNC_MOUSE]	1.11667	1.32758	0.969305	-0.210909	0.147366	0.358275		MORE IN HEP 8 than HEP0-ESIONP						MORE IN HEP 24 than HEP0-ESIONP
Q8CG14	Complement C1s-A subcomponent OS=Mus musculus GN=C1sa PE=2 SV=2 - [CS1A_MOUSE]	0.95626	0.994782	1.078	-0.0385223	-0.121739	-0.0832167		Q8CG14	Complement C1s-A subcomponent OS=Mus musculus GN=C1sa PE=2 SV=2 - [CS1A_MOUSE]	1.078	0.994782	0.95626	0.0832167	0.121739	0.0385223
P97290	Plasma protease C1 inhibitor OS=Mus musculus GN=Serping1 PE=1 SV=3 - [IC1_MOUSE]	0.951847	0.767974	0.656647	0.183872	0.2952	0.111328		P97290	Plasma protease C1 inhibitor OS=Mus musculus GN=Serping1 PE=1 SV=3 - [IC1_MOUSE]	0.656647	0.767974	0.951847	-0.111328	-0.2952	-0.183872		Immunoglobulin J chain OS=Mus musculus GN=Jchain PE=1 SV=4 - [IGJ_MOUSE]						Thrombospondin-1 OS=Mus musculus GN=Thbs1 PE=1 SV=1 - [TSP1_MOUSE]
P02088	Hemoglobin subunit beta-1 OS=Mus musculus GN=Hbb-b1 PE=1 SV=2 - [HBB1_MOUSE]	0.908122	0.951033	1.21431	-0.0429115	-0.306189	-0.263278		P02088	Hemoglobin subunit beta-1 OS=Mus musculus GN=Hbb-b1 PE=1 SV=2 - [HBB1_MOUSE]	1.21431	0.951033	0.908122	0.263278	0.306189	0.0429115		Proteoglycan 4 OS=Mus musculus GN=Prg4 PE=1 SV=2 - [PRG4_MOUSE]						Phosphatidylinositol-glycan-specific phospholipase D OS=Mus musculus GN=Gpld1 PE=1 SV=1 - [PHLD_MOUSE]
P01668	Ig kappa chain V-III region PC 7210 OS=Mus musculus PE=1 SV=1 - [KV3AG_MOUSE]	0.906556	0.826966	1.31914	0.0795902	-0.412584	-0.492174		P01668	Ig kappa chain V-III region PC 7210 OS=Mus musculus PE=1 SV=1 - [KV3AG_MOUSE]	1.31914	0.826966	0.906556	0.492174	0.412584	-0.0795902		Alpha-actinin-1 OS=Mus musculus GN=Actn1 PE=1 SV=1 - [ACTN1_MOUSE]						Inter-alpha-trypsin inhibitor heavy chain H2 OS=Mus musculus GN=Itih2 PE=1 SV=1 - [ITIH2_MOUSE]
P01753	Ig heavy chain V region 186-1 OS=Mus musculus PE=4 SV=2 - [HVM09_MOUSE]	0.902393	0.923787	0.966342	-0.0213939	-0.0639487	-0.0425548		P01753	Ig heavy chain V region 186-1 OS=Mus musculus PE=4 SV=2 - [HVM09_MOUSE]	0.966342	0.923787	0.902393	0.0425548	0.0639487	0.0213939		Coagulation factor XI OS=Mus musculus GN=F11 PE=2 SV=2 - [FA11_MOUSE]						Transforming growth factor-beta-induced protein ig-h3 OS=Mus musculus GN=Tgfbi PE=1 SV=1 - [BGH3_MOUSE]
P01636	Ig kappa chain V-V region MOPC 149 OS=Mus musculus PE=1 SV=1 - [KV5A4_MOUSE]	0.900512	1.17805	1.36293	-0.277543	-0.462413	-0.18487		P01636	Ig kappa chain V-V region MOPC 149 OS=Mus musculus PE=1 SV=1 - [KV5A4_MOUSE]	1.36293	1.17805	0.900512	0.18487	0.462413	0.277543		Kininogen-1 OS=Mus musculus GN=Kng1 PE=1 SV=1 - [KNG1_MOUSE]						Multimerin-1 OS=Mus musculus GN=Mmrn1 PE=1 SV=2 - [MMRN1_MOUSE]
P07759	Serine protease inhibitor A3K OS=Mus musculus GN=Serpina3k PE=1 SV=2 - [SPA3K_MOUSE]	0.897492	1.04527	1.14995	-0.147782	-0.252458	-0.104676		P07759	Serine protease inhibitor A3K OS=Mus musculus GN=Serpina3k PE=1 SV=2 - [SPA3K_MOUSE]	1.14995	1.04527	0.897492	0.104676	0.252458	0.147782		Fermitin family homolog 3 OS=Mus musculus GN=Fermt3 PE=1 SV=1 - [URP2_MOUSE]						Fermitin family homolog 3 OS=Mus musculus GN=Fermt3 PE=1 SV=1 - [URP2_MOUSE]
Q61838	Pregnancy zone protein OS=Mus musculus GN=Pzp PE=1 SV=3 - [PZP_MOUSE]	0.890307	0.747728	0.73008	0.142579	0.160227	0.0176477		Q61838	Pregnancy zone protein OS=Mus musculus GN=Pzp PE=1 SV=3 - [PZP_MOUSE]	0.73008	0.747728	0.890307	-0.0176477	-0.160227	-0.142579		Serum paraoxonase/arylesterase 1 OS=Mus musculus GN=Pon1 PE=1 SV=2 - [PON1_MOUSE]						Pigment epithelium-derived factor OS=Mus musculus GN=Serpinf1 PE=1 SV=2 - [PEDF_MOUSE]
P18531	Ig heavy chain V region 3-6 OS=Mus musculus GN=Ighv3-6 PE=1 SV=1 - [HVM60_MOUSE]	0.88824	0.909299	0.818662	-0.0210584	0.0695786	0.090637		P18531	Ig heavy chain V region 3-6 OS=Mus musculus GN=Ighv3-6 PE=1 SV=1 - [HVM60_MOUSE]	0.818662	0.909299	0.88824	-0.090637	-0.0695786	0.0210584		Isocitrate dehydrogenase [NADP] cytoplasmic OS=Mus musculus GN=Idh1 PE=1 SV=2 - [IDHC_MOUSE]						Alpha-2-HS-glycoprotein OS=Mus musculus GN=Ahsg PE=1 SV=1 - [FETUA_MOUSE]
P01750	Ig heavy chain V region 102 OS=Mus musculus PE=1 SV=1 - [HVM06_MOUSE]	0.828009	0.837402	1.03551	-0.00939269	-0.207499	-0.198106		P01750	Ig heavy chain V region 102 OS=Mus musculus PE=1 SV=1 - [HVM06_MOUSE]	1.03551	0.837402	0.828009	0.198106	0.207499	0.00939269		Tubulin alpha-1C chain OS=Mus musculus GN=Tuba1c PE=1 SV=1 - [TBA1C_MOUSE]						Secreted phosphoprotein 24 OS=Mus musculus GN=Spp2 PE=1 SV=2 - [SPP24_MOUSE]
P01868	Ig gamma-1 chain C region secreted form OS=Mus musculus GN=Ighg1 PE=1 SV=1 - [IGHG1_MOUSE]	0.823075	0.793887	0.637975	0.0291879	0.1851	0.155912		P01868	Ig gamma-1 chain C region secreted form OS=Mus musculus GN=Ighg1 PE=1 SV=1 - [IGHG1_MOUSE]	0.637975	0.793887	0.823075	-0.155912	-0.1851	-0.0291879		Ezrin OS=Mus musculus GN=Ezr PE=1 SV=3 - [EZRI_MOUSE]						Vitamin D-binding protein OS=Mus musculus GN=Gc PE=1 SV=2 - [VTDB_MOUSE]
P03987	Ig gamma-3 chain C region OS=Mus musculus PE=1 SV=2 - [IGHG3_MOUSE]	0.818355	1.1967	0.820163	-0.378343	-0.00180853	0.376534		P03987	Ig gamma-3 chain C region OS=Mus musculus PE=1 SV=2 - [IGHG3_MOUSE]	0.820163	1.1967	0.818355	-0.376534	0.00180853	0.378343		Ig heavy chain V region 36-65 OS=Mus musculus PE=1 SV=1 - [HVM03_MOUSE]						Isocitrate dehydrogenase [NADP] cytoplasmic OS=Mus musculus GN=Idh1 PE=1 SV=2 - [IDHC_MOUSE]
P01786	Ig heavy chain V region MOPC 47A OS=Mus musculus PE=1 SV=1 - [HVM17_MOUSE]	0.759594	0.798768	0.741224	-0.0391742	0.0183697	0.0575438		P01786	Ig heavy chain V region MOPC 47A OS=Mus musculus PE=1 SV=1 - [HVM17_MOUSE]	0.741224	0.798768	0.759594	-0.0575438	-0.0183697	0.0391742		Ig heavy chain V region MOPC 104E OS=Mus musculus PE=1 SV=1 - [HVM12_MOUSE]						Lactotransferrin OS=Mus musculus GN=Ltf PE=1 SV=4 - [TRFL_MOUSE]
P07309	Transthyretin OS=Mus musculus GN=Ttr PE=1 SV=1 - [TTHY_MOUSE]	0.725873	0.954904	0.734533	-0.229031	-0.00865997	0.220371		P07309	Transthyretin OS=Mus musculus GN=Ttr PE=1 SV=1 - [TTHY_MOUSE]	0.734533	0.954904	0.725873	-0.220371	0.00865997	0.229031		Protein S100-A9 OS=Mus musculus GN=S100a9 PE=1 SV=3 - [S10A9_MOUSE]						Ig heavy chain V region 6,96 OS=Mus musculus PE=4 SV=1 - [HVM57_MOUSE]
P01942	Hemoglobin subunit alpha OS=Mus musculus GN=Hba PE=1 SV=2 - [HBA_MOUSE]	0.706222	0.520893	0.726229	0.185328	-0.0200079	-0.205336		P01942	Hemoglobin subunit alpha OS=Mus musculus GN=Hba PE=1 SV=2 - [HBA_MOUSE]	0.726229	0.520893	0.706222	0.205336	0.0200079	-0.185328		Ig heavy chain Mem5 (Fragment) OS=Mus musculus PE=1 SV=1 - [HVM63_MOUSE]						Ig heavy chain V-III region A4 OS=Mus musculus PE=1 SV=1 - [HVM27_MOUSE]
P01806	Ig heavy chain V region 441 OS=Mus musculus PE=4 SV=1 - [HVM36_MOUSE]	0.70159	0.645931	0.830339	0.0556588	-0.128749	-0.184408		P01806	Ig heavy chain V region 441 OS=Mus musculus PE=4 SV=1 - [HVM36_MOUSE]	0.830339	0.645931	0.70159	0.184408	0.128749	-0.0556588		Lysozyme C-2 OS=Mus musculus GN=Lyz2 PE=1 SV=2 - [LYZ2_MOUSE]						Ig heavy chain Mem5 (Fragment) OS=Mus musculus PE=1 SV=1 - [HVM63_MOUSE]
Q06890	Clusterin OS=Mus musculus GN=Clu PE=1 SV=1 - [CLUS_MOUSE]	0.683994	0.901499	0.953686	-0.217505	-0.269692	-0.0521874		Q06890	Clusterin OS=Mus musculus GN=Clu PE=1 SV=1 - [CLUS_MOUSE]	0.953686	0.901499	0.683994	0.0521874	0.269692	0.217505		Ig heavy chain V-III region A4 OS=Mus musculus PE=1 SV=1 - [HVM27_MOUSE]						Ig kappa chain V-III region PC 6684 OS=Mus musculus PE=1 SV=1 - [KV3AI_MOUSE]
Q9QWK4	CD5 antigen-like OS=Mus musculus GN=Cd5l PE=1 SV=3 - [CD5L_MOUSE]	0.674087	0.479449	0.584267	0.194638	0.0898201	-0.104818		Q9QWK4	CD5 antigen-like OS=Mus musculus GN=Cd5l PE=1 SV=3 - [CD5L_MOUSE]	0.584267	0.479449	0.674087	0.104818	-0.0898201	-0.194638
P01810	Ig heavy chain V region J539 OS=Mus musculus PE=1 SV=1 - [HVM40_MOUSE]	0.670545	0.269467	0.660861	0.401078	0.00968441	-0.391394		P01810	Ig heavy chain V region J539 OS=Mus musculus PE=1 SV=1 - [HVM40_MOUSE]	0.660861	0.269467	0.670545	0.391394	-0.00968441	-0.401078
P01029	Complement C4-B OS=Mus musculus GN=C4b PE=1 SV=3 - [CO4B_MOUSE]	0.651086	0.491649	0.433966	0.159437	0.21712	0.0576833		P01029	Complement C4-B OS=Mus musculus GN=C4b PE=1 SV=3 - [CO4B_MOUSE]	0.433966	0.491649	0.651086	-0.0576833	-0.21712	-0.159437
P01675	Ig kappa chain V-VI region XRPC 44 OS=Mus musculus PE=1 SV=1 - [KV6A1_MOUSE]	0.626333	0.522399	0.508429	0.103935	0.117904	0.0139698		P01675	Ig kappa chain V-VI region XRPC 44 OS=Mus musculus PE=1 SV=1 - [KV6A1_MOUSE]	0.508429	0.522399	0.626333	-0.0139698	-0.117904	-0.103935
P18528	Ig heavy chain V region 6.96 OS=Mus musculus PE=4 SV=1 - [HVM57_MOUSE]	0.621839	0.486186	0.873736	0.135653	-0.251897	-0.38755		P18528	Ig heavy chain V region 6.96 OS=Mus musculus PE=4 SV=1 - [HVM57_MOUSE]	0.873736	0.486186	0.621839	0.38755	0.251897	-0.135653
P01867	Ig gamma-2B chain C region OS=Mus musculus GN=Igh-3 PE=1 SV=3 - [IGG2B_MOUSE]	0.615729	0.532624	0.676812	0.0831048	-0.0610837	-0.144188		P01867	Ig gamma-2B chain C region OS=Mus musculus GN=Igh-3 PE=1 SV=3 - [IGG2B_MOUSE]	0.676812	0.532624	0.615729	0.144188	0.0610837	-0.0831048
P01756	Ig heavy chain V region MOPC 104E OS=Mus musculus PE=1 SV=1 - [HVM12_MOUSE]	0.614458	1.22899	0.601481	-0.614534	0.0129773	0.627511		P01756	Ig heavy chain V region MOPC 104E OS=Mus musculus PE=1 SV=1 - [HVM12_MOUSE]	0.601481	1.22899	0.614458	-0.627511	-0.0129773	0.614534
P01662		0.589826	0.336281	0.18317	0.253546	0.406656	0.15311		P01662	Ig kappa chain V-III region ABPC 22/PC 9245 OS=Mus musculus PE=1 SV=1 - [KV3AA_MOUSE]	0.18317	0.336281	0.589826	-0.15311	-0.406656	-0.253546
P01629	Ig kappa chain V-II region 2S1.3 OS=Mus musculus PE=1 SV=1 - [KV2A4_MOUSE]	0.581171	0.278065	0.142003	0.303106	0.439168	0.136062		P01629	Ig kappa chain V-II region 2S1.3 OS=Mus musculus PE=1 SV=1 - [KV2A4_MOUSE]	0.142003	0.278065	0.581171	-0.136062	-0.439168	-0.303106
P08226	Apolipoprotein E OS=Mus musculus GN=Apoe PE=1 SV=2 - [APOE_MOUSE]	0.571816	0.607511	0.74496	-0.035695	-0.173144	-0.137449		P08226	Apolipoprotein E OS=Mus musculus GN=Apoe PE=1 SV=2 - [APOE_MOUSE]	0.74496	0.607511	0.571816	0.137449	0.173144	0.035695
P01628	Ig kappa chain V-II region MOPC 511 OS=Mus musculus PE=1 SV=1 - [KV2A3_MOUSE]	0.553951	0.486062	0.403628	0.067889	0.150323	0.0824343		P01628	Ig kappa chain V-II region MOPC 511 OS=Mus musculus PE=1 SV=1 - [KV2A3_MOUSE]	0.403628	0.486062	0.553951	-0.0824343	-0.150323	-0.067889
P01783	Ig heavy chain V region MOPC 21 (Fragment) OS=Mus musculus PE=1 SV=1 - [HVM16_MOUSE]	0.548091	0.462207	0.56497	0.0858835	-0.0168788	-0.102762		P01783	Ig heavy chain V region MOPC 21 (Fragment) OS=Mus musculus PE=1 SV=1 - [HVM16_MOUSE]	0.56497	0.462207	0.548091	0.102762	0.0168788	-0.0858835
Q8CG16	Complement C1r-A subcomponent OS=Mus musculus GN=C1ra PE=1 SV=1 - [C1RA_MOUSE]	0.547627	0.690837	0.64683	-0.14321	-0.099203	0.044007		Q8CG16	Complement C1r-A subcomponent OS=Mus musculus GN=C1ra PE=1 SV=1 - [C1RA_MOUSE]	0.64683	0.690837	0.547627	-0.044007	0.099203	0.14321
P01749	Ig heavy chain V region 3 OS=Mus musculus GN=Ighv1-61 PE=1 SV=1 - [HVM05_MOUSE]	0.545683	0.535198	0.45419	0.0104857	0.0914931	0.0810075		P01749	Ig heavy chain V region 3 OS=Mus musculus GN=Ighv1-61 PE=1 SV=1 - [HVM05_MOUSE]	0.45419	0.535198	0.545683	-0.0810075	-0.0914931	-0.0104857
P41317	Mannose-binding protein C OS=Mus musculus GN=Mbl2 PE=1 SV=2 - [MBL2_MOUSE]	0.533363	0.355636	0.337082	0.177727	0.19628	0.0185537		P41317	Mannose-binding protein C OS=Mus musculus GN=Mbl2 PE=1 SV=2 - [MBL2_MOUSE]	0.337082	0.355636	0.533363	-0.0185537	-0.19628	-0.177727
Q00896	Alpha-1-antitrypsin 1-3 OS=Mus musculus GN=Serpina1c PE=1 SV=2 - [A1AT3_MOUSE]	0.530693	0.569136	0.557441	-0.0384424	-0.0267482	0.0116942		Q00896	Alpha-1-antitrypsin 1-3 OS=Mus musculus GN=Serpina1c PE=1 SV=2 - [A1AT3_MOUSE]	0.557441	0.569136	0.530693	-0.0116942	0.0267482	0.0384424
P01027	Complement C3 OS=Mus musculus GN=C3 PE=1 SV=3 - [CO3_MOUSE]	0.52879	0.421751	0.494113	0.107039	0.0346771	-0.0723622		P01027	Complement C3 OS=Mus musculus GN=C3 PE=1 SV=3 - [CO3_MOUSE]	0.494113	0.421751	0.52879	0.0723622	-0.0346771	-0.107039
Q8CFG8	Complement C1s-B subcomponent OS=Mus musculus GN=C1sb PE=2 SV=1 - [CS1B_MOUSE]	0.523062	0.244208	0.282824	0.278855	0.240239	-0.0386161		Q8CFG8	Complement C1s-B subcomponent OS=Mus musculus GN=C1sb PE=2 SV=1 - [CS1B_MOUSE]	0.282824	0.244208	0.523062	0.0386161	-0.240239	-0.278855
P01630	Ig kappa chain V-II region 7S34.1 OS=Mus musculus PE=1 SV=1 - [KV2A6_MOUSE]	0.504526	0.324046	0.384818	0.18048	0.119708	-0.0607717		P01630	Ig kappa chain V-II region 7S34.1 OS=Mus musculus PE=1 SV=1 - [KV2A6_MOUSE]	0.384818	0.324046	0.504526	0.0607717	-0.119708	-0.18048
P01820	Ig heavy chain V region PJ14 OS=Mus musculus PE=1 SV=1 - [HVM44_MOUSE]	0.492046	0.650643	0.652134	-0.158597	-0.160087	-0.00149077		P01820	Ig heavy chain V region PJ14 OS=Mus musculus PE=1 SV=1 - [HVM44_MOUSE]	0.652134	0.650643	0.492046	0.00149077	0.160087	0.158597
P06327	Ig heavy chain V region VH558 A1/A4 OS=Mus musculus GN=Gm5629 PE=2 SV=1 - [HVM52_MOUSE]	0.486066	0.468285	0.437634	0.0177811	0.0484313	0.0306502		P06327	Ig heavy chain V region VH558 A1/A4 OS=Mus musculus GN=Gm5629 PE=2 SV=1 - [HVM52_MOUSE]	0.437634	0.468285	0.486066	-0.0306502	-0.0484313	-0.0177811
P18524	Ig heavy chain V region RF OS=Mus musculus PE=1 SV=1 - [HVM53_MOUSE]	0.476034	0.541428	0.37376	-0.0653939	0.102274	0.167668		P18524	Ig heavy chain V region RF OS=Mus musculus PE=1 SV=1 - [HVM53_MOUSE]	0.37376	0.541428	0.476034	-0.167668	-0.102274	0.0653939
Q03734	Serine protease inhibitor A3M OS=Mus musculus GN=Serpina3m PE=1 SV=2 - [SPA3M_MOUSE]	0.465852	0.457862	0.664905	0.00798964	-0.199053	-0.207043		Q03734	Serine protease inhibitor A3M OS=Mus musculus GN=Serpina3m PE=1 SV=2 - [SPA3M_MOUSE]	0.664905	0.457862	0.465852	0.207043	0.199053	-0.00798964
A6X935	Inter alpha-trypsin inhibitor, heavy chain 4 OS=Mus musculus GN=Itih4 PE=1 SV=2 - [ITIH4_MOUSE]	0.437658	0.410848	0.455663	0.0268103	-0.0180052	-0.0448155		A6X935	Inter alpha-trypsin inhibitor, heavy chain 4 OS=Mus musculus GN=Itih4 PE=1 SV=2 - [ITIH4_MOUSE]	0.455663	0.410848	0.437658	0.0448155	0.0180052	-0.0268103
P01642	Ig kappa chain V-V region L7 (Fragment) OS=Mus musculus GN=Gm10881 PE=1 SV=1 - [KV5A9_MOUSE]	0.422251	0.661061	0.537386	-0.23881	-0.115135	0.123675		P01642	Ig kappa chain V-V region L7 (Fragment) OS=Mus musculus GN=Gm10881 PE=1 SV=1 - [KV5A9_MOUSE]	0.537386	0.661061	0.422251	-0.123675	0.115135	0.23881
P60710	Actin, cytoplasmic 1 OS=Mus musculus GN=Actb PE=1 SV=1 - [ACTB_MOUSE]	0.416806	0.339576	0.424923	0.0772293	-0.00811715	-0.0853464		P60710	Actin, cytoplasmic 1 OS=Mus musculus GN=Actb PE=1 SV=1 - [ACTB_MOUSE]	0.424923	0.339576	0.416806	0.0853464	0.00811715	-0.0772293
P49722	Proteasome subunit alpha type-2 OS=Mus musculus GN=Psma2 PE=1 SV=3 - [PSA2_MOUSE]	0.413904	0	0.100402	0.413904	0.313502	-0.100402		P49722	Proteasome subunit alpha type-2 OS=Mus musculus GN=Psma2 PE=1 SV=3 - [PSA2_MOUSE]	0.100402	0	0.413904	0.100402	-0.313502	-0.413904
P04186	Complement factor B OS=Mus musculus GN=Cfb PE=1 SV=2 - [CFAB_MOUSE]	0.41353	0.505011	0.545288	-0.0914817	-0.131759	-0.0402769		P04186	Complement factor B OS=Mus musculus GN=Cfb PE=1 SV=2 - [CFAB_MOUSE]	0.545288	0.505011	0.41353	0.0402769	0.131759	0.0914817
P01821	Ig heavy chain V region MC101 OS=Mus musculus PE=1 SV=1 - [HVM45_MOUSE]	0.408688	0.534022	0.607222	-0.125334	-0.198534	-0.0731998		P01821	Ig heavy chain V region MC101 OS=Mus musculus PE=1 SV=1 - [HVM45_MOUSE]	0.607222	0.534022	0.408688	0.0731998	0.198534	0.125334
P20918	Plasminogen OS=Mus musculus GN=Plg PE=1 SV=3 - [PLMN_MOUSE]	0.404678	0.530893	0.414091	-0.126215	-0.00941284	0.116802		P20918	Plasminogen OS=Mus musculus GN=Plg PE=1 SV=3 - [PLMN_MOUSE]	0.414091	0.530893	0.404678	-0.116802	0.00941284	0.126215
P22599	Alpha-1-antitrypsin 1-2 OS=Mus musculus GN=Serpina1b PE=1 SV=2 - [A1AT2_MOUSE]	0.399648	0	0.188733	0.399648	0.210915	-0.188733		P22599	Alpha-1-antitrypsin 1-2 OS=Mus musculus GN=Serpina1b PE=1 SV=2 - [A1AT2_MOUSE]	0.188733	0	0.399648	0.188733	-0.210915	-0.399648
P03977	Ig kappa chain V-III region 50S10.1 OS=Mus musculus PE=1 SV=1 - [KV3A4_MOUSE]	0.397482	0.444394	0.641045	-0.0469123	-0.243564	-0.196652		P03977	Ig kappa chain V-III region 50S10.1 OS=Mus musculus PE=1 SV=1 - [KV3A4_MOUSE]	0.641045	0.444394	0.397482	0.196652	0.243564	0.0469123
P02089	Hemoglobin subunit beta-2 OS=Mus musculus GN=Hbb-b2 PE=1 SV=2 - [HBB2_MOUSE]	0.385719	0.453871	0.208364	-0.0681522	0.177355	0.245507		P02089	Hemoglobin subunit beta-2 OS=Mus musculus GN=Hbb-b2 PE=1 SV=2 - [HBB2_MOUSE]	0.208364	0.453871	0.385719	-0.245507	-0.177355	0.0681522
P28665	Murinoglobulin-1 OS=Mus musculus GN=Mug1 PE=1 SV=3 - [MUG1_MOUSE]	0.377372	0.378844	0.362	-0.00147182	0.0153727	0.0168445		P28665	Murinoglobulin-1 OS=Mus musculus GN=Mug1 PE=1 SV=3 - [MUG1_MOUSE]	0.362	0.378844	0.377372	-0.0168445	-0.0153727	0.00147182
P12246	Serum amyloid P-component OS=Mus musculus GN=Apcs PE=1 SV=2 - [SAMP_MOUSE]	0.375504	0.342538	0.483516	0.0329653	-0.108012	-0.140978		P12246	Serum amyloid P-component OS=Mus musculus GN=Apcs PE=1 SV=2 - [SAMP_MOUSE]	0.483516	0.342538	0.375504	0.140978	0.108012	-0.0329653
P13020	Gelsolin OS=Mus musculus GN=Gsn PE=1 SV=3 - [GELS_MOUSE]	0.367695	0.46276	0.527351	-0.0950653	-0.159656	-0.0645907		P13020	Gelsolin OS=Mus musculus GN=Gsn PE=1 SV=3 - [GELS_MOUSE]	0.527351	0.46276	0.367695	0.0645907	0.159656	0.0950653
P01747	Ig heavy chain V region 36-65 OS=Mus musculus PE=1 SV=1 - [HVM03_MOUSE]	0.367413	0.456454	0.260826	-0.0890419	0.106586	0.195628		P01747	Ig heavy chain V region 36-65 OS=Mus musculus PE=1 SV=1 - [HVM03_MOUSE]	0.260826	0.456454	0.367413	-0.195628	-0.106586	0.0890419
Q91WP6	Serine protease inhibitor A3N OS=Mus musculus GN=Serpina3n PE=1 SV=1 - [SPA3N_MOUSE]	0.328839	0.365796	0.524722	-0.0369572	-0.195883	-0.158926		Q91WP6	Serine protease inhibitor A3N OS=Mus musculus GN=Serpina3n PE=1 SV=1 - [SPA3N_MOUSE]	0.524722	0.365796	0.328839	0.158926	0.195883	0.0369572
Q62351	Transferrin receptor protein 1 OS=Mus musculus GN=Tfrc PE=1 SV=1 - [TFR1_MOUSE]	0.310667	0.350604	0.198635	-0.0399373	0.112032	0.151969		Q62351	Transferrin receptor protein 1 OS=Mus musculus GN=Tfrc PE=1 SV=1 - [TFR1_MOUSE]	0.198635	0.350604	0.310667	-0.151969	-0.112032	0.0399373
P84751	Ig heavy chain Mem5 (Fragment) OS=Mus musculus PE=1 SV=1 - [HVM63_MOUSE]	0.30859	0.699832	0.926407	-0.391242	-0.617817	-0.226575		P84751	Ig heavy chain Mem5 (Fragment) OS=Mus musculus PE=1 SV=1 - [HVM63_MOUSE]	0.926407	0.699832	0.30859	0.226575	0.617817	0.391242
Q07235	Glia-derived nexin OS=Mus musculus GN=Serpine2 PE=1 SV=2 - [GDN_MOUSE]	0.303275	0.386569	0.426116	-0.0832939	-0.122841	-0.0395469		Q07235	Glia-derived nexin OS=Mus musculus GN=Serpine2 PE=1 SV=2 - [GDN_MOUSE]	0.426116	0.386569	0.303275	0.0395469	0.122841	0.0832939
P52480	Pyruvate kinase PKM OS=Mus musculus GN=Pkm PE=1 SV=4 - [KPYM_MOUSE]	0.279376	0.392112	0.317527	-0.112736	-0.0381505	0.0745855		P52480	Pyruvate kinase PKM OS=Mus musculus GN=Pkm PE=1 SV=4 - [KPYM_MOUSE]	0.317527	0.392112	0.279376	-0.0745855	0.0381505	0.112736
Q921I1	Serotransferrin OS=Mus musculus GN=Tf PE=1 SV=1 - [TRFE_MOUSE]	0.260279	0.307258	0.258953	-0.0469782	0.00132633	0.0483045		Q921I1	Serotransferrin OS=Mus musculus GN=Tf PE=1 SV=1 - [TRFE_MOUSE]	0.258953	0.307258	0.260279	-0.0483045	-0.00132633	0.0469782
P29391	Ferritin light chain 1 OS=Mus musculus GN=Ftl1 PE=1 SV=2 - [FRIL1_MOUSE]	0.247408	0	0	0.247408	0.247408	0		P29391	Ferritin light chain 1 OS=Mus musculus GN=Ftl1 PE=1 SV=2 - [FRIL1_MOUSE]	0	0	0.247408	0	-0.247408	-0.247408
P01633	Ig kappa chain V19-17 OS=Mus musculus GN=Igk-V19-17 PE=1 SV=1 - [KV5A1_MOUSE]	0.24273	0.325653	0.211203	-0.0829234	0.0315268	0.11445		P01633	Ig kappa chain V19-17 OS=Mus musculus GN=Igk-V19-17 PE=1 SV=1 - [KV5A1_MOUSE]	0.211203	0.325653	0.24273	-0.11445	-0.0315268	0.0829234
Q8BH35	Complement component C8 beta chain OS=Mus musculus GN=C8b PE=1 SV=1 - [CO8B_MOUSE]	0.230418	0.206725	0.247579	0.0236932	-0.0171607	-0.0408539		Q8BH35	Complement component C8 beta chain OS=Mus musculus GN=C8b PE=1 SV=1 - [CO8B_MOUSE]	0.247579	0.206725	0.230418	0.0408539	0.0171607	-0.0236932
O09061	Proteasome subunit beta type-1 OS=Mus musculus GN=Psmb1 PE=1 SV=1 - [PSB1_MOUSE]	0.22541	0.0859038	0.14944	0.139506	0.07597	-0.0635362		O09061	Proteasome subunit beta type-1 OS=Mus musculus GN=Psmb1 PE=1 SV=1 - [PSB1_MOUSE]	0.14944	0.0859038	0.22541	0.0635362	-0.07597	-0.139506
P19221	Prothrombin OS=Mus musculus GN=F2 PE=1 SV=1 - [THRB_MOUSE]	0.224857	0.358453	0.371249	-0.133596	-0.146391	-0.0127956		P19221	Prothrombin OS=Mus musculus GN=F2 PE=1 SV=1 - [THRB_MOUSE]	0.371249	0.358453	0.224857	0.0127956	0.146391	0.133596
Q9JJN5	Carboxypeptidase N catalytic chain OS=Mus musculus GN=Cpn1 PE=1 SV=1 - [CBPN_MOUSE]	0.220873	0.329616	0.304058	-0.108743	-0.0831846	0.0255579		Q9JJN5	Carboxypeptidase N catalytic chain OS=Mus musculus GN=Cpn1 PE=1 SV=1 - [CBPN_MOUSE]	0.304058	0.329616	0.220873	-0.0255579	0.0831846	0.108743
P06684	Complement C5 OS=Mus musculus GN=C5 PE=1 SV=2 - [CO5_MOUSE]	0.209544	0.0986469	0.13524	0.110897	0.0743043	-0.036593		P06684	Complement C5 OS=Mus musculus GN=C5 PE=1 SV=2 - [CO5_MOUSE]	0.13524	0.0986469	0.209544	0.036593	-0.0743043	-0.110897
P04940	Ig kappa chain V-VI region NQ2-17.4.1 OS=Mus musculus PE=2 SV=1 - [KV6A6_MOUSE]	0.207018	0	0	0.207018	0.207018	0		P04940	Ig kappa chain V-VI region NQ2-17.4.1 OS=Mus musculus PE=2 SV=1 - [KV6A6_MOUSE]	0	0	0.207018	0	-0.207018	-0.207018
Q8VCG4	Complement component C8 gamma chain OS=Mus musculus GN=C8g PE=1 SV=1 - [CO8G_MOUSE]	0.201218	0.230231	0.262642	-0.0290133	-0.0614241	-0.0324108		Q8VCG4	Complement component C8 gamma chain OS=Mus musculus GN=C8g PE=1 SV=1 - [CO8G_MOUSE]	0.262642	0.230231	0.201218	0.0324108	0.0614241	0.0290133
O08677	Kininogen-1 OS=Mus musculus GN=Kng1 PE=1 SV=1 - [KNG1_MOUSE]	0.199238	0.455339	0.328902	-0.2561	-0.129664	0.126436		O08677	Kininogen-1 OS=Mus musculus GN=Kng1 PE=1 SV=1 - [KNG1_MOUSE]	0.328902	0.455339	0.199238	-0.126436	0.129664	0.2561
P01723	Ig lambda-1 chain V region OS=Mus musculus PE=1 SV=2 - [LV1A_MOUSE]	0.195823	0	0	0.195823	0.195823	0		P01723	Ig lambda-1 chain V region OS=Mus musculus PE=1 SV=2 - [LV1A_MOUSE]	0	0	0.195823	0	-0.195823	-0.195823
P28666	Murinoglobulin-2 OS=Mus musculus GN=Mug2 PE=1 SV=2 - [MUG2_MOUSE]	0.195084	0.177086	0.169442	0.0179987	0.025642	0.00764335		P28666	Murinoglobulin-2 OS=Mus musculus GN=Mug2 PE=1 SV=2 - [MUG2_MOUSE]	0.169442	0.177086	0.195084	-0.00764335	-0.025642	-0.0179987
P68368	Tubulin alpha-4A chain OS=Mus musculus GN=Tuba4a PE=1 SV=1 - [TBA4A_MOUSE]	0.190203	0.225463	0.236822	-0.0352599	-0.0466187	-0.0113588		P68368	Tubulin alpha-4A chain OS=Mus musculus GN=Tuba4a PE=1 SV=1 - [TBA4A_MOUSE]	0.236822	0.225463	0.190203	0.0113588	0.0466187	0.0352599
P11276	Fibronectin OS=Mus musculus GN=Fn1 PE=1 SV=4 - [FINC_MOUSE]	0.177704	0.0823393	0.084174	0.0953645	0.0935298	-0.0018347		P11276	Fibronectin OS=Mus musculus GN=Fn1 PE=1 SV=4 - [FINC_MOUSE]	0.084174	0.0823393	0.177704	0.0018347	-0.0935298	-0.0953645
P68372	Tubulin beta-4B chain OS=Mus musculus GN=Tubb4b PE=1 SV=1 - [TBB4B_MOUSE]	0.17455	0.221054	0.259397	-0.0465034	-0.0848472	-0.0383438		P68372	Tubulin beta-4B chain OS=Mus musculus GN=Tubb4b PE=1 SV=1 - [TBB4B_MOUSE]	0.259397	0.221054	0.17455	0.0383438	0.0848472	0.0465034
P11679	Keratin, type II cytoskeletal 8 OS=Mus musculus GN=Krt8 PE=1 SV=4 - [K2C8_MOUSE]	0.174022	0.106901	0.104029	0.067121	0.0699938	0.0028728		P11679	Keratin, type II cytoskeletal 8 OS=Mus musculus GN=Krt8 PE=1 SV=4 - [K2C8_MOUSE]	0.104029	0.106901	0.174022	-0.0028728	-0.0699938	-0.067121
P14847	C-reactive protein OS=Mus musculus GN=Crp PE=1 SV=2 - [CRP_MOUSE]	0.171491	0.140684	0.0684308	0.0308064	0.10306	0.0722535		P14847	C-reactive protein OS=Mus musculus GN=Crp PE=1 SV=2 - [CRP_MOUSE]	0.0684308	0.140684	0.171491	-0.0722535	-0.10306	-0.0308064
P98064	Mannan-binding lectin serine protease 1 OS=Mus musculus GN=Masp1 PE=1 SV=2 - [MASP1_MOUSE]	0.165405	0.109417	0.123208	0.0559878	0.042197	-0.0137908		P98064	Mannan-binding lectin serine protease 1 OS=Mus musculus GN=Masp1 PE=1 SV=2 - [MASP1_MOUSE]	0.123208	0.109417	0.165405	0.0137908	-0.042197	-0.0559878
O70570	Polymeric immunoglobulin receptor OS=Mus musculus GN=Pigr PE=1 SV=1 - [PIGR_MOUSE]	0.164998	0.0686262	0.0769902	0.0963718	0.0880078	-0.00836404		O70570	Polymeric immunoglobulin receptor OS=Mus musculus GN=Pigr PE=1 SV=1 - [PIGR_MOUSE]	0.0769902	0.0686262	0.164998	0.00836404	-0.0880078	-0.0963718
P06728	Apolipoprotein A-IV OS=Mus musculus GN=Apoa4 PE=1 SV=3 - [APOA4_MOUSE]	0.157727	0.149349	0	0.00837837	0.157727	0.149349		P06728	Apolipoprotein A-IV OS=Mus musculus GN=Apoa4 PE=1 SV=3 - [APOA4_MOUSE]	0	0.149349	0.157727	-0.149349	-0.157727	-0.00837837
Q61702	Inter-alpha-trypsin inhibitor heavy chain H1 OS=Mus musculus GN=Itih1 PE=1 SV=2 - [ITIH1_MOUSE]	0.154552	0.215594	0.257392	-0.0610419	-0.10284	-0.0417986		Q61702	Inter-alpha-trypsin inhibitor heavy chain H1 OS=Mus musculus GN=Itih1 PE=1 SV=2 - [ITIH1_MOUSE]	0.257392	0.215594	0.154552	0.0417986	0.10284	0.0610419
Q61805	Lipopolysaccharide-binding protein OS=Mus musculus GN=Lbp PE=1 SV=2 - [LBP_MOUSE]	0.152297	0.135833	0.144131	0.0164639	0.00816633	-0.00829762		Q61805	Lipopolysaccharide-binding protein OS=Mus musculus GN=Lbp PE=1 SV=2 - [LBP_MOUSE]	0.144131	0.135833	0.152297	0.00829762	-0.00816633	-0.0164639
P26041	Moesin OS=Mus musculus GN=Msn PE=1 SV=3 - [MOES_MOUSE]	0.145435	0.195973	0.212877	-0.0505384	-0.0674417	-0.0169033		P26041	Moesin OS=Mus musculus GN=Msn PE=1 SV=3 - [MOES_MOUSE]	0.212877	0.195973	0.145435	0.0169033	0.0674417	0.0505384
Q8K182	Complement component C8 alpha chain OS=Mus musculus GN=C8a PE=1 SV=1 - [CO8A_MOUSE]	0.143702	0.156843	0.178923	-0.0131415	-0.0352211	-0.0220796		Q8K182	Complement component C8 alpha chain OS=Mus musculus GN=C8a PE=1 SV=1 - [CO8A_MOUSE]	0.178923	0.156843	0.143702	0.0220796	0.0352211	0.0131415
P40240	CD9 antigen OS=Mus musculus GN=Cd9 PE=1 SV=2 - [CD9_MOUSE]	0.140603	0	0	0.140603	0.140603	0		P40240	CD9 antigen OS=Mus musculus GN=Cd9 PE=1 SV=2 - [CD9_MOUSE]	0	0	0.140603	0	-0.140603	-0.140603
Q9R1P3	Proteasome subunit beta type-2 OS=Mus musculus GN=Psmb2 PE=1 SV=1 - [PSB2_MOUSE]	0.139311	0	0.09629	0.139311	0.0430212	-0.09629		Q9R1P3	Proteasome subunit beta type-2 OS=Mus musculus GN=Psmb2 PE=1 SV=1 - [PSB2_MOUSE]	0.09629	0	0.139311	0.09629	-0.0430212	-0.139311
Q9R1P1	Proteasome subunit beta type-3 OS=Mus musculus GN=Psmb3 PE=1 SV=1 - [PSB3_MOUSE]	0.138961	0	0.07557	0.138961	0.0633909	-0.07557		Q9R1P1	Proteasome subunit beta type-3 OS=Mus musculus GN=Psmb3 PE=1 SV=1 - [PSB3_MOUSE]	0.07557	0	0.138961	0.07557	-0.0633909	-0.138961
P11680	Properdin OS=Mus musculus GN=Cfp PE=2 SV=2 - [PROP_MOUSE]	0.137552	0.236604	0.195778	-0.0990521	-0.0582261	0.0408259		P11680	Properdin OS=Mus musculus GN=Cfp PE=2 SV=2 - [PROP_MOUSE]	0.195778	0.236604	0.137552	-0.0408259	0.0582261	0.0990521
Q80YC5	Coagulation factor XII OS=Mus musculus GN=F12 PE=1 SV=2 - [FA12_MOUSE]	0.135129	0.154084	0.179956	-0.0189546	-0.0448268	-0.0258723		Q80YC5	Coagulation factor XII OS=Mus musculus GN=F12 PE=1 SV=2 - [FA12_MOUSE]	0.179956	0.154084	0.135129	0.0258723	0.0448268	0.0189546
Q9Z2U1	Proteasome subunit alpha type-5 OS=Mus musculus GN=Psma5 PE=1 SV=1 - [PSA5_MOUSE]	0.134459	0	0.0835125	0.134459	0.0509467	-0.0835125		Q9Z2U1	Proteasome subunit alpha type-5 OS=Mus musculus GN=Psma5 PE=1 SV=1 - [PSA5_MOUSE]	0.0835125	0	0.134459	0.0835125	-0.0509467	-0.134459
P01592	Immunoglobulin J chain OS=Mus musculus GN=Jchain PE=1 SV=4 - [IGJ_MOUSE]	0.132865	0.198062	0	-0.0651967	0.132865	0.198062		P01592	Immunoglobulin J chain OS=Mus musculus GN=Jchain PE=1 SV=4 - [IGJ_MOUSE]	0	0.198062	0.132865	-0.198062	-0.132865	0.0651967
P35441	Thrombospondin-1 OS=Mus musculus GN=Thbs1 PE=1 SV=1 - [TSP1_MOUSE]	0.132791	0.138694	0.261452	-0.0059031	-0.128661	-0.122758		P35441	Thrombospondin-1 OS=Mus musculus GN=Thbs1 PE=1 SV=1 - [TSP1_MOUSE]	0.261452	0.138694	0.132791	0.122758	0.128661	0.0059031
P62962	Profilin-1 OS=Mus musculus GN=Pfn1 PE=1 SV=2 - [PROF1_MOUSE]	0.130751	0	0	0.130751	0.130751	0		P62962	Profilin-1 OS=Mus musculus GN=Pfn1 PE=1 SV=2 - [PROF1_MOUSE]	0	0	0.130751	0	-0.130751	-0.130751
O88783	Coagulation factor V OS=Mus musculus GN=F5 PE=1 SV=1 - [FA5_MOUSE]	0.127817	0.175294	0.1537	-0.047477	-0.0258822	0.0215948		O88783	Coagulation factor V OS=Mus musculus GN=F5 PE=1 SV=1 - [FA5_MOUSE]	0.1537	0.175294	0.127817	-0.0215948	0.0258822	0.047477
A2AQ07	Tubulin beta-1 chain OS=Mus musculus GN=Tubb1 PE=1 SV=1 - [TBB1_MOUSE]	0.121422	0.120419	0.212533	0.00100289	-0.0911116	-0.0921145		A2AQ07	Tubulin beta-1 chain OS=Mus musculus GN=Tubb1 PE=1 SV=1 - [TBB1_MOUSE]	0.212533	0.120419	0.121422	0.0921145	0.0911116	-0.00100289
P84750	Ig kappa chain V region Mem5 (Fragment) OS=Mus musculus PE=1 SV=1 - [KVM5_MOUSE]	0.12041	0	0.130964	0.12041	-0.0105533	-0.130964		P84750	Ig kappa chain V region Mem5 (Fragment) OS=Mus musculus PE=1 SV=1 - [KVM5_MOUSE]	0.130964	0	0.12041	0.130964	0.0105533	-0.12041
Q91WP0	Mannan-binding lectin serine protease 2 OS=Mus musculus GN=Masp2 PE=1 SV=1 - [MASP2_MOUSE]	0.117565	0.059056	0.0636785	0.0585087	0.0538862	-0.00462252		Q91WP0	Mannan-binding lectin serine protease 2 OS=Mus musculus GN=Masp2 PE=1 SV=1 - [MASP2_MOUSE]	0.0636785	0.059056	0.117565	0.00462252	-0.0538862	-0.0585087
Q91X72	Hemopexin OS=Mus musculus GN=Hpx PE=1 SV=2 - [HEMO_MOUSE]	0.115838	0.214648	0.0845415	-0.0988102	0.031296	0.130106		Q91X72	Hemopexin OS=Mus musculus GN=Hpx PE=1 SV=2 - [HEMO_MOUSE]	0.0845415	0.214648	0.115838	-0.130106	-0.031296	0.0988102
P62835	Ras-related protein Rap-1A OS=Mus musculus GN=Rap1a PE=1 SV=1 - [RAP1A_MOUSE]	0.114038	0.235443	0.124033	-0.121405	-0.00999483	0.11141		P62835	Ras-related protein Rap-1A OS=Mus musculus GN=Rap1a PE=1 SV=1 - [RAP1A_MOUSE]	0.124033	0.235443	0.114038	-0.11141	0.00999483	0.121405
P06909	Complement factor H OS=Mus musculus GN=Cfh PE=1 SV=2 - [CFAH_MOUSE]	0.103945	0.0564764	0.0311818	0.0474688	0.0727634	0.0252946		P06909	Complement factor H OS=Mus musculus GN=Cfh PE=1 SV=2 - [CFAH_MOUSE]	0.0311818	0.0564764	0.103945	-0.0252946	-0.0727634	-0.0474688
Q922U2	Keratin, type II cytoskeletal 5 OS=Mus musculus GN=Krt5 PE=1 SV=1 - [K2C5_MOUSE]	0.103326	0	0	0.103326	0.103326	0		Q922U2	Keratin, type II cytoskeletal 5 OS=Mus musculus GN=Krt5 PE=1 SV=1 - [K2C5_MOUSE]	0	0	0.103326	0	-0.103326	-0.103326
P02535	Keratin, type I cytoskeletal 10 OS=Mus musculus GN=Krt10 PE=1 SV=3 - [K1C10_MOUSE]	0.102897	0.0463167	0.0450582	0.0565801	0.0578386	0.00125854		P02535	Keratin, type I cytoskeletal 10 OS=Mus musculus GN=Krt10 PE=1 SV=3 - [K1C10_MOUSE]	0.0450582	0.0463167	0.102897	-0.00125854	-0.0578386	-0.0565801
O35522	Proteasome subunit beta type-9 OS=Mus musculus bactrianus GN=Psmb9 PE=1 SV=1 - [PSB9_MUSMB]	0.102163	0	0	0.102163	0.102163	0		O35522	Proteasome subunit beta type-9 OS=Mus musculus bactrianus GN=Psmb9 PE=1 SV=1 - [PSB9_MUSMB]	0	0	0.102163	0	-0.102163	-0.102163
P26039	Talin-1 OS=Mus musculus GN=Tln1 PE=1 SV=2 - [TLN1_MOUSE]	0.0996634	0.140784	0.132926	-0.0411207	-0.033263	0.00785768		P26039	Talin-1 OS=Mus musculus GN=Tln1 PE=1 SV=2 - [TLN1_MOUSE]	0.132926	0.140784	0.0996634	-0.00785768	0.033263	0.0411207
Q61703	Inter-alpha-trypsin inhibitor heavy chain H2 OS=Mus musculus GN=Itih2 PE=1 SV=1 - [ITIH2_MOUSE]	0.0971738	0.103987	0.214349	-0.00681349	-0.117175	-0.110362		Q61703	Inter-alpha-trypsin inhibitor heavy chain H2 OS=Mus musculus GN=Itih2 PE=1 SV=1 - [ITIH2_MOUSE]	0.214349	0.103987	0.0971738	0.110362	0.117175	0.00681349	+
P17182	Alpha-enolase OS=Mus musculus GN=Eno1 PE=1 SV=3 - [ENOA_MOUSE]	0.0960736	0.109926	0.0701822	-0.0138527	0.0258914	0.0397441		P17182	Alpha-enolase OS=Mus musculus GN=Eno1 PE=1 SV=3 - [ENOA_MOUSE]	0.0701822	0.109926	0.0960736	-0.0397441	-0.0258914	0.0138527
P04104	Keratin, type II cytoskeletal 1 OS=Mus musculus GN=Krt1 PE=1 SV=4 - [K2C1_MOUSE]	0.0933525	0.075316	0.103331	0.0180364	-0.00997884	-0.0280153		P04104	Keratin, type II cytoskeletal 1 OS=Mus musculus GN=Krt1 PE=1 SV=4 - [K2C1_MOUSE]	0.103331	0.075316	0.0933525	0.0280153	0.00997884	-0.0180364
Q8BH61	Coagulation factor XIII A chain OS=Mus musculus GN=F13a1 PE=1 SV=3 - [F13A_MOUSE]	0.0853576	0.0837174	0.115584	0.00164021	-0.0302265	-0.0318667		Q8BH61	Coagulation factor XIII A chain OS=Mus musculus GN=F13a1 PE=1 SV=3 - [F13A_MOUSE]	0.115584	0.0837174	0.0853576	0.0318667	0.0302265	-0.00164021
O70435	Proteasome subunit alpha type-3 OS=Mus musculus GN=Psma3 PE=1 SV=3 - [PSA3_MOUSE]	0.0842569	0	0.0776496	0.0842569	0.00660729	-0.0776496		O70435	Proteasome subunit alpha type-3 OS=Mus musculus GN=Psma3 PE=1 SV=3 - [PSA3_MOUSE]	0.0776496	0	0.0842569	0.0776496	-0.00660729	-0.0842569
P17156	Heat shock-related 70 kDa protein 2 OS=Mus musculus GN=Hspa2 PE=1 SV=2 - [HSP72_MOUSE]	0.0842432	0	0.0848838	0.0842432	-0.00064067	-0.0848838		P17156	Heat shock-related 70 kDa protein 2 OS=Mus musculus GN=Hspa2 PE=1 SV=2 - [HSP72_MOUSE]	0.0848838	0	0.0842432	0.0848838	0.00064067	-0.0842432
O35955	Proteasome subunit beta type-10 OS=Mus musculus GN=Psmb10 PE=1 SV=1 - [PSB10_MOUSE]	0.0823484	0	0	0.0823484	0.0823484	0		O35955	Proteasome subunit beta type-10 OS=Mus musculus GN=Psmb10 PE=1 SV=1 - [PSB10_MOUSE]	0	0	0.0823484	0	-0.0823484	-0.0823484
P50446	Keratin, type II cytoskeletal 6A OS=Mus musculus GN=Krt6a PE=1 SV=3 - [K2C6A_MOUSE]	0.0806699	0.102365	0.0438701	-0.0216955	0.0367998	0.0584953		P50446	Keratin, type II cytoskeletal 6A OS=Mus musculus GN=Krt6a PE=1 SV=3 - [K2C6A_MOUSE]	0.0438701	0.102365	0.0806699	-0.0584953	-0.0367998	0.0216955
P68373	Tubulin alpha-1C chain OS=Mus musculus GN=Tuba1c PE=1 SV=1 - [TBA1C_MOUSE]	0.0783682	0.202835	0.154676	-0.124466	-0.076308	0.0481585		P68373	Tubulin alpha-1C chain OS=Mus musculus GN=Tuba1c PE=1 SV=1 - [TBA1C_MOUSE]	0.154676	0.202835	0.0783682	-0.0481585	0.076308	0.124466
P54116	Erythrocyte band 7 integral membrane protein OS=Mus musculus GN=Stom PE=1 SV=3 - [STOM_MOUSE]	0.0762804	0.0852833	0	-0.00900291	0.0762804	0.0852833		P54116	Erythrocyte band 7 integral membrane protein OS=Mus musculus GN=Stom PE=1 SV=3 - [STOM_MOUSE]	0	0.0852833	0.0762804	-0.0852833	-0.0762804	0.00900291
Q61781	Keratin, type I cytoskeletal 14 OS=Mus musculus GN=Krt14 PE=1 SV=2 - [K1C14_MOUSE]	0.0754505	0	0	0.0754505	0.0754505	0		Q61781	Keratin, type I cytoskeletal 14 OS=Mus musculus GN=Krt14 PE=1 SV=2 - [K1C14_MOUSE]	0	0	0.0754505	0	-0.0754505	-0.0754505
Q9QUM0	Integrin alpha-IIb OS=Mus musculus GN=Itga2b PE=1 SV=2 - [ITA2B_MOUSE]	0.0717102	0.0438526	0.0776524	0.0278576	-0.00594215	-0.0337998		Q9QUM0	Integrin alpha-IIb OS=Mus musculus GN=Itga2b PE=1 SV=2 - [ITA2B_MOUSE]	0.0776524	0.0438526	0.0717102	0.0337998	0.00594215	-0.0278576
Q8VED5	Keratin, type II cytoskeletal 79 OS=Mus musculus GN=Krt79 PE=1 SV=2 - [K2C79_MOUSE]	0.0693075	0	0	0.0693075	0.0693075	0		Q8VED5	Keratin, type II cytoskeletal 79 OS=Mus musculus GN=Krt79 PE=1 SV=2 - [K2C79_MOUSE]	0	0	0.0693075	0	-0.0693075	-0.0693075
Q8BTM8	Filamin-A OS=Mus musculus GN=Flna PE=1 SV=5 - [FLNA_MOUSE]	0.0681715	0.0558831	0.0653117	0.0122884	0.00285981	-0.00942856		Q8BTM8	Filamin-A OS=Mus musculus GN=Flna PE=1 SV=5 - [FLNA_MOUSE]	0.0653117	0.0558831	0.0681715	0.00942856	-0.00285981	-0.0122884
Q9QWL7	Keratin, type I cytoskeletal 17 OS=Mus musculus GN=Krt17 PE=1 SV=3 - [K1C17_MOUSE]	0.0662568	0	0	0.0662568	0.0662568	0		Q9QWL7	Keratin, type I cytoskeletal 17 OS=Mus musculus GN=Krt17 PE=1 SV=3 - [K1C17_MOUSE]	0	0	0.0662568	0	-0.0662568	-0.0662568
Q61147	Ceruloplasmin OS=Mus musculus GN=Cp PE=1 SV=2 - [CERU_MOUSE]	0.0652092	0.0368107	0.0429726	0.0283985	0.0222366	-0.00616186		Q61147	Ceruloplasmin OS=Mus musculus GN=Cp PE=1 SV=2 - [CERU_MOUSE]	0.0429726	0.0368107	0.0652092	0.00616186	-0.0222366	-0.0283985
E9Q414	Apolipoprotein B-100 OS=Mus musculus GN=Apob PE=1 SV=1 - [APOB_MOUSE]	0.0649615	0.0594749	0.0484383	0.00548665	0.0165232	0.0110366		E9Q414	Apolipoprotein B-100 OS=Mus musculus GN=Apob PE=1 SV=1 - [APOB_MOUSE]	0.0484383	0.0594749	0.0649615	-0.0110366	-0.0165232	-0.00548665
Q6IFX2	Keratin, type I cytoskeletal 42 OS=Mus musculus GN=Krt42 PE=1 SV=1 - [K1C42_MOUSE]	0.0636518	0	0	0.0636518	0.0636518	0		Q6IFX2	Keratin, type I cytoskeletal 42 OS=Mus musculus GN=Krt42 PE=1 SV=1 - [K1C42_MOUSE]	0	0	0.0636518	0	-0.0636518	-0.0636518
Q8K1B8	Fermitin family homolog 3 OS=Mus musculus GN=Fermt3 PE=1 SV=1 - [URP2_MOUSE]	0.0598801	0.145637	0.150101	-0.085757	-0.0902208	-0.00446381		Q8K1B8	Fermitin family homolog 3 OS=Mus musculus GN=Fermt3 PE=1 SV=1 - [URP2_MOUSE]	0.150101	0.145637	0.0598801	0.00446381	0.0902208	0.085757
P70194	C-type lectin domain family 4 member F OS=Mus musculus GN=Clec4f PE=1 SV=1 - [CLC4F_MOUSE]	0.0579602	0.0369753	0	0.0209849	0.0579602	0.0369753		P70194	C-type lectin domain family 4 member F OS=Mus musculus GN=Clec4f PE=1 SV=1 - [CLC4F_MOUSE]	0	0.0369753	0.0579602	-0.0369753	-0.0579602	-0.0209849
Q9Z2U0	Proteasome subunit alpha type-7 OS=Mus musculus GN=Psma7 PE=1 SV=1 - [PSA7_MOUSE]	0.05728	0	0	0.05728	0.05728	0		Q9Z2U0	Proteasome subunit alpha type-7 OS=Mus musculus GN=Psma7 PE=1 SV=1 - [PSA7_MOUSE]	0	0	0.05728	0	-0.05728	-0.05728
P06745	Glucose-6-phosphate isomerase OS=Mus musculus GN=Gpi PE=1 SV=4 - [G6PI_MOUSE]	0.0565774	0.0645135	0.0627883	-0.00793611	-0.00621091	0.0017252		P06745	Glucose-6-phosphate isomerase OS=Mus musculus GN=Gpi PE=1 SV=4 - [G6PI_MOUSE]	0.0627883	0.0645135	0.0565774	-0.0017252	0.00621091	0.00793611
P99026	Proteasome subunit beta type-4 OS=Mus musculus GN=Psmb4 PE=1 SV=1 - [PSB4_MOUSE]	0.0548001	0	0.0894046	0.0548001	-0.0346045	-0.0894046		P99026	Proteasome subunit beta type-4 OS=Mus musculus GN=Psmb4 PE=1 SV=1 - [PSB4_MOUSE]	0.0894046	0	0.0548001	0.0894046	0.0346045	-0.0548001
Q8VDD5	Myosin-9 OS=Mus musculus GN=Myh9 PE=1 SV=4 - [MYH9_MOUSE]	0.0541099	0.0833708	0.0880852	-0.0292609	-0.0339753	-0.00471441		Q8VDD5	Myosin-9 OS=Mus musculus GN=Myh9 PE=1 SV=4 - [MYH9_MOUSE]	0.0880852	0.0833708	0.0541099	0.00471441	0.0339753	0.0292609
Q9R1P4	Proteasome subunit alpha type-1 OS=Mus musculus GN=Psma1 PE=1 SV=1 - [PSA1_MOUSE]	0.0540012	0	0	0.0540012	0.0540012	0		Q9R1P4	Proteasome subunit alpha type-1 OS=Mus musculus GN=Psma1 PE=1 SV=1 - [PSA1_MOUSE]	0	0	0.0540012	0	-0.0540012	-0.0540012
P49182	Heparin cofactor 2 OS=Mus musculus GN=Serpind1 PE=1 SV=1 - [HEP2_MOUSE]	0.0538285	0.0327335	0.0318441	0.021095	0.0219844	0.000889449		P49182	Heparin cofactor 2 OS=Mus musculus GN=Serpind1 PE=1 SV=1 - [HEP2_MOUSE]	0.0318441	0.0327335	0.0538285	-0.000889449	-0.0219844	-0.021095
P70389	Insulin-like growth factor-binding protein complex acid labile subunit OS=Mus musculus GN=Igfals PE=1 SV=1 - [ALS_MOUSE]	0.0530343	0.0737937	0.0847729	-0.0207594	-0.0317386	-0.0109792		P70389	Insulin-like growth factor-binding protein complex acid labile subunit OS=Mus musculus GN=Igfals PE=1 SV=1 - [ALS_MOUSE]	0.0847729	0.0737937	0.0530343	0.0109792	0.0317386	0.0207594
P04919	Band 3 anion transport protein OS=Mus musculus GN=Slc4a1 PE=1 SV=1 - [B3AT_MOUSE]	0.0516486	0.0479104	0.021386	0.0037382	0.0302627	0.0265245		P04919	Band 3 anion transport protein OS=Mus musculus GN=Slc4a1 PE=1 SV=1 - [B3AT_MOUSE]	0.021386	0.0479104	0.0516486	-0.0265245	-0.0302627	-0.0037382
Q9JHI0	Matrix metalloproteinase-19 OS=Mus musculus GN=Mmp19 PE=2 SV=1 - [MMP19_MOUSE]	0.0496171	0.0684907	0.0373066	-0.0188737	0.0123105	0.0311842		Q9JHI0	Matrix metalloproteinase-19 OS=Mus musculus GN=Mmp19 PE=2 SV=1 - [MMP19_MOUSE]	0.0373066	0.0684907	0.0496171	-0.0311842	-0.0123105	0.0188737
P05214	Tubulin alpha-3 chain OS=Mus musculus GN=Tuba3a PE=1 SV=1 - [TBA3_MOUSE]	0.0479055	0	0.0868403	0.0479055	-0.0389348	-0.0868403		P05214	Tubulin alpha-3 chain OS=Mus musculus GN=Tuba3a PE=1 SV=1 - [TBA3_MOUSE]	0.0868403	0	0.0479055	0.0868403	0.0389348	-0.0479055
P08607	C4b-binding protein OS=Mus musculus GN=C4bpa PE=1 SV=3 - [C4BPA_MOUSE]	0.0464519	0	0	0.0464519	0.0464519	0		P08607	C4b-binding protein OS=Mus musculus GN=C4bpa PE=1 SV=3 - [C4BPA_MOUSE]	0	0	0.0464519	0	-0.0464519	-0.0464519
P08071	Lactotransferrin OS=Mus musculus GN=Ltf PE=1 SV=4 - [TRFL_MOUSE]	0.0456233	0.0894932	0.148874	-0.0438699	-0.103251	-0.0593811		P08071	Lactotransferrin OS=Mus musculus GN=Ltf PE=1 SV=4 - [TRFL_MOUSE]	0.148874	0.0894932	0.0456233	0.0593811	0.103251	0.0438699
P63017	Heat shock cognate 71 kDa protein OS=Mus musculus GN=Hspa8 PE=1 SV=1 - [HSP7C_MOUSE]	0.0450261	0.158822	0	-0.113795	0.0450261	0.158822		P63017	Heat shock cognate 71 kDa protein OS=Mus musculus GN=Hspa8 PE=1 SV=1 - [HSP7C_MOUSE]	0	0.158822	0.0450261	-0.158822	-0.0450261	0.113795
Q61247	Alpha-2-antiplasmin OS=Mus musculus GN=Serpinf2 PE=1 SV=1 - [A2AP_MOUSE]	0.0435372	0	0	0.0435372	0.0435372	0		Q61247	Alpha-2-antiplasmin OS=Mus musculus GN=Serpinf2 PE=1 SV=1 - [A2AP_MOUSE]	0	0	0.0435372	0	-0.0435372	-0.0435372
P01898	H-2 class I histocompatibility antigen, Q10 alpha chain OS=Mus musculus GN=H2-Q10 PE=1 SV=3 - [HA10_MOUSE]	0.0428324	0	0	0.0428324	0.0428324	0		P01898	H-2 class I histocompatibility antigen, Q10 alpha chain OS=Mus musculus GN=H2-Q10 PE=1 SV=3 - [HA10_MOUSE]	0	0	0.0428324	0	-0.0428324	-0.0428324
Q61646	Haptoglobin OS=Mus musculus GN=Hp PE=1 SV=1 - [HPT_MOUSE]	0.0411733	0.0460327	0.12409	-0.00485943	-0.0829164	-0.078057		Q61646	Haptoglobin OS=Mus musculus GN=Hp PE=1 SV=1 - [HPT_MOUSE]	0.12409	0.0460327	0.0411733	0.078057	0.0829164	0.00485943
Q61414	Keratin, type I cytoskeletal 15 OS=Mus musculus GN=Krt15 PE=1 SV=2 - [K1C15_MOUSE]	0.0397988	0.0363029	0	0.00349589	0.0397988	0.0363029		Q61414	Keratin, type I cytoskeletal 15 OS=Mus musculus GN=Krt15 PE=1 SV=2 - [K1C15_MOUSE]	0	0.0363029	0.0397988	-0.0363029	-0.0397988	-0.00349589
Q9DBB9	Carboxypeptidase N subunit 2 OS=Mus musculus GN=Cpn2 PE=1 SV=2 - [CPN2_MOUSE]	0.0395727	0	0.0729389	0.0395727	-0.0333662	-0.0729389		Q9DBB9	Carboxypeptidase N subunit 2 OS=Mus musculus GN=Cpn2 PE=1 SV=2 - [CPN2_MOUSE]	0.0729389	0	0.0395727	0.0729389	0.0333662	-0.0395727
Q9JM99	Proteoglycan 4 OS=Mus musculus GN=Prg4 PE=1 SV=2 - [PRG4_MOUSE]	0.0390439	0.0795822	0.0149605	-0.0405382	0.0240834	0.0646216		Q9JM99	Proteoglycan 4 OS=Mus musculus GN=Prg4 PE=1 SV=2 - [PRG4_MOUSE]	0.0149605	0.0795822	0.0390439	-0.0646216	-0.0240834	0.0405382
P06683	Complement component C9 OS=Mus musculus GN=C9 PE=1 SV=2 - [CO9_MOUSE]	0.038601	0.0287712	0.0279894	0.00982977	0.0106116	0.000781784		P06683	Complement component C9 OS=Mus musculus GN=C9 PE=1 SV=2 - [CO9_MOUSE]	0.0279894	0.0287712	0.038601	-0.000781784	-0.0106116	-0.00982977
O70362	Phosphatidylinositol-glycan-specific phospholipase D OS=Mus musculus GN=Gpld1 PE=1 SV=1 - [PHLD_MOUSE]	0.0380803	0	0.0473033	0.0380803	-0.00922298	-0.0473033		O70362	Phosphatidylinositol-glycan-specific phospholipase D OS=Mus musculus GN=Gpld1 PE=1 SV=1 - [PHLD_MOUSE]	0.0473033	0	0.0380803	0.0473033	0.00922298	-0.0380803
P97298	Pigment epithelium-derived factor OS=Mus musculus GN=Serpinf1 PE=1 SV=2 - [PEDF_MOUSE]	0.0345099	0	0.122775	0.0345099	-0.0882646	-0.122775		P97298	Pigment epithelium-derived factor OS=Mus musculus GN=Serpinf1 PE=1 SV=2 - [PEDF_MOUSE]	0.122775	0	0.0345099	0.122775	0.0882646	-0.0345099
P10852	4F2 cell-surface antigen heavy chain OS=Mus musculus GN=Slc3a2 PE=1 SV=1 - [4F2_MOUSE]	0.0335231	0	0	0.0335231	0.0335231	0		P10852	4F2 cell-surface antigen heavy chain OS=Mus musculus GN=Slc3a2 PE=1 SV=1 - [4F2_MOUSE]	0	0	0.0335231	0	-0.0335231	-0.0335231
P24270	Catalase OS=Mus musculus GN=Cat PE=1 SV=4 - [CATA_MOUSE]	0.0327055	0	0	0.0327055	0.0327055	0		P24270	Catalase OS=Mus musculus GN=Cat PE=1 SV=4 - [CATA_MOUSE]	0	0	0.0327055	0	-0.0327055	-0.0327055
Q9JHH6	Carboxypeptidase B2 OS=Mus musculus GN=Cpb2 PE=1 SV=1 - [CBPB2_MOUSE]	0.0326484	0.0463562	0	-0.0137078	0.0326484	0.0463562		Q9JHH6	Carboxypeptidase B2 OS=Mus musculus GN=Cpb2 PE=1 SV=1 - [CBPB2_MOUSE]	0	0.0463562	0.0326484	-0.0463562	-0.0326484	0.0137078
Q91Y47	Coagulation factor XI OS=Mus musculus GN=F11 PE=2 SV=2 - [FA11_MOUSE]	0.022863	0.0870355	0.0248668	-0.0641725	-0.00200382	0.0621687		Q91Y47	Coagulation factor XI OS=Mus musculus GN=F11 PE=2 SV=2 - [FA11_MOUSE]	0.0248668	0.0870355	0.022863	-0.0621687	0.00200382	0.0641725
Q3TTY5	Keratin, type II cytoskeletal 2 epidermal OS=Mus musculus GN=Krt2 PE=1 SV=1 - [K22E_MOUSE]	0.0224964	0	0	0.0224964	0.0224964	0		Q3TTY5	Keratin, type II cytoskeletal 2 epidermal OS=Mus musculus GN=Krt2 PE=1 SV=1 - [K22E_MOUSE]	0	0	0.0224964	0	-0.0224964	-0.0224964
Q00519	Xanthine dehydrogenase/oxidase OS=Mus musculus GN=Xdh PE=1 SV=5 - [XDH_MOUSE]	0.0163299	0	0	0.0163299	0.0163299	0		Q00519	Xanthine dehydrogenase/oxidase OS=Mus musculus GN=Xdh PE=1 SV=5 - [XDH_MOUSE]	0	0	0.0163299	0	-0.0163299	-0.0163299
Q9R1E6	Ectonucleotide pyrophosphatase/phosphodiesterase family member 2 OS=Mus musculus GN=Enpp2 PE=1 SV=3 - [ENPP2_MOUSE]	0.0161355	0.0409501	0.0175497	-0.0248146	-0.00141419	0.0234004		Q9R1E6	Ectonucleotide pyrophosphatase/phosphodiesterase family member 2 OS=Mus musculus GN=Enpp2 PE=1 SV=3 - [ENPP2_MOUSE]	0.0175497	0.0409501	0.0161355	-0.0234004	0.00141419	0.0248146
Q61704	Inter-alpha-trypsin inhibitor heavy chain H3 OS=Mus musculus GN=Itih3 PE=1 SV=3 - [ITIH3_MOUSE]	0.0160585	0	0	0.0160585	0.0160585	0		Q61704	Inter-alpha-trypsin inhibitor heavy chain H3 OS=Mus musculus GN=Itih3 PE=1 SV=3 - [ITIH3_MOUSE]	0	0	0.0160585	0	-0.0160585	-0.0160585
Q7TPR4	Alpha-actinin-1 OS=Mus musculus GN=Actn1 PE=1 SV=1 - [ACTN1_MOUSE]	0.0154804	0	0	0.0154804	0.0154804	0		Q7TPR4	Alpha-actinin-1 OS=Mus musculus GN=Actn1 PE=1 SV=1 - [ACTN1_MOUSE]	0	0	0.0154804	0	-0.0154804	-0.0154804
Q61768	Kinesin-1 heavy chain OS=Mus musculus GN=Kif5b PE=1 SV=3 - [KINH_MOUSE]	0.0145642	0	0	0.0145642	0.0145642	0		Q61768	Kinesin-1 heavy chain OS=Mus musculus GN=Kif5b PE=1 SV=3 - [KINH_MOUSE]	0	0	0.0145642	0	-0.0145642	-0.0145642
B2RPV6	Multimerin-1 OS=Mus musculus GN=Mmrn1 PE=1 SV=2 - [MMRN1_MOUSE]	0.0117228	0.0131064	0	-0.00138357	0.0117228	0.0131064		B2RPV6	Multimerin-1 OS=Mus musculus GN=Mmrn1 PE=1 SV=2 - [MMRN1_MOUSE]	0	0.0131064	0.0117228	-0.0131064	-0.0117228	0.00138357
P01796	Ig heavy chain V-III region A4 OS=Mus musculus PE=1 SV=1 - [HVM27_MOUSE]	0	0.804293	0.435032	-0.804293	-0.435032	0.369261		P01796	Ig heavy chain V-III region A4 OS=Mus musculus PE=1 SV=1 - [HVM27_MOUSE]	0.435032	0.804293	0	-0.369261	0.435032	0.804293
P31725	Protein S100-A9 OS=Mus musculus GN=S100a9 PE=1 SV=3 - [S10A9_MOUSE]	0	0.378682	0	-0.378682	0	0.378682		P31725	Protein S100-A9 OS=Mus musculus GN=S100a9 PE=1 SV=3 - [S10A9_MOUSE]	0	0.378682	0	-0.378682	0	0.378682
P08905	Lysozyme C-2 OS=Mus musculus GN=Lyz2 PE=1 SV=2 - [LYZ2_MOUSE]	0	0.363955	0	-0.363955	0	0.363955		P08905	Lysozyme C-2 OS=Mus musculus GN=Lyz2 PE=1 SV=2 - [LYZ2_MOUSE]	0	0.363955	0	-0.363955	0	0.363955
P26040	Ezrin OS=Mus musculus GN=Ezr PE=1 SV=3 - [EZRI_MOUSE]	0	0.187874	0.0635562	-0.187874	-0.0635562	0.124318		P26040	Ezrin OS=Mus musculus GN=Ezr PE=1 SV=3 - [EZRI_MOUSE]	0.0635562	0.187874	0	-0.124318	0.0635562	0.187874
O88844	Isocitrate dehydrogenase [NADP] cytoplasmic OS=Mus musculus GN=Idh1 PE=1 SV=2 - [IDHC_MOUSE]	0	0.173515	0.192503	-0.173515	-0.192503	-0.0189881		O88844	Isocitrate dehydrogenase [NADP] cytoplasmic OS=Mus musculus GN=Idh1 PE=1 SV=2 - [IDHC_MOUSE]	0.192503	0.173515	0	0.0189881	0.192503	0.173515
P43025	Tetranectin OS=Mus musculus GN=Clec3b PE=1 SV=2 - [TETN_MOUSE]	0	0.101785	0	-0.101785	0	0.101785		P43025	Tetranectin OS=Mus musculus GN=Clec3b PE=1 SV=2 - [TETN_MOUSE]	0	0.101785	0	-0.101785	0	0.101785
P17742	Peptidyl-prolyl cis-trans isomerase A OS=Mus musculus GN=Ppia PE=1 SV=2 - [PPIA_MOUSE]	0	0.099262	0	-0.099262	0	0.099262		P17742	Peptidyl-prolyl cis-trans isomerase A OS=Mus musculus GN=Ppia PE=1 SV=2 - [PPIA_MOUSE]	0	0.099262	0	-0.099262	0	0.099262
P52430	Serum paraoxonase/arylesterase 1 OS=Mus musculus GN=Pon1 PE=1 SV=2 - [PON1_MOUSE]	0	0.0858878	0	-0.0858878	0	0.0858878		P52430	Serum paraoxonase/arylesterase 1 OS=Mus musculus GN=Pon1 PE=1 SV=2 - [PON1_MOUSE]	0	0.0858878	0	-0.0858878	0	0.0858878
P29699	Alpha-2-HS-glycoprotein OS=Mus musculus GN=Ahsg PE=1 SV=1 - [FETUA_MOUSE]	0	0.0716884	0.164678	-0.0716884	-0.164678	-0.09299		P29699	Alpha-2-HS-glycoprotein OS=Mus musculus GN=Ahsg PE=1 SV=1 - [FETUA_MOUSE]	0.164678	0.0716884	0	0.09299	0.164678	0.0716884
P08730	Keratin, type I cytoskeletal 13 OS=Mus musculus GN=Krt13 PE=1 SV=2 - [K1C13_MOUSE]	0	0.0474396	0.0545097	-0.0474396	-0.0545097	-0.00707009		P08730	Keratin, type I cytoskeletal 13 OS=Mus musculus GN=Krt13 PE=1 SV=2 - [K1C13_MOUSE]	0.0545097	0.0474396	0	0.00707009	0.0545097	0.0474396
Q01339	Beta-2-glycoprotein 1 OS=Mus musculus GN=Apoh PE=1 SV=1 - [APOH_MOUSE]	0	0.0461932	0	-0.0461932	0	0.0461932		Q01339	Beta-2-glycoprotein 1 OS=Mus musculus GN=Apoh PE=1 SV=1 - [APOH_MOUSE]	0	0.0461932	0	-0.0461932	0	0.0461932
Q9JKR6	Hypoxia up-regulated protein 1 OS=Mus musculus GN=Hyou1 PE=1 SV=1 - [HYOU1_MOUSE]	0	0.020376	0.0156085	-0.020376	-0.0156085	0.00476753		Q9JKR6	Hypoxia up-regulated protein 1 OS=Mus musculus GN=Hyou1 PE=1 SV=1 - [HYOU1_MOUSE]	0.0156085	0.020376	0	-0.00476753	0.0156085	0.020376
P01670	Ig kappa chain V-III region PC 6684 OS=Mus musculus PE=1 SV=1 - [KV3AI_MOUSE]	0	0	0.792768	0	-0.792768	-0.792768		P01670	Ig kappa chain V-III region PC 6684 OS=Mus musculus PE=1 SV=1 - [KV3AI_MOUSE]	0.792768	0	0	0.792768	0.792768	0	+
Q8K1I3	Secreted phosphoprotein 24 OS=Mus musculus GN=Spp2 PE=1 SV=2 - [SPP24_MOUSE]	0	0	0.112513	0	-0.112513	-0.112513		Q8K1I3	Secreted phosphoprotein 24 OS=Mus musculus GN=Spp2 PE=1 SV=2 - [SPP24_MOUSE]	0.112513	0	0	0.112513	0.112513	0
P21614	Vitamin D-binding protein OS=Mus musculus GN=Gc PE=1 SV=2 - [VTDB_MOUSE]	0	0	0.0897168	0	-0.0897168	-0.0897168		P21614	Vitamin D-binding protein OS=Mus musculus GN=Gc PE=1 SV=2 - [VTDB_MOUSE]	0.0897168	0	0	0.0897168	0.0897168	0
P21550	Beta-enolase OS=Mus musculus GN=Eno3 PE=1 SV=3 - [ENOB_MOUSE]	0	0	0.083807	0	-0.083807	-0.083807		P21550	Beta-enolase OS=Mus musculus GN=Eno3 PE=1 SV=3 - [ENOB_MOUSE]	0.083807	0	0	0.083807	0.083807	0
Q9DCD0	6-phosphogluconate dehydrogenase, decarboxylating OS=Mus musculus GN=Pgd PE=1 SV=3 - [6PGD_MOUSE]	0	0	0.041423	0	-0.041423	-0.041423		Q9DCD0	6-phosphogluconate dehydrogenase, decarboxylating OS=Mus musculus GN=Pgd PE=1 SV=3 - [6PGD_MOUSE]	0.041423	0	0	0.041423	0.041423	0
Q9Z2K1	Keratin, type I cytoskeletal 16 OS=Mus musculus GN=Krt16 PE=1 SV=3 - [K1C16_MOUSE]	0	0	0.033627	0	-0.033627	-0.033627		Q9Z2K1	Keratin, type I cytoskeletal 16 OS=Mus musculus GN=Krt16 PE=1 SV=3 - [K1C16_MOUSE]	0.033627	0	0	0.033627	0.033627	0
P82198	Transforming growth factor-beta-induced protein ig-h3 OS=Mus musculus GN=Tgfbi PE=1 SV=1 - [BGH3_MOUSE]	0	0	0.0295675	0	-0.0295675	-0.0295675		P82198	Transforming growth factor-beta-induced protein ig-h3 OS=Mus musculus GN=Tgfbi PE=1 SV=1 - [BGH3_MOUSE]	0.0295675	0	0	0.0295675	0.0295675	0
P01672	Ig kappa chain V-III region PC 7940 OS=Mus musculus PE=1 SV=1 - [KV3AK_MOUSE]	0	0	0	0	0	0		P01672	Ig kappa chain V-III region PC 7940 OS=Mus musculus PE=1 SV=1 - [KV3AK_MOUSE]	0	0	0	0	0	0
P01671	Ig kappa chain V-III region PC 7175 OS=Mus musculus PE=1 SV=1 - [KV3AJ_MOUSE]	0	0	0	0	0	0		P01671	Ig kappa chain V-III region PC 7175 OS=Mus musculus PE=1 SV=1 - [KV3AJ_MOUSE]	0	0	0	0	0	0
P04942	Ig kappa chain V-VI region NQ5-61.1.2 OS=Mus musculus PE=2 SV=1 - [KV6A8_MOUSE]	0	0	0	0	0	0		P04942	Ig kappa chain V-VI region NQ5-61.1.2 OS=Mus musculus PE=2 SV=1 - [KV6A8_MOUSE]	0	0	0	0	0	0
P18525	Ig heavy chain V region 5-84 OS=Mus musculus PE=1 SV=1 - [HVM54_MOUSE]	0	0	0	0	0	0		P18525	Ig heavy chain V region 5-84 OS=Mus musculus PE=1 SV=1 - [HVM54_MOUSE]	0	0	0	0	0	0
Q9Z126	Platelet factor 4 OS=Mus musculus GN=Pf4 PE=1 SV=1 - [PLF4_MOUSE]	0	0	0	0	0	0		Q9Z126	Platelet factor 4 OS=Mus musculus GN=Pf4 PE=1 SV=1 - [PLF4_MOUSE]	0	0	0	0	0	0
P01660	Ig kappa chain V-III region PC 3741/TEPC 111 OS=Mus musculus PE=1 SV=1 - [KV3A8_MOUSE]	0	0	0	0	0	0		P01660	Ig kappa chain V-III region PC 3741/TEPC 111 OS=Mus musculus PE=1 SV=1 - [KV3A8_MOUSE]	0	0	0	0	0	0
P01789	Ig heavy chain V region M603 OS=Mus musculus PE=1 SV=1 - [HVM20_MOUSE]	0	0	0	0	0	0		P01789	Ig heavy chain V region M603 OS=Mus musculus PE=1 SV=1 - [HVM20_MOUSE]	0	0	0	0	0	0
P05064	Fructose-bisphosphate aldolase A OS=Mus musculus GN=Aldoa PE=1 SV=2 - [ALDOA_MOUSE]	0	0	0	0	0	0		P05064	Fructose-bisphosphate aldolase A OS=Mus musculus GN=Aldoa PE=1 SV=2 - [ALDOA_MOUSE]	0	0	0	0	0	0
P99024	Tubulin beta-5 chain OS=Mus musculus GN=Tubb5 PE=1 SV=1 - [TBB5_MOUSE]	0	0	0	0	0	0		P99024	Tubulin beta-5 chain OS=Mus musculus GN=Tubb5 PE=1 SV=1 - [TBB5_MOUSE]	0	0	0	0	0	0
Q9JJH1	Ribonuclease 4 OS=Mus musculus GN=Rnase4 PE=1 SV=1 - [RNAS4_MOUSE]	0	0	0	0	0	0		Q9JJH1	Ribonuclease 4 OS=Mus musculus GN=Rnase4 PE=1 SV=1 - [RNAS4_MOUSE]	0	0	0	0	0	0
P39876	Metalloproteinase inhibitor 3 OS=Mus musculus GN=Timp3 PE=1 SV=1 - [TIMP3_MOUSE]	0	0	0	0	0	0		P39876	Metalloproteinase inhibitor 3 OS=Mus musculus GN=Timp3 PE=1 SV=1 - [TIMP3_MOUSE]	0	0	0	0	0	0
P01637	Ig kappa chain V-V region T1 OS=Mus musculus PE=4 SV=1 - [KV5A5_MOUSE]	0	0	0	0	0	0		P01637	Ig kappa chain V-V region T1 OS=Mus musculus PE=4 SV=1 - [KV5A5_MOUSE]	0	0	0	0	0	0
P70274	Selenoprotein P OS=Mus musculus GN=Sepp1 PE=1 SV=3 - [SEPP1_MOUSE]	0	0	0	0	0	0		P70274	Selenoprotein P OS=Mus musculus GN=Sepp1 PE=1 SV=3 - [SEPP1_MOUSE]	0	0	0	0	0	0
P26262	Plasma kallikrein OS=Mus musculus GN=Klkb1 PE=1 SV=2 - [KLKB1_MOUSE]	0	0	0	0	0	0		P26262	Plasma kallikrein OS=Mus musculus GN=Klkb1 PE=1 SV=2 - [KLKB1_MOUSE]	0	0	0	0	0	0
Q8VCM7	Fibrinogen gamma chain OS=Mus musculus GN=Fgg PE=1 SV=1 - [FIBG_MOUSE]	0	0	0	0	0	0		Q8VCM7	Fibrinogen gamma chain OS=Mus musculus GN=Fgg PE=1 SV=1 - [FIBG_MOUSE]	0	0	0	0	0	0
Q6URW6	Myosin-14 OS=Mus musculus GN=Myh14 PE=1 SV=1 - [MYH14_MOUSE]	0	0	0	0	0	0		Q6URW6	Myosin-14 OS=Mus musculus GN=Myh14 PE=1 SV=1 - [MYH14_MOUSE]	0	0	0	0	0	0
Q9QUM9	Proteasome subunit alpha type-6 OS=Mus musculus GN=Psma6 PE=1 SV=1 - [PSA6_MOUSE]	0	0	0	0	0	0		Q9QUM9	Proteasome subunit alpha type-6 OS=Mus musculus GN=Psma6 PE=1 SV=1 - [PSA6_MOUSE]	0	0	0	0	0	0
P06151	L-lactate dehydrogenase A chain OS=Mus musculus GN=Ldha PE=1 SV=3 - [LDHA_MOUSE]	0	0	0	0	0	0		P06151	L-lactate dehydrogenase A chain OS=Mus musculus GN=Ldha PE=1 SV=3 - [LDHA_MOUSE]	0	0	0	0	0	0
P16858	Glyceraldehyde-3-phosphate dehydrogenase OS=Mus musculus GN=Gapdh PE=1 SV=2 - [G3P_MOUSE]	0	0	0	0	0	0		P16858	Glyceraldehyde-3-phosphate dehydrogenase OS=Mus musculus GN=Gapdh PE=1 SV=2 - [G3P_MOUSE]	0	0	0	0	0	0
P16627	Heat shock 70 kDa protein 1-like OS=Mus musculus GN=Hspa1l PE=1 SV=4 - [HS71L_MOUSE]	0	0	0	0	0	0		P16627	Heat shock 70 kDa protein 1-like OS=Mus musculus GN=Hspa1l PE=1 SV=4 - [HS71L_MOUSE]	0	0	0	0	0	0
Q6GQT1	Alpha-2-macroglobulin-P OS=Mus musculus GN=A2m PE=2 SV=2 - [A2MG_MOUSE]	0	0	0	0	0	0		Q6GQT1	Alpha-2-macroglobulin-P OS=Mus musculus GN=A2m PE=2 SV=2 - [A2MG_MOUSE]	0	0	0	0	0	0
P01627	Ig kappa chain V-II region VKappa167 OS=Mus musculus GN=Gm5153 PE=4 SV=1 - [KV2A2_MOUSE]	0	0	0	0	0	0		P01627	Ig kappa chain V-II region VKappa167 OS=Mus musculus GN=Gm5153 PE=4 SV=1 - [KV2A2_MOUSE]	0	0	0	0	0	0
P11983	T-complex protein 1 subunit alpha OS=Mus musculus GN=Tcp1 PE=1 SV=3 - [TCPA_MOUSE]	0	0	0	0	0	0		P11983	T-complex protein 1 subunit alpha OS=Mus musculus GN=Tcp1 PE=1 SV=3 - [TCPA_MOUSE]	0	0	0	0	0	0
Q9DBD0	Inhibitor of carbonic anhydrase OS=Mus musculus GN=Ica PE=1 SV=1 - [ICA_MOUSE]	0	0	0	0	0	0		Q9DBD0	Inhibitor of carbonic anhydrase OS=Mus musculus GN=Ica PE=1 SV=1 - [ICA_MOUSE]	0	0	0	0	0	0
O54890	Integrin beta-3 OS=Mus musculus GN=Itgb3 PE=1 SV=2 - [ITB3_MOUSE]	0	0	0	0	0	0		O54890	Integrin beta-3 OS=Mus musculus GN=Itgb3 PE=1 SV=2 - [ITB3_MOUSE]	0	0	0	0	0	0
P01634	Ig kappa chain V-V region MOPC 21 OS=Mus musculus PE=1 SV=1 - [KV5A2_MOUSE]	0	0	0	0	0	0		P01634	Ig kappa chain V-V region MOPC 21 OS=Mus musculus PE=1 SV=1 - [KV5A2_MOUSE]	0	0	0	0	0	0
P01632	Ig kappa chain V-I region S107A OS=Mus musculus GN=Igkv7-33 PE=2 SV=1 - [KV1A1_MOUSE]	0	0	0	0	0	0		P01632	Ig kappa chain V-I region S107A OS=Mus musculus GN=Igkv7-33 PE=2 SV=1 - [KV1A1_MOUSE]	0	0	0	0	0	0
O88803	Leukocyte cell-derived chemotaxin-2 OS=Mus musculus GN=Lect2 PE=1 SV=1 - [LECT2_MOUSE]	0	0	0	0	0	0		O88803	Leukocyte cell-derived chemotaxin-2 OS=Mus musculus GN=Lect2 PE=1 SV=1 - [LECT2_MOUSE]	0	0	0	0	0	0
